# Supplementary material
Source: PubMed Central journal article supplement (PMC7196772)

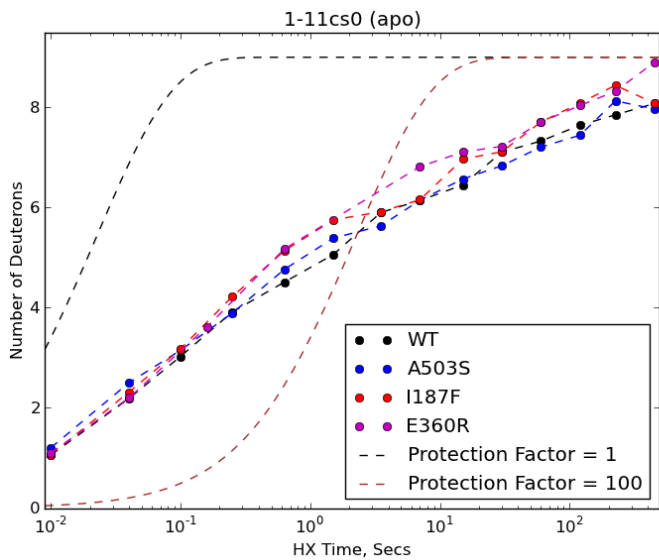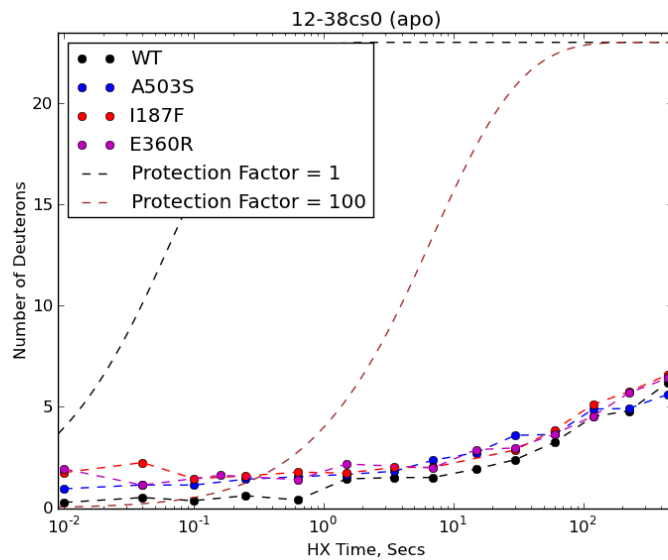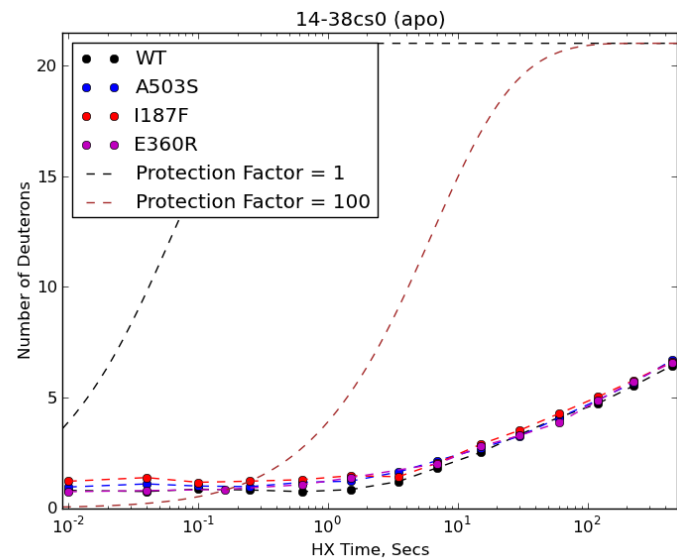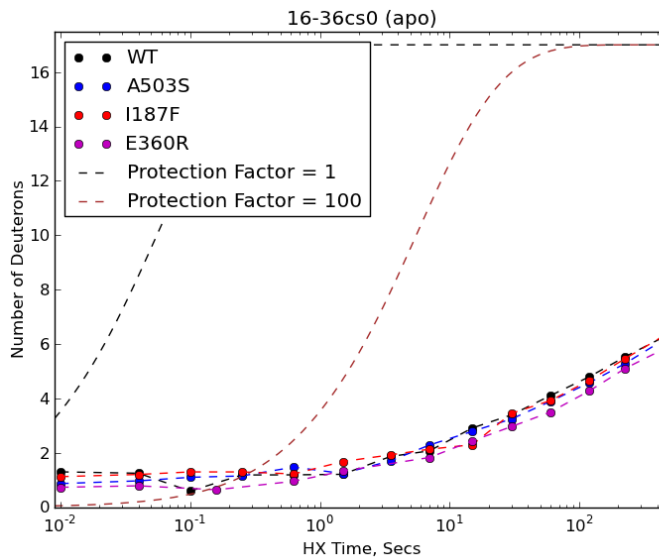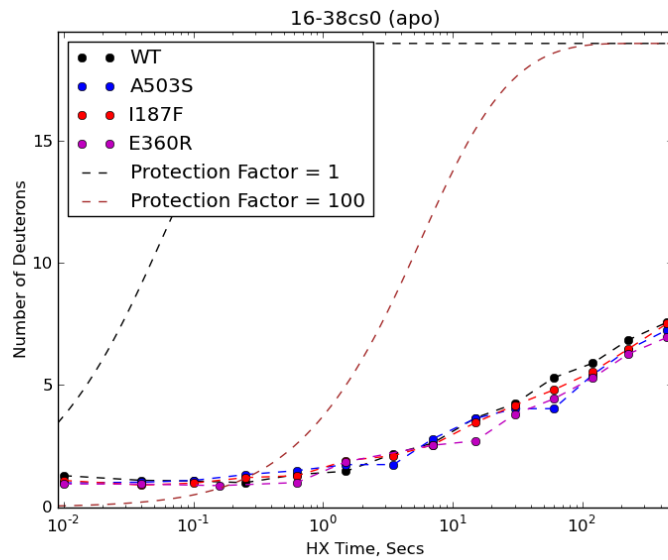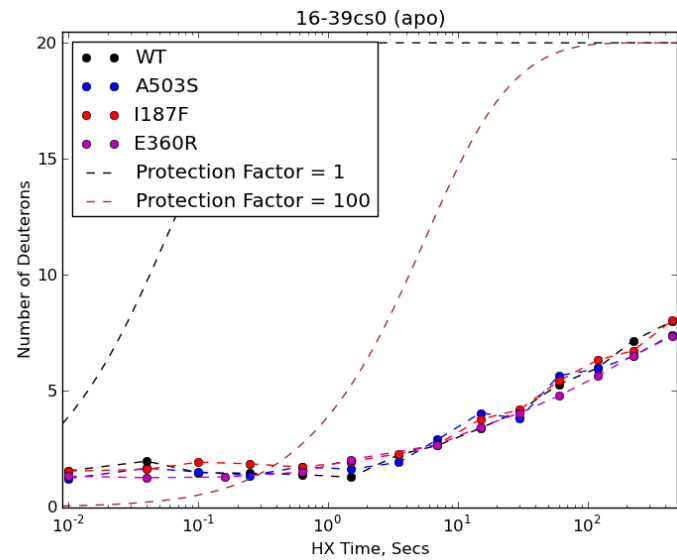

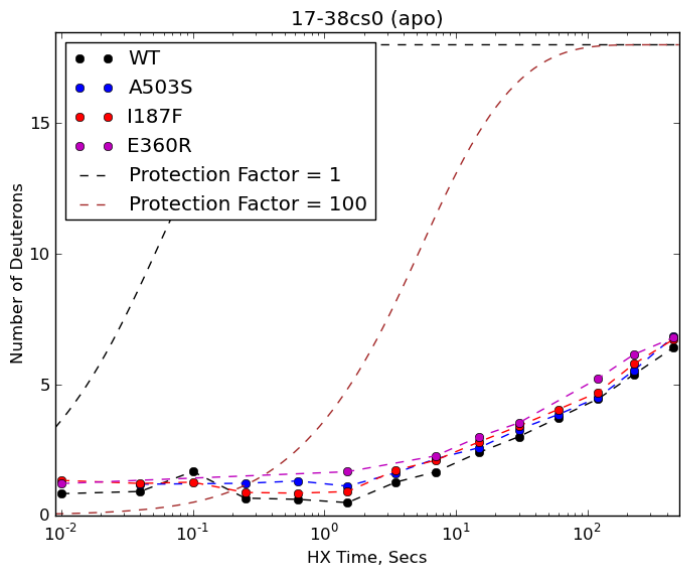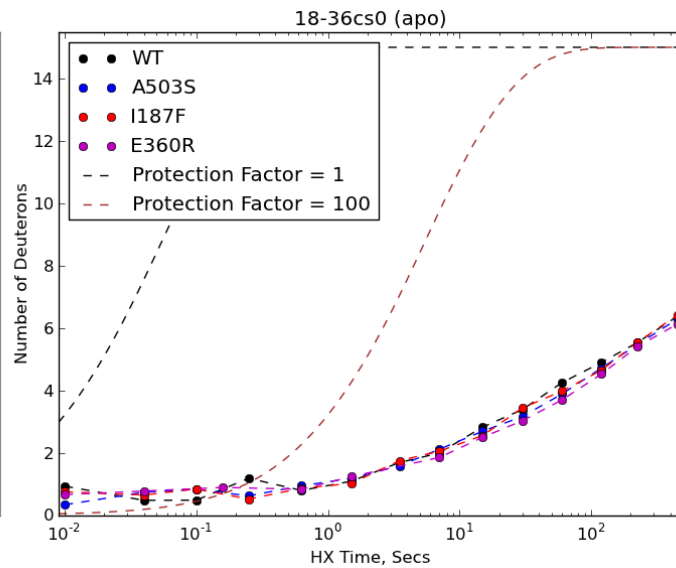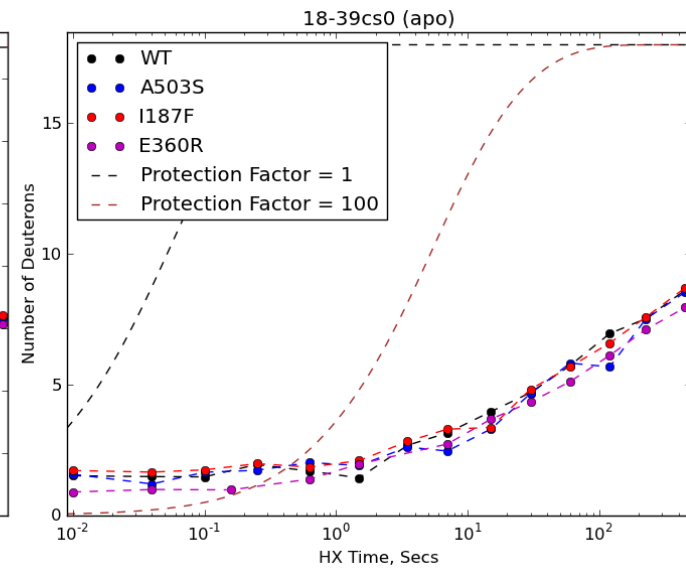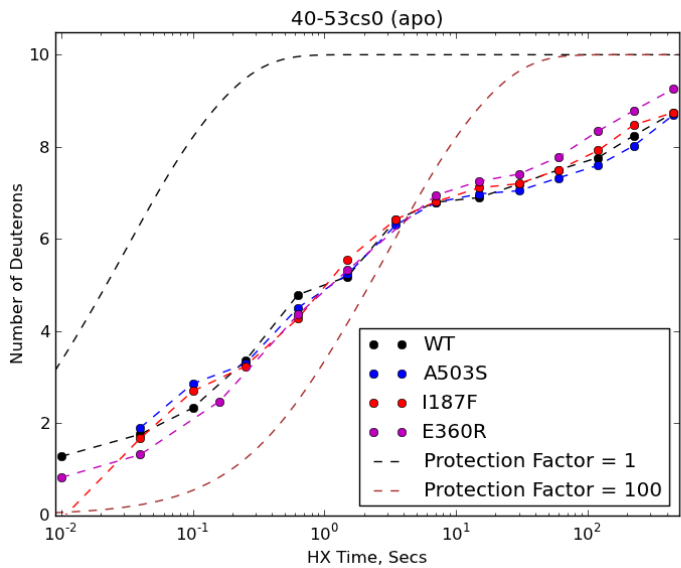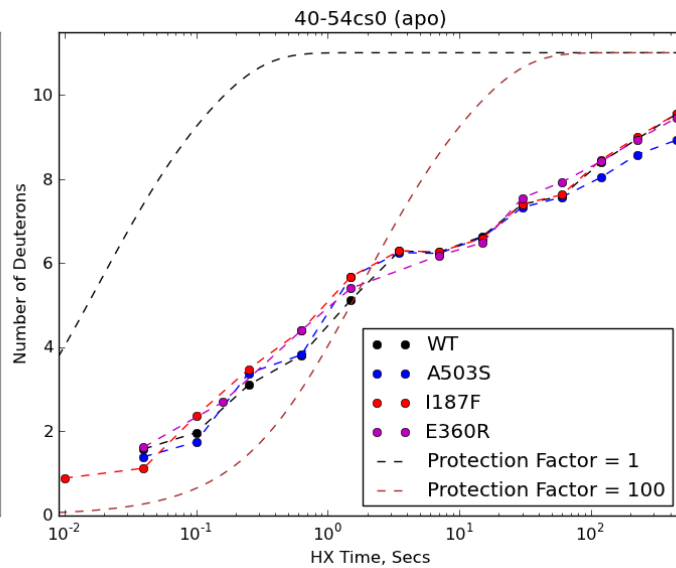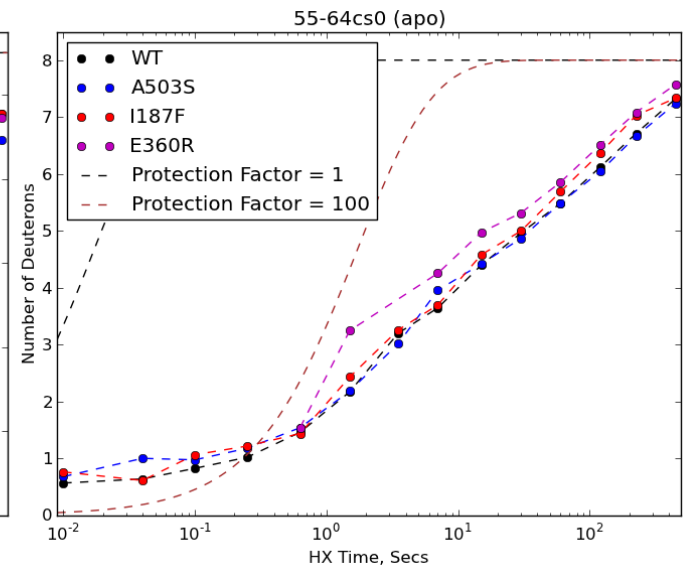

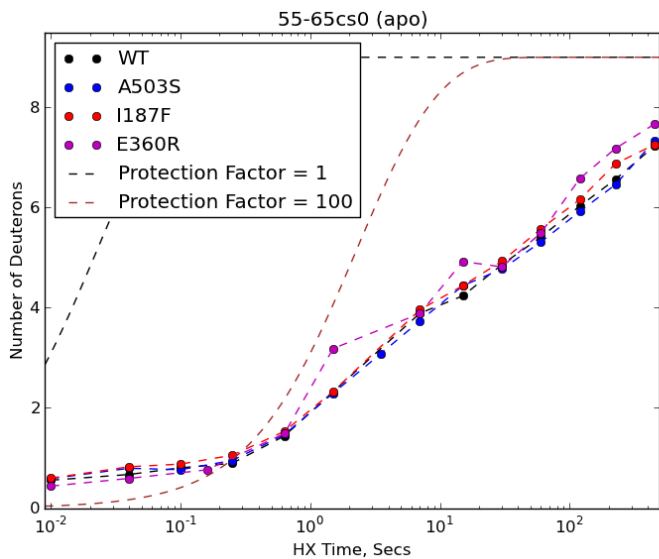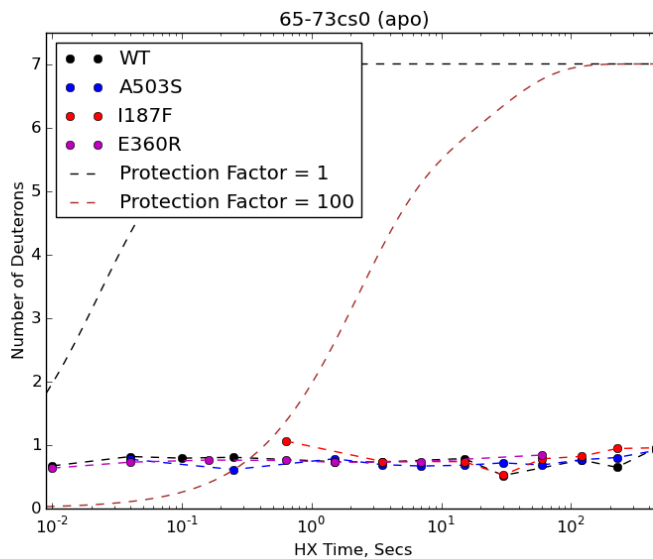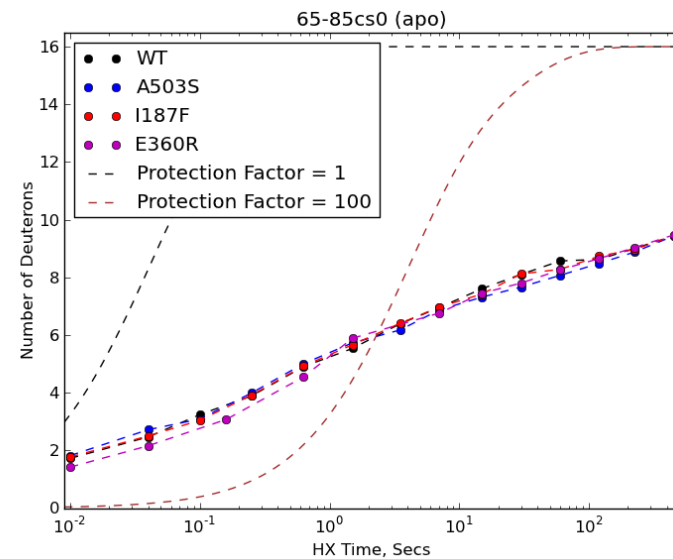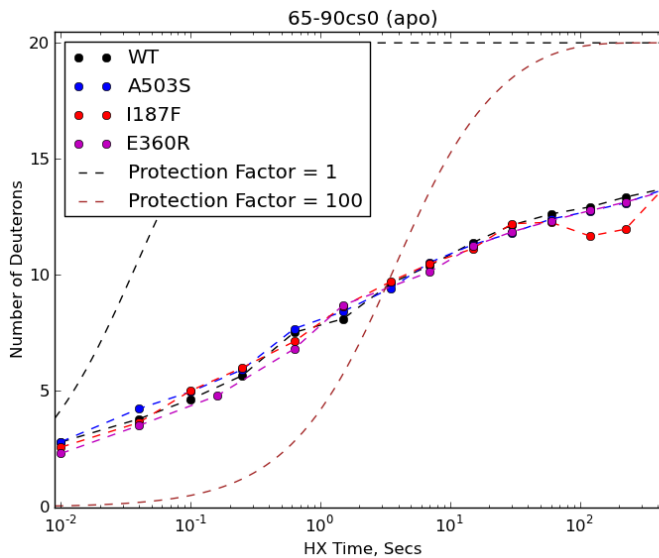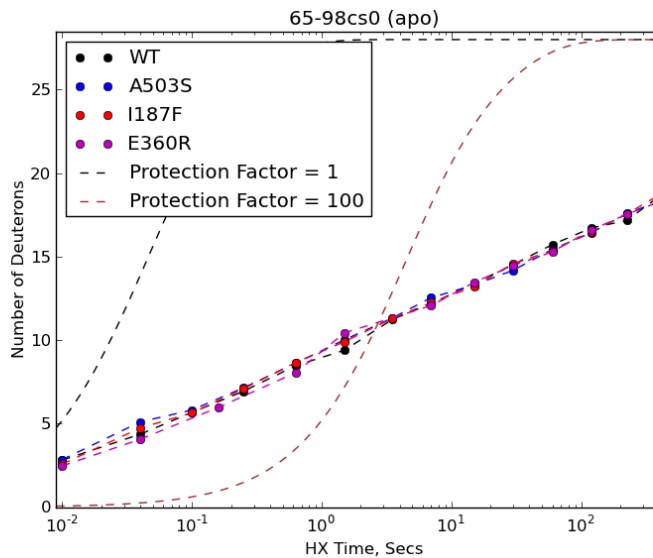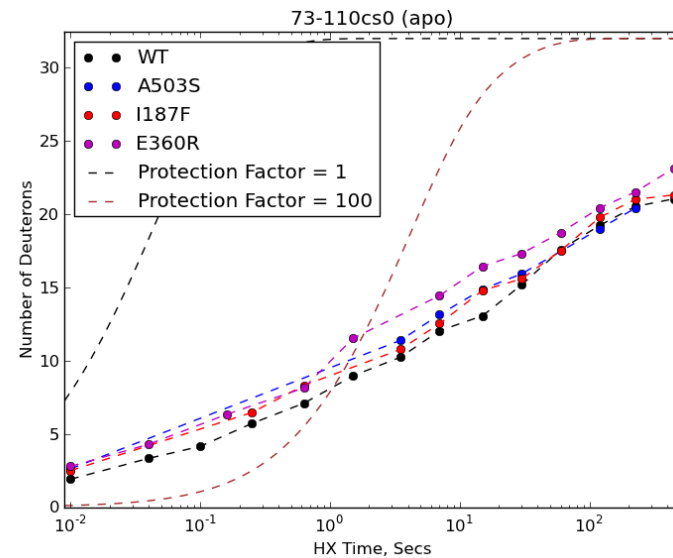

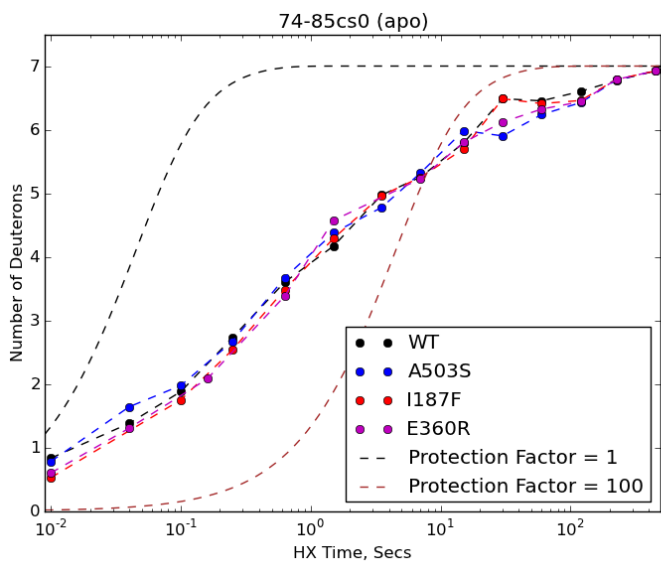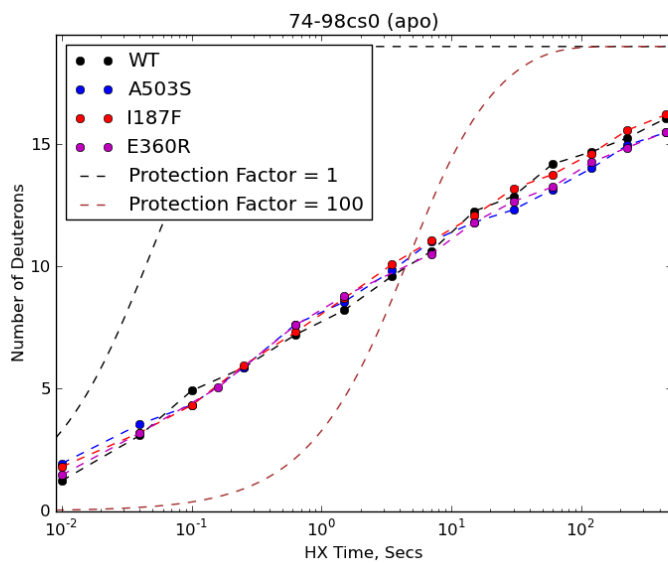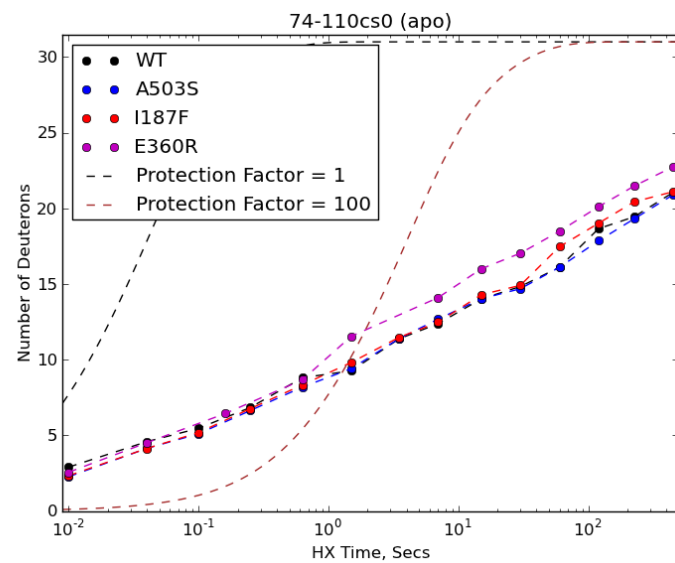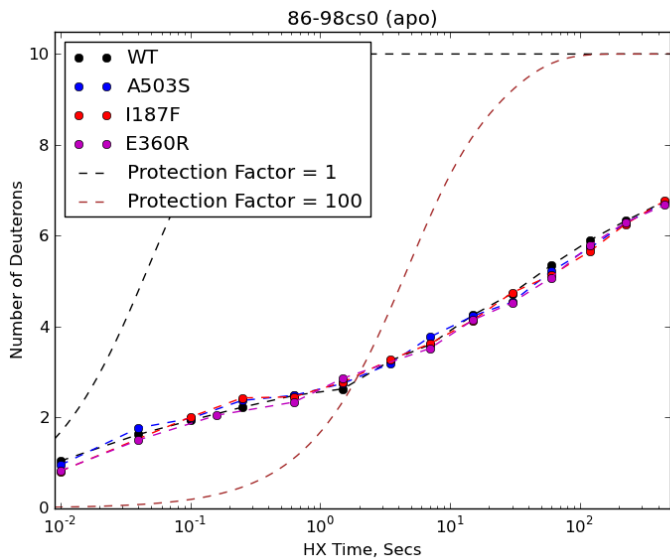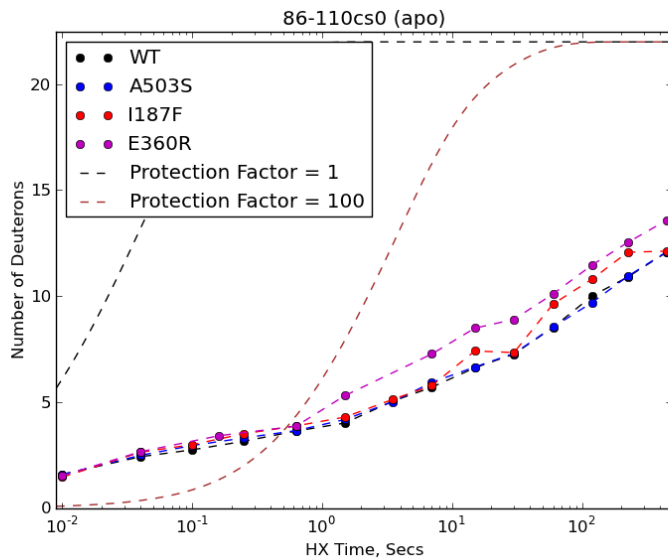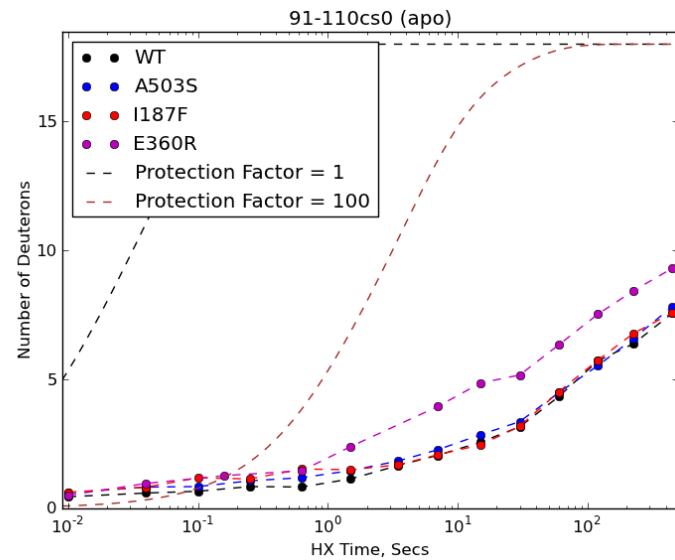

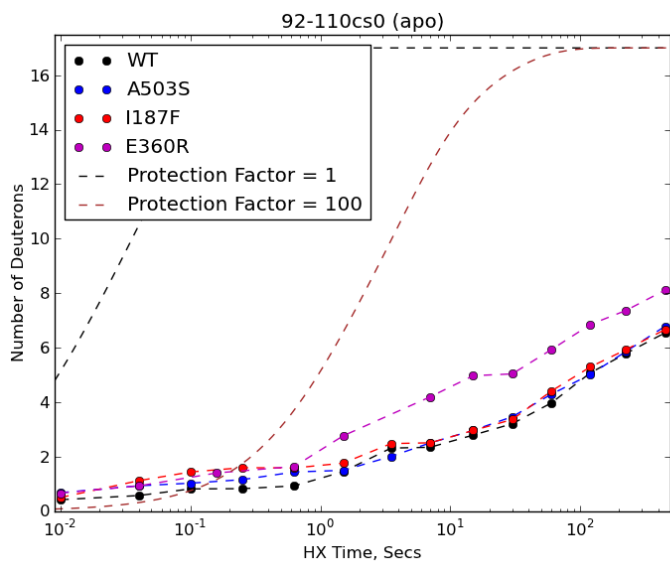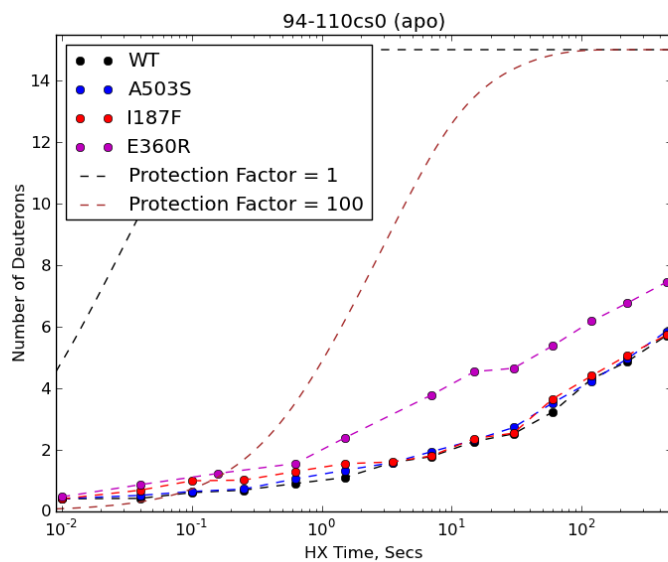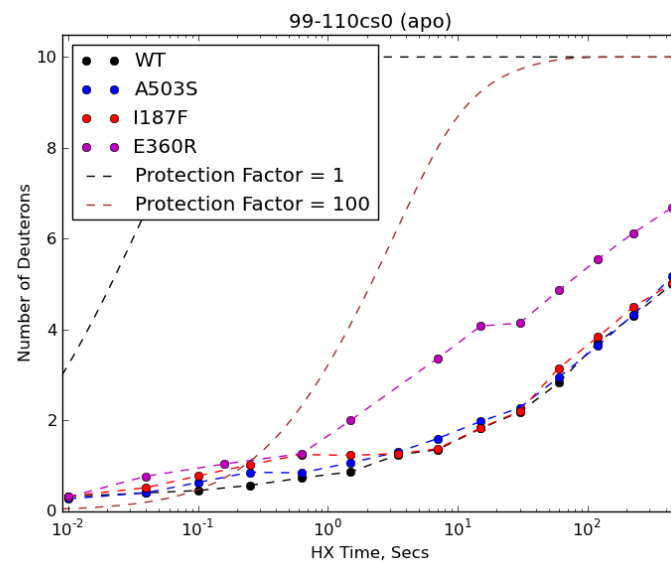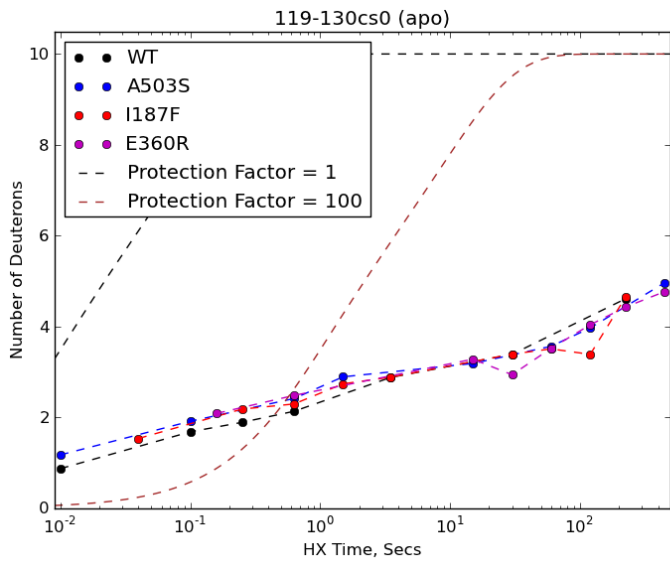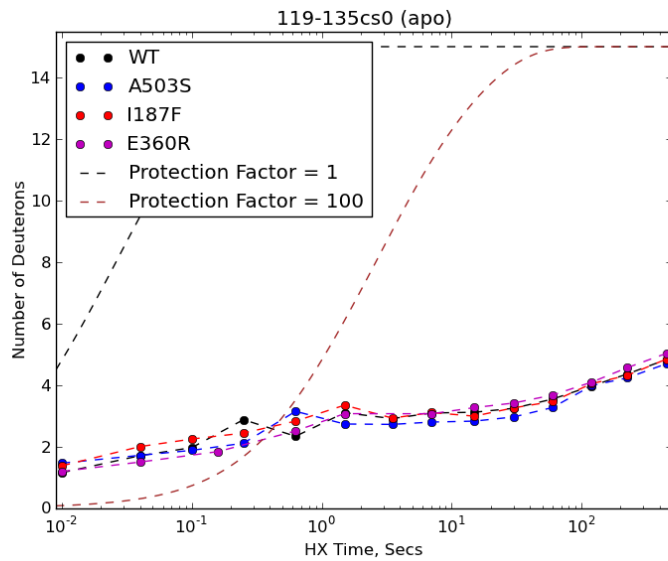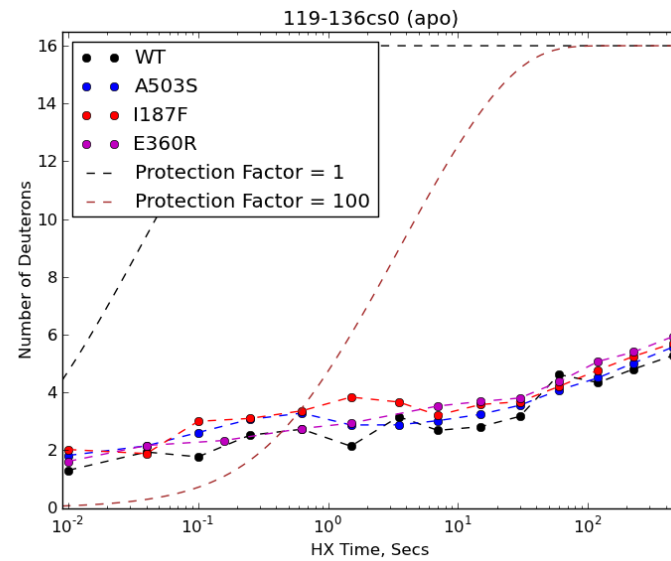

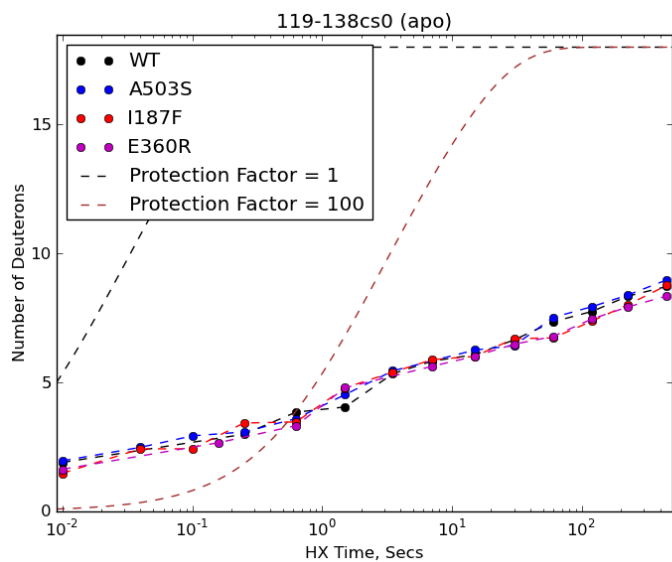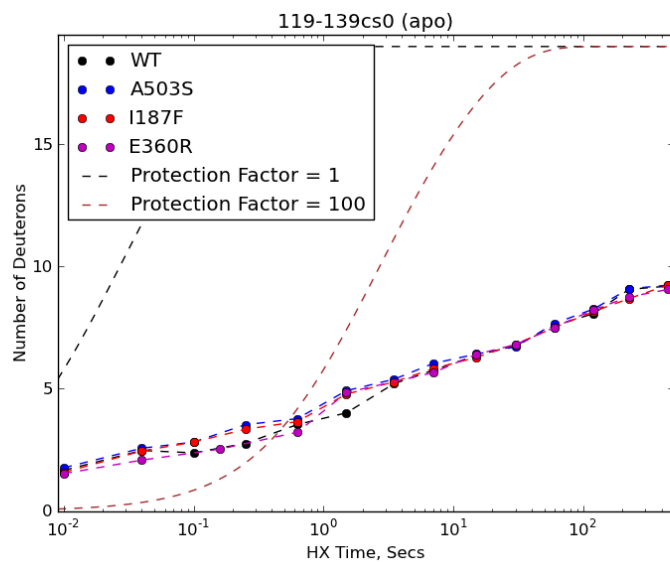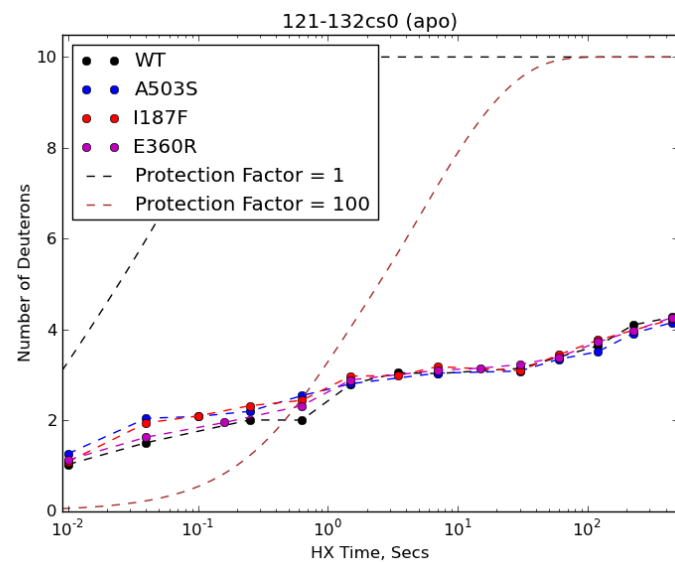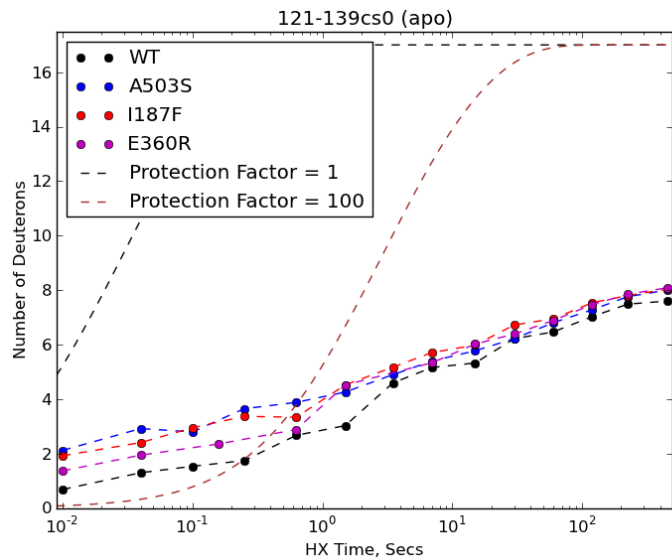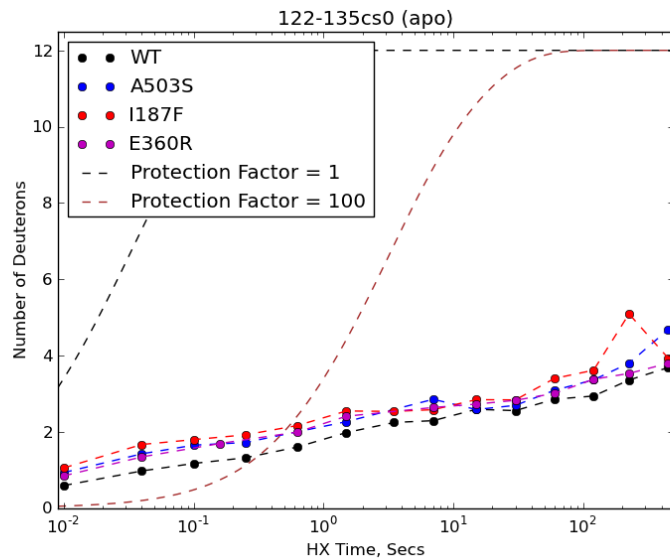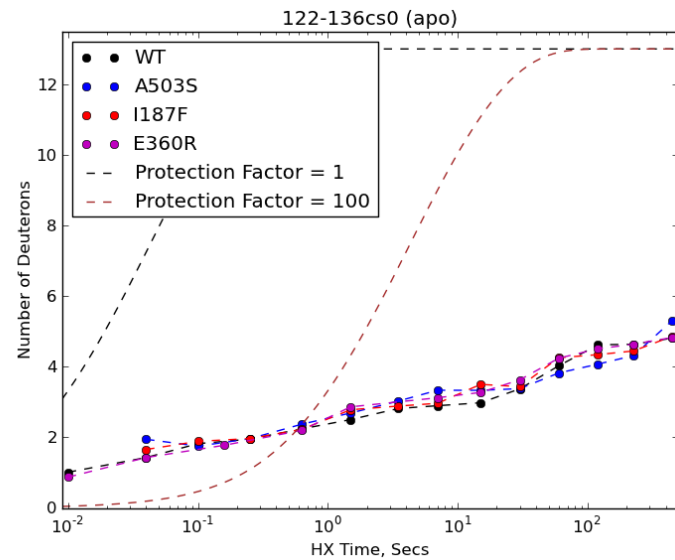

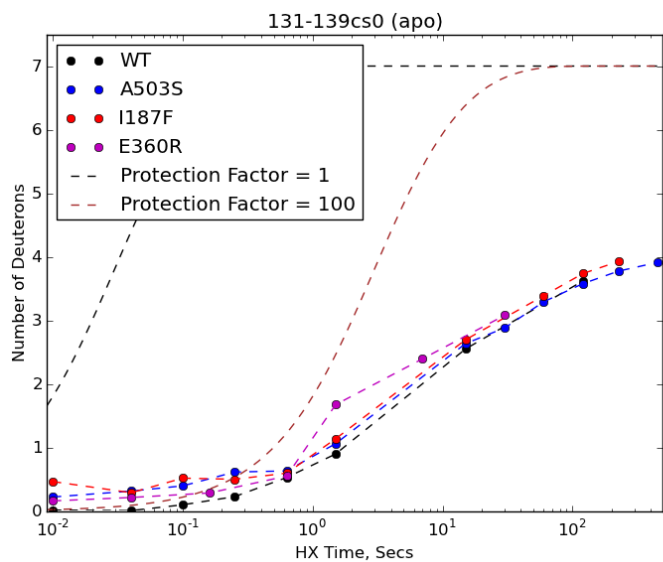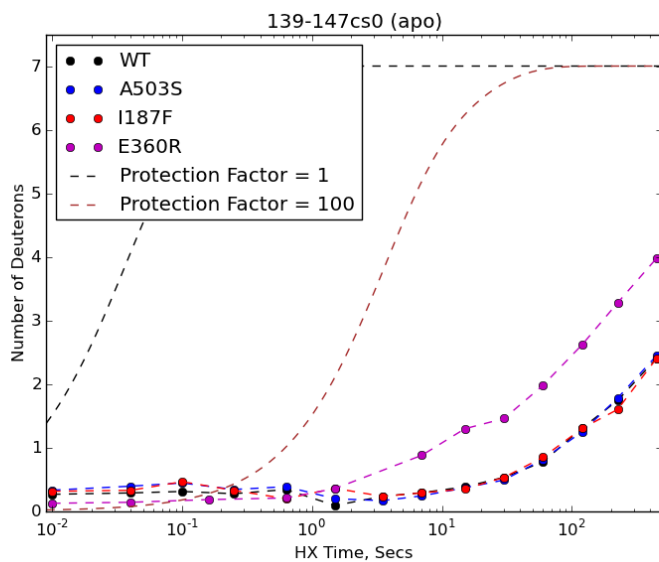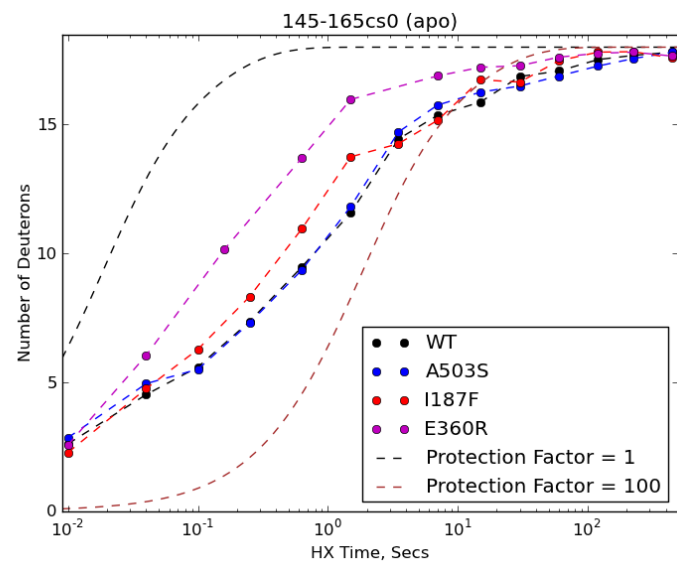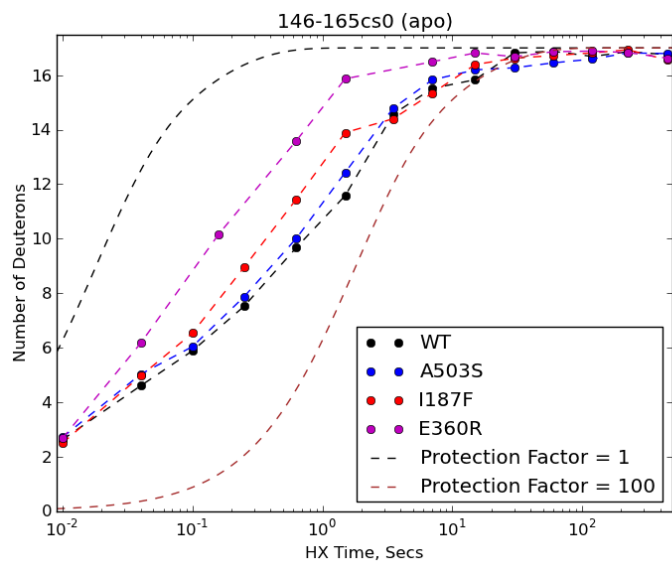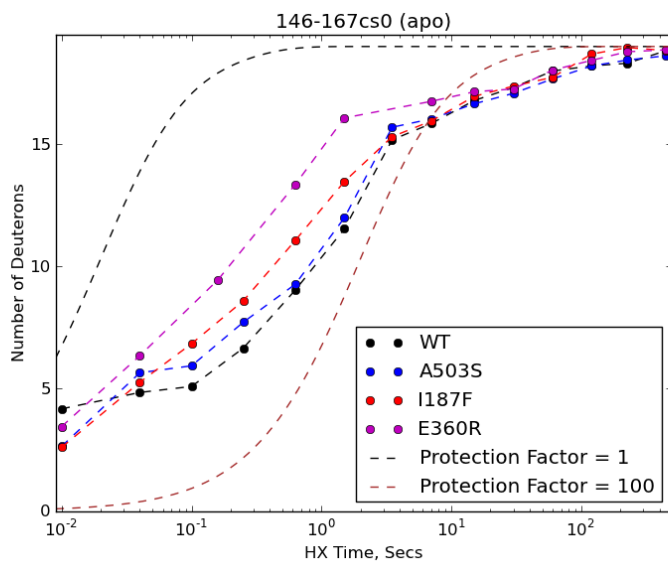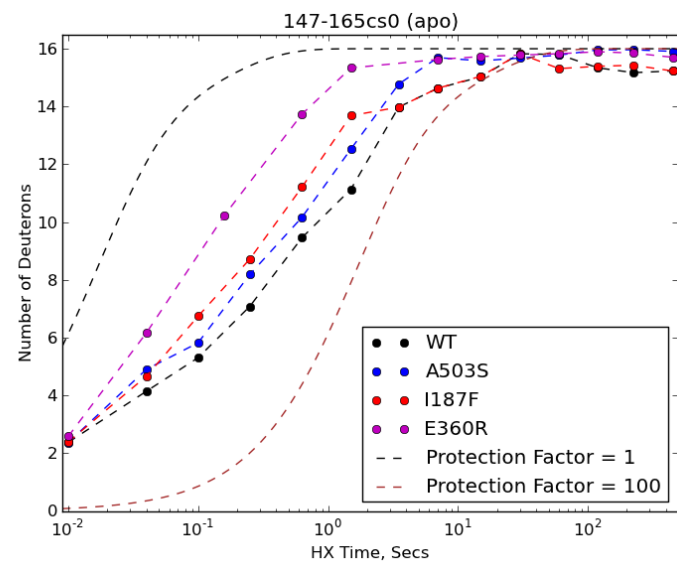

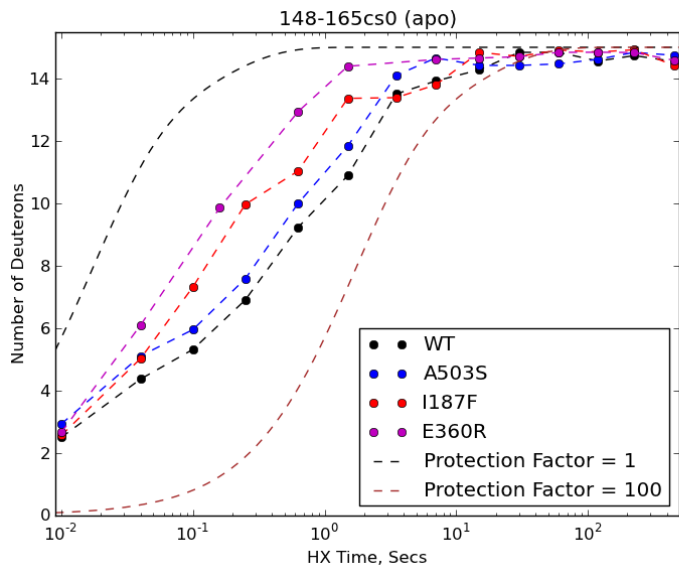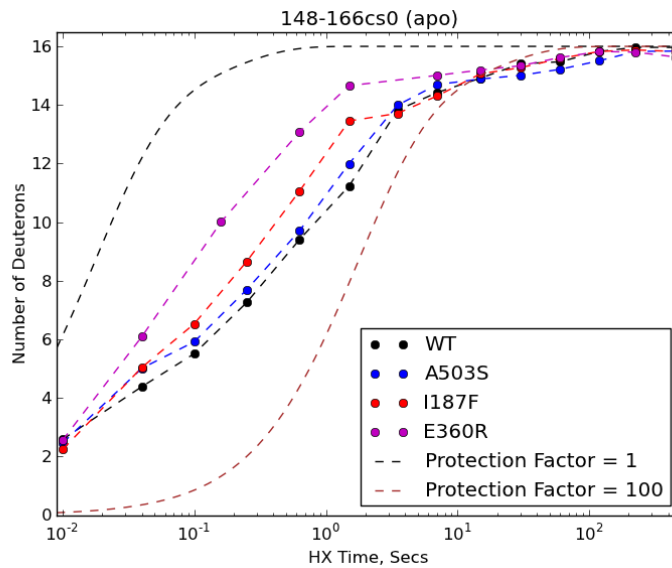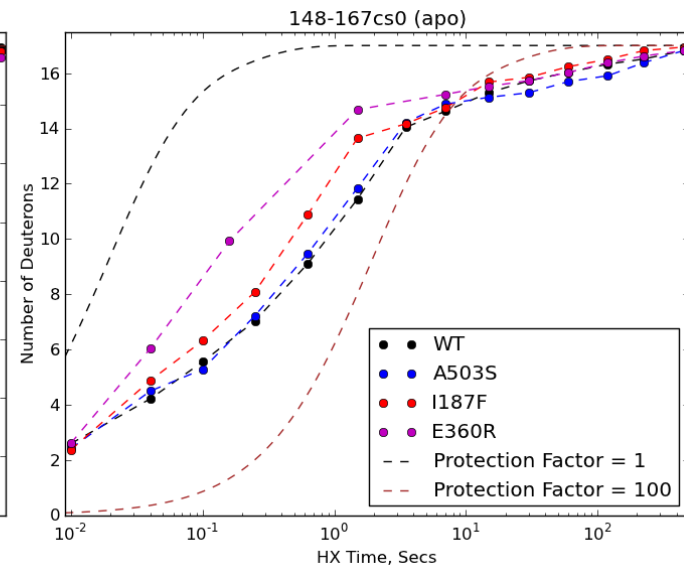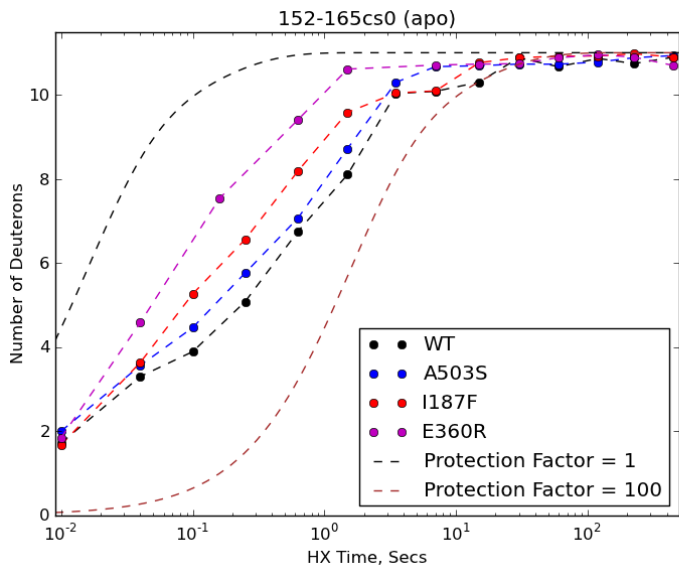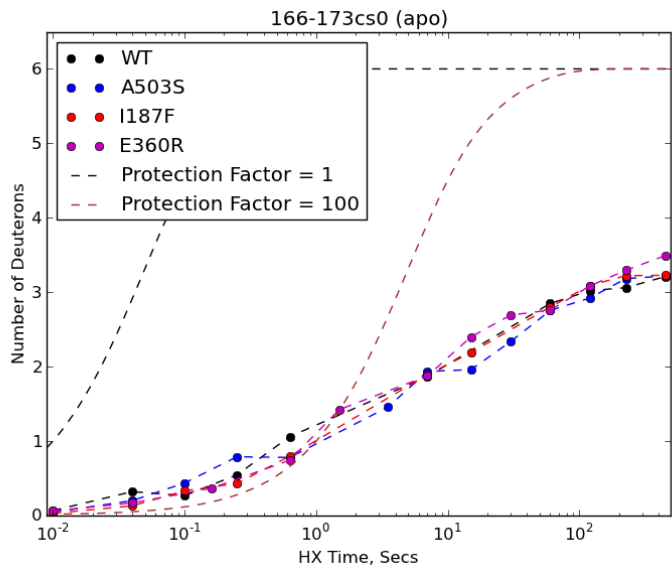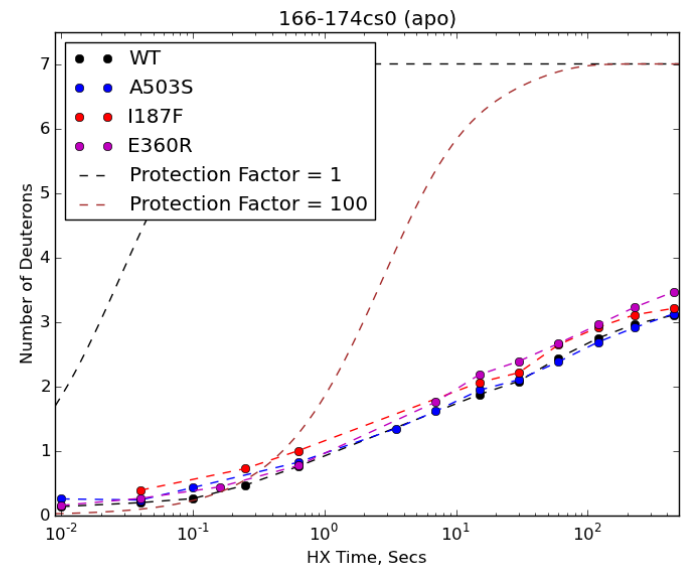



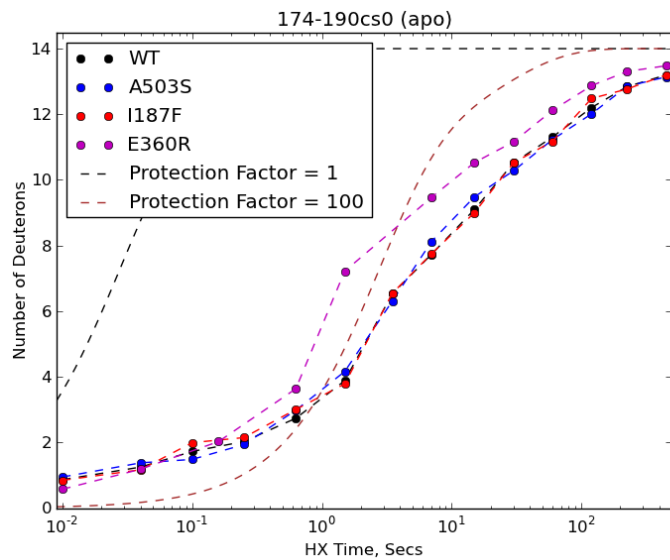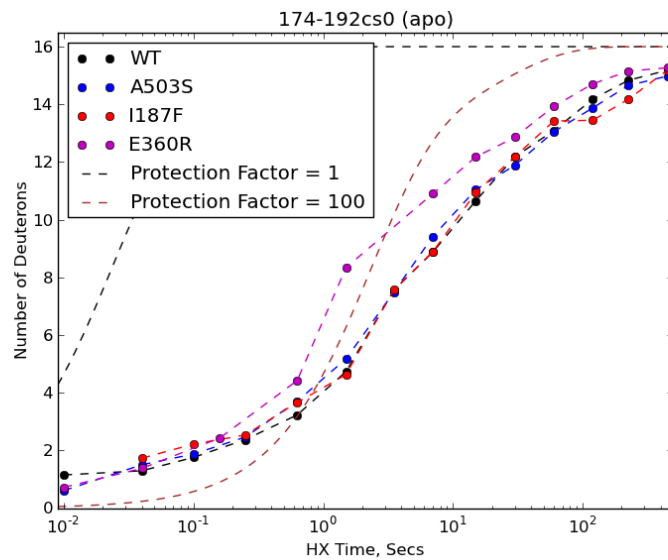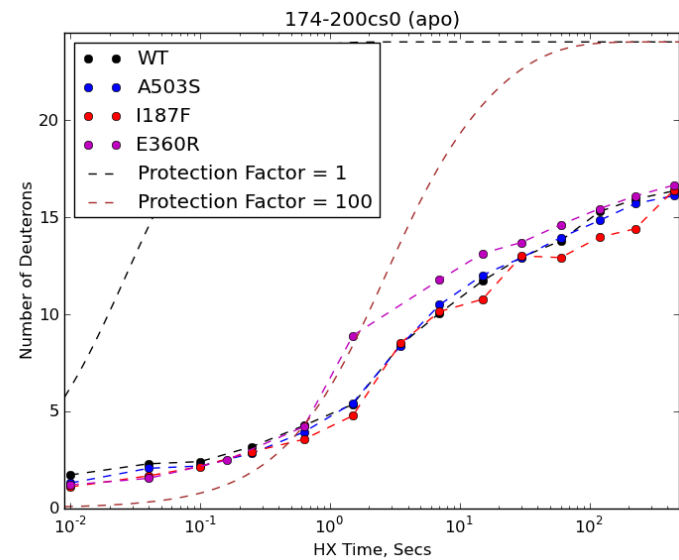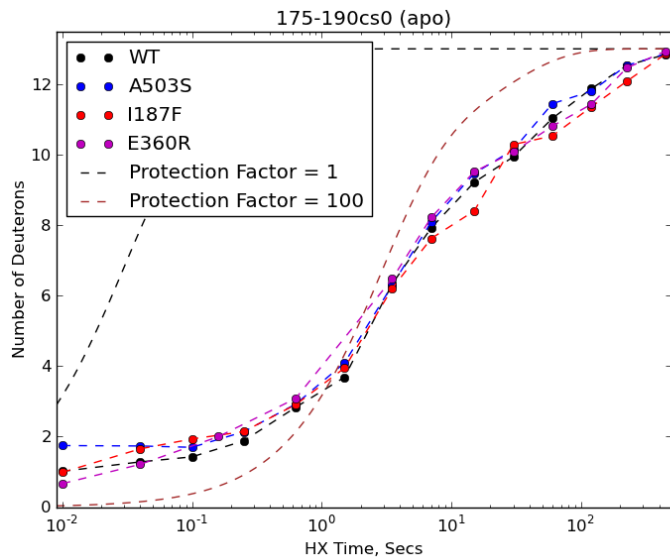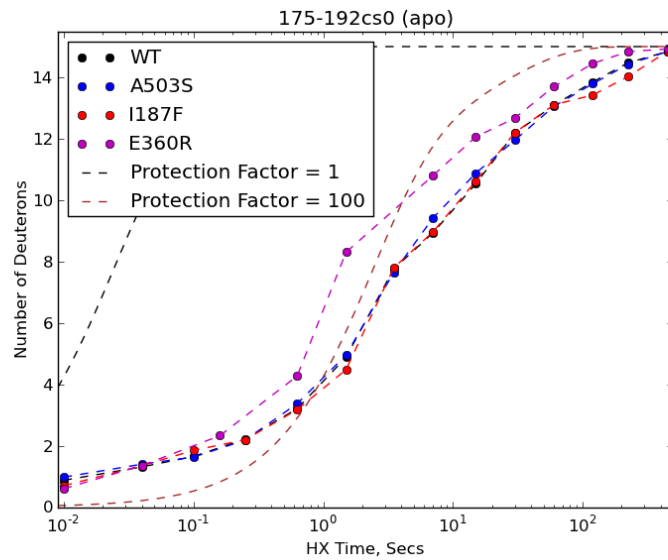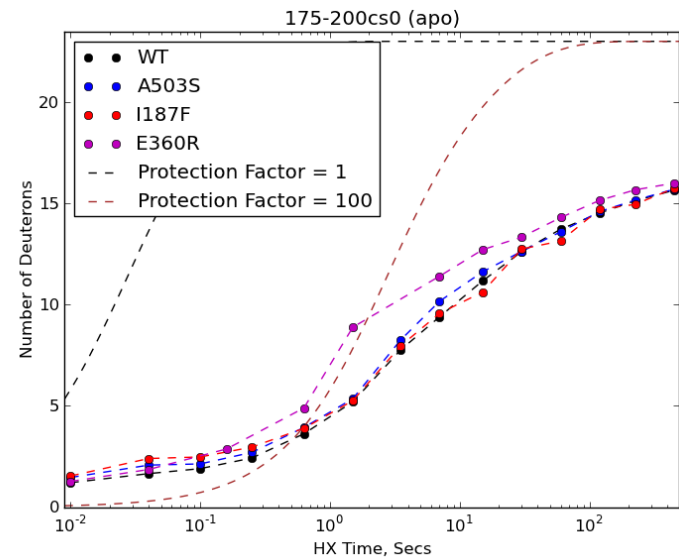

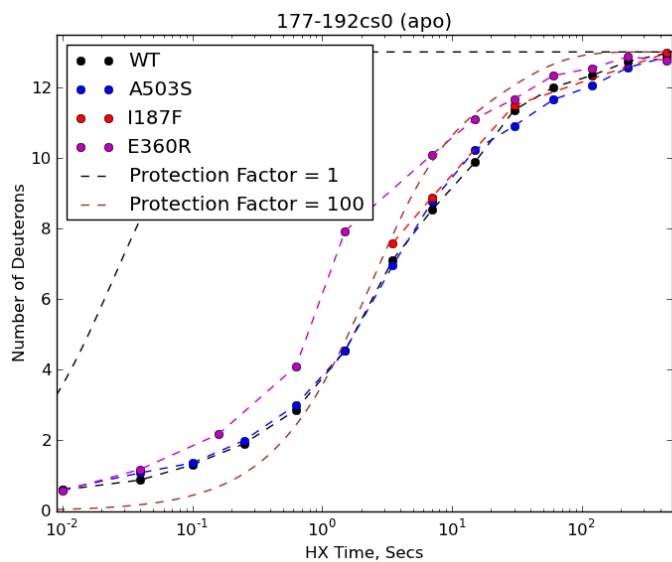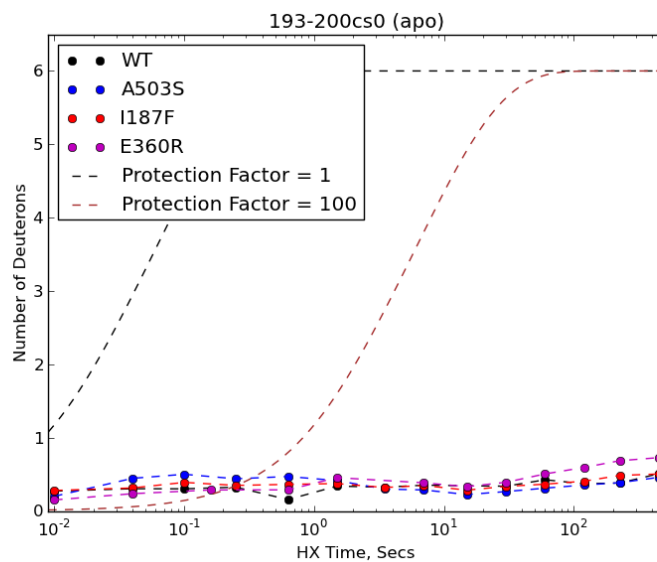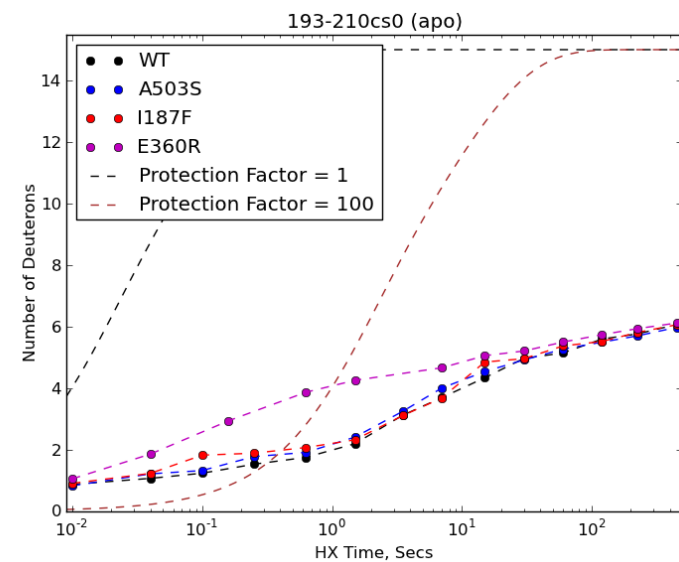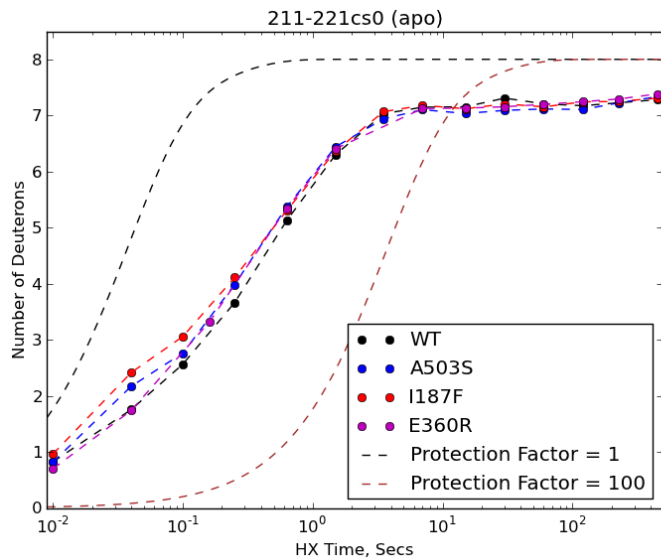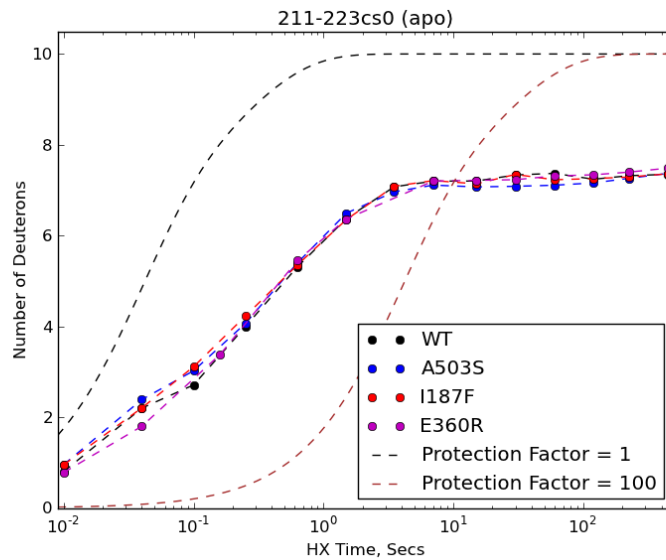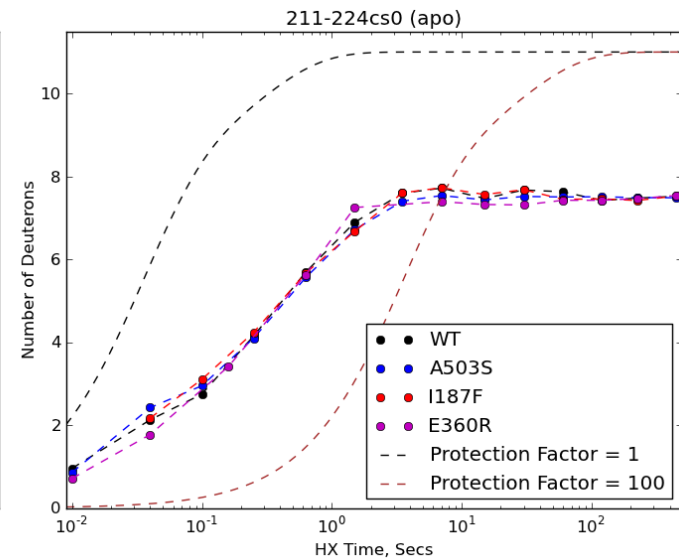

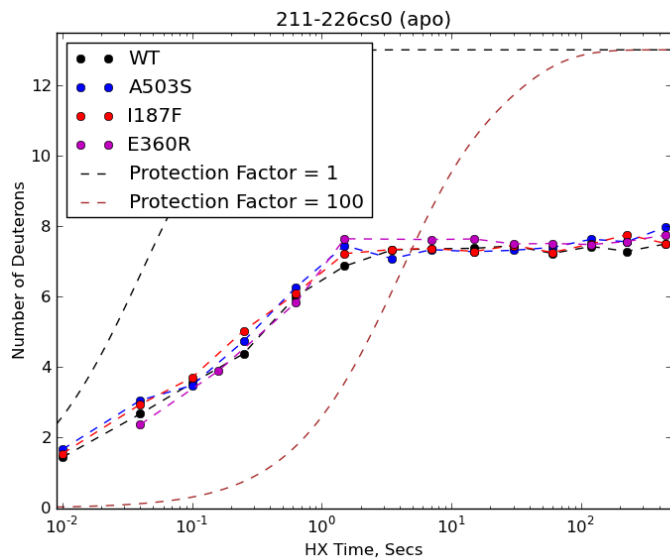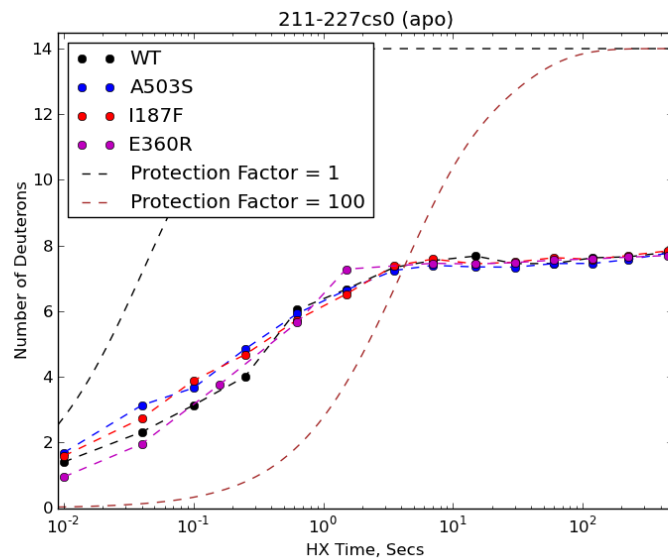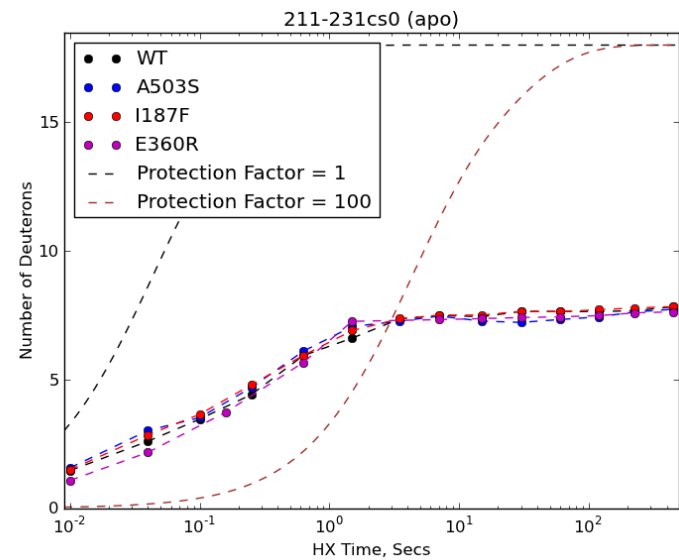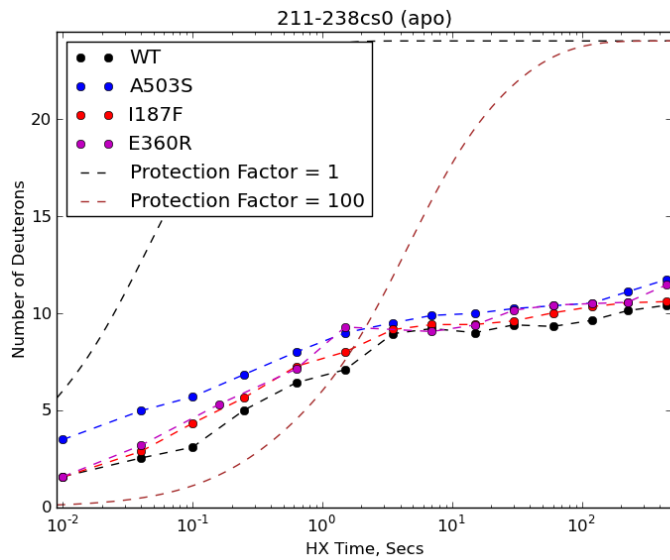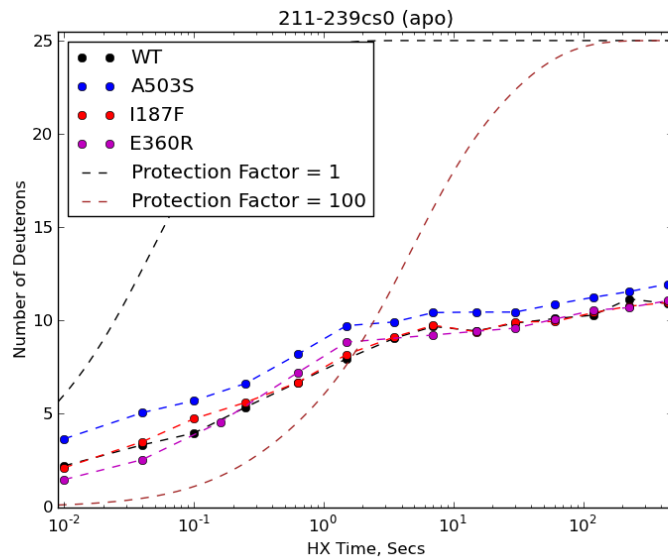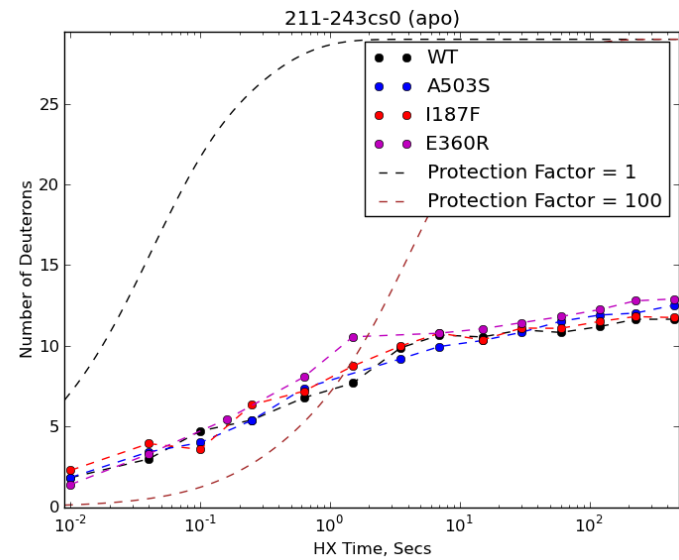

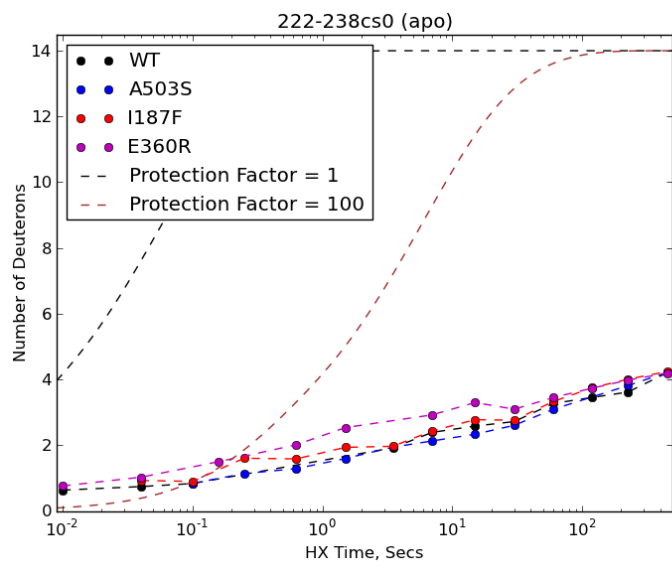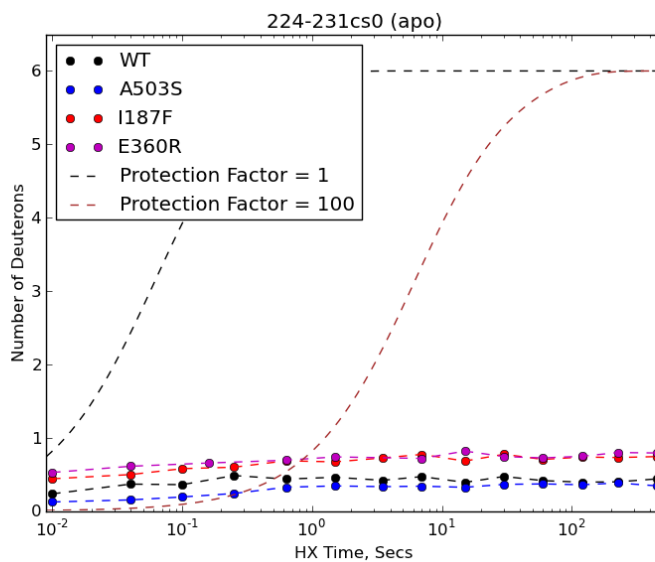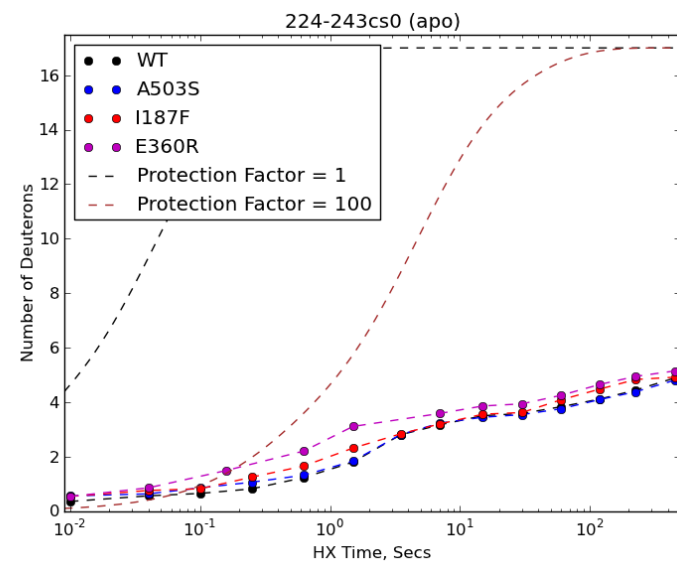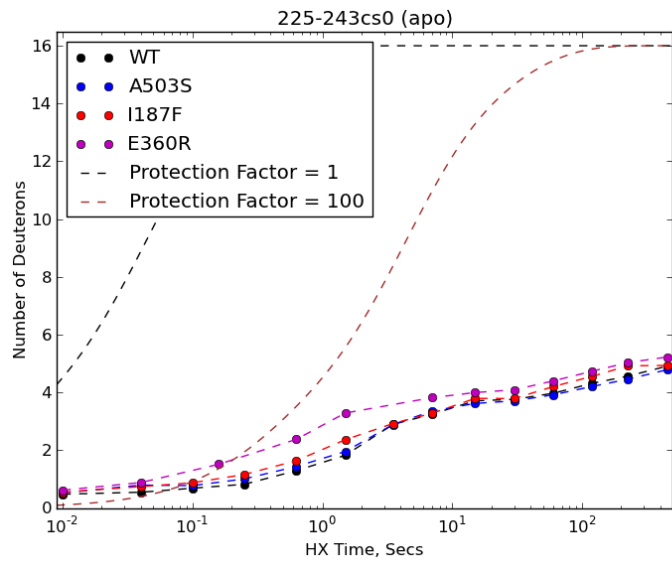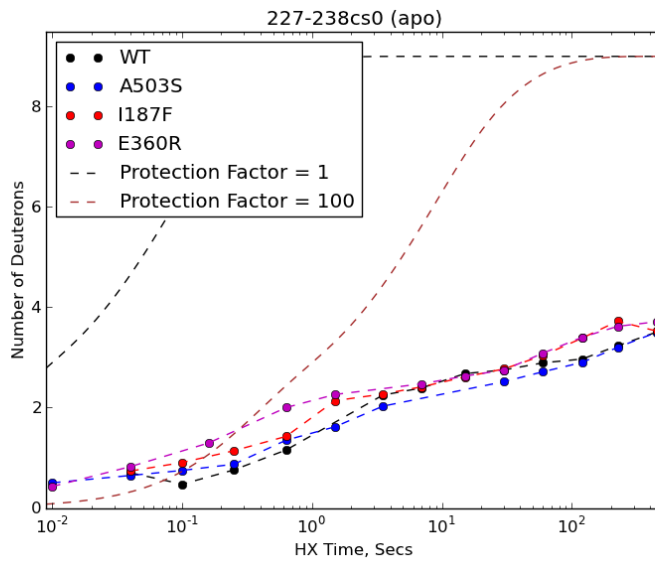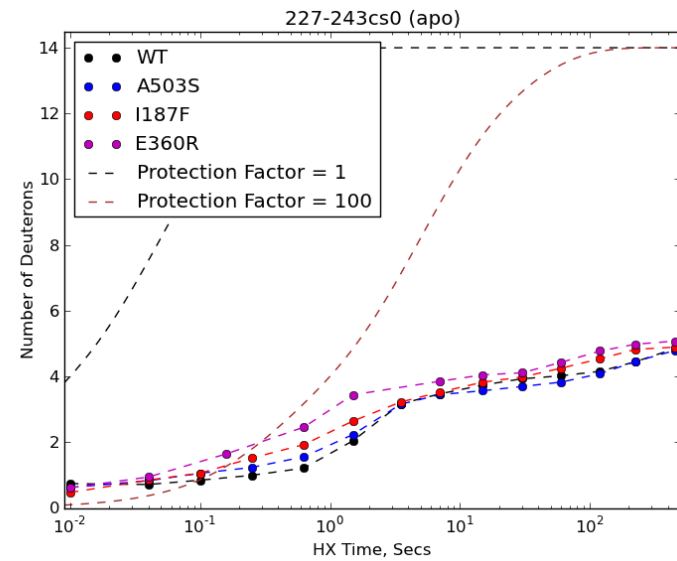

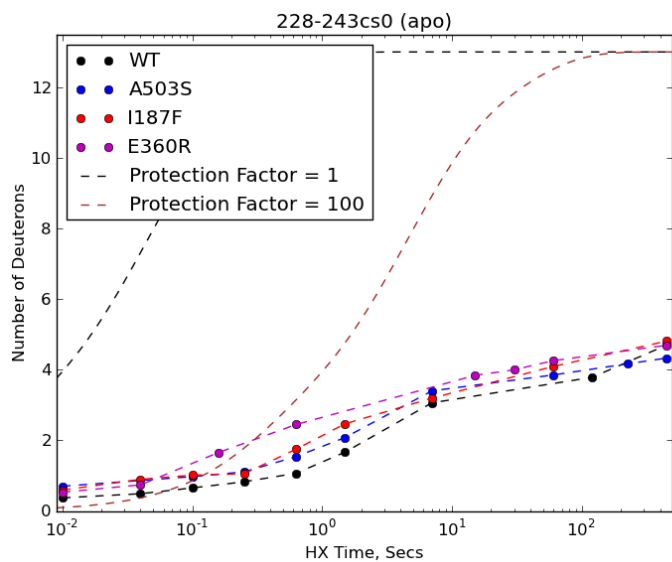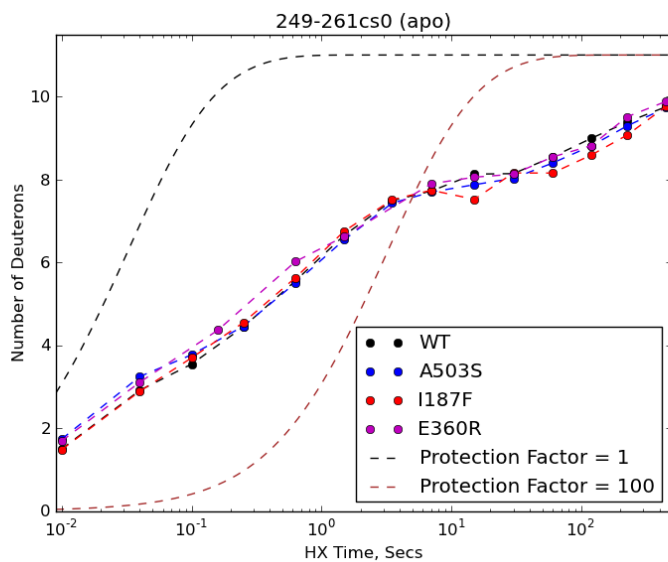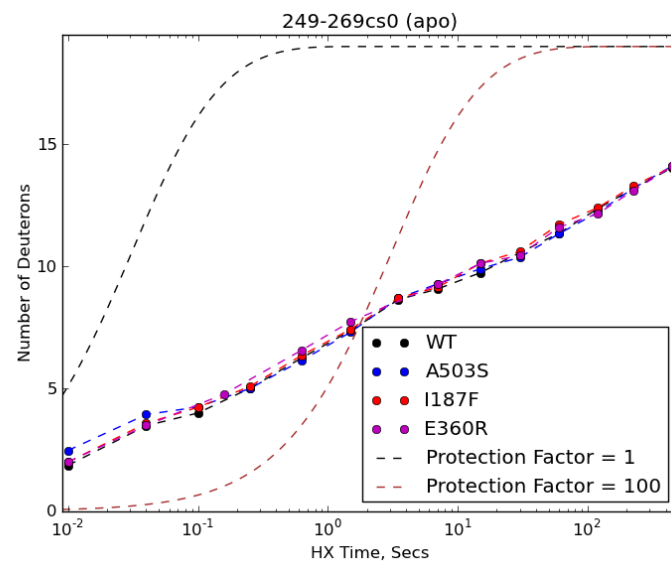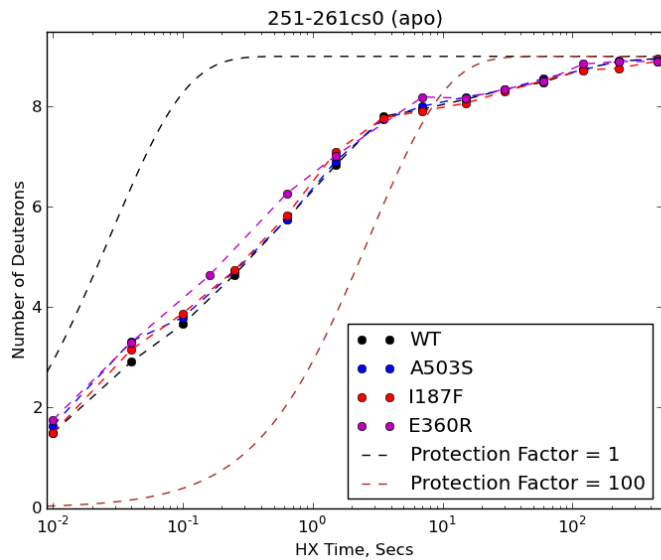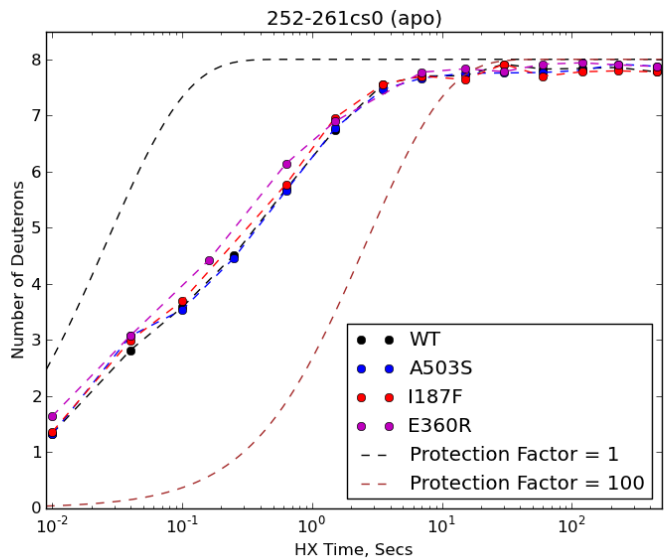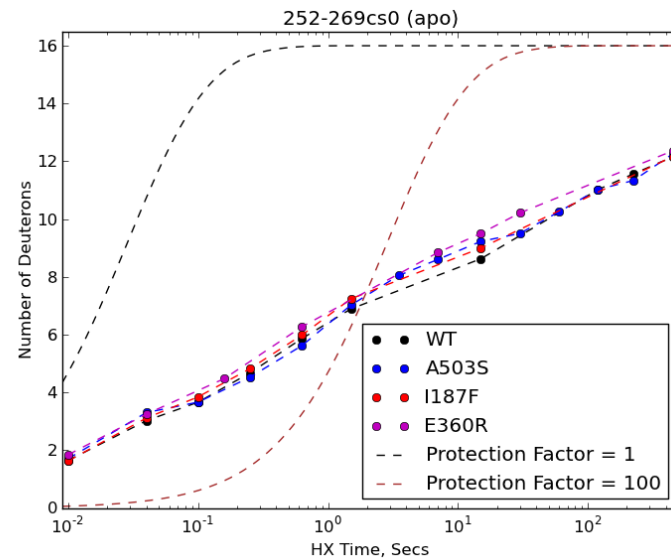

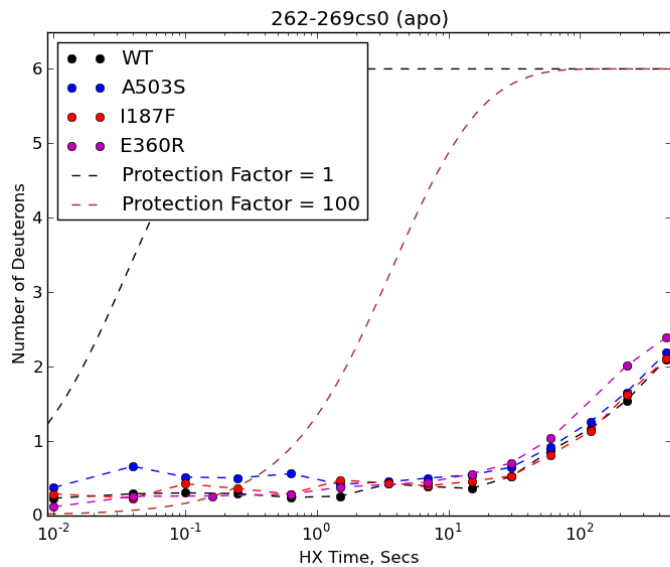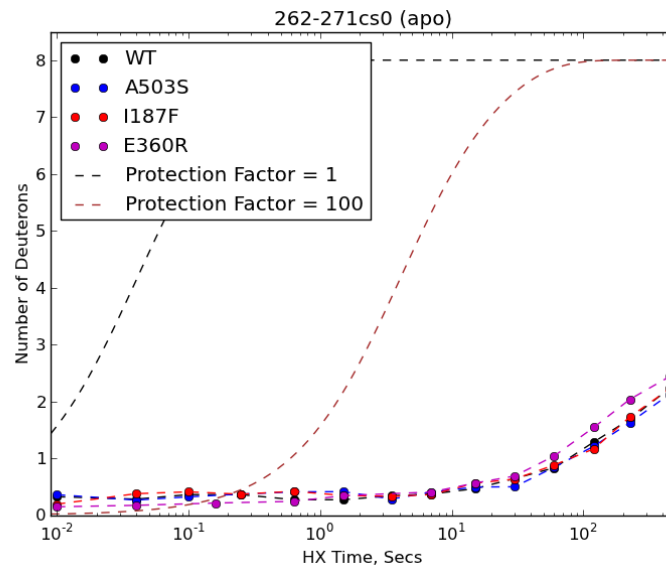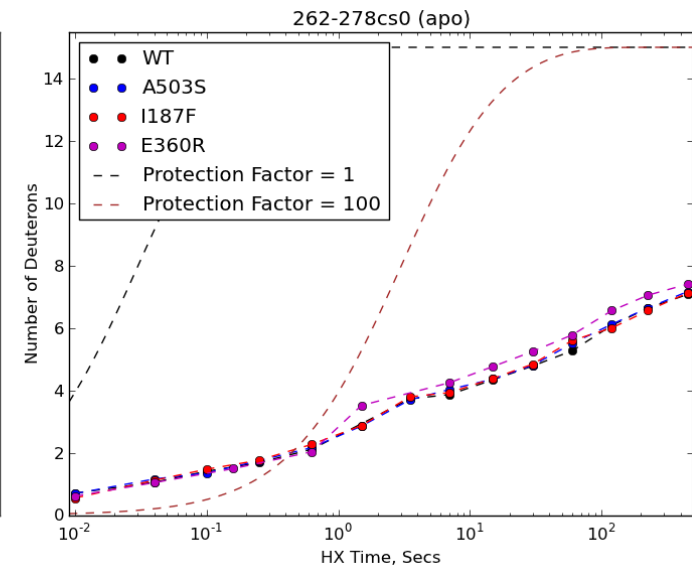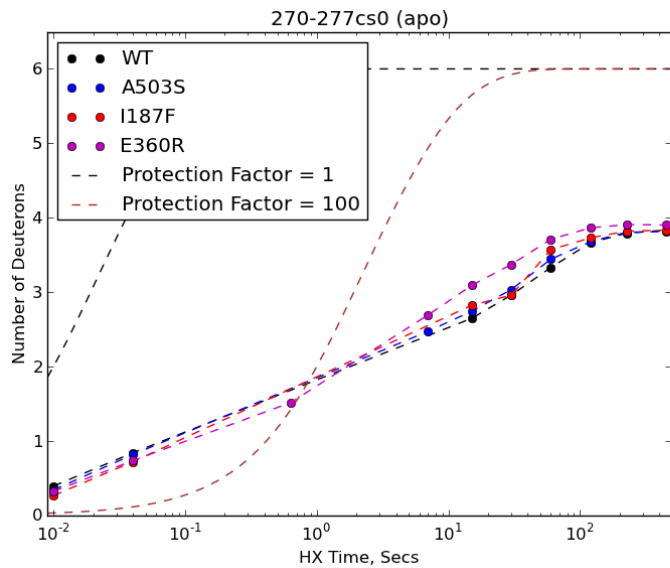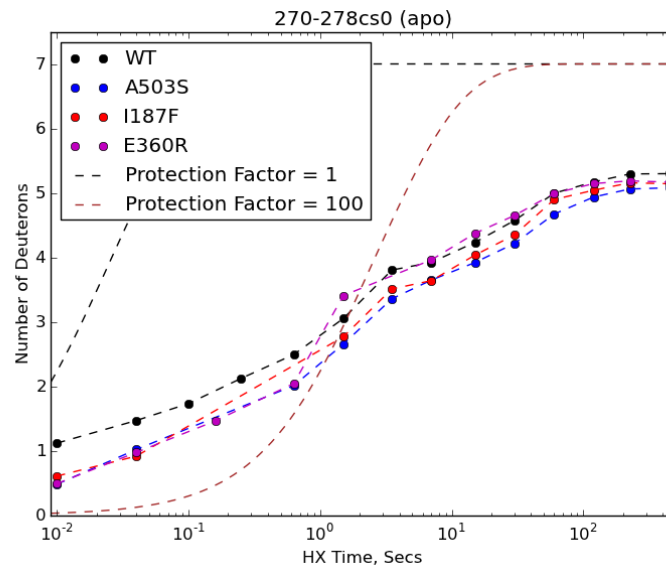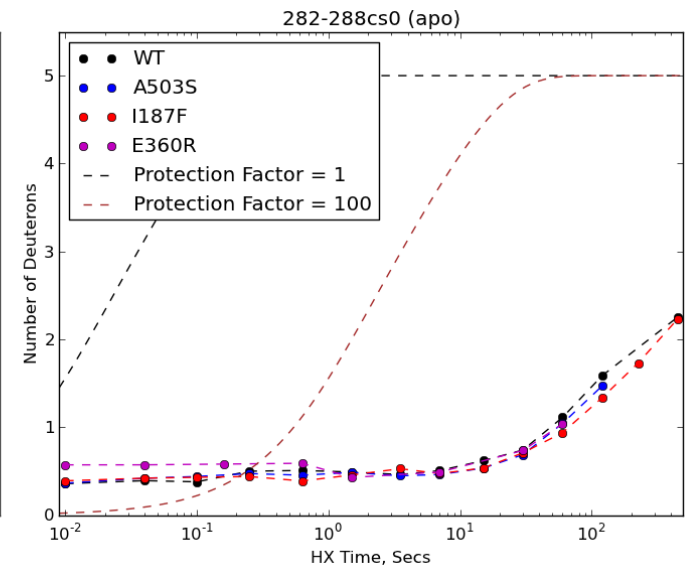

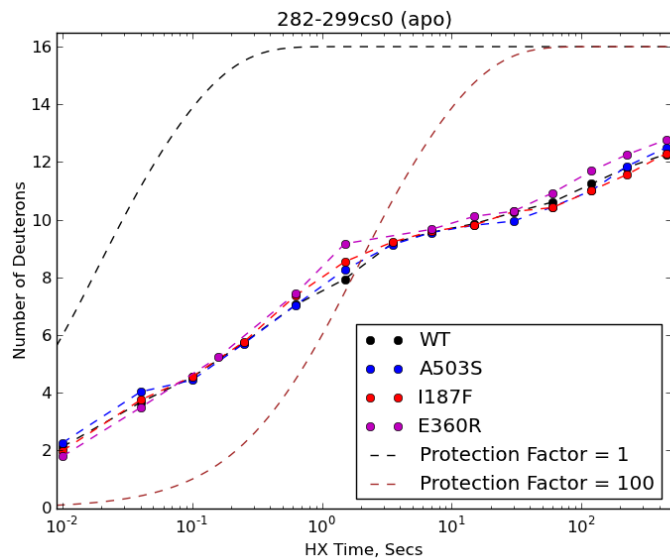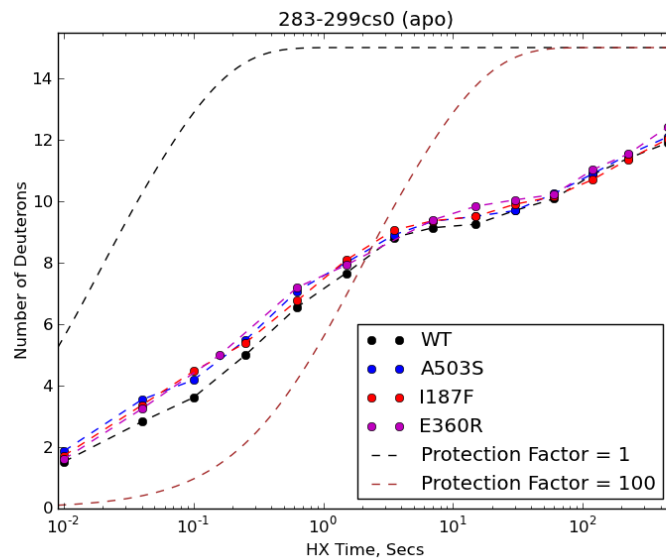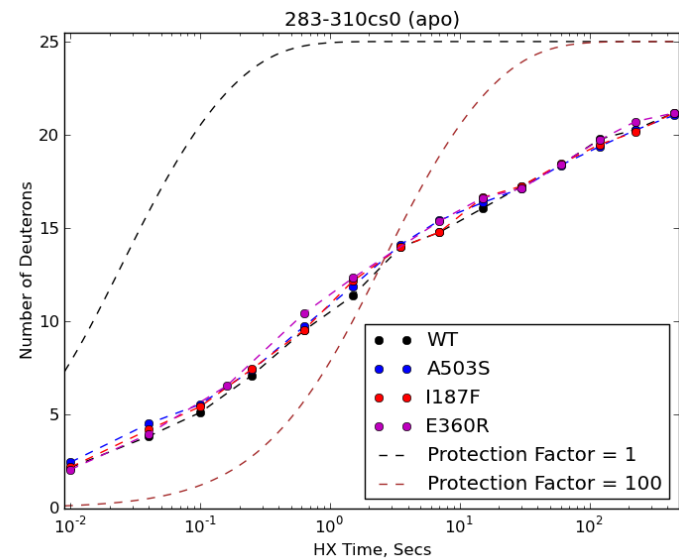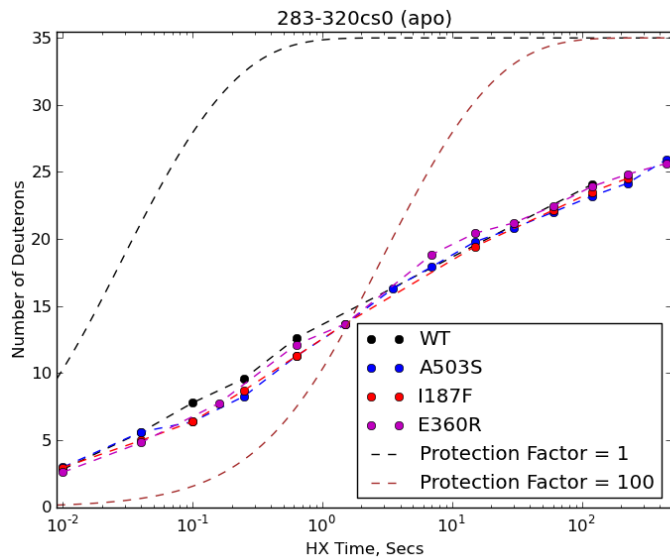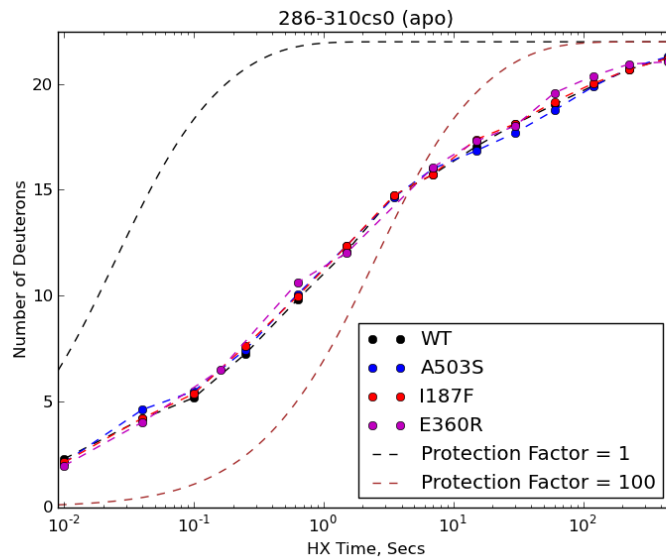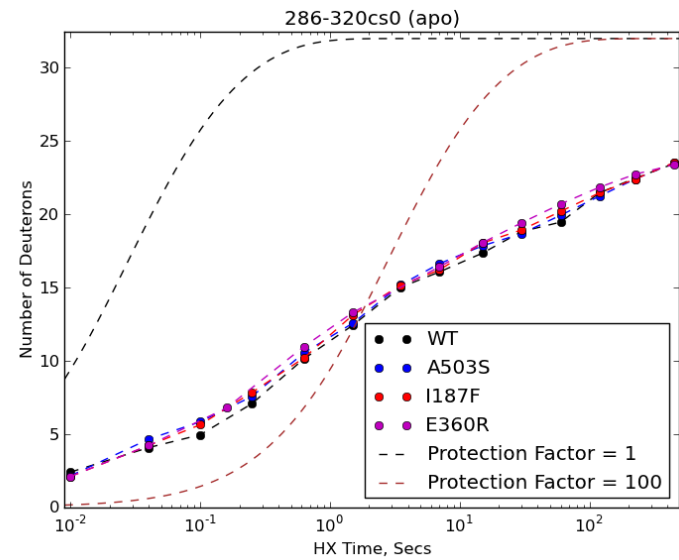

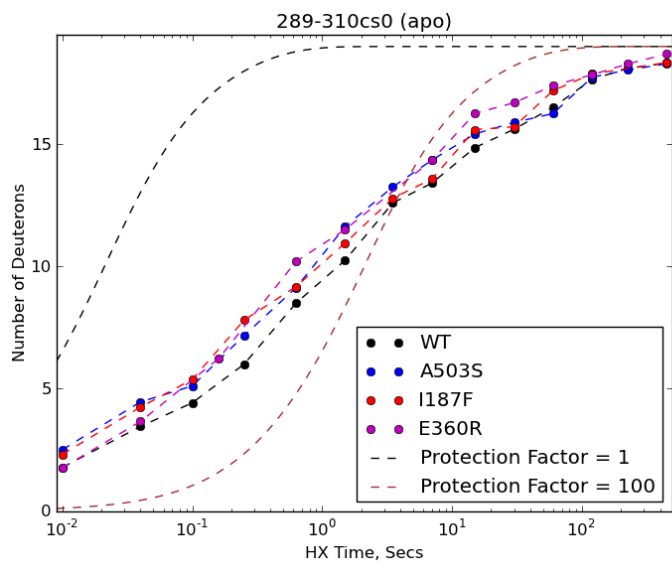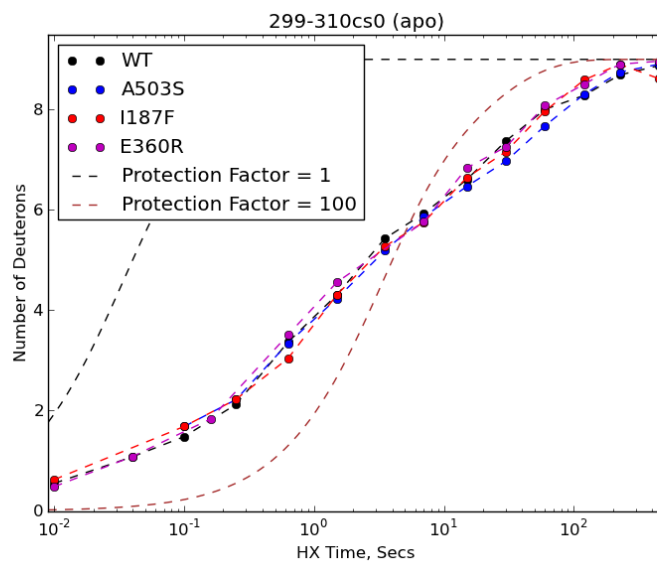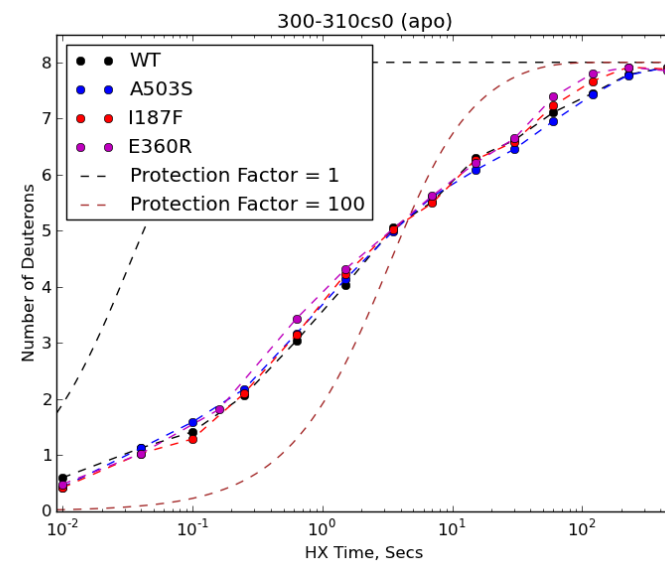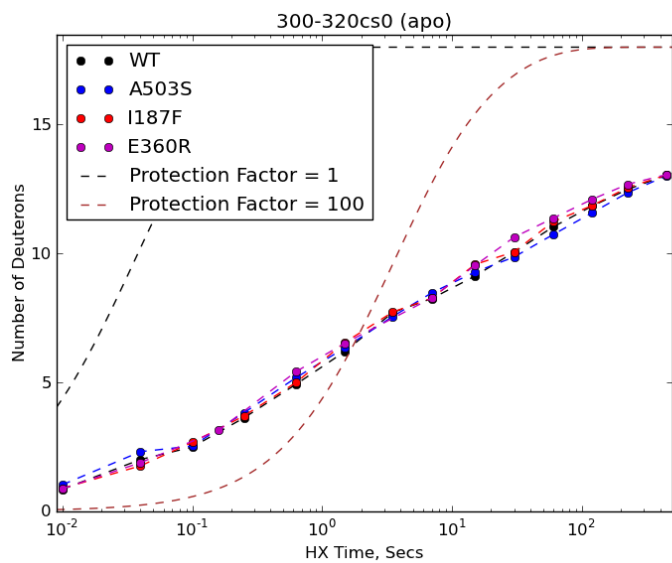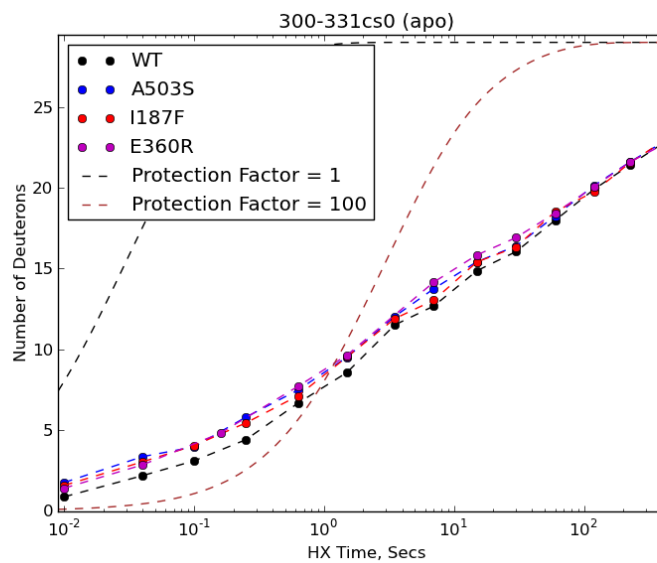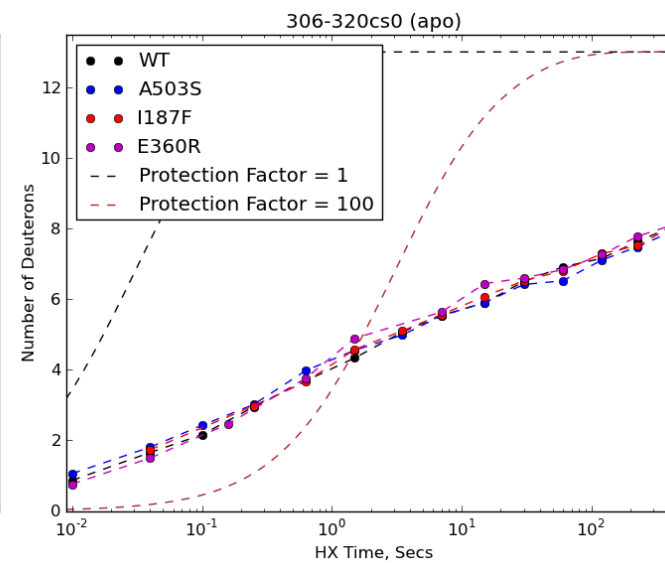



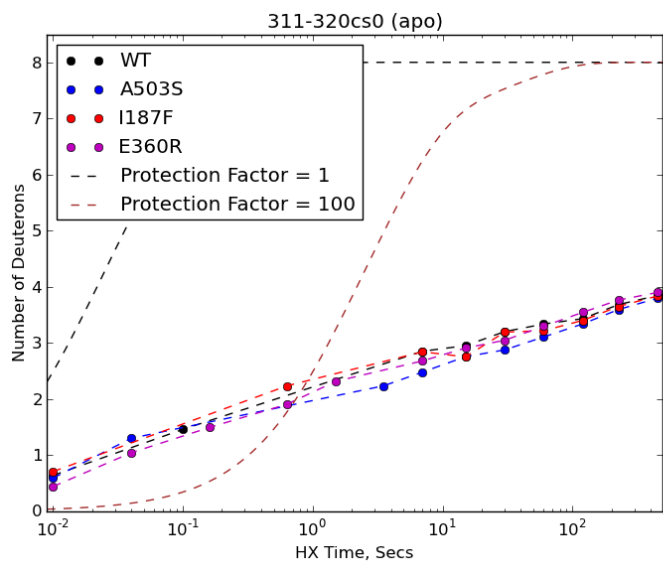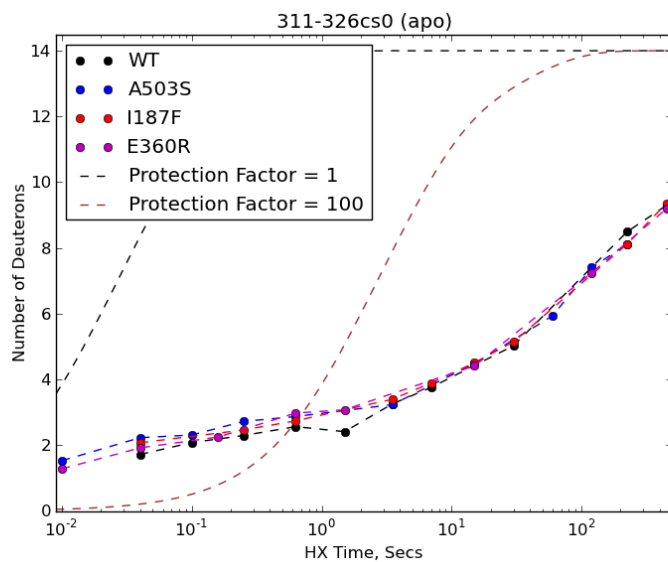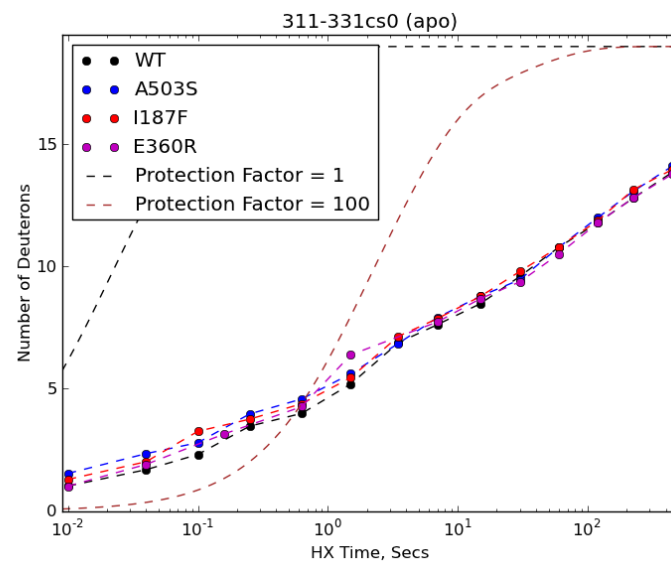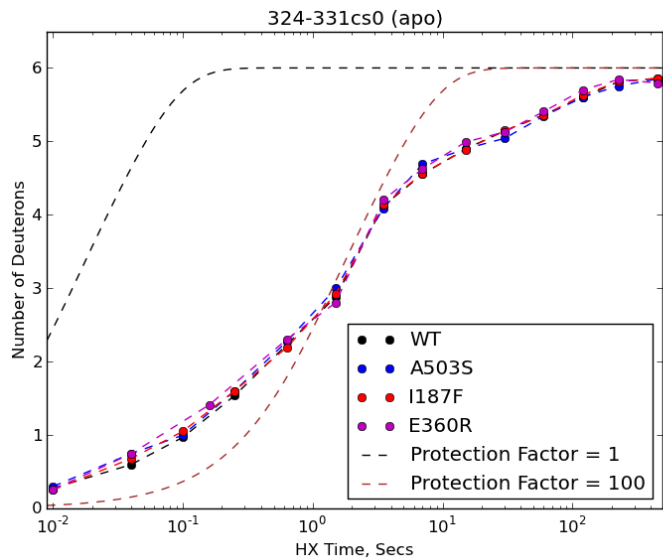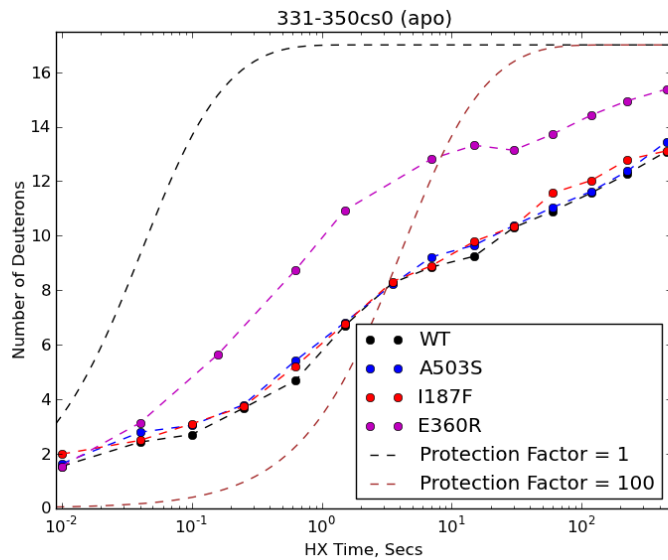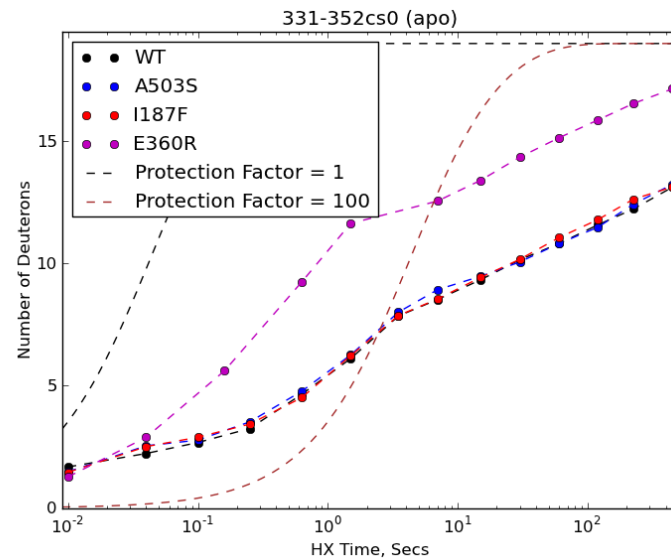

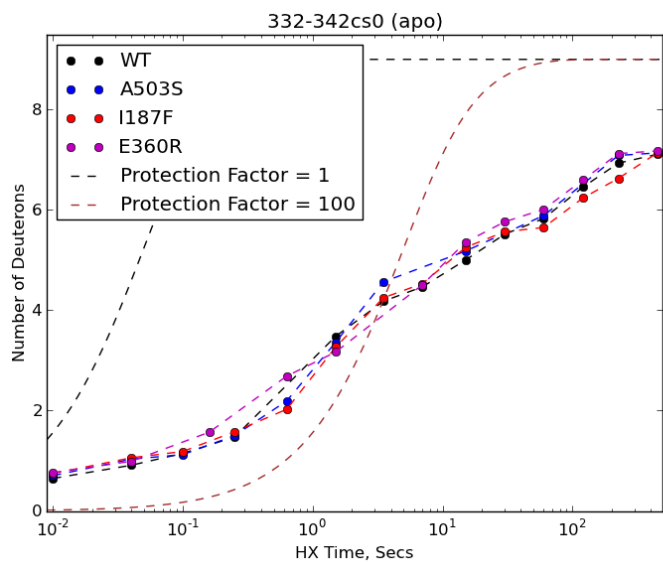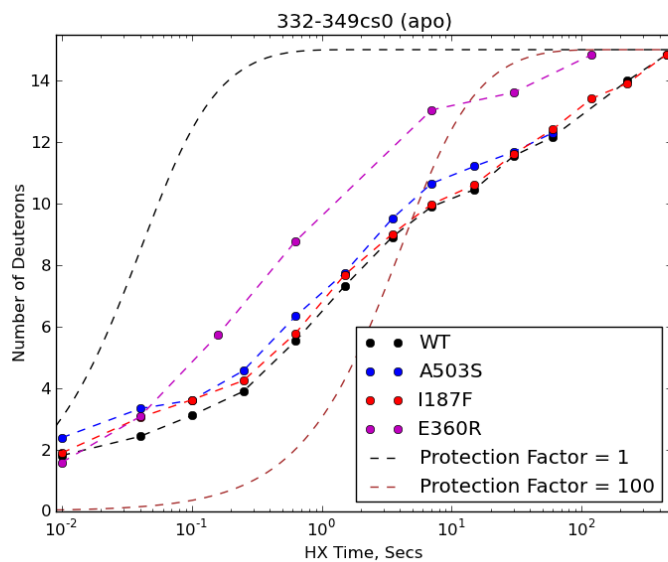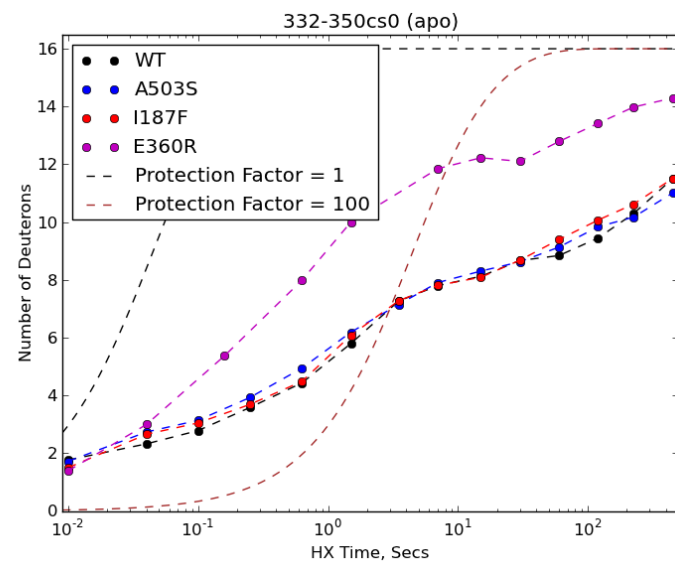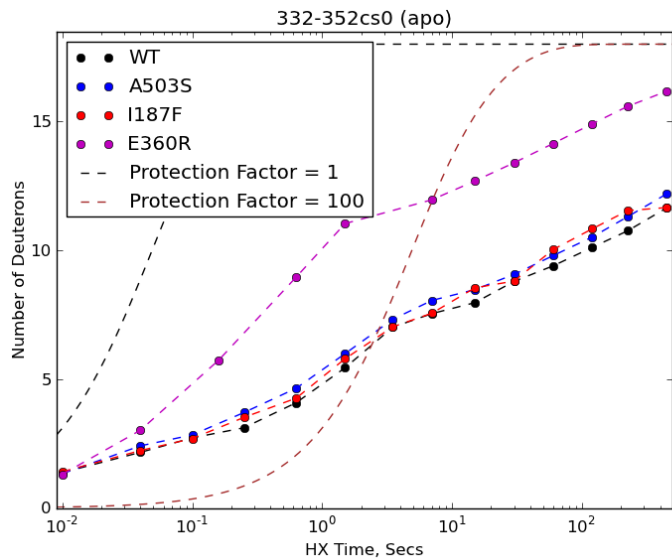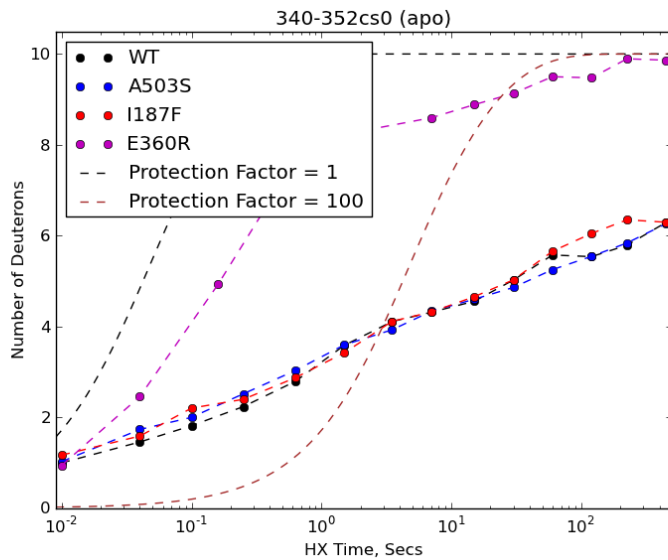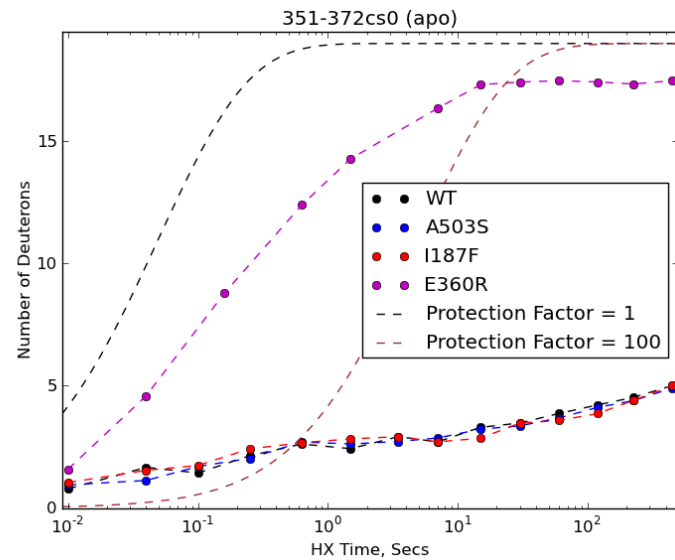

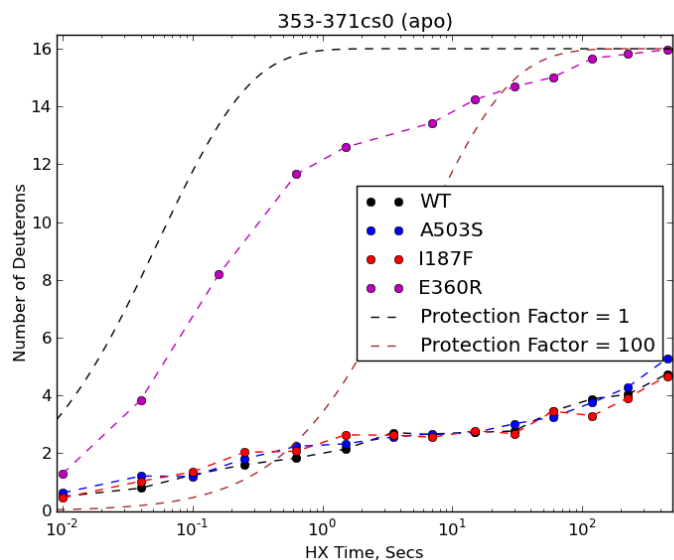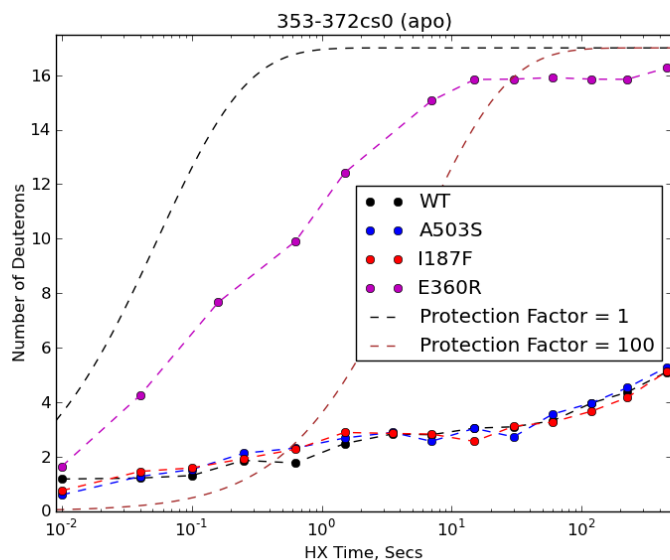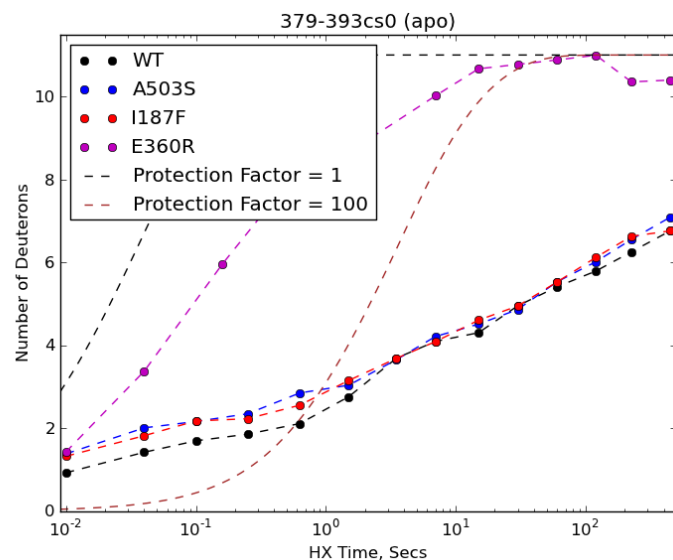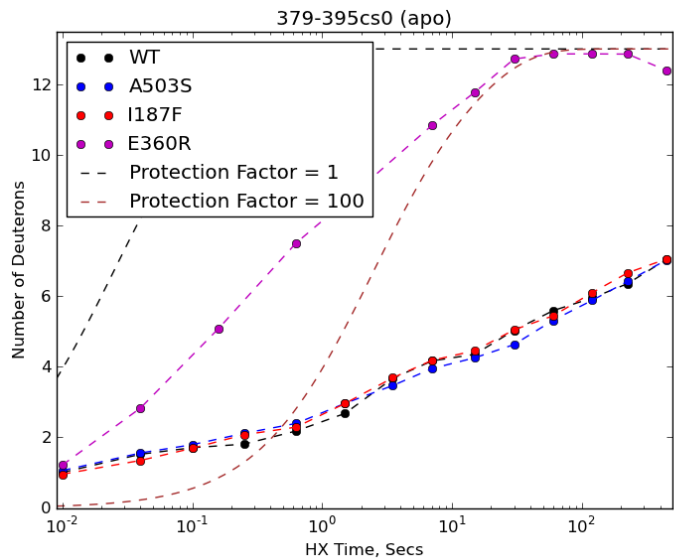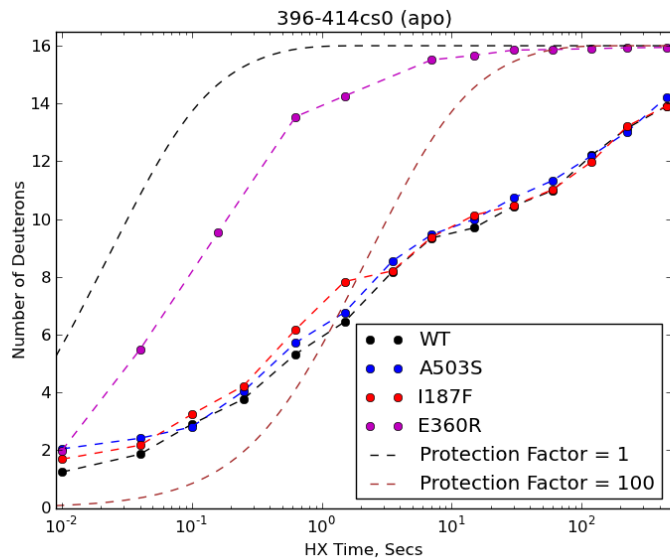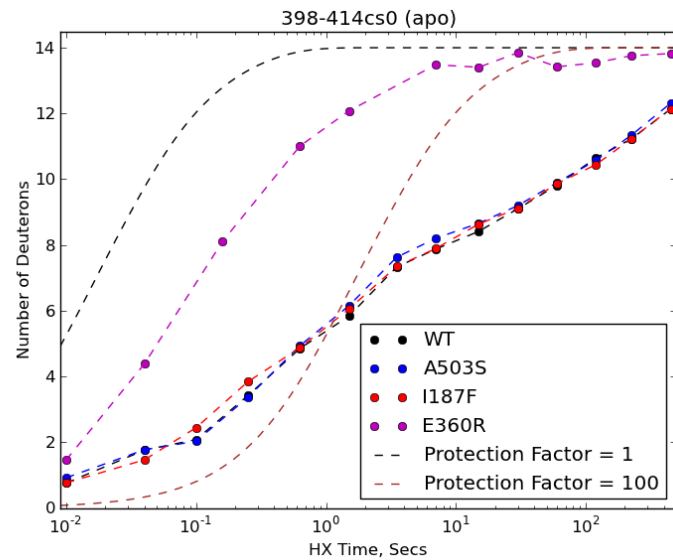

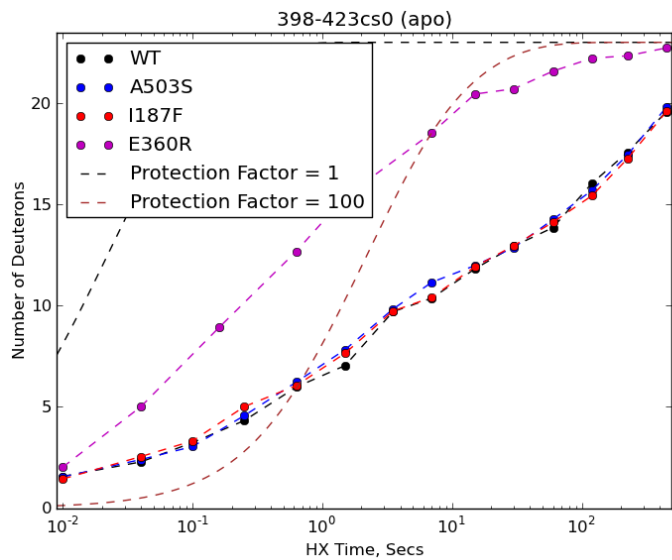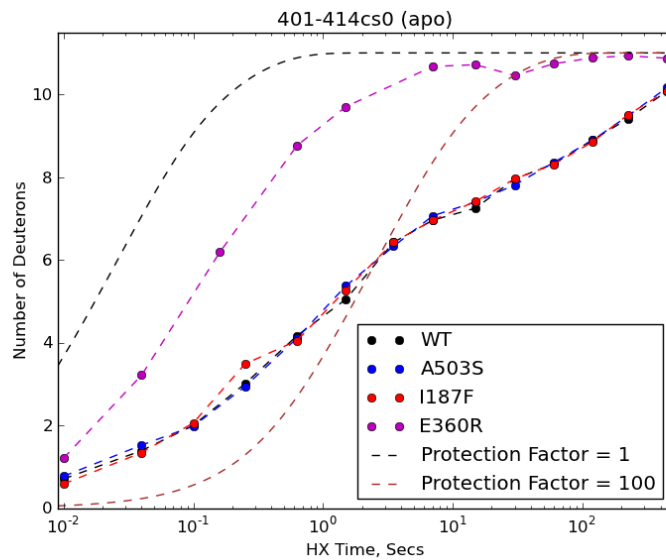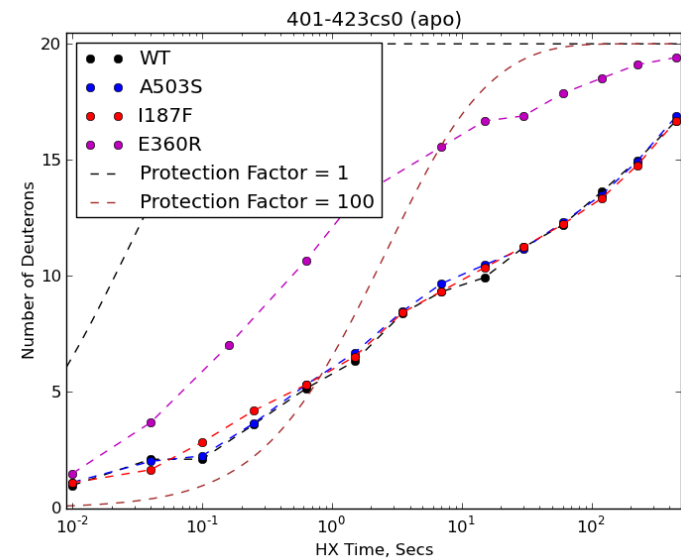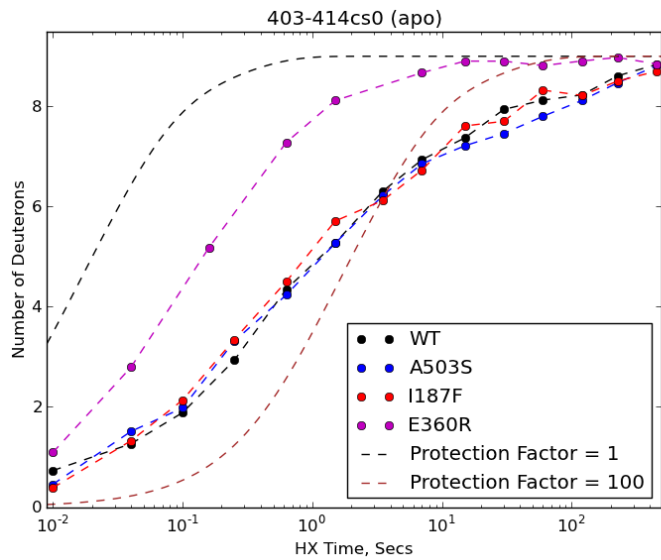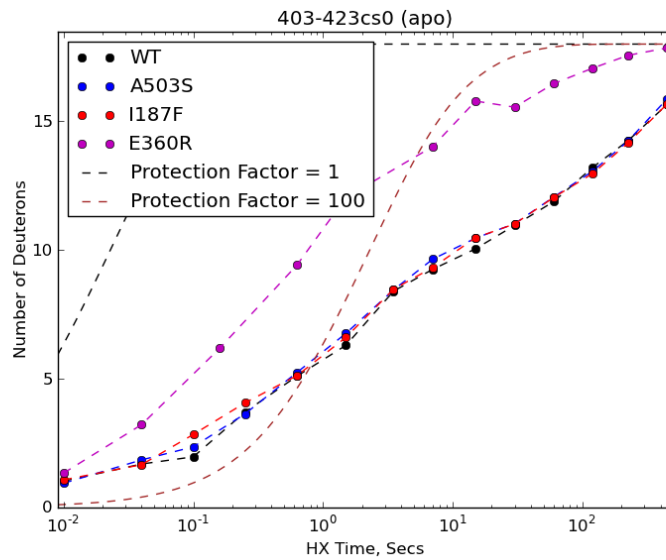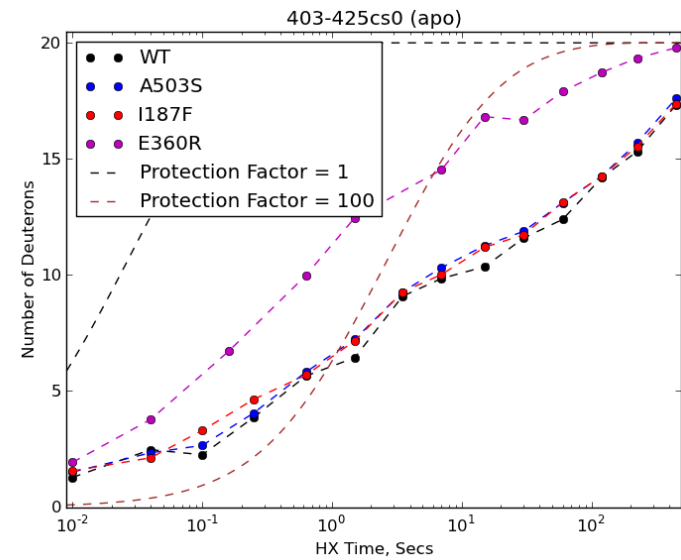

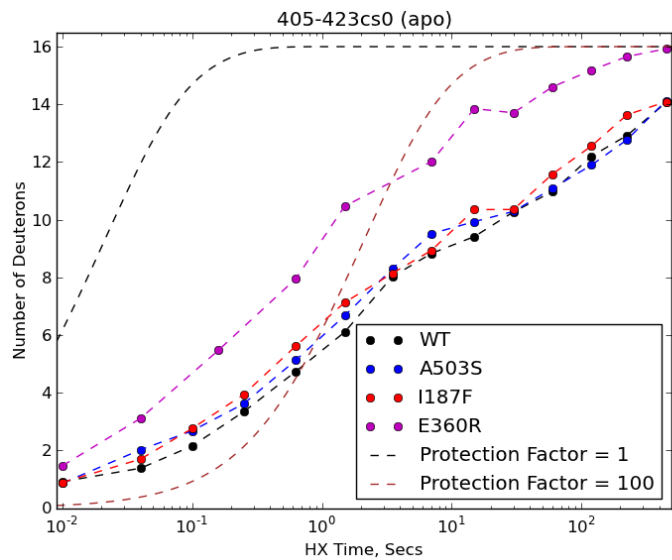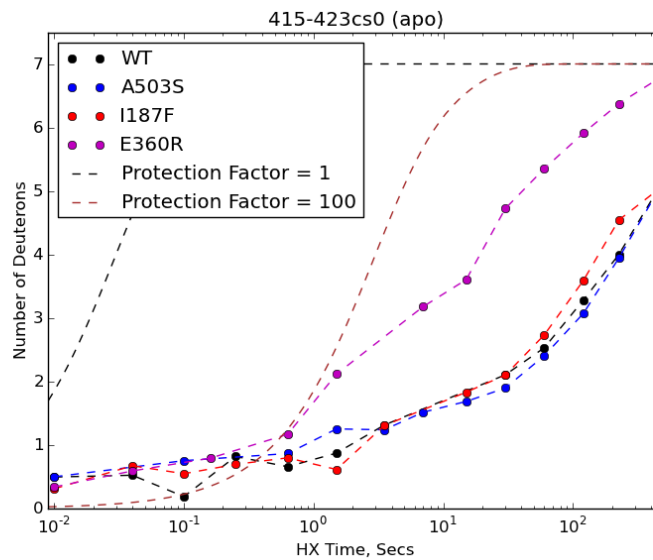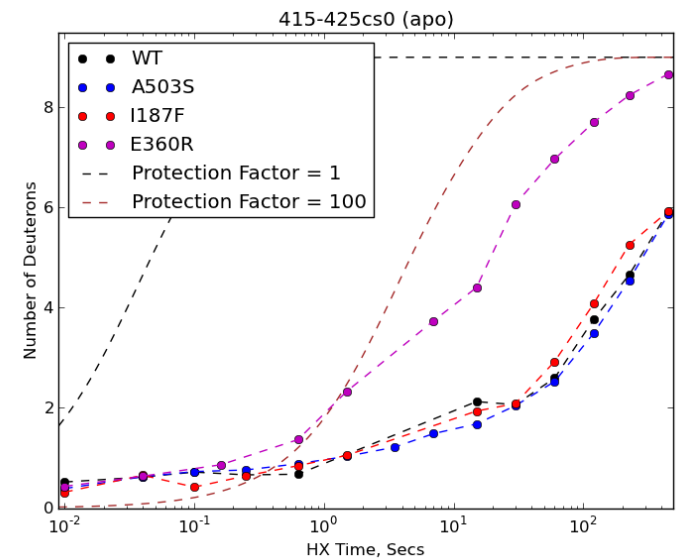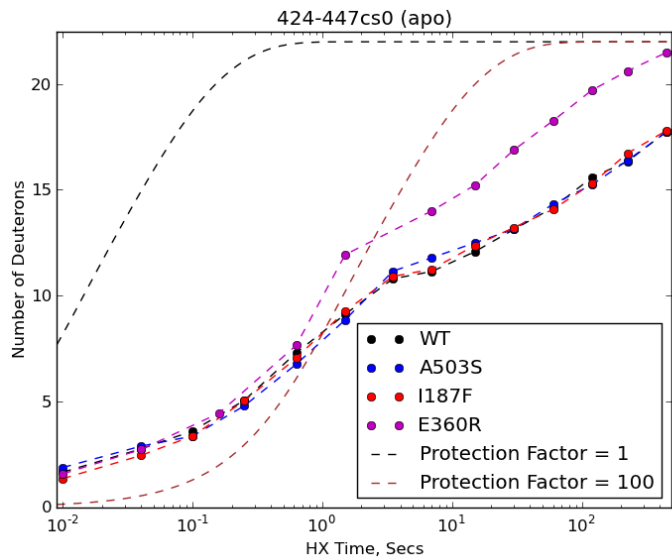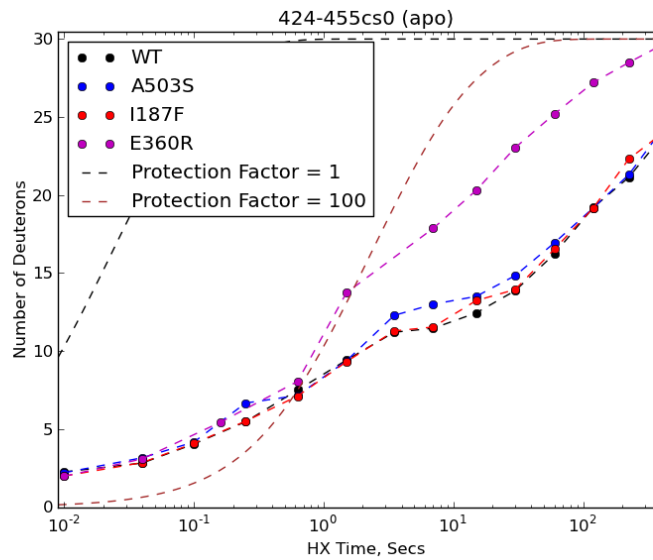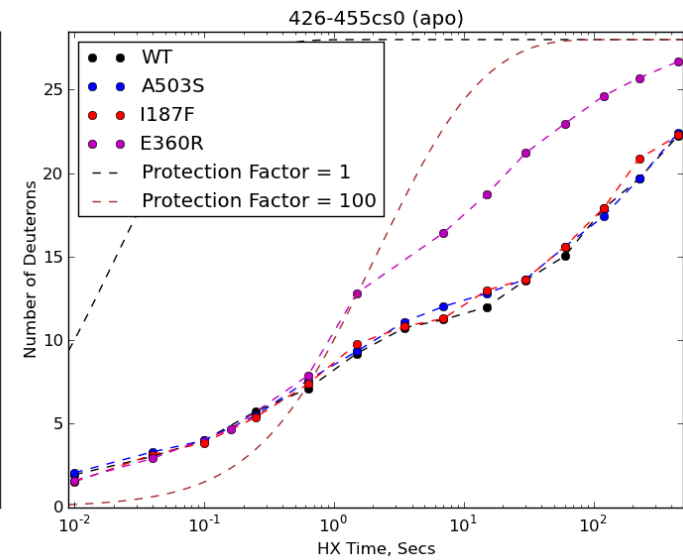

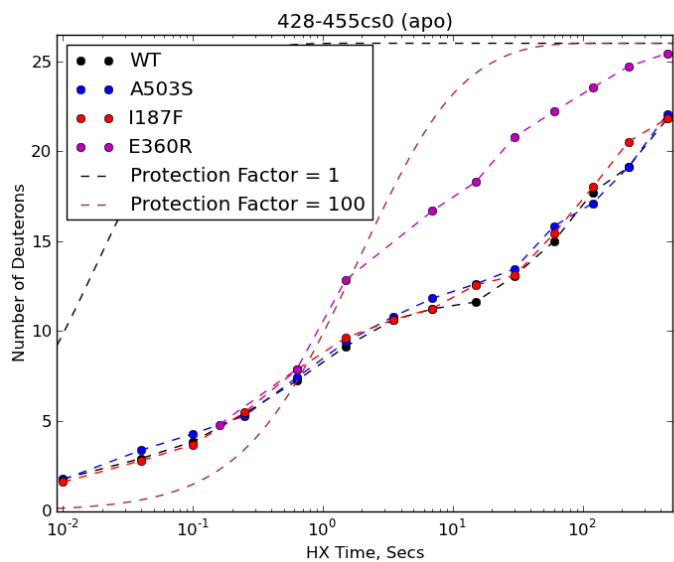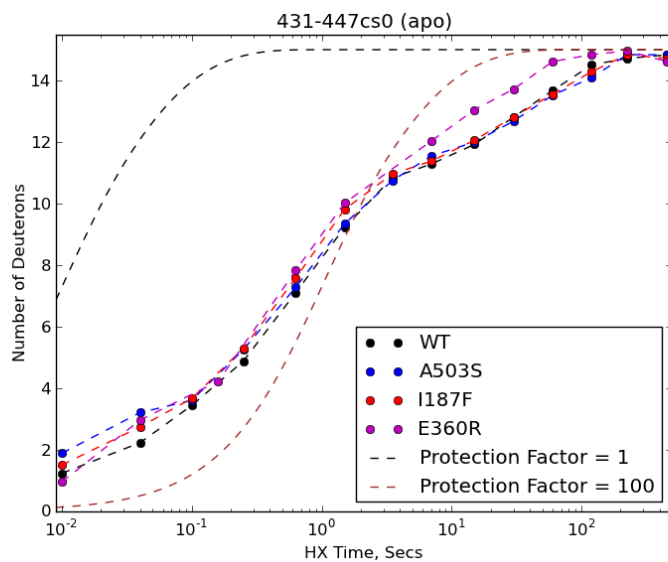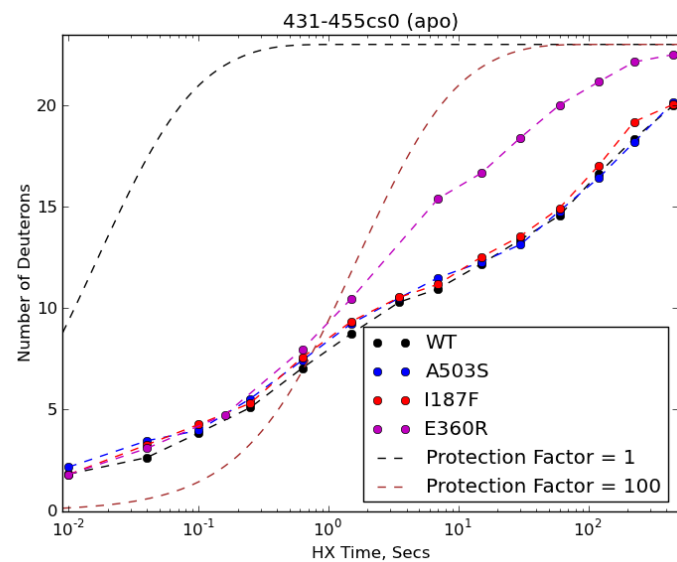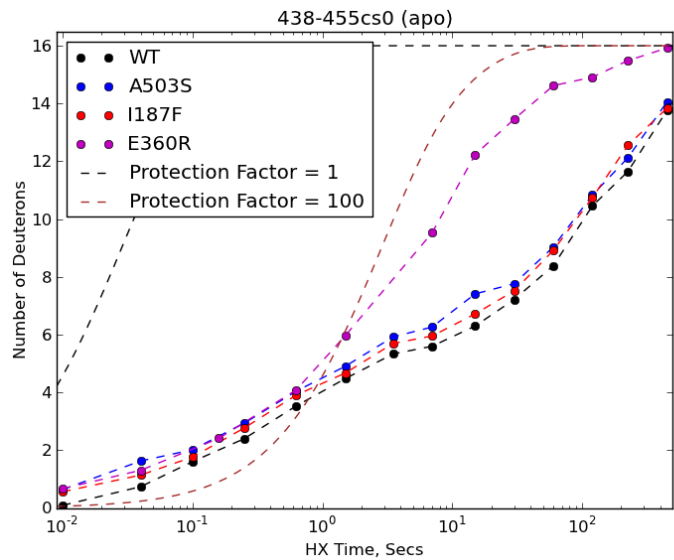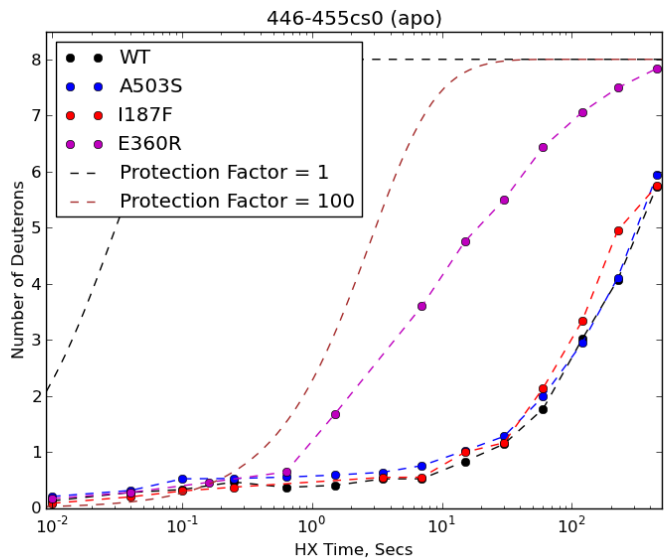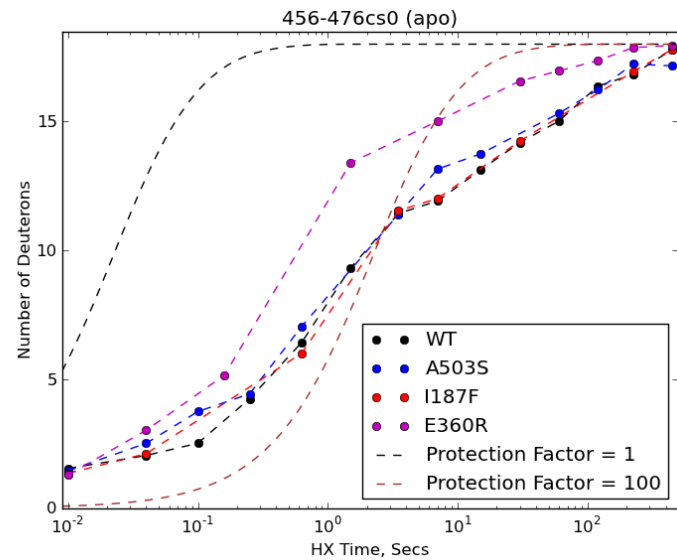

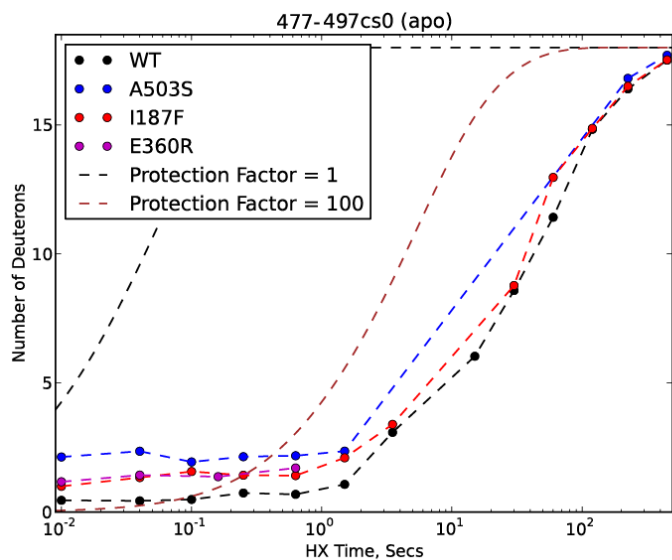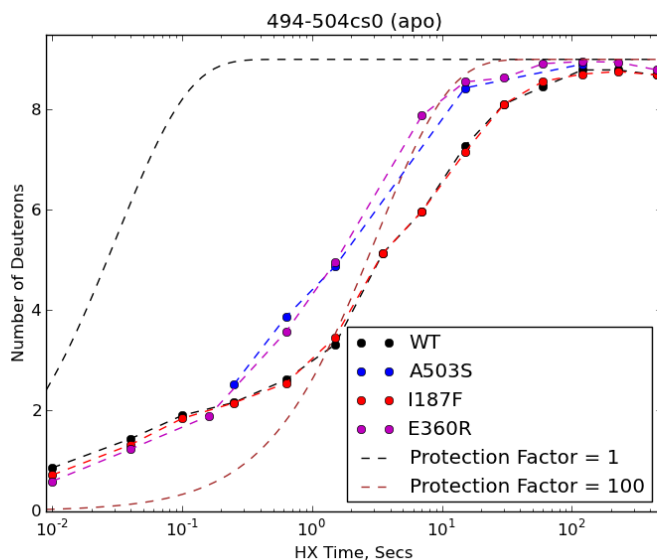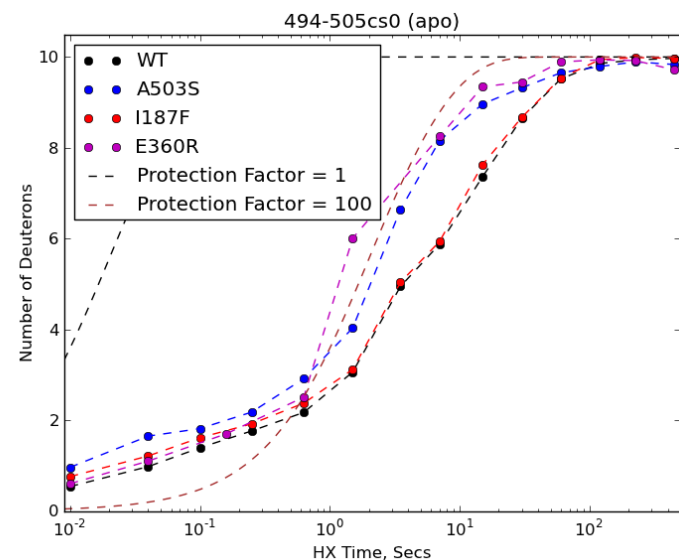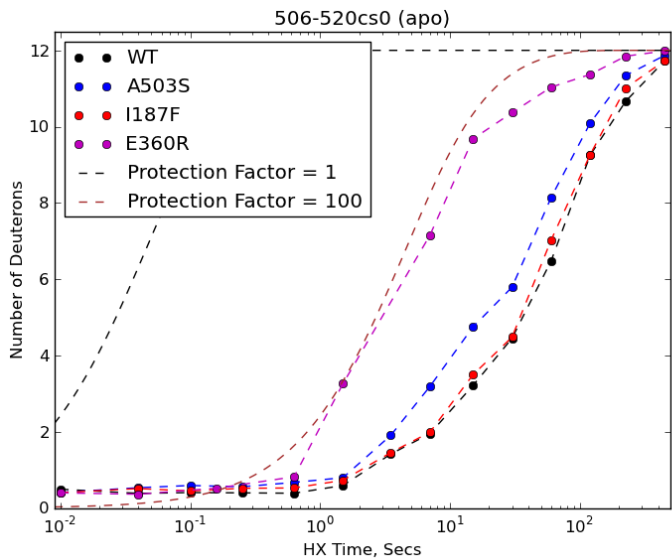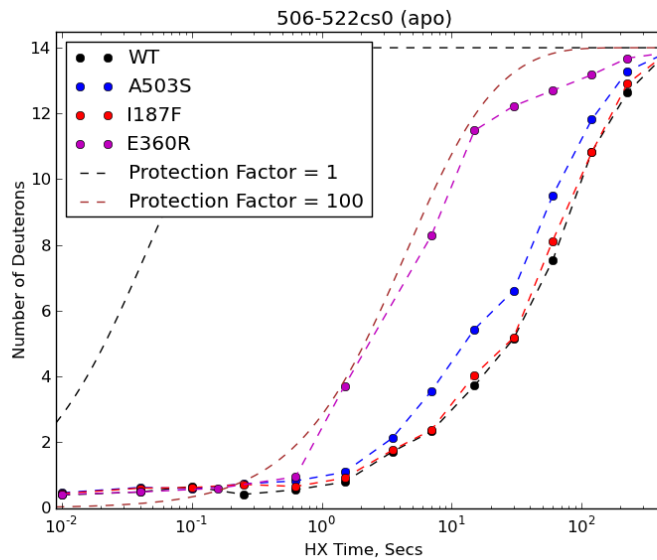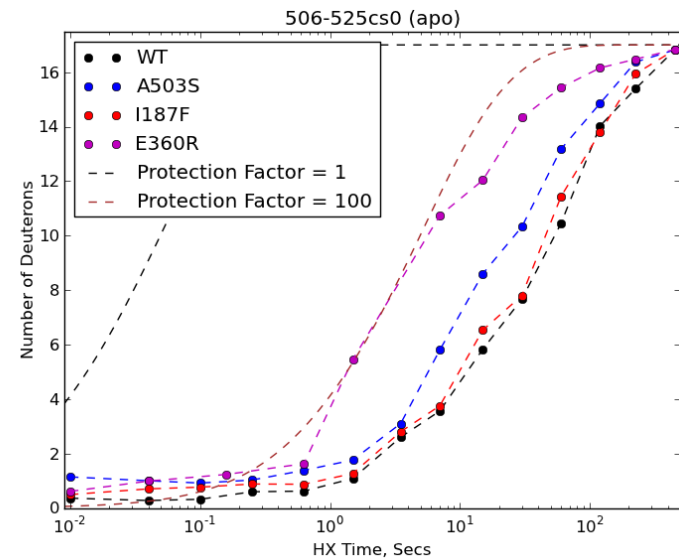

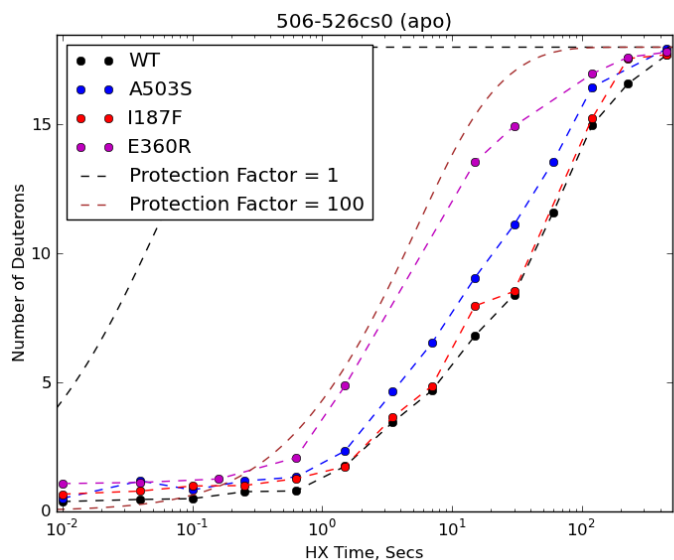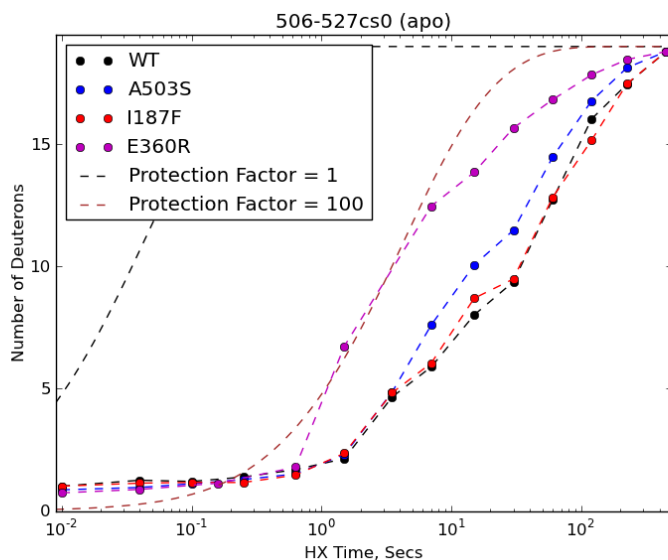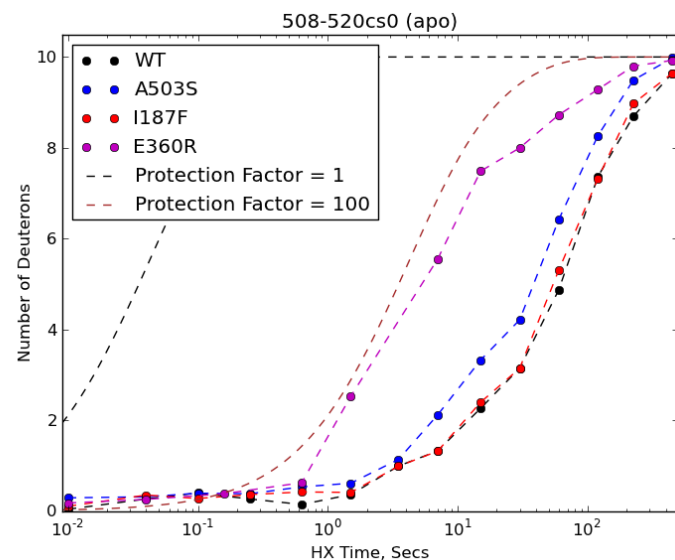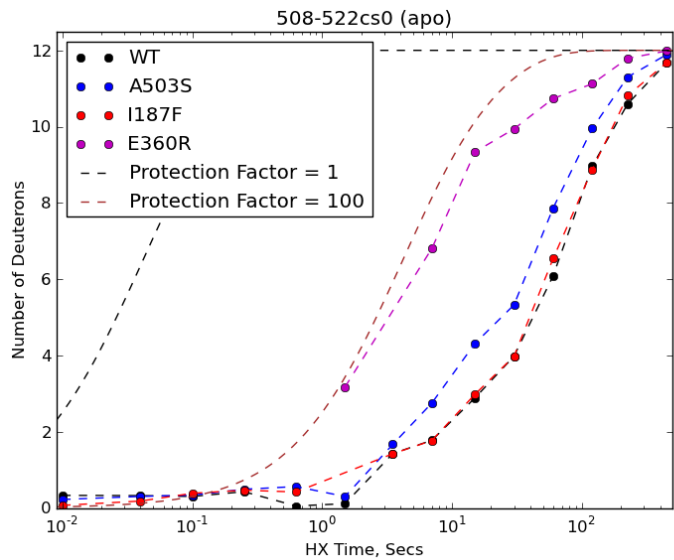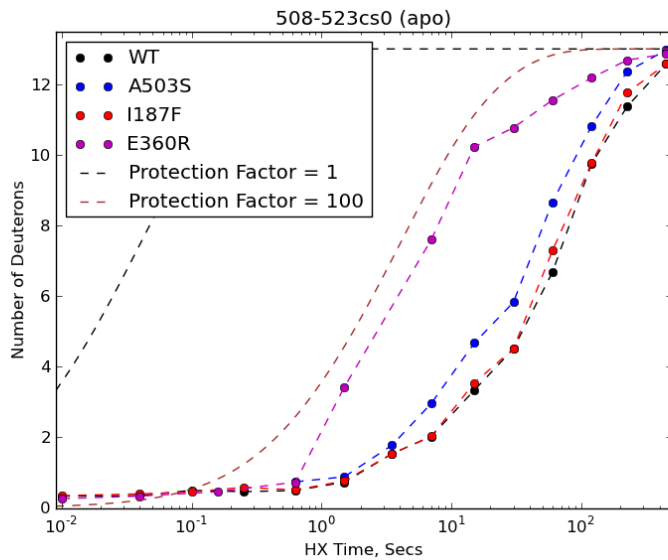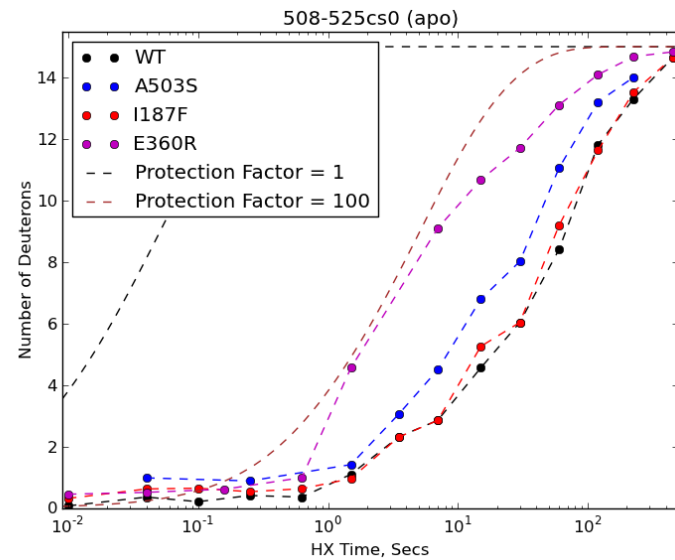



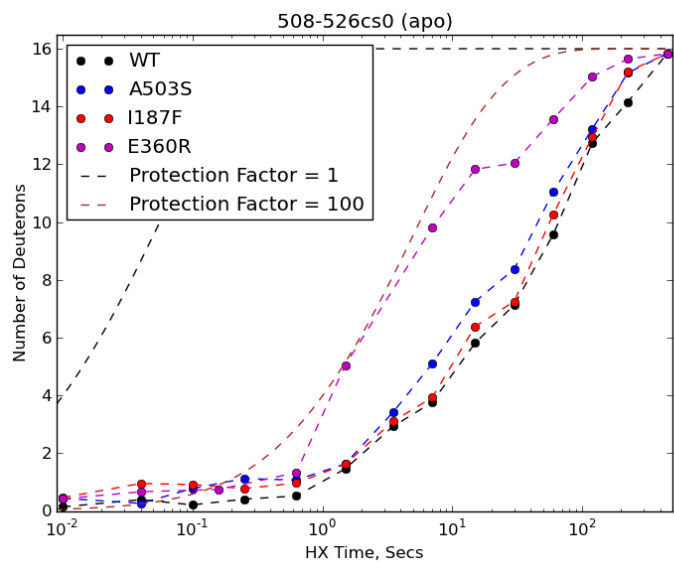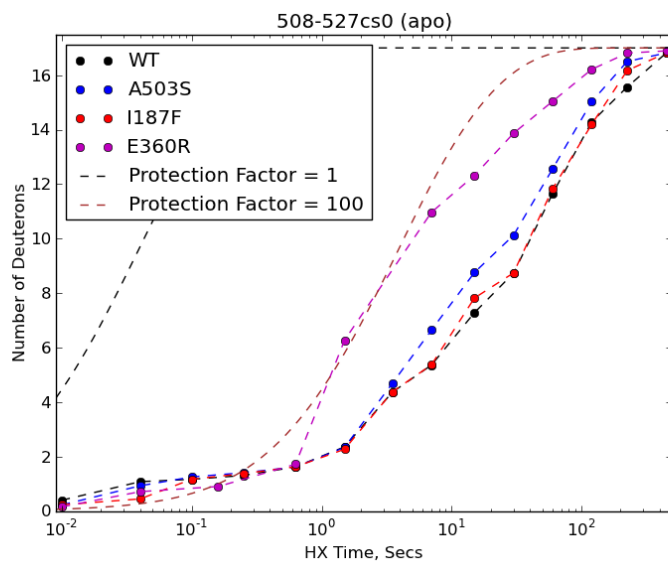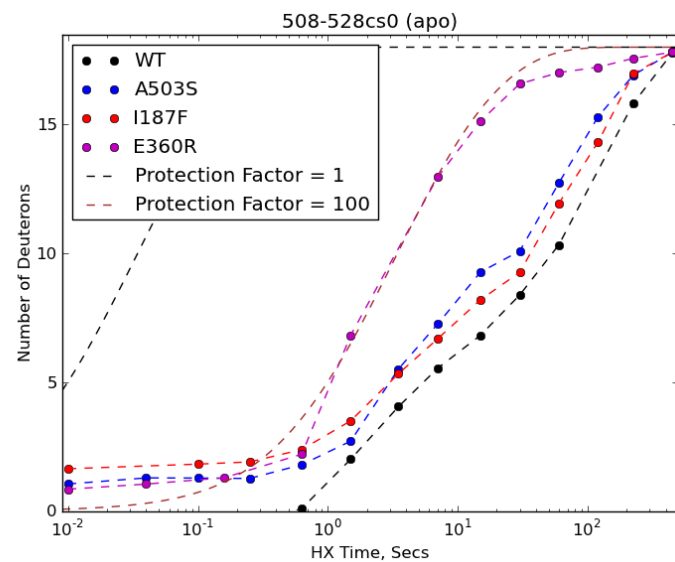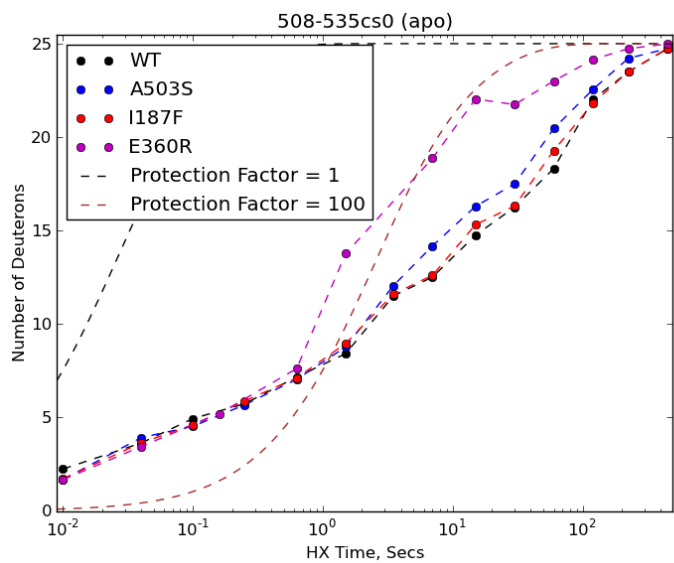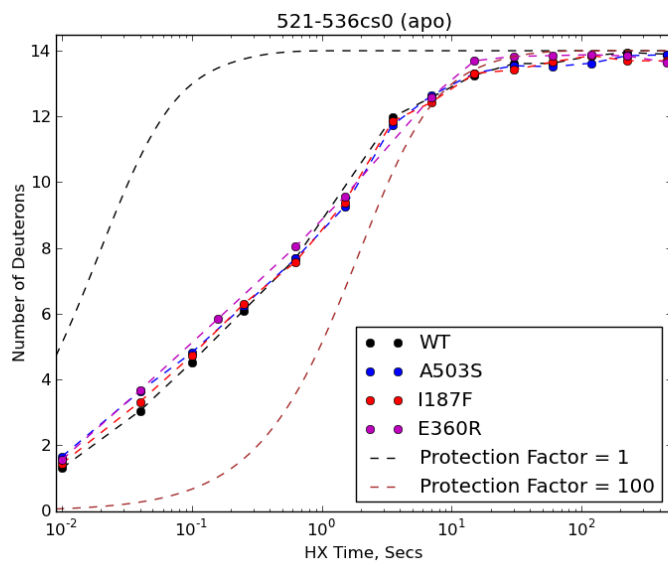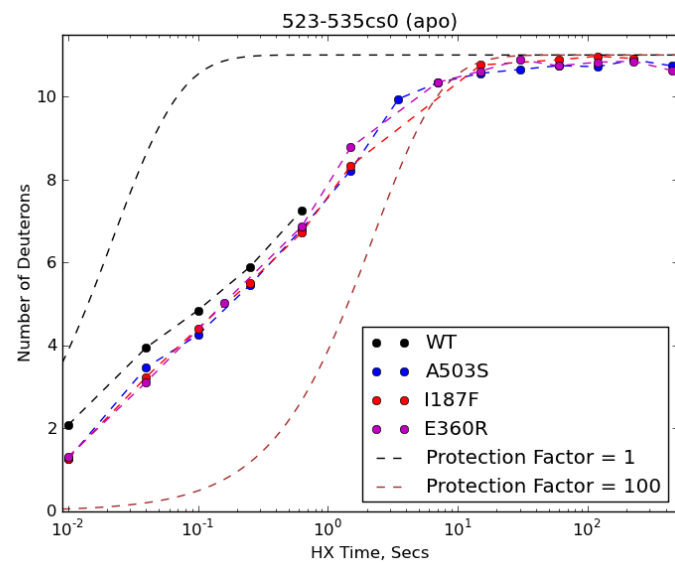

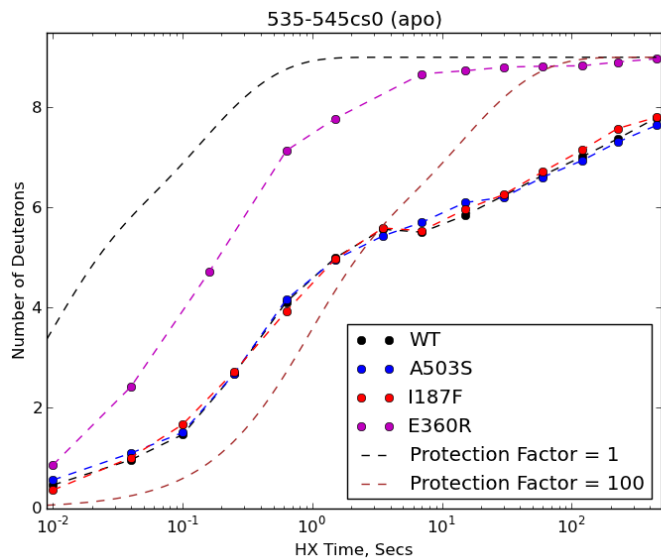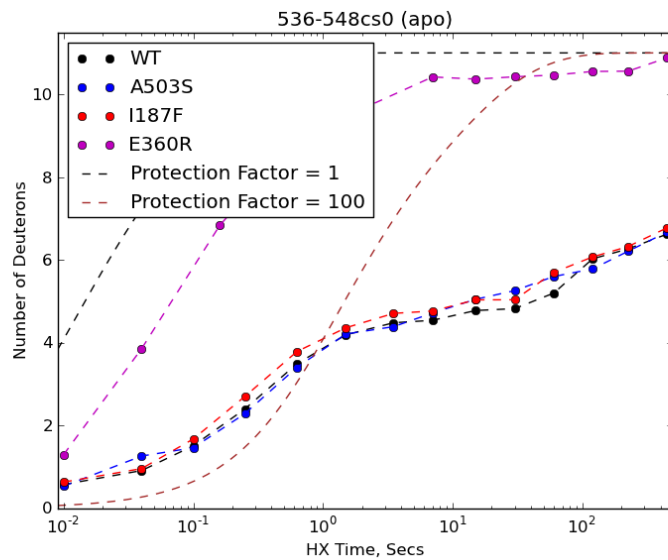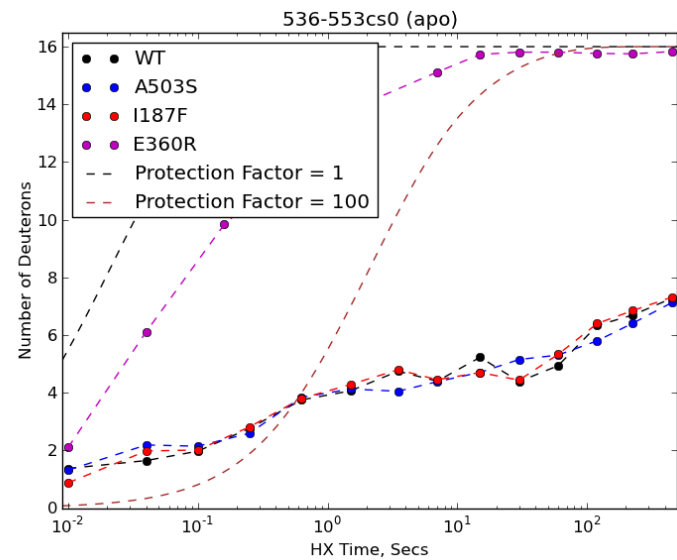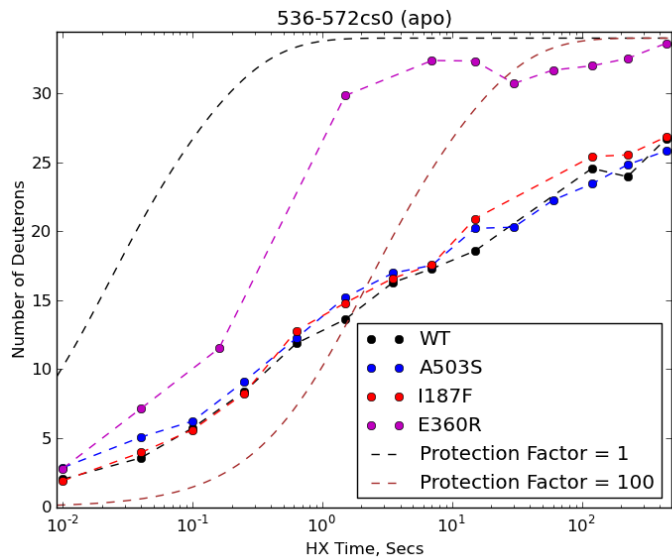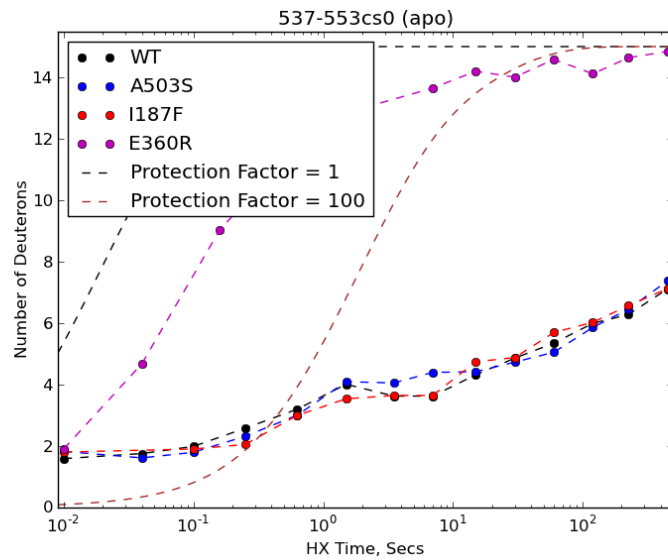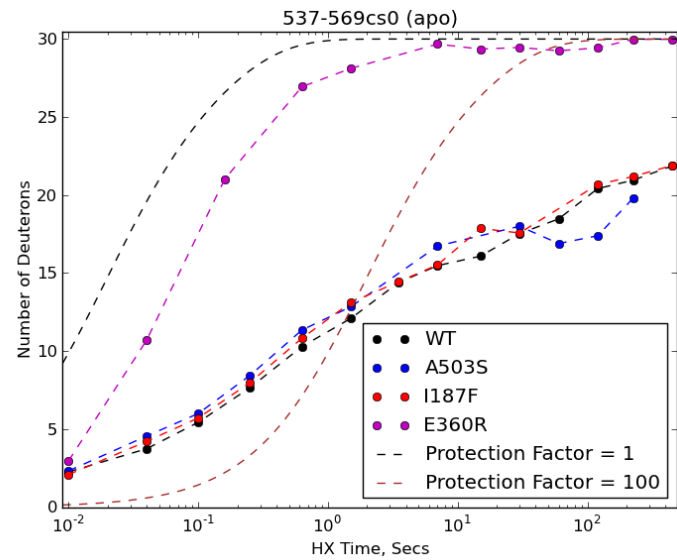

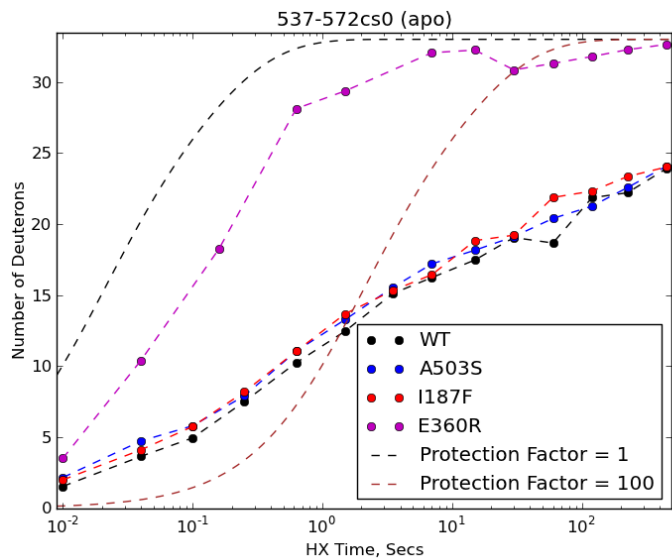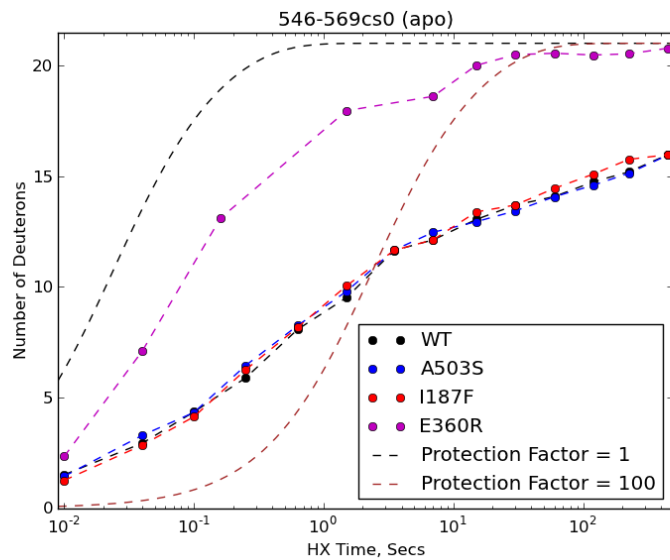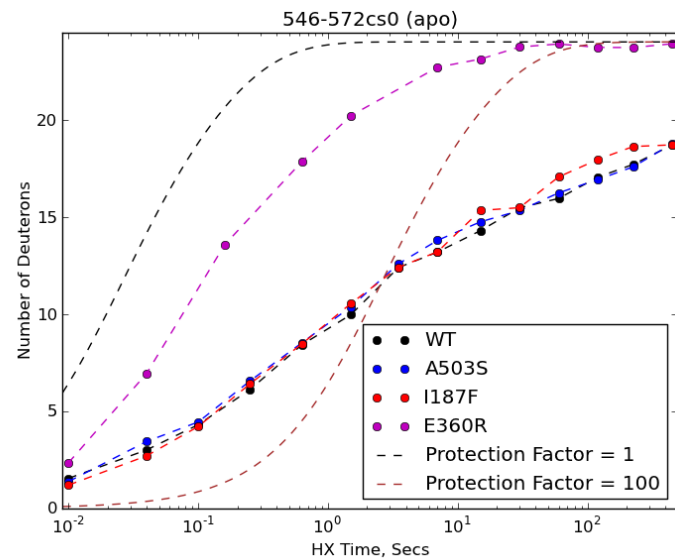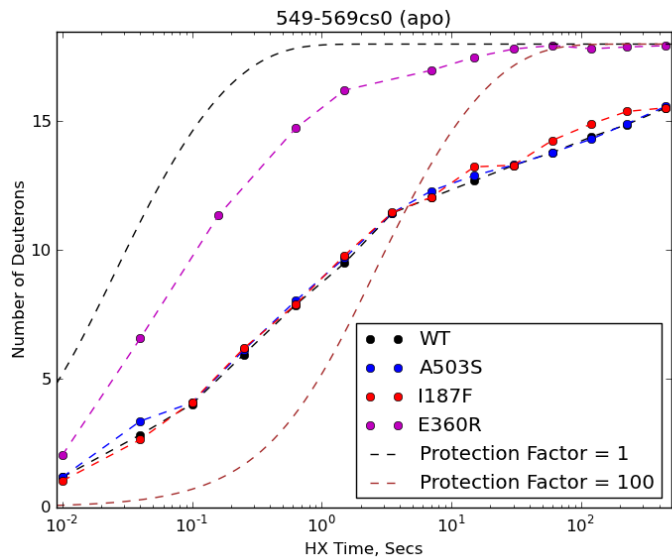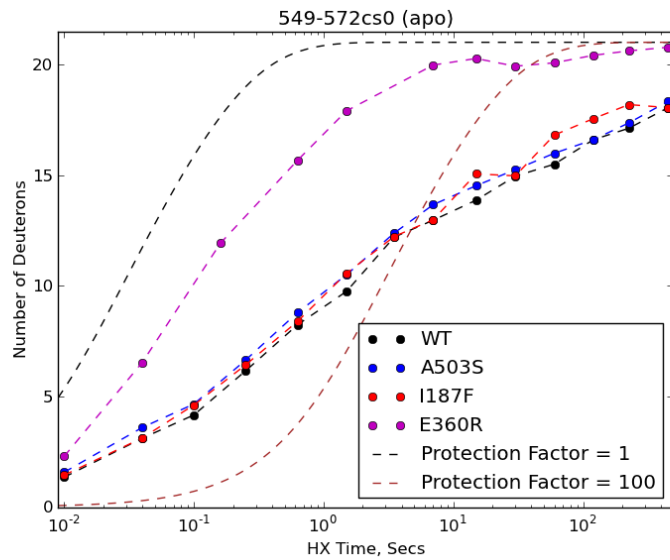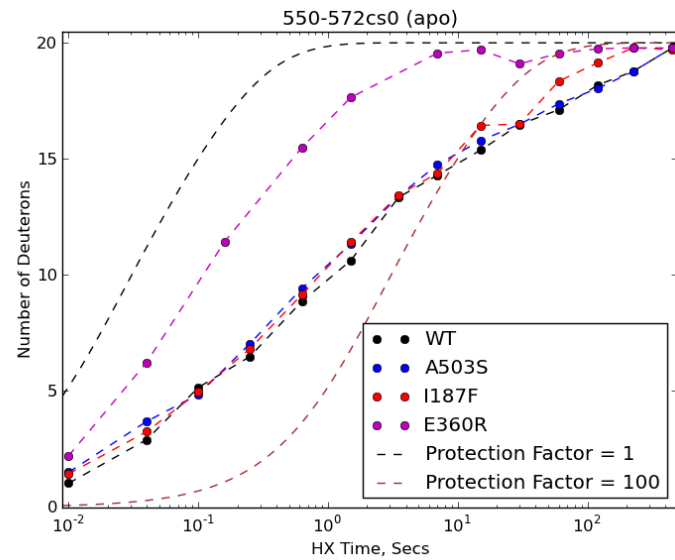

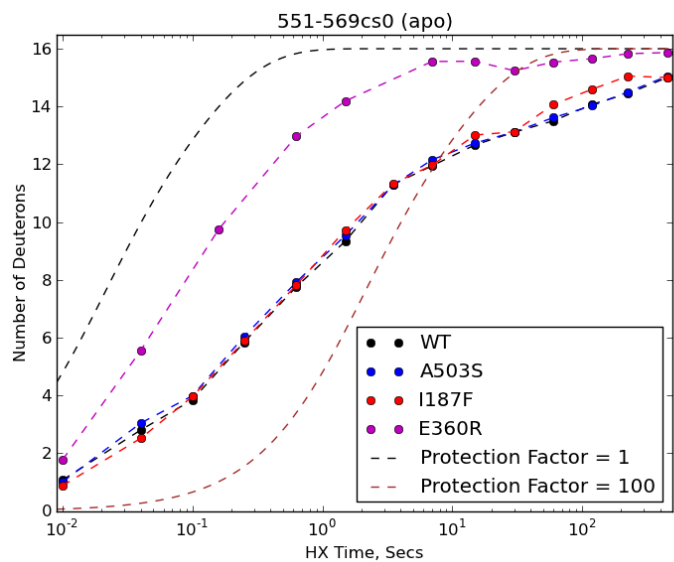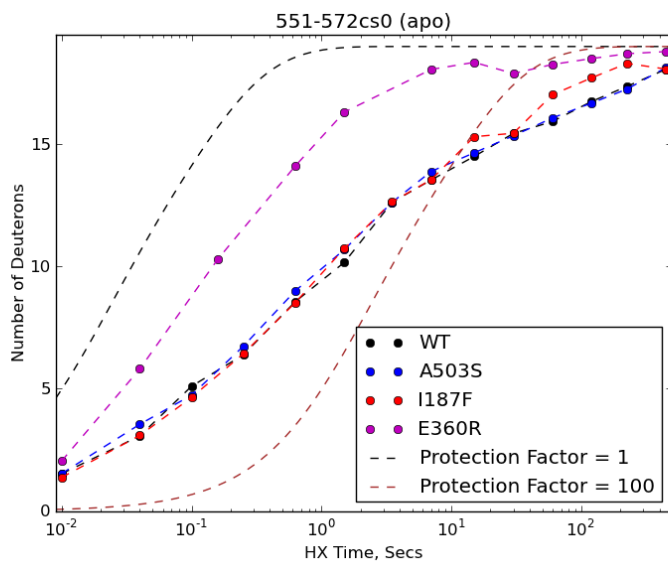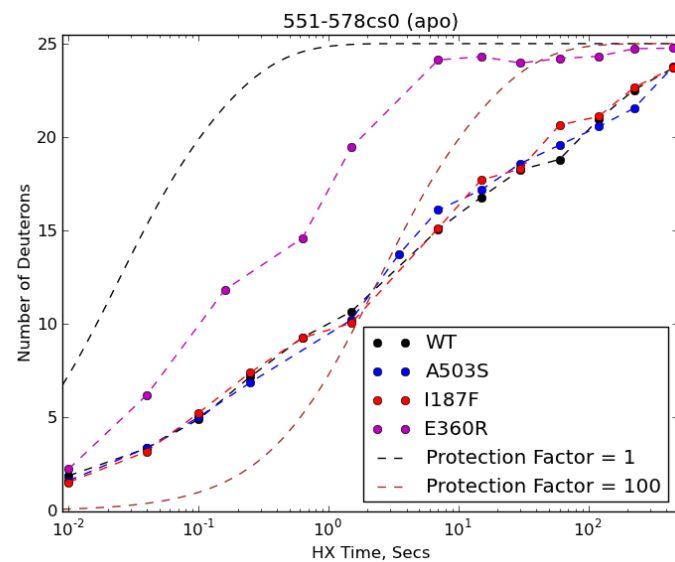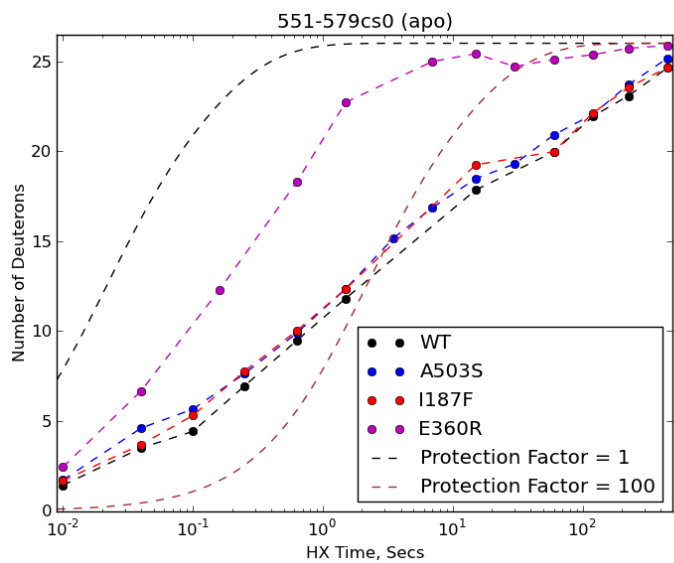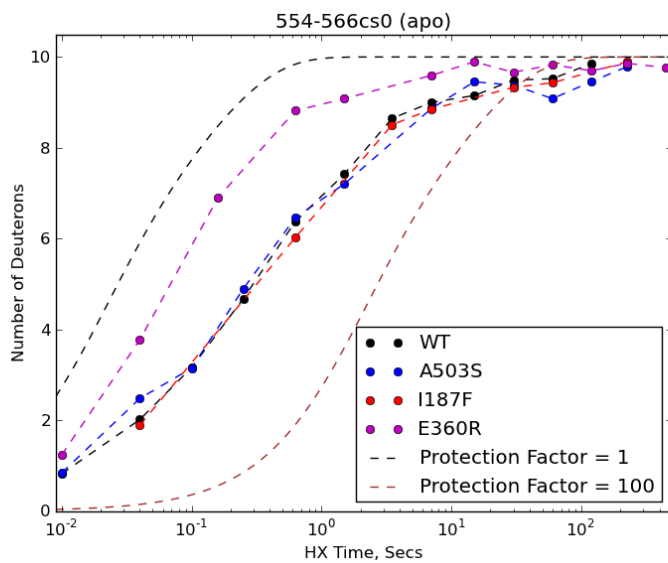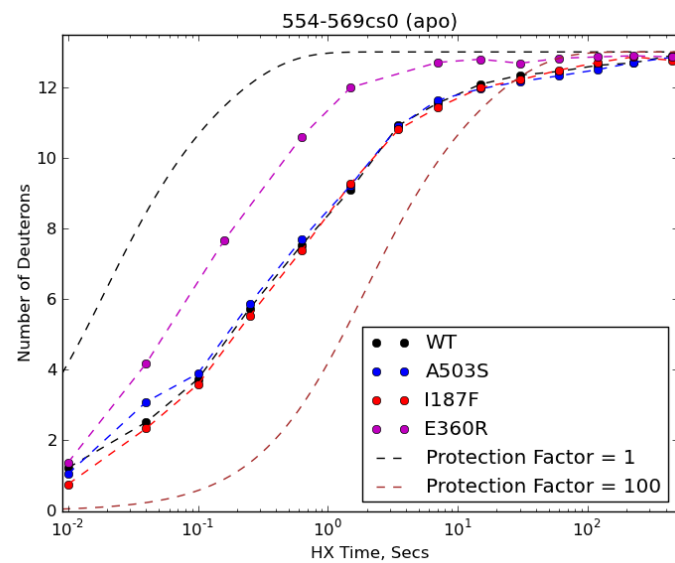

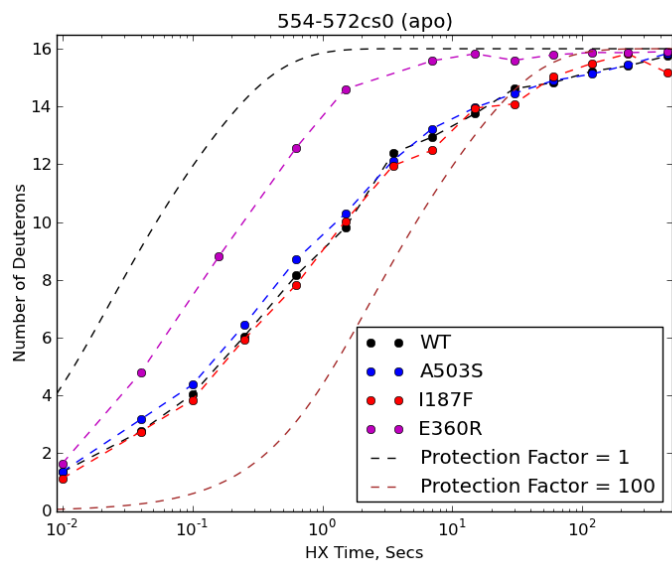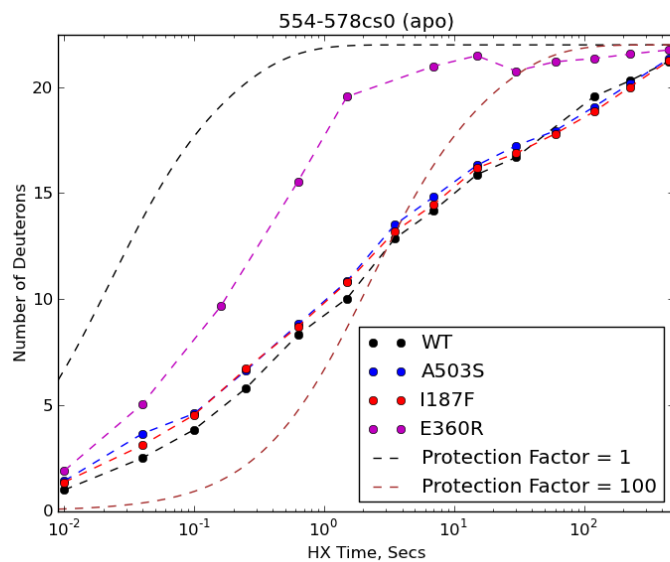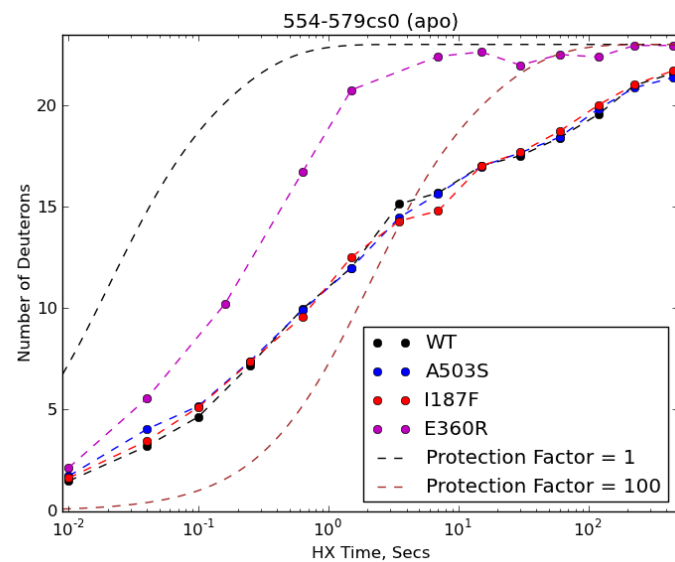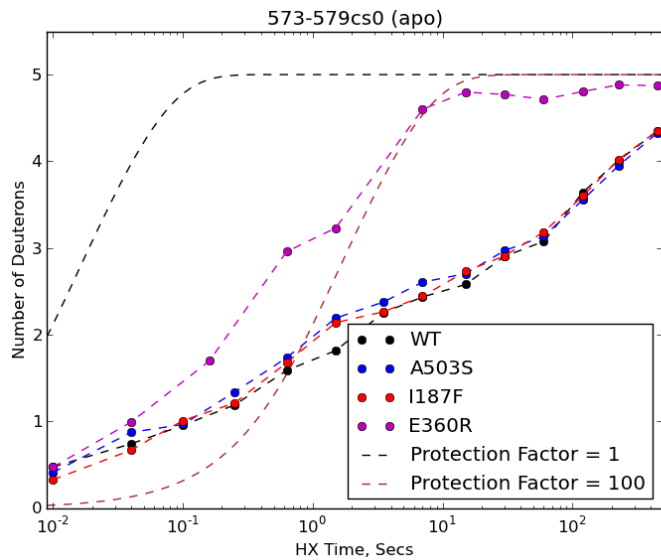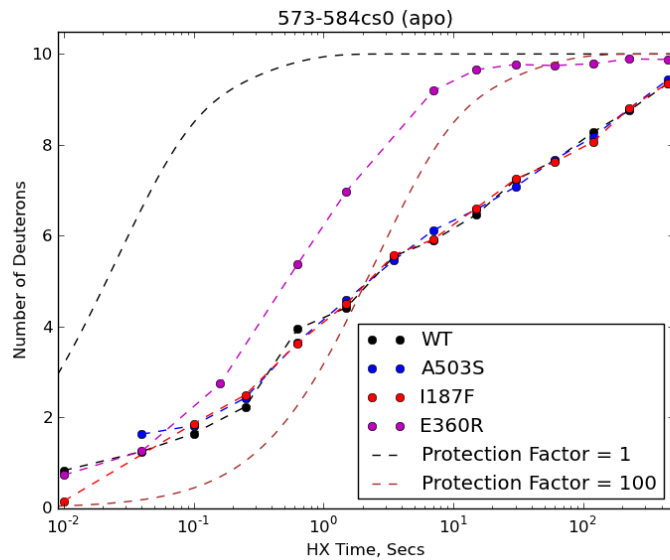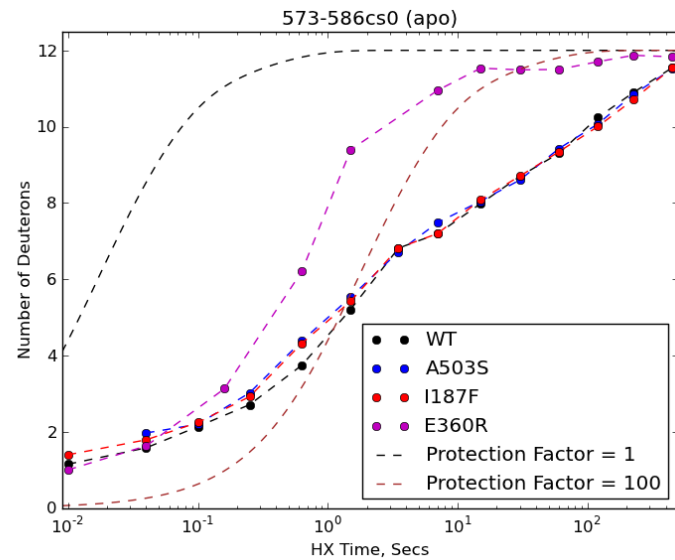

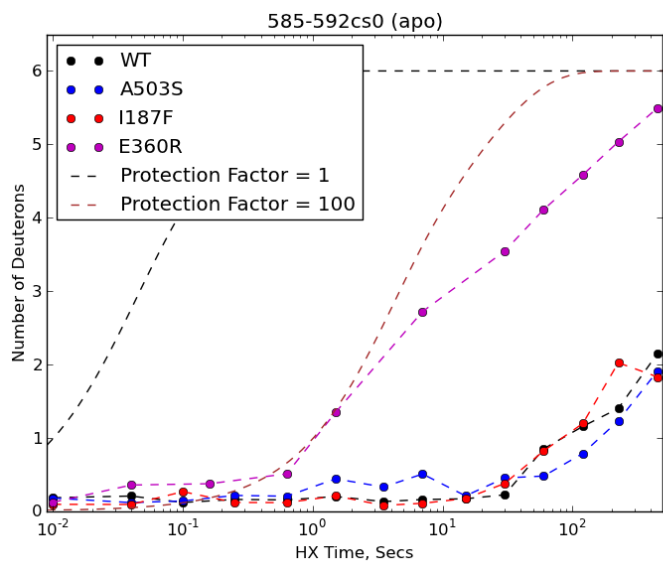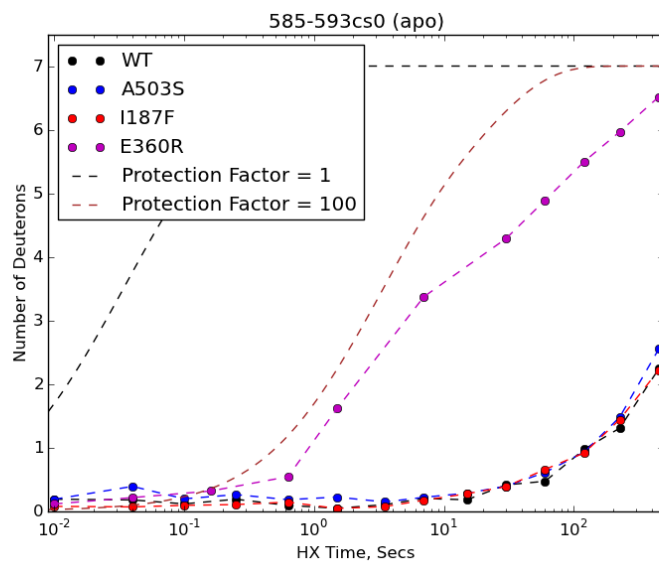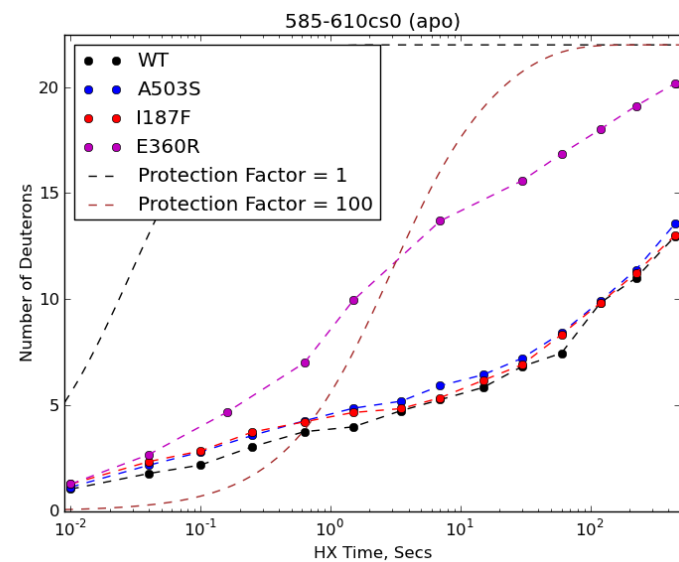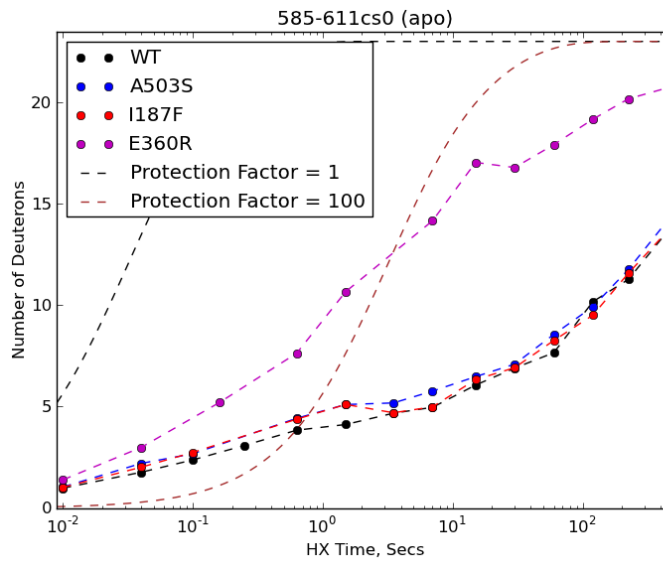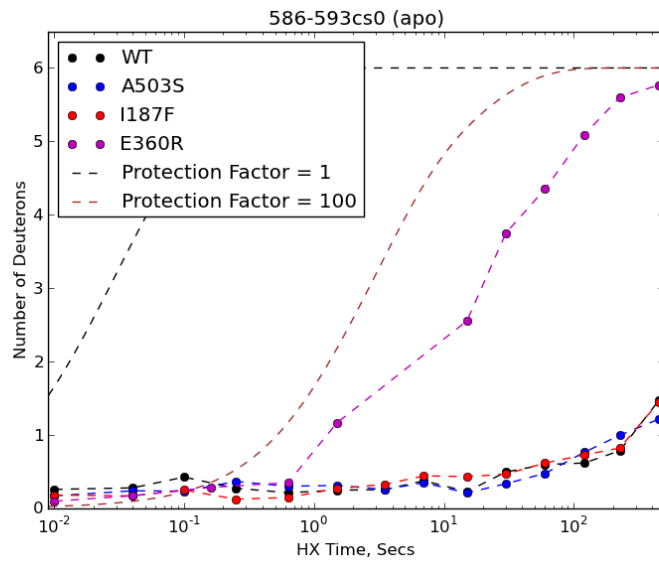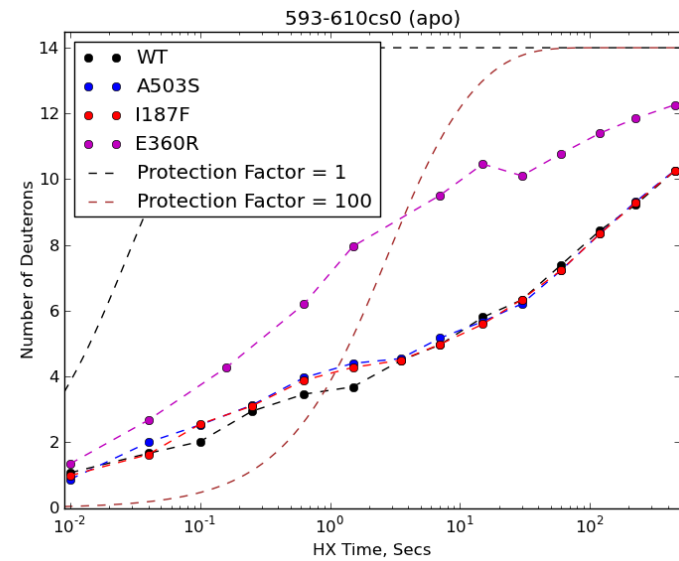

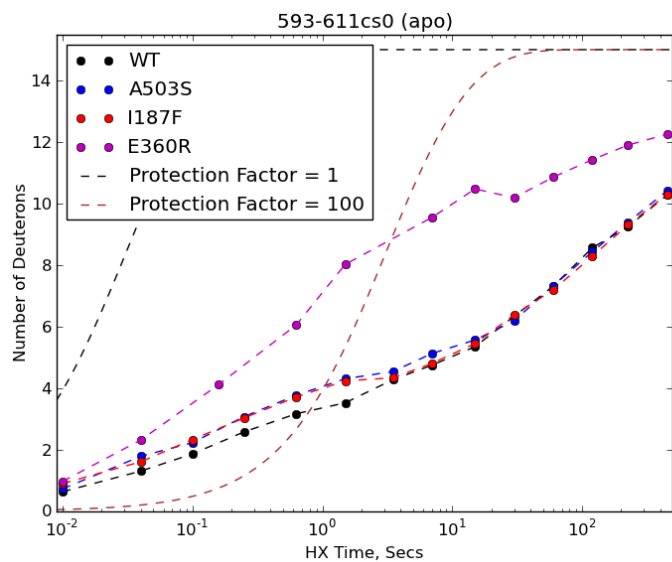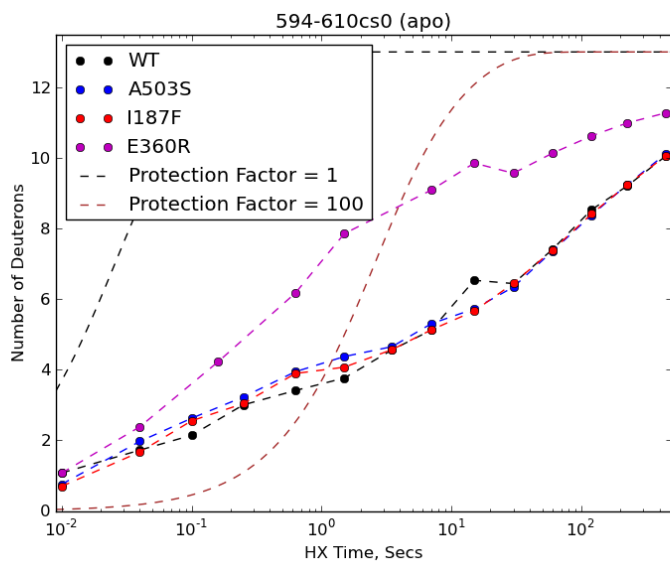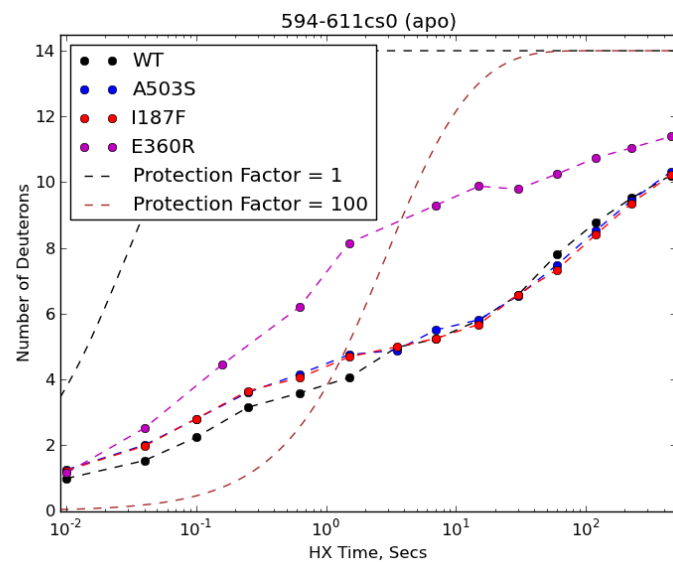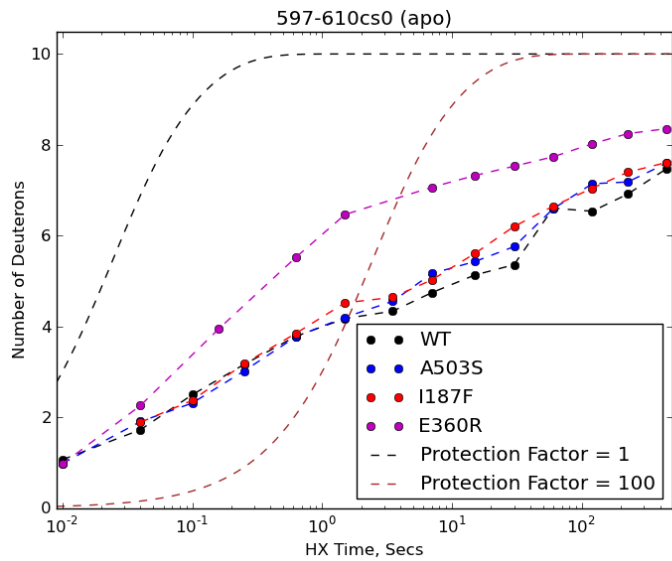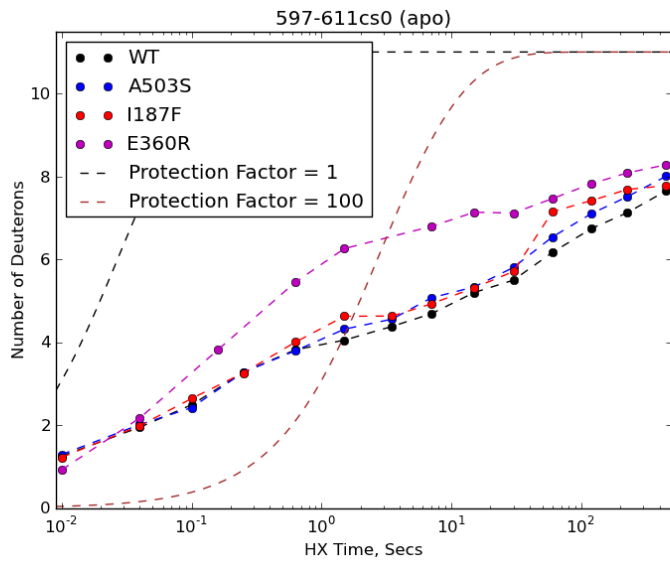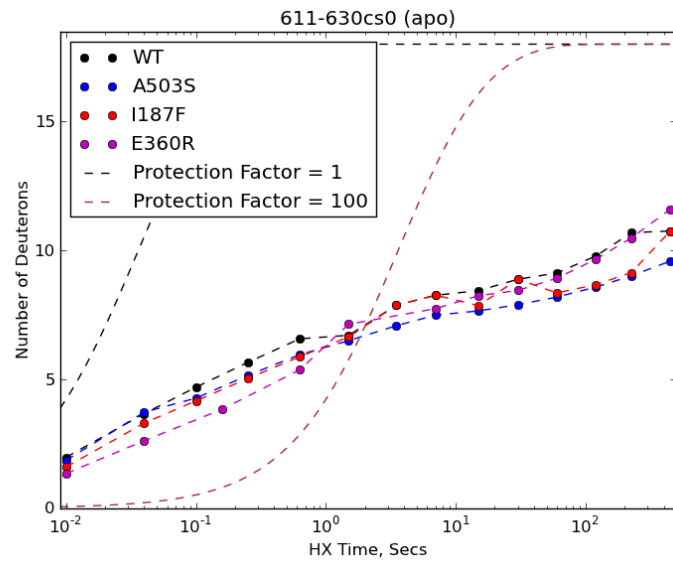

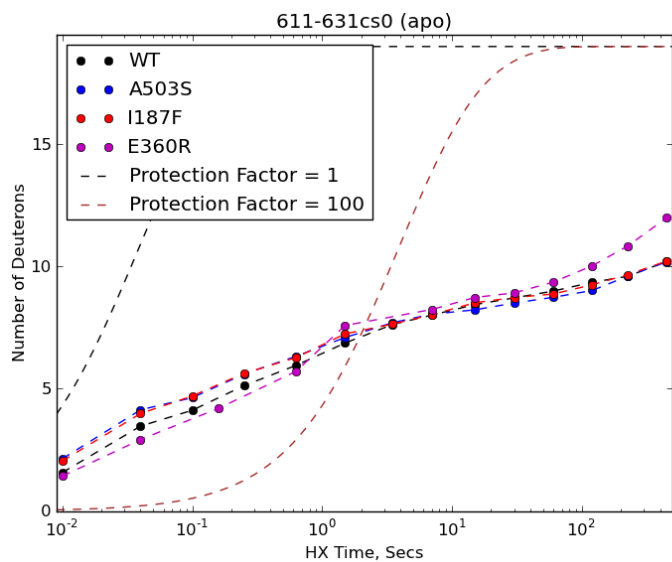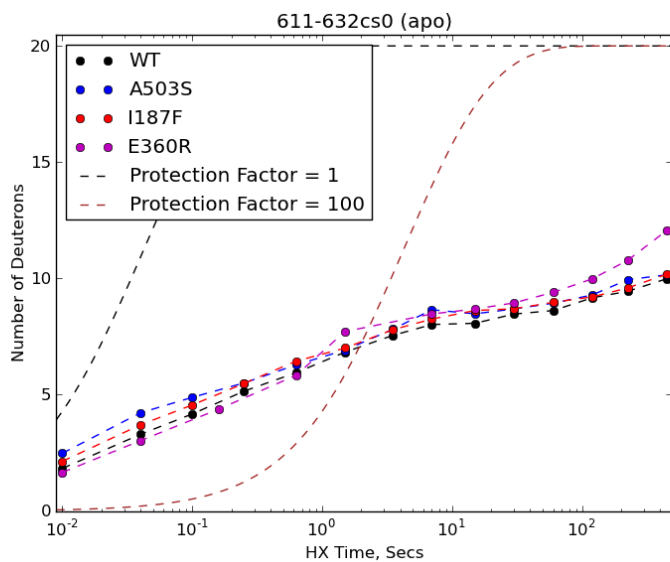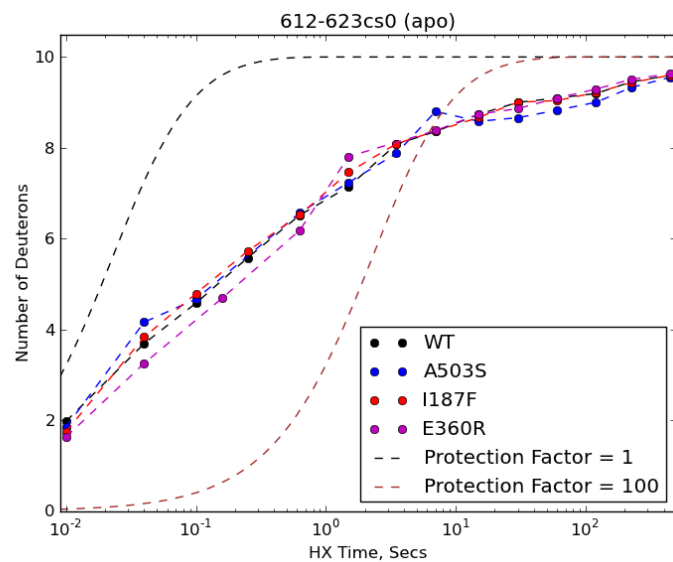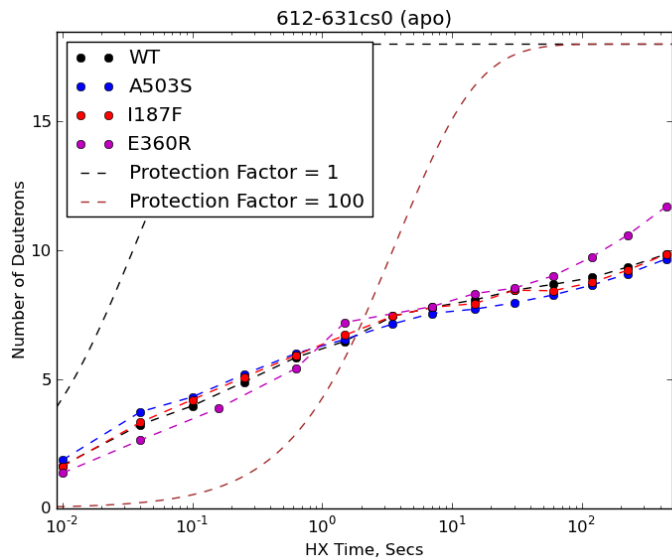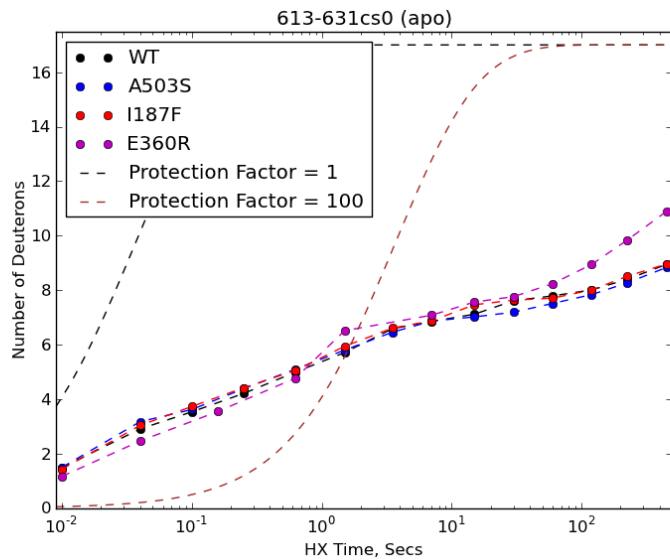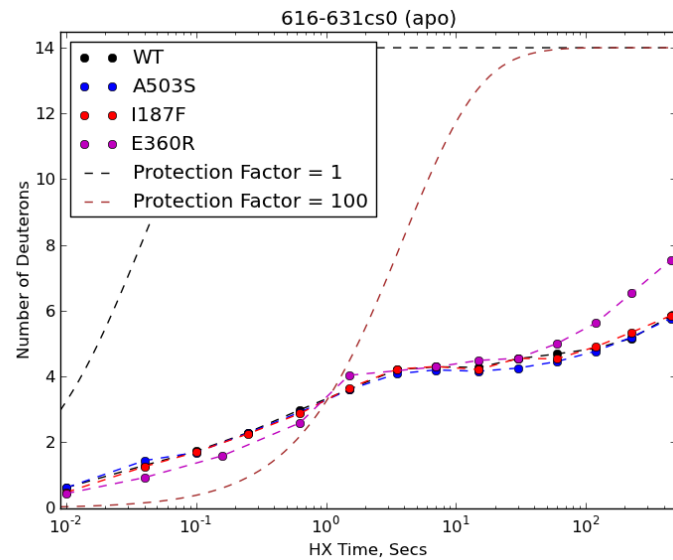



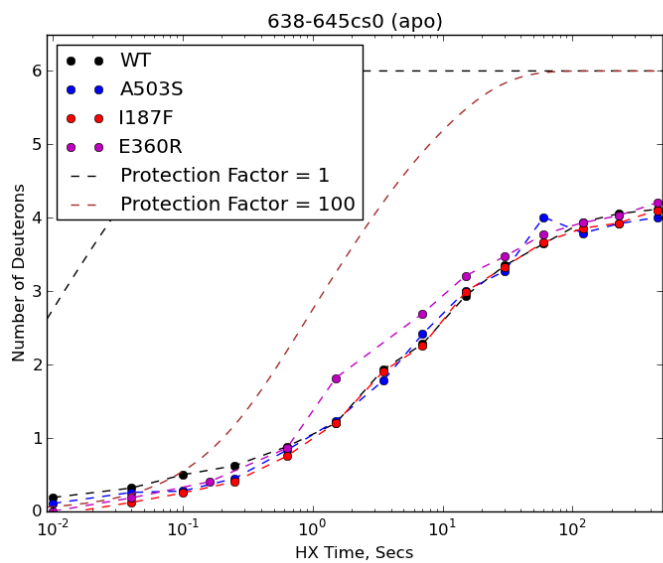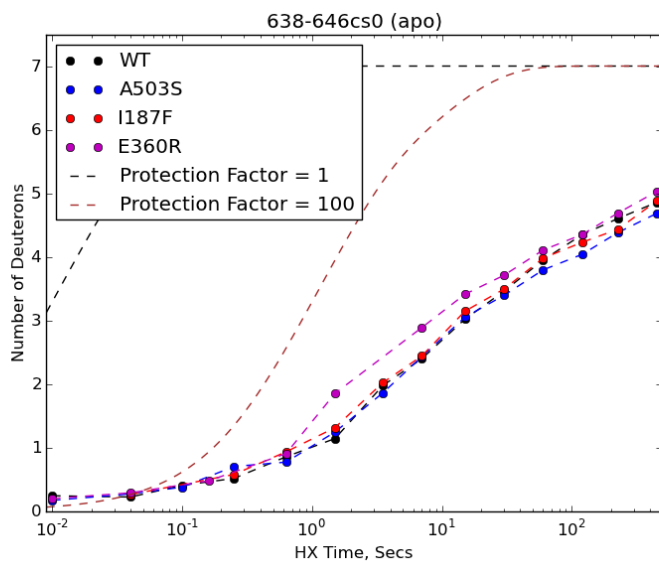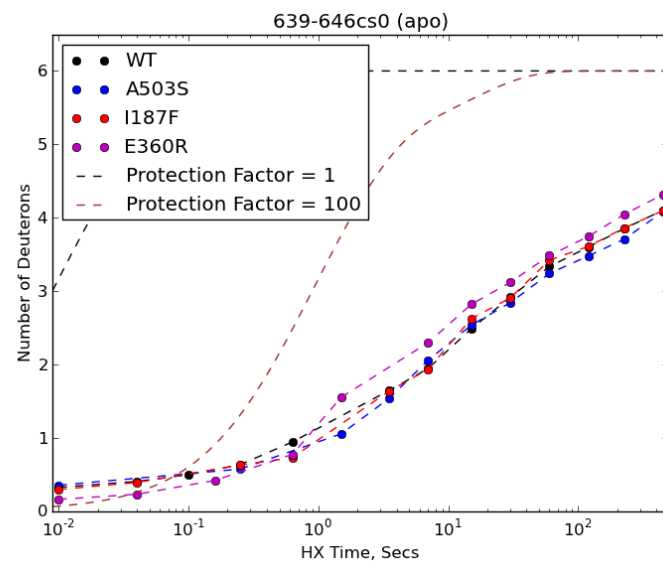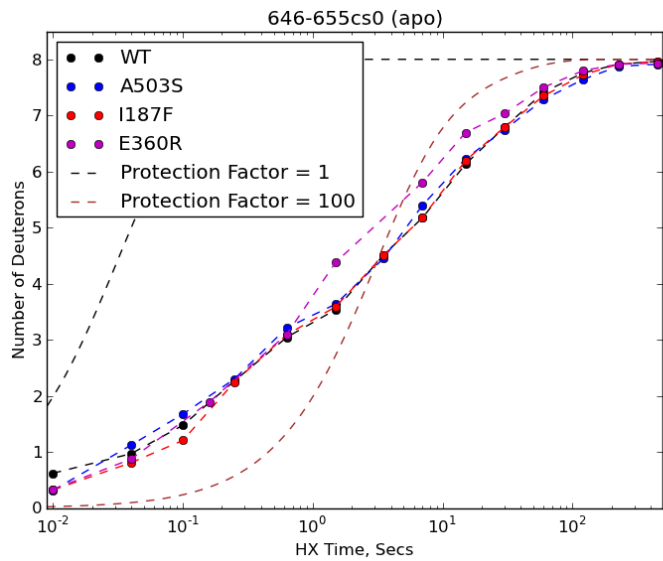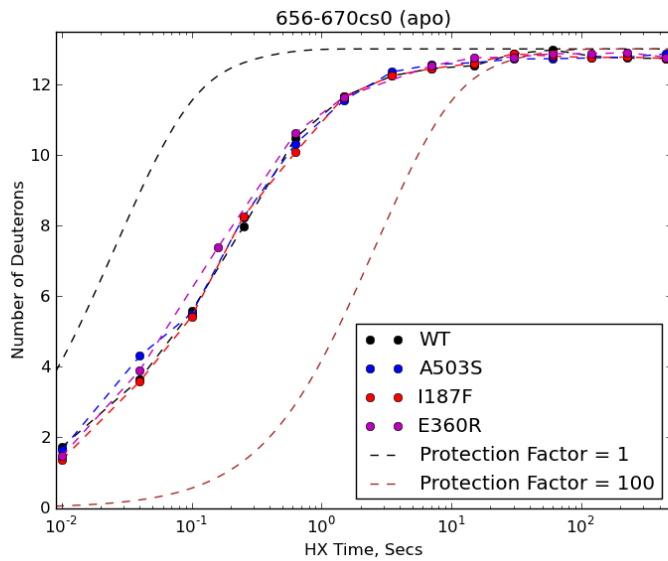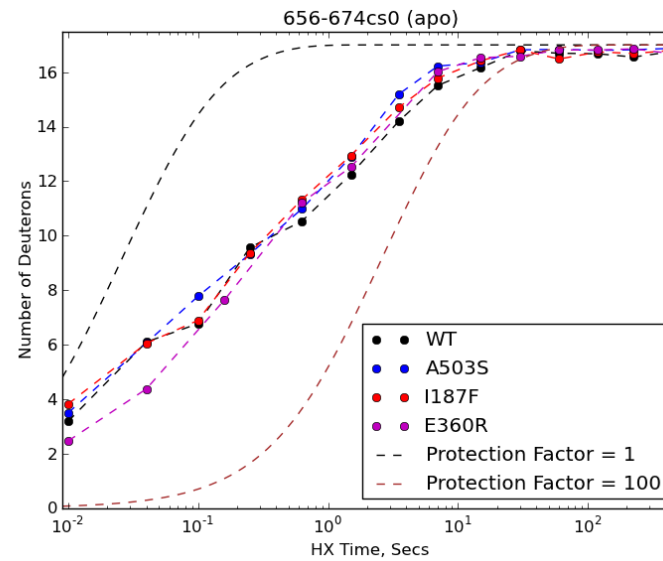

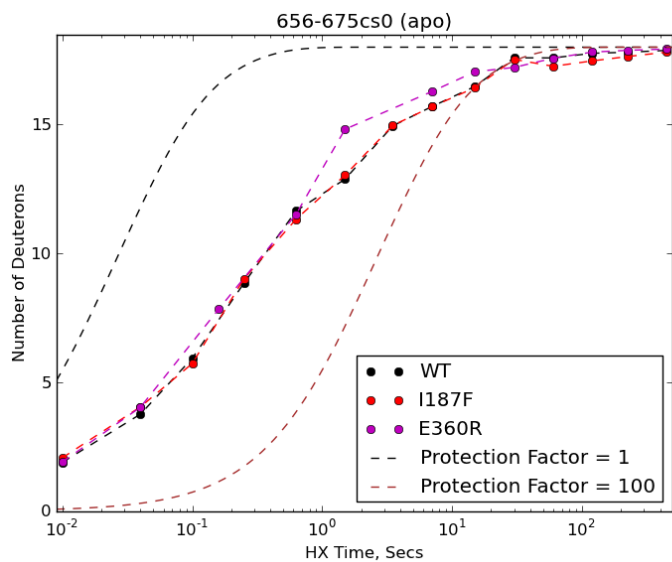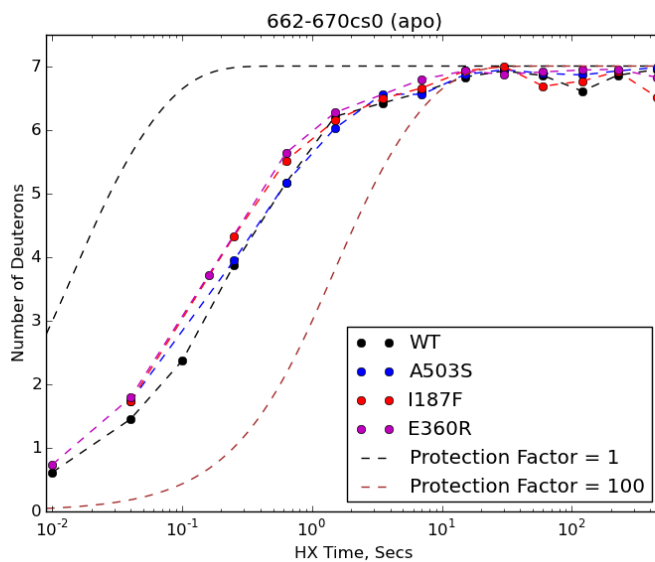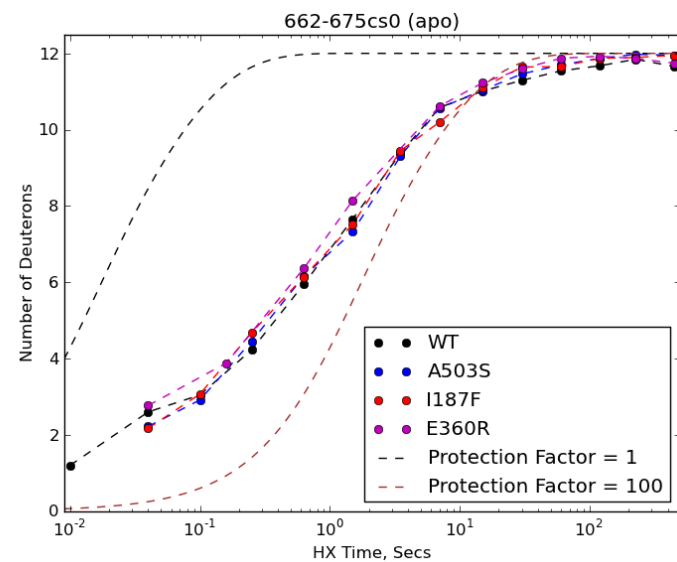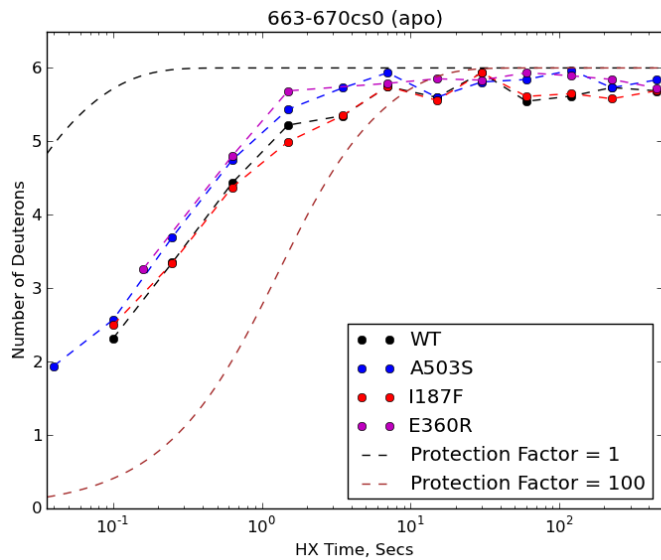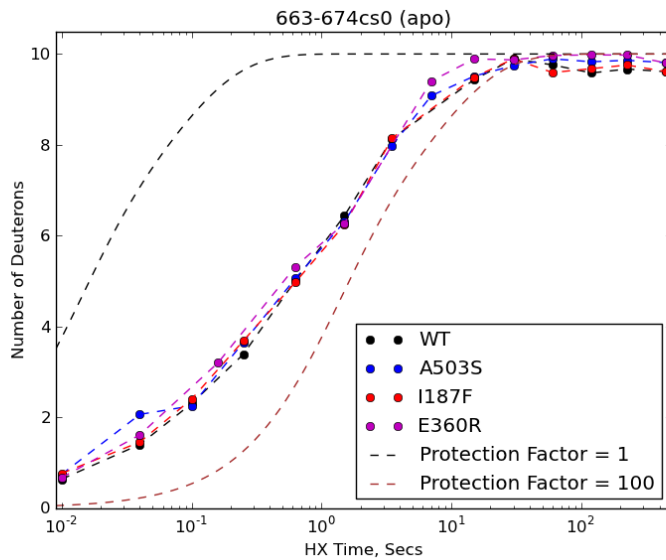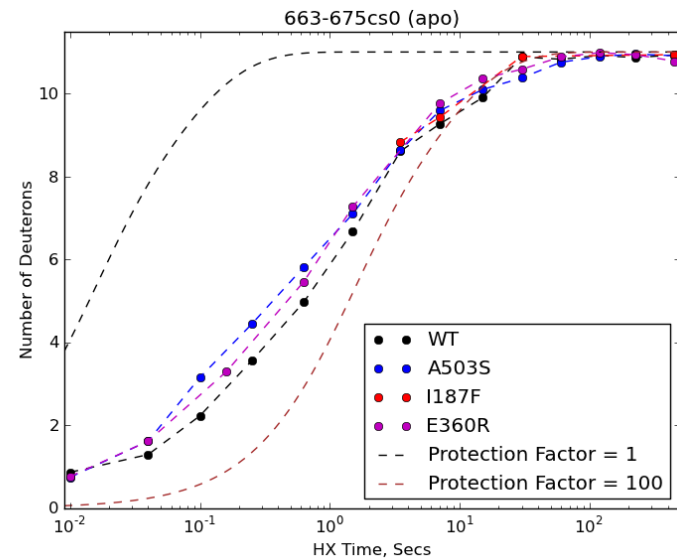

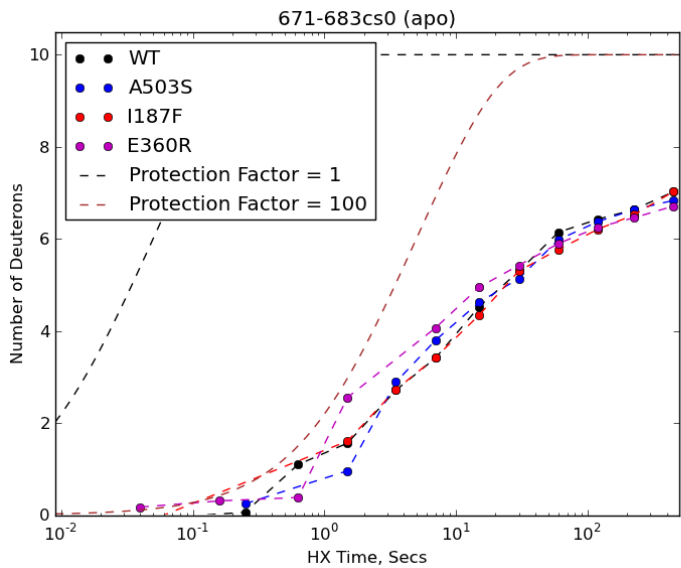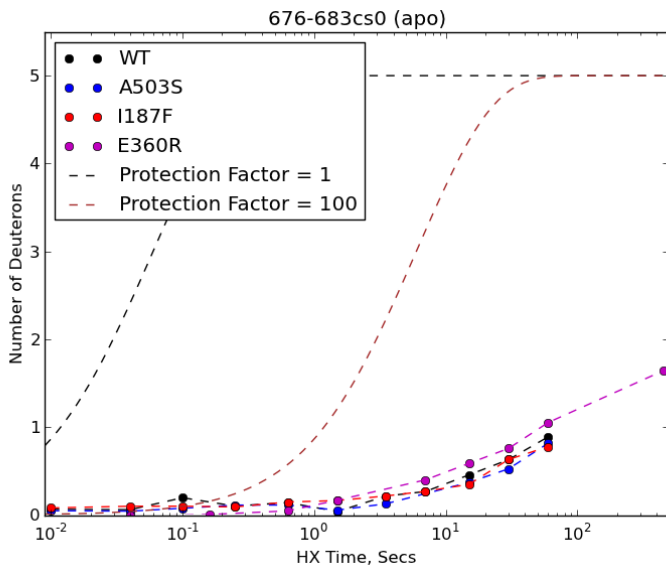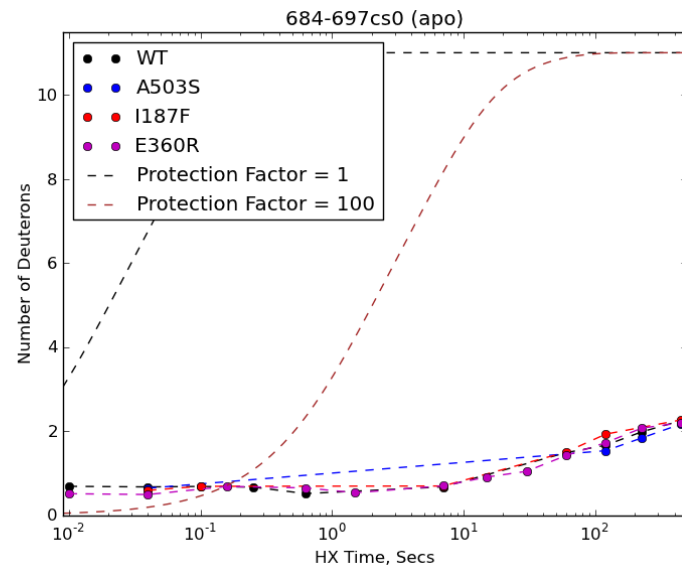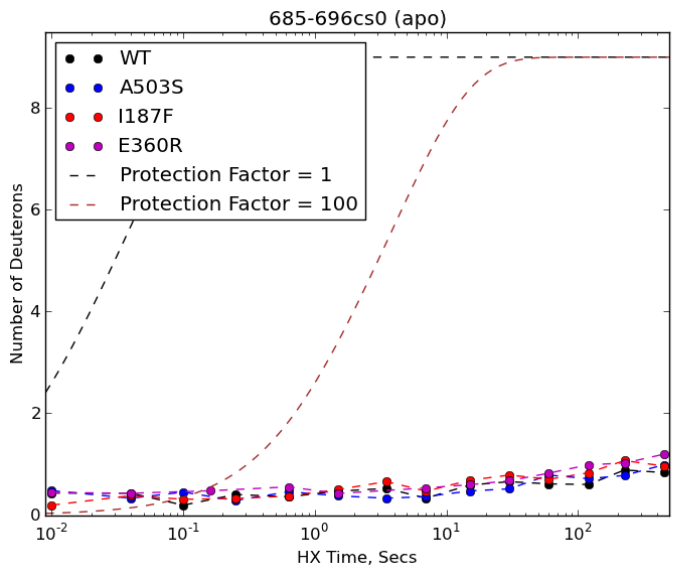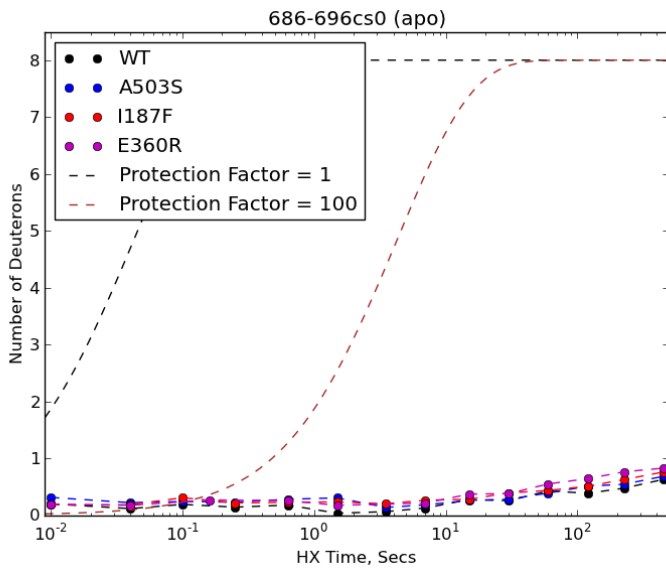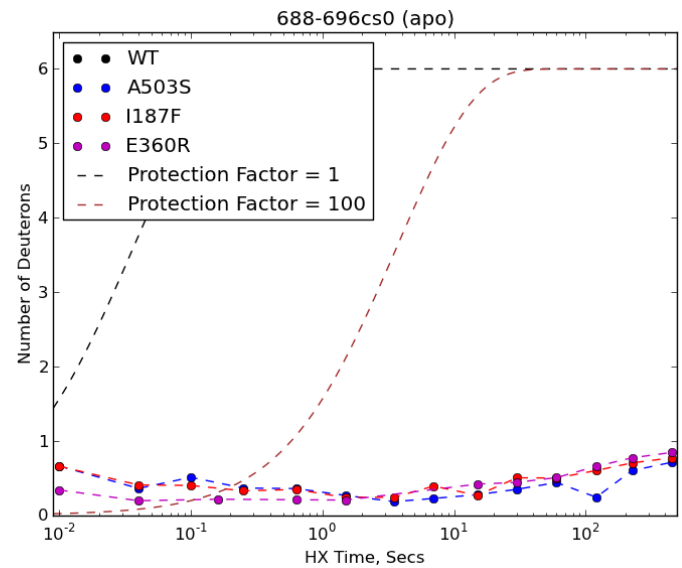

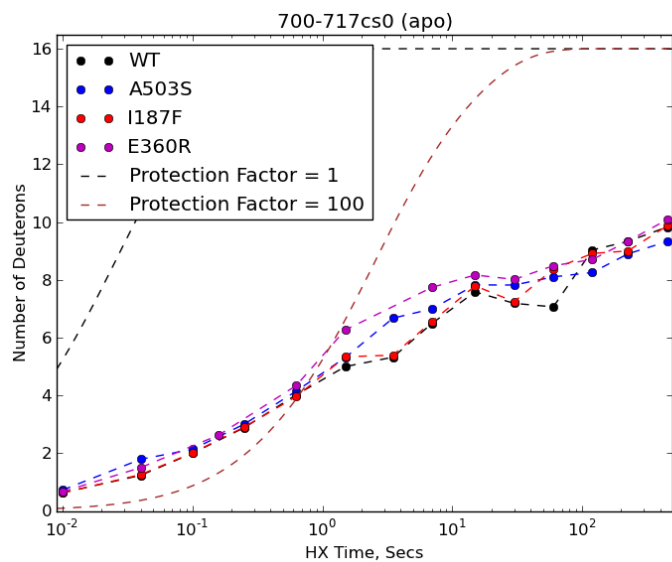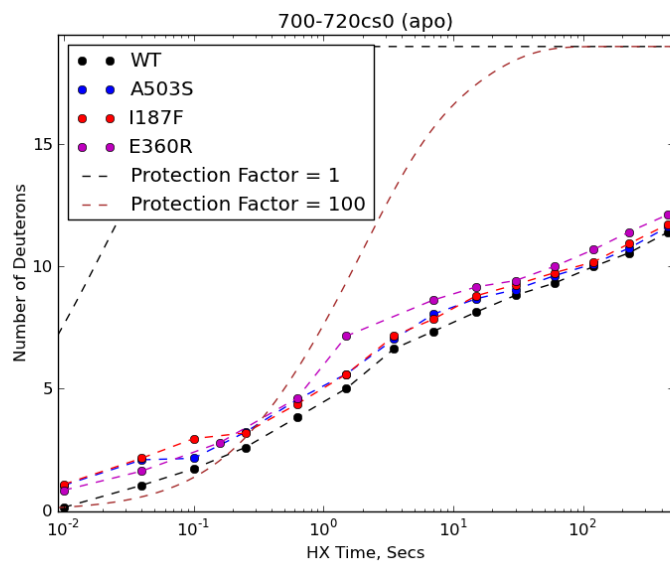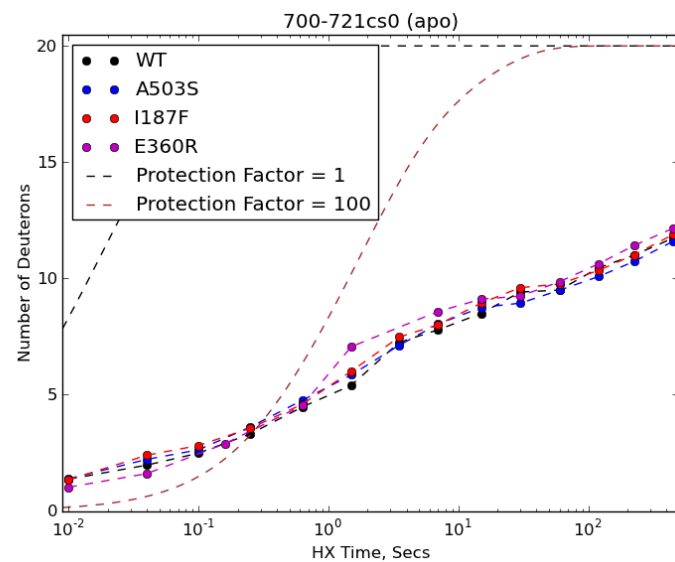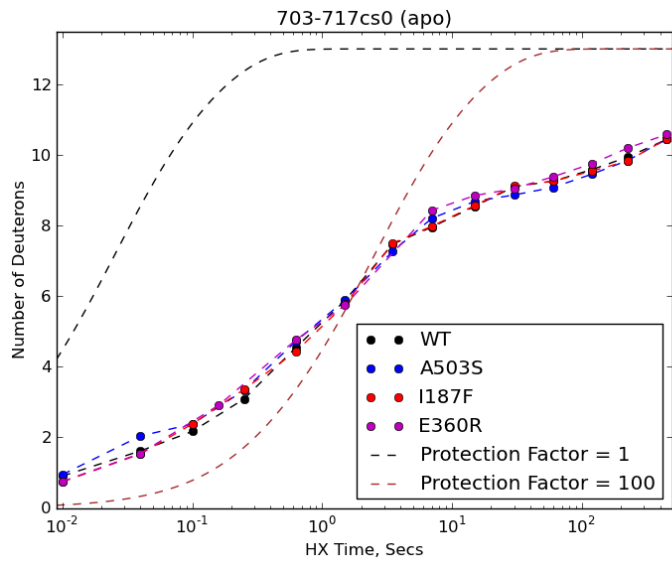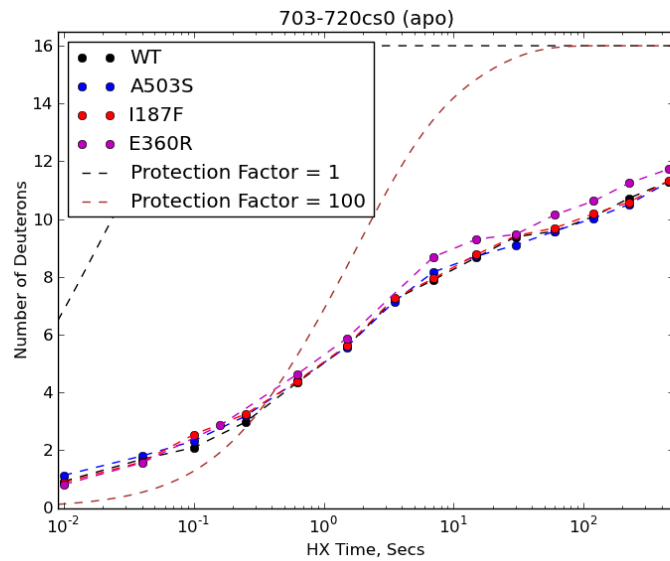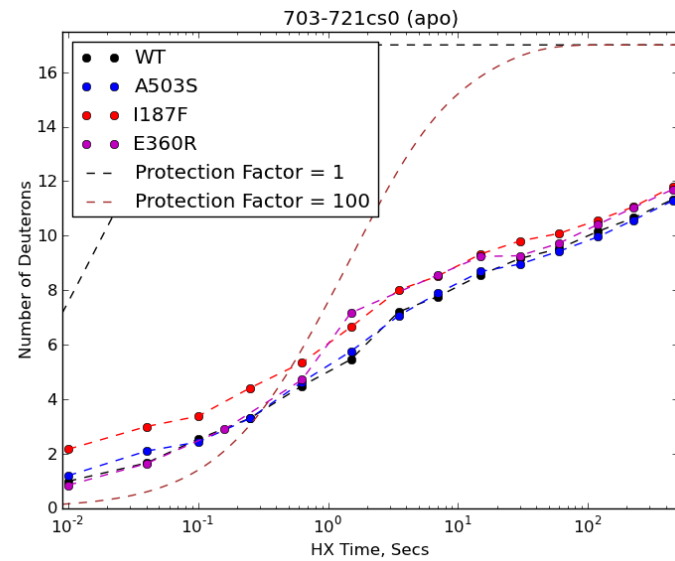

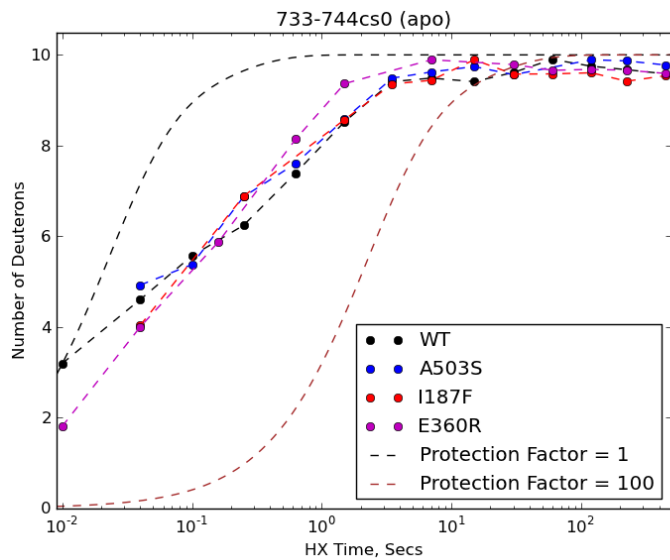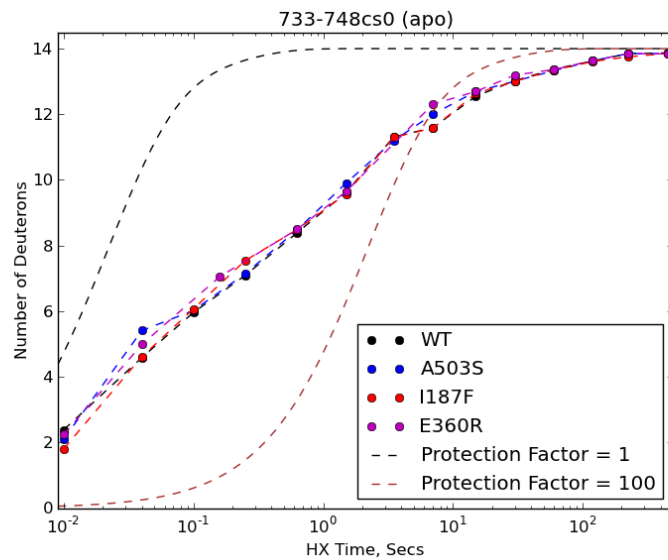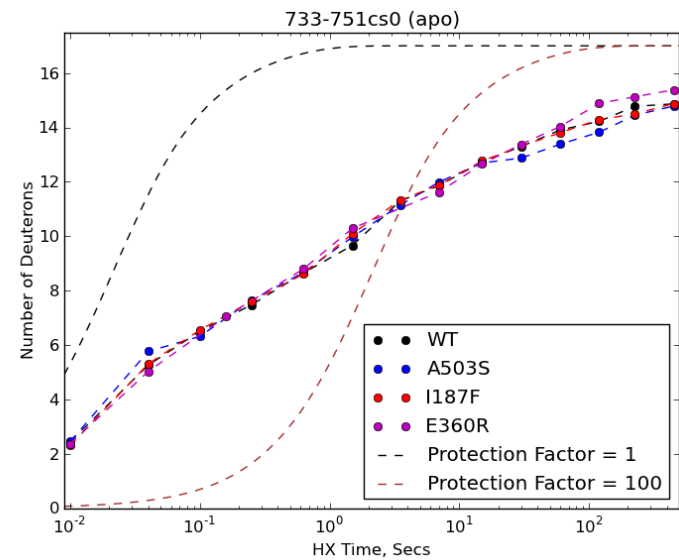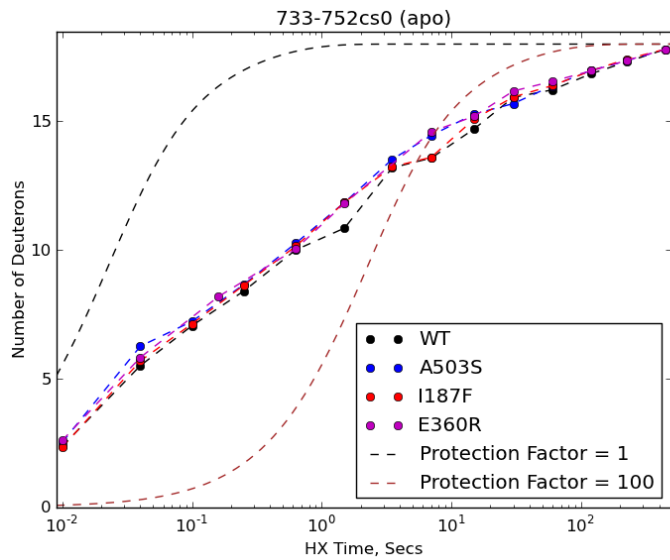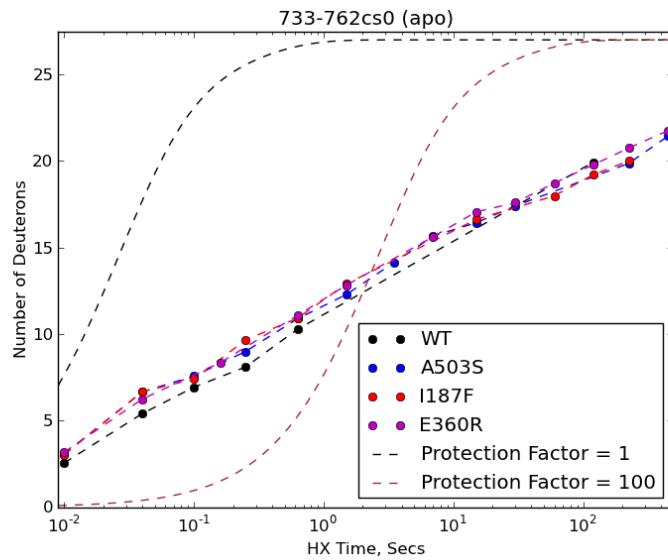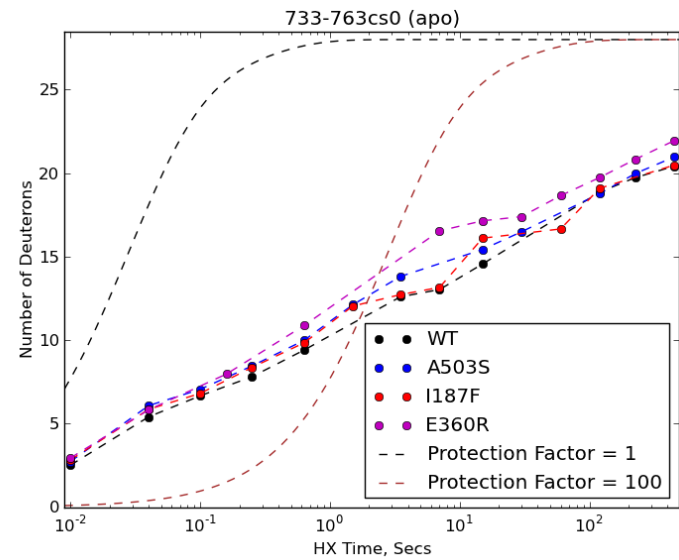

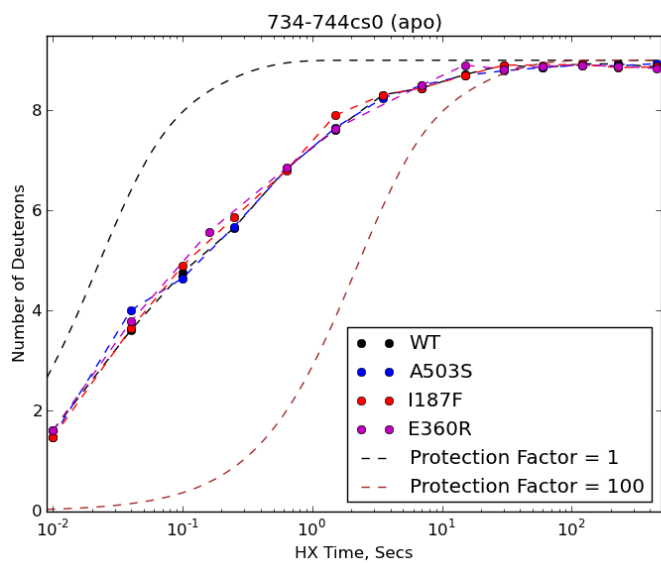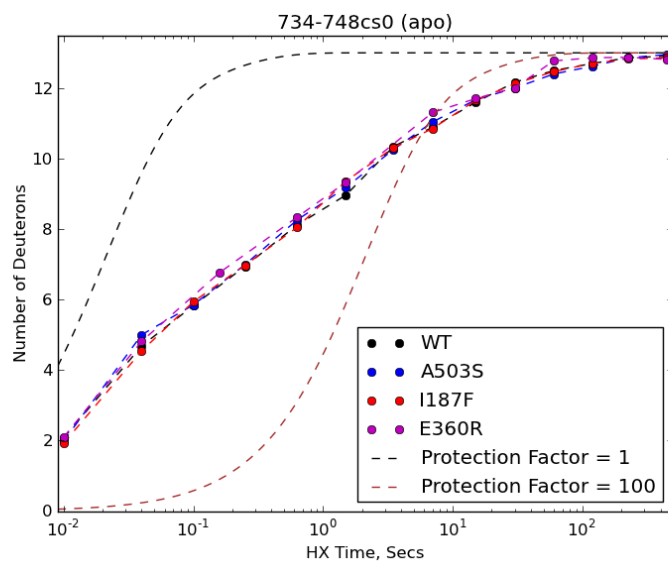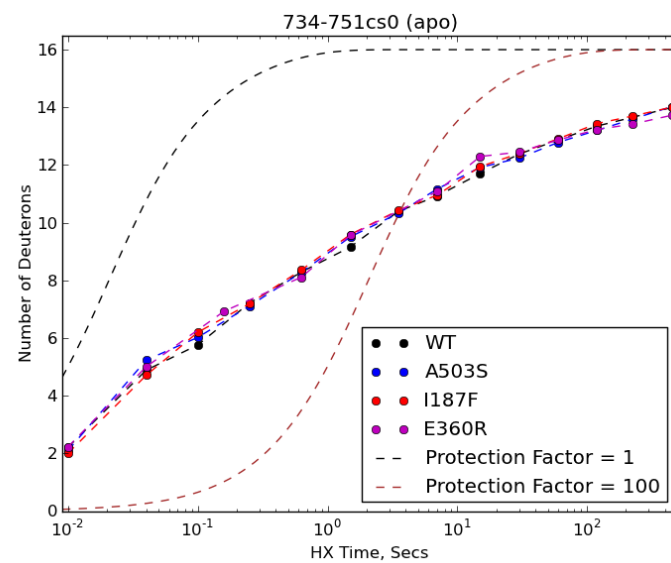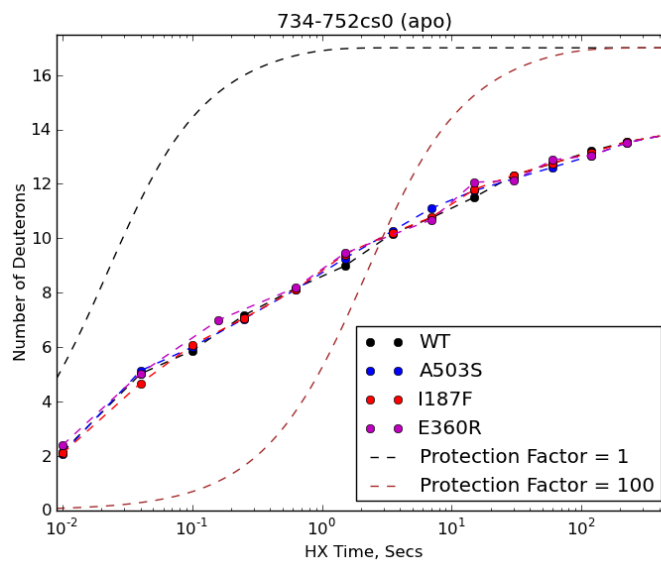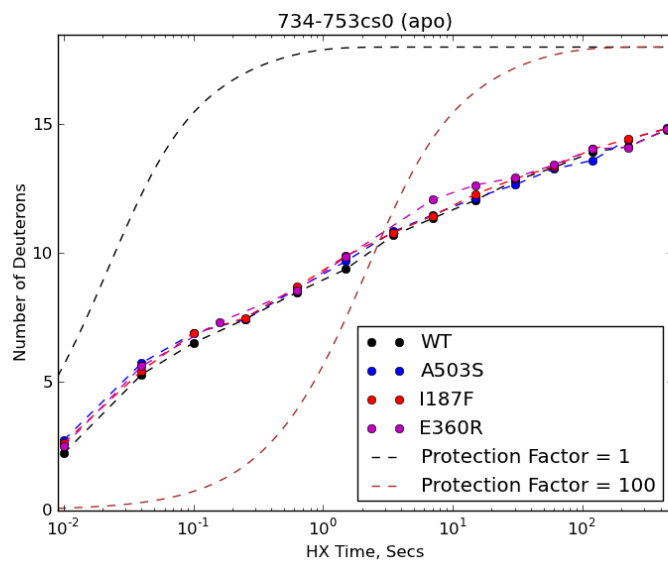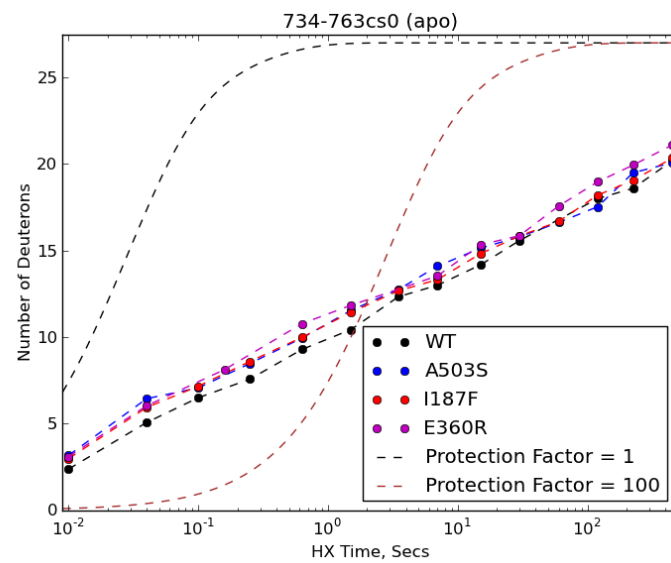

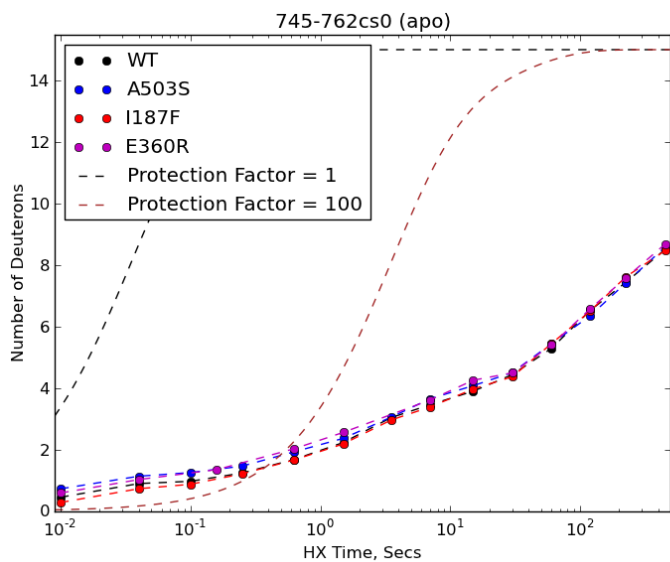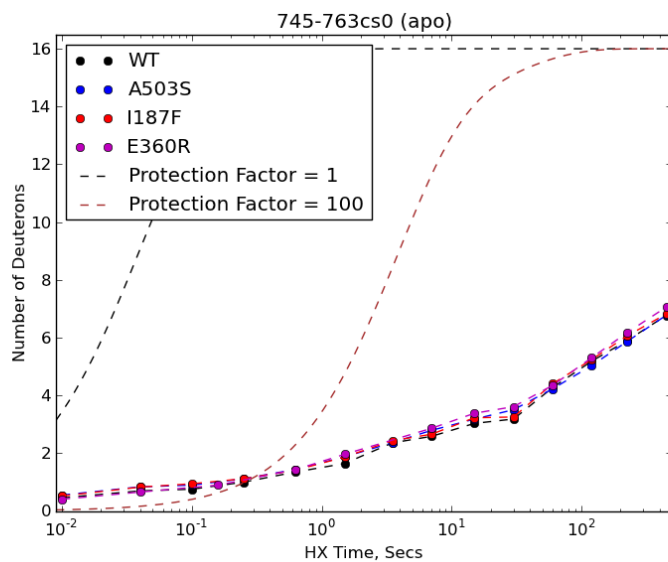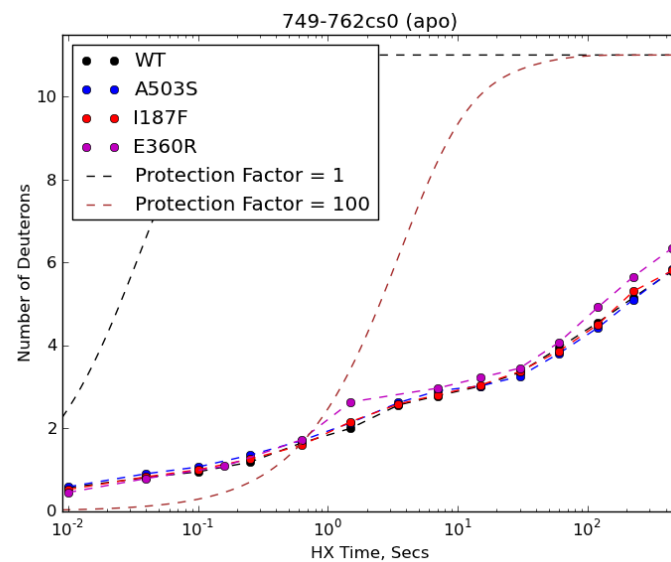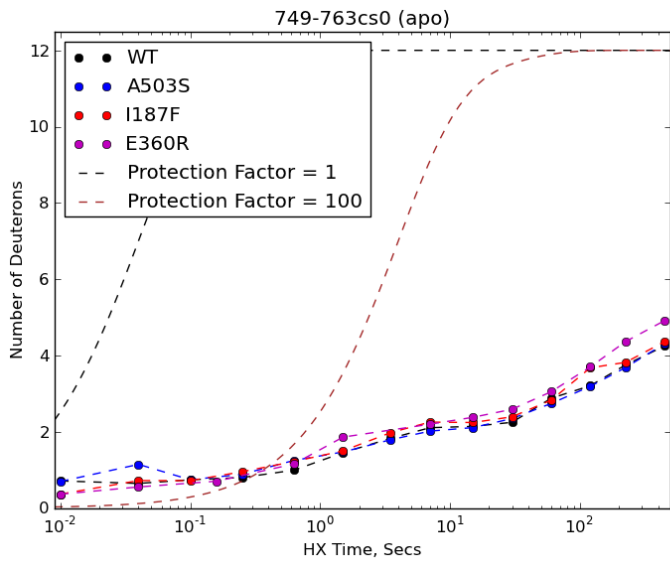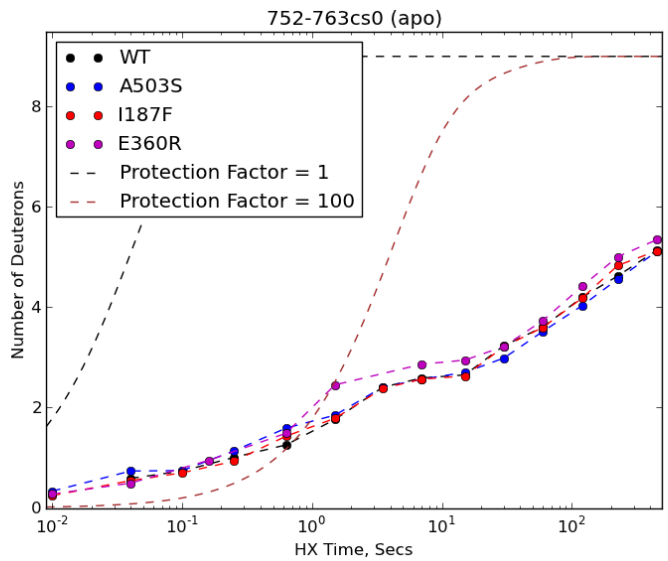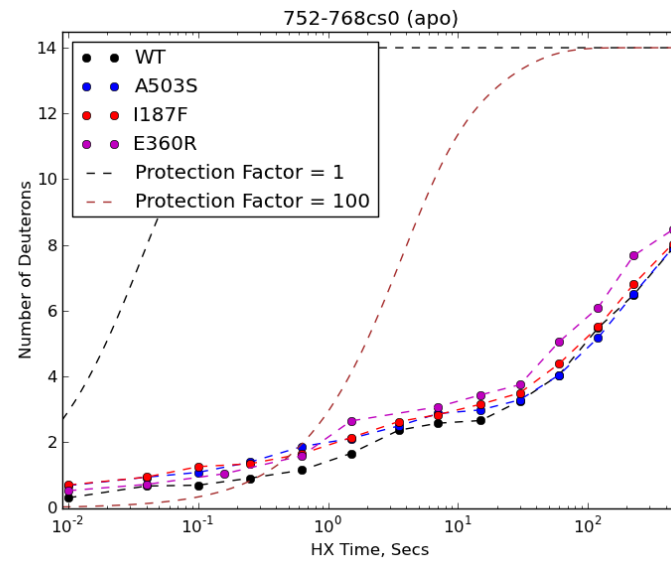

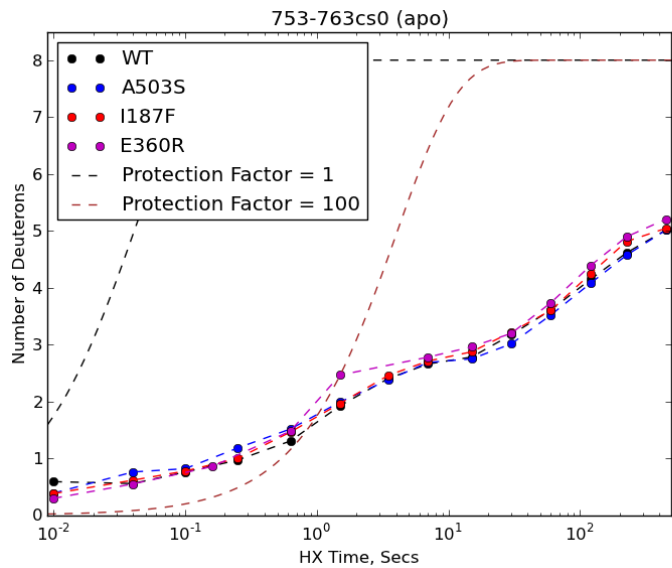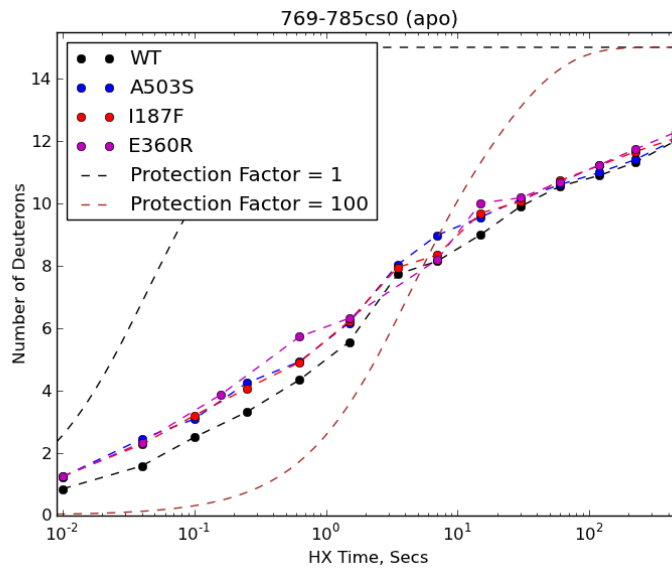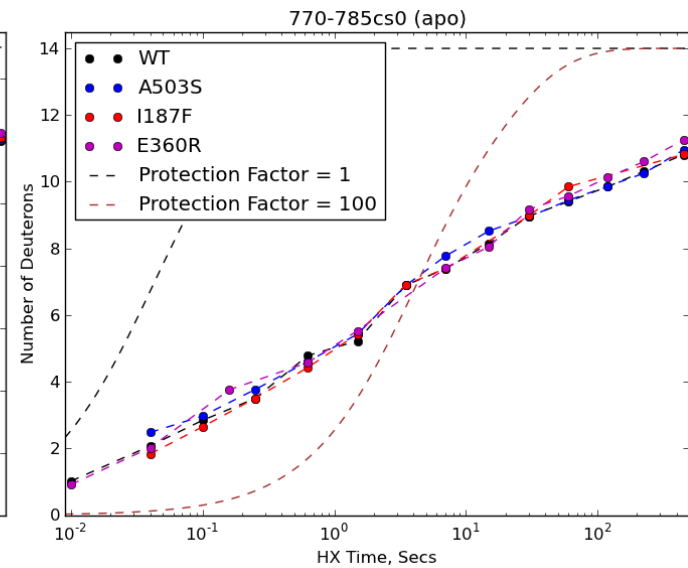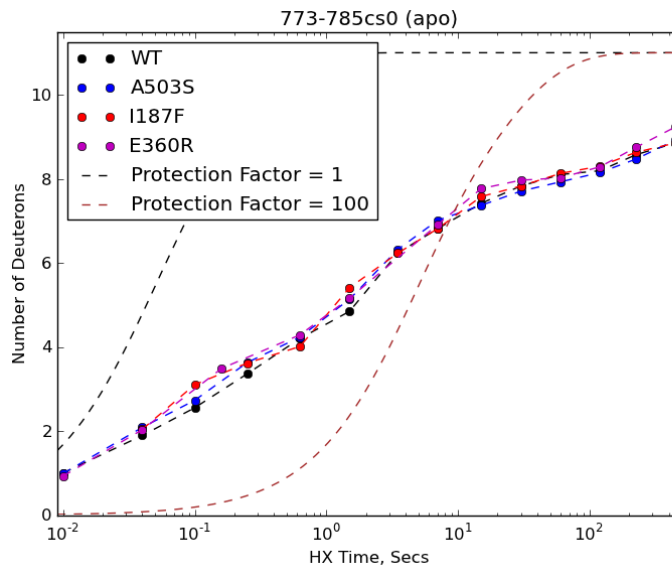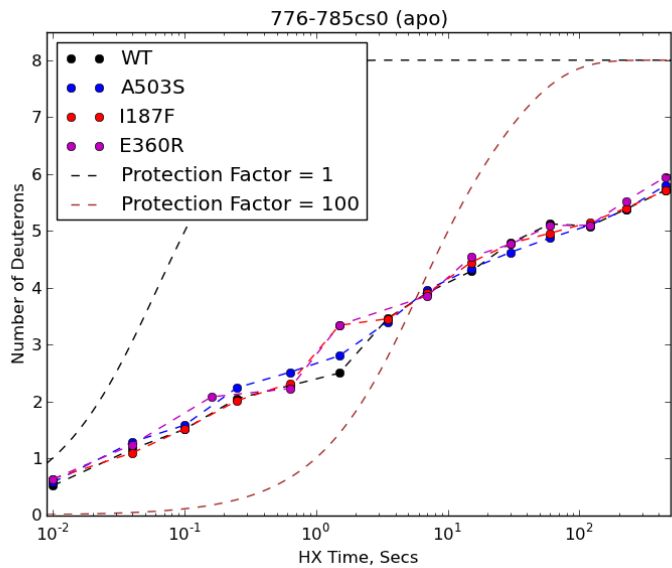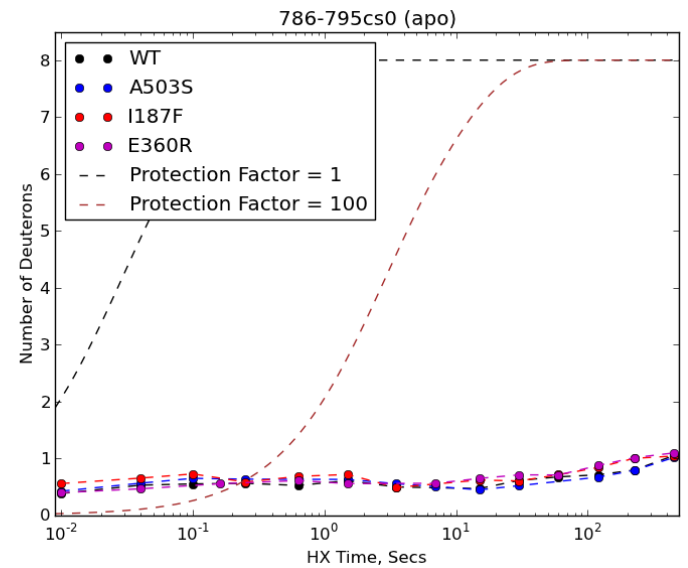



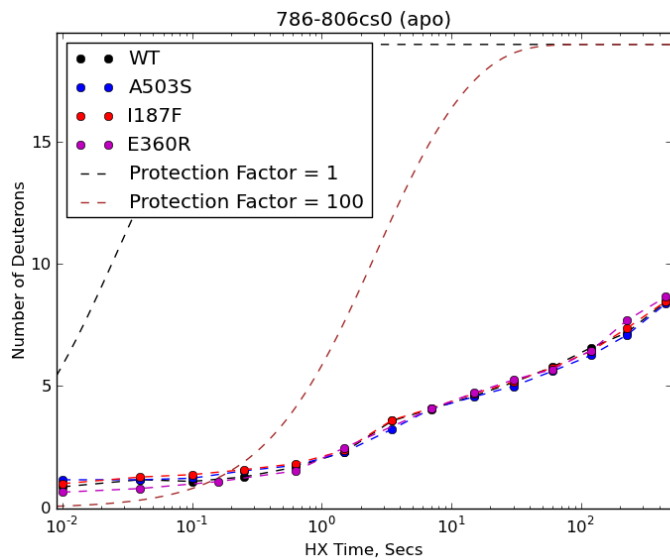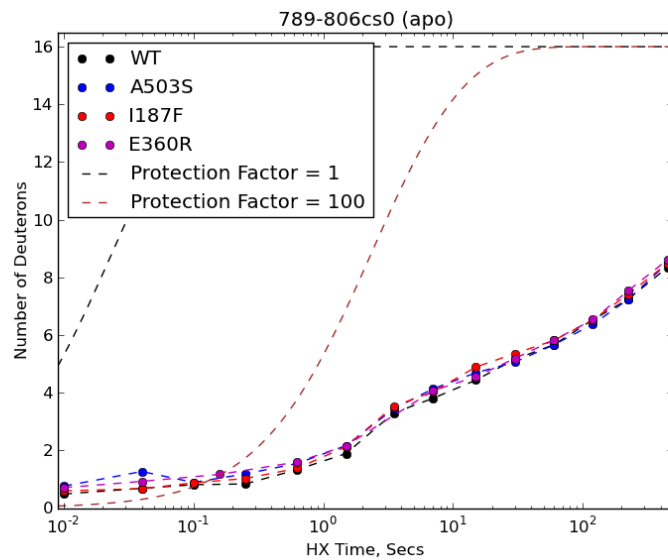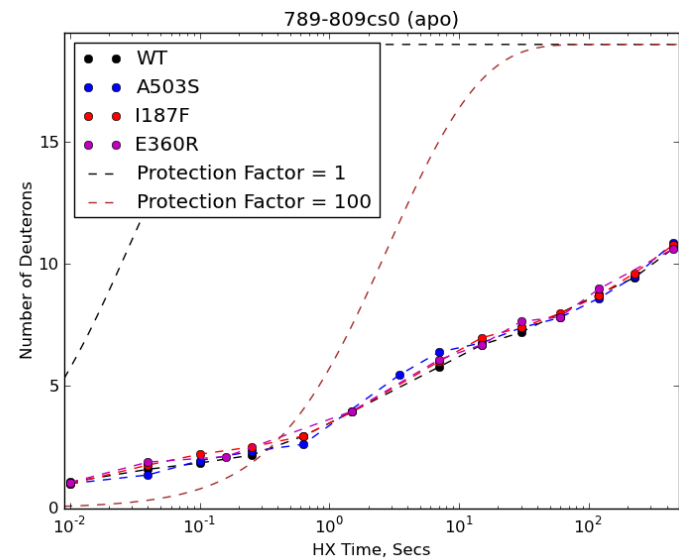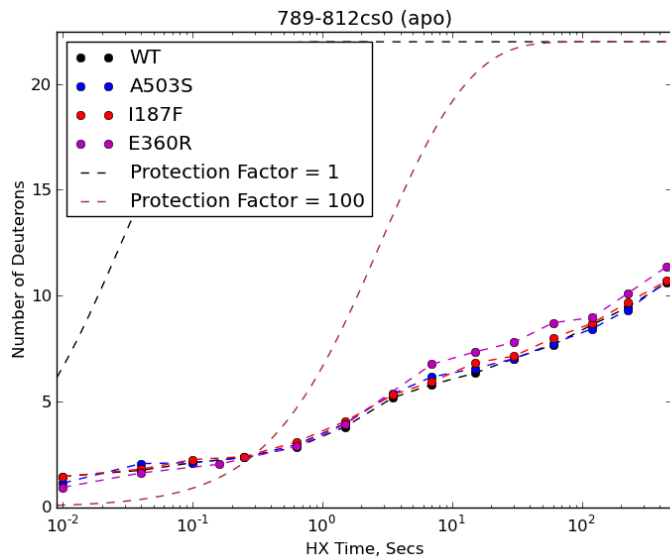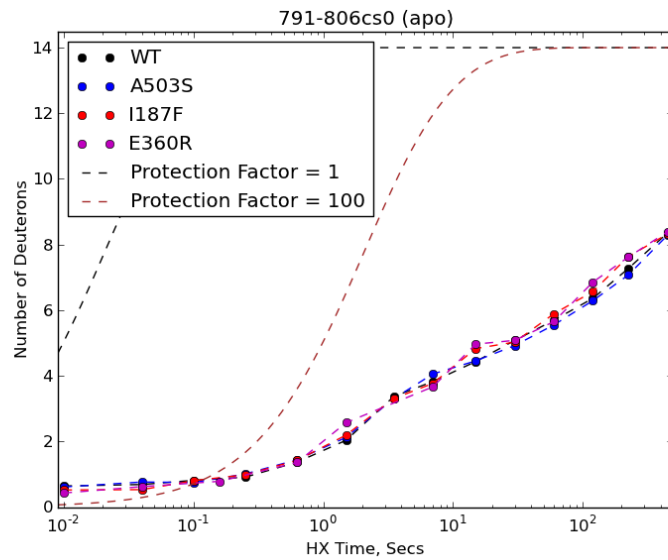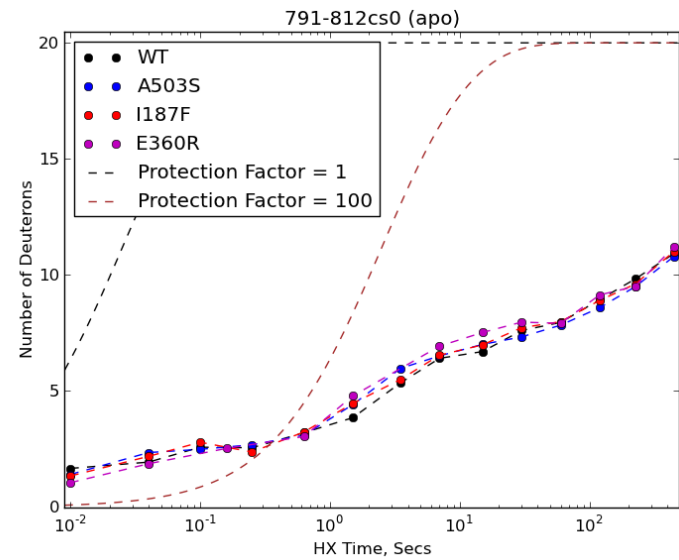

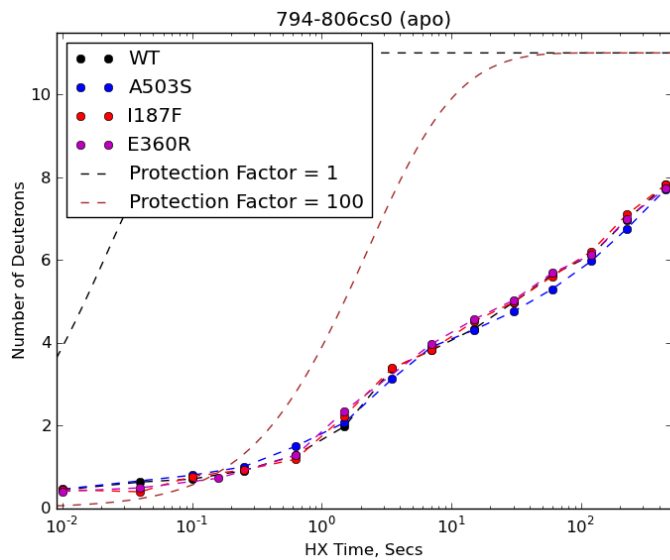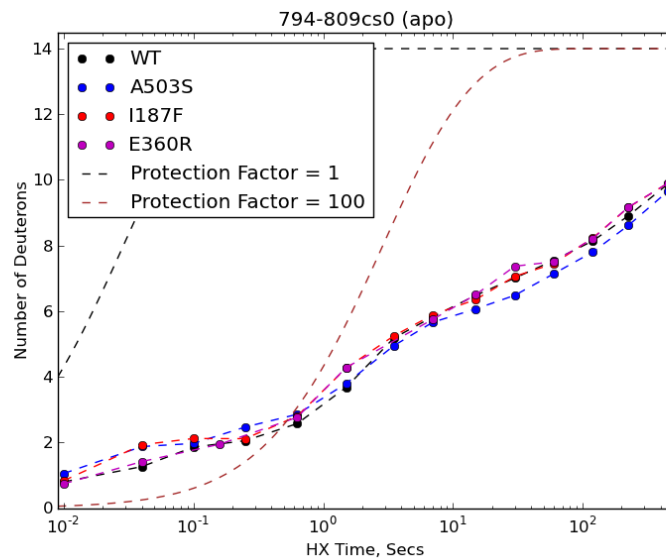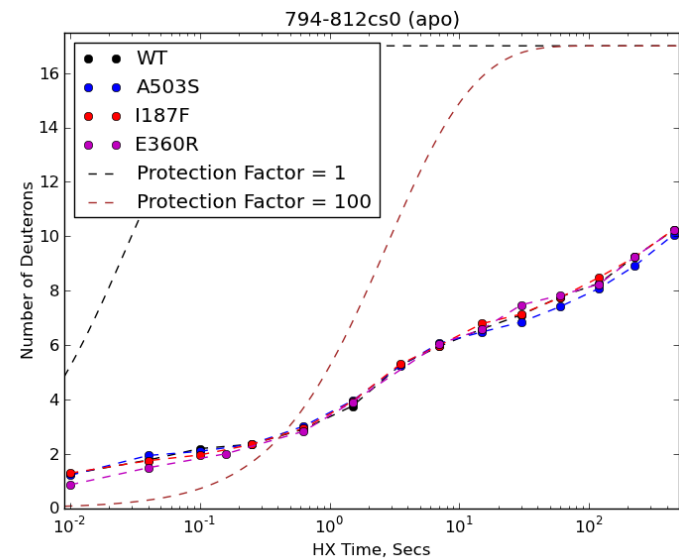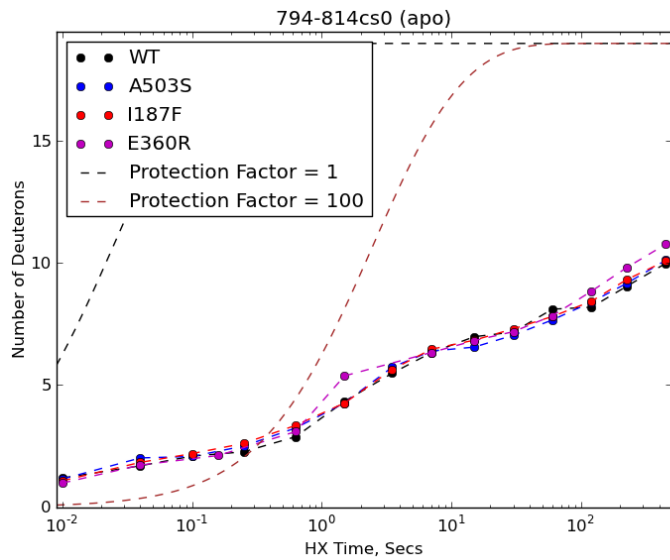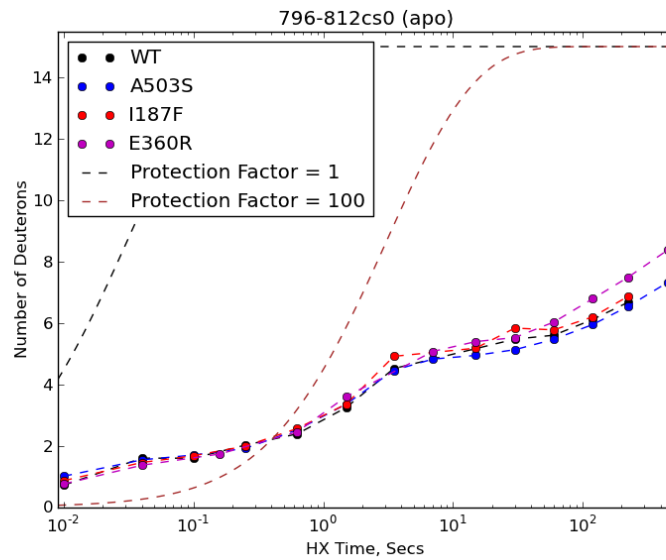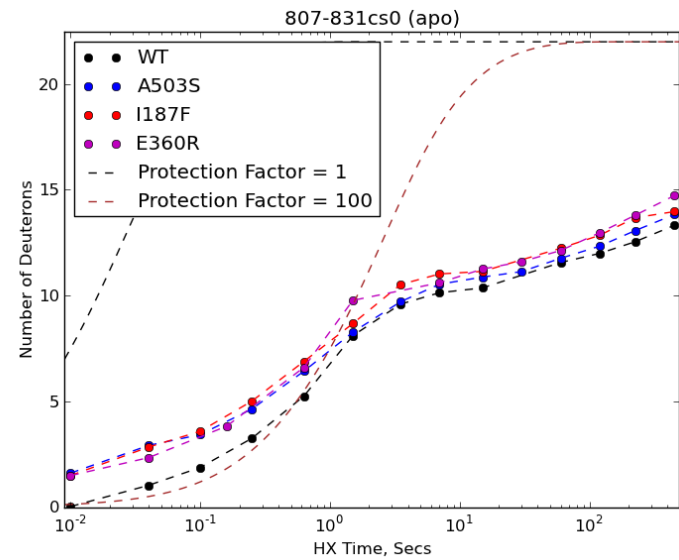

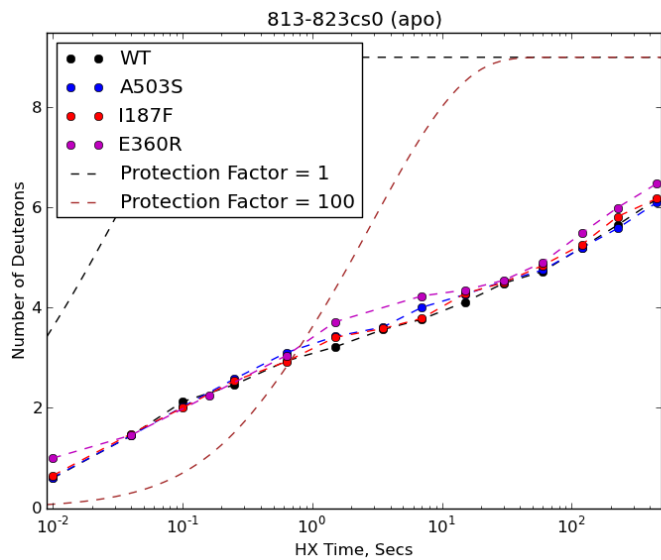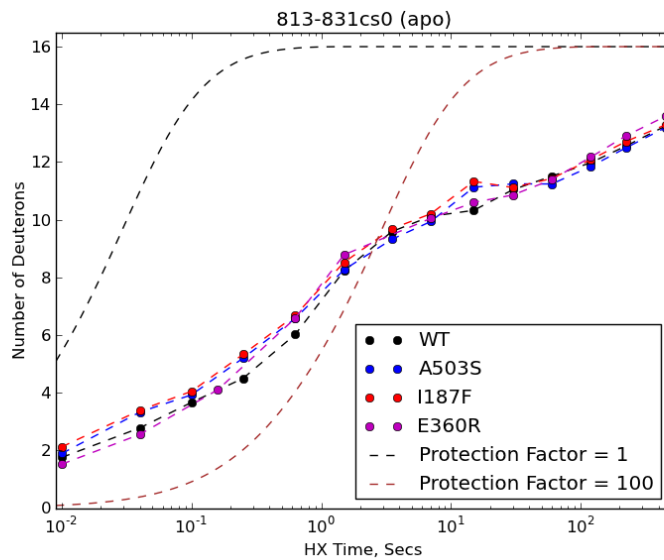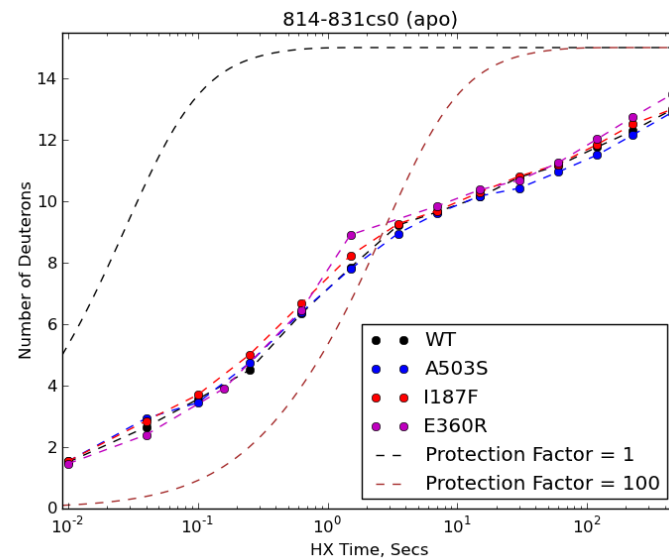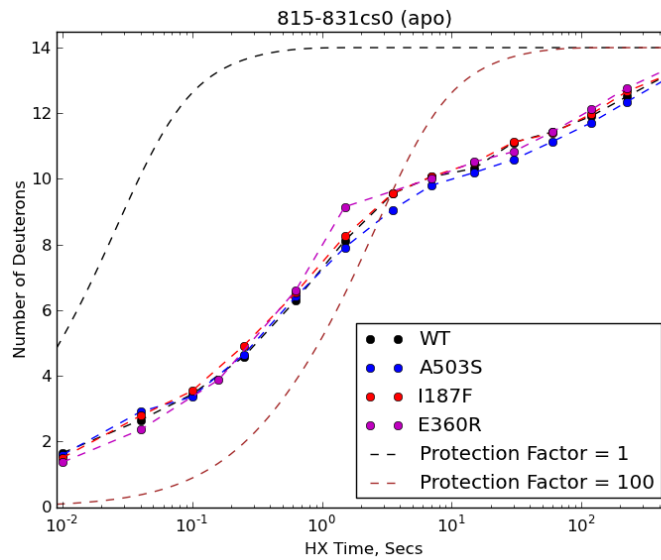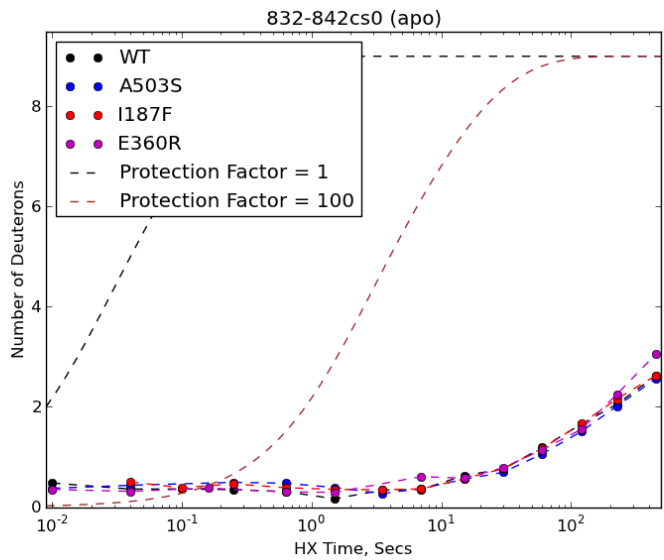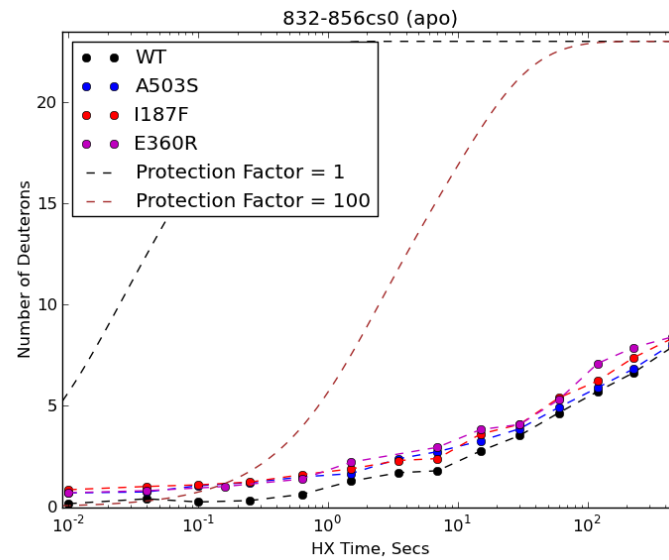

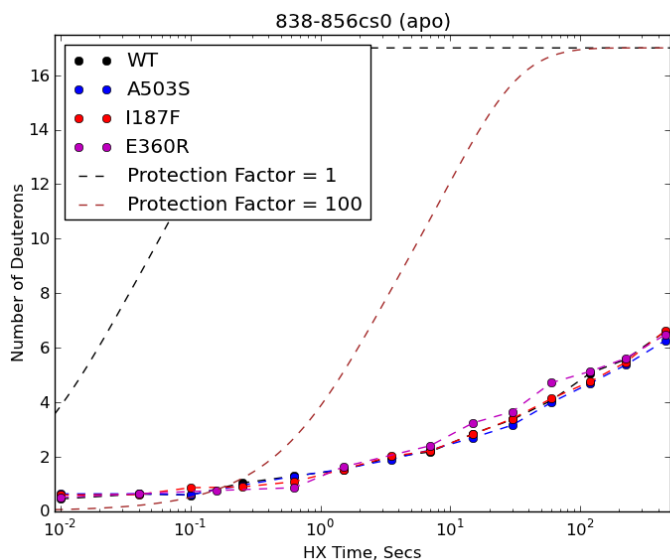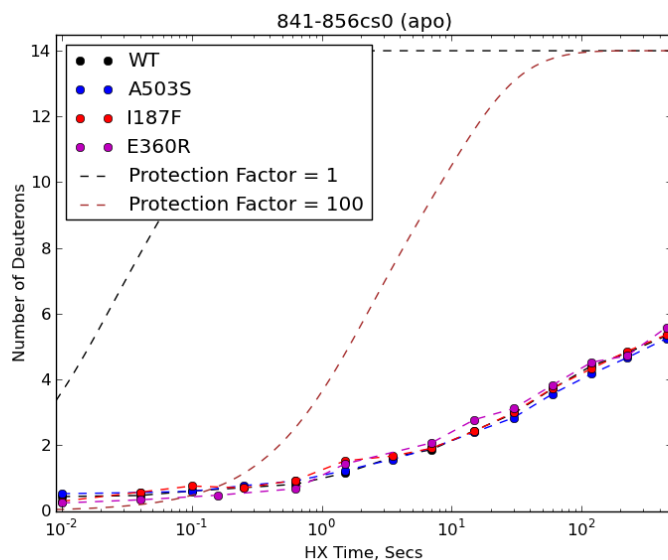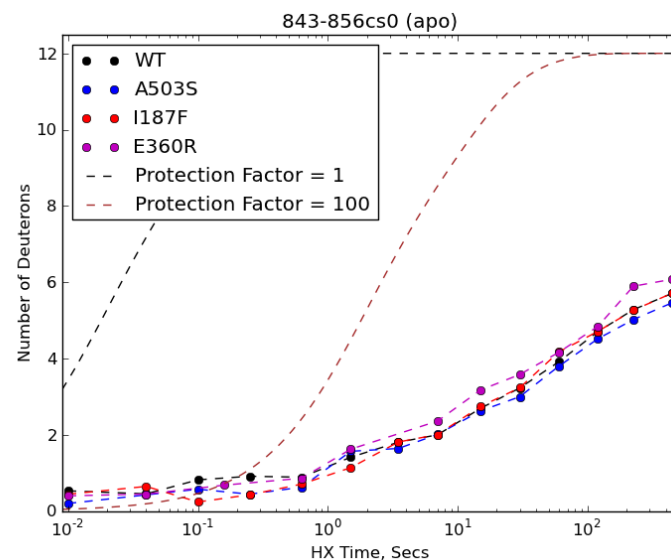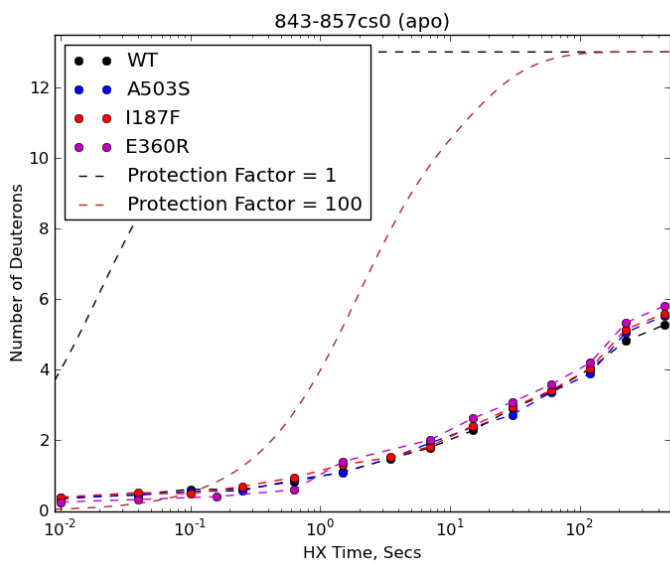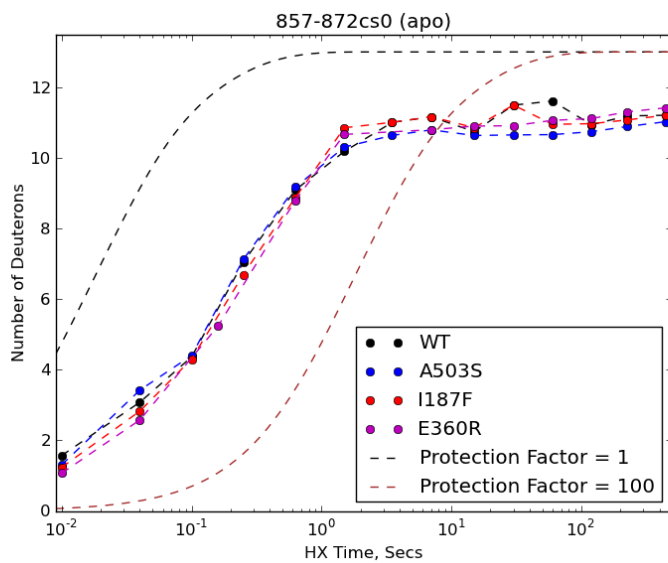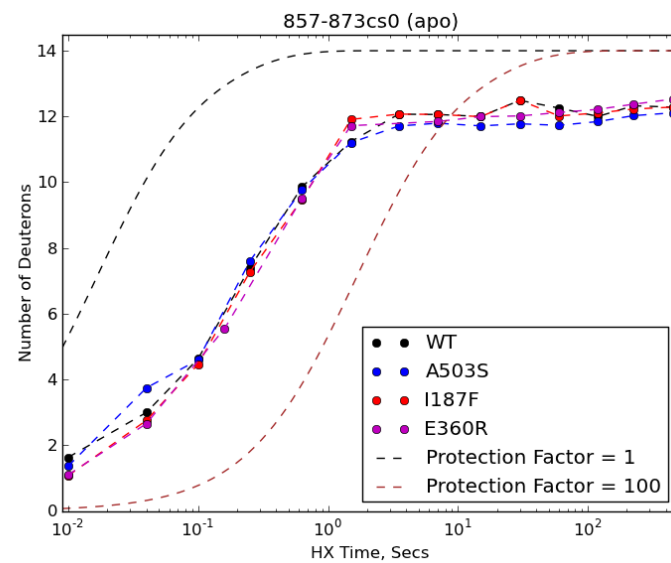

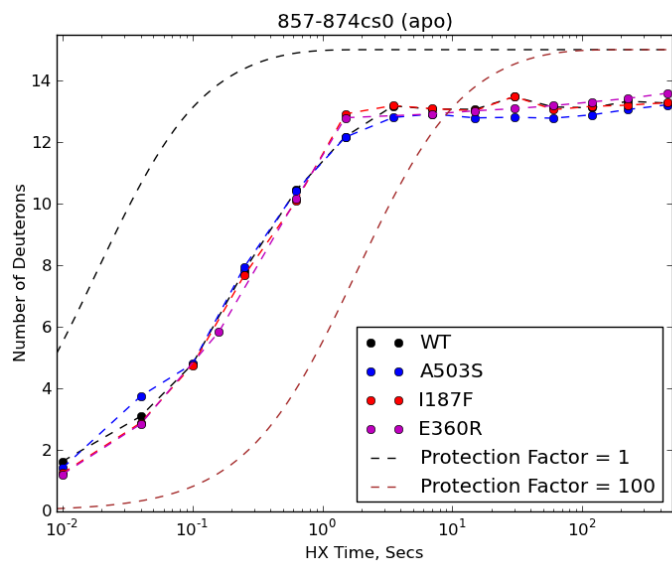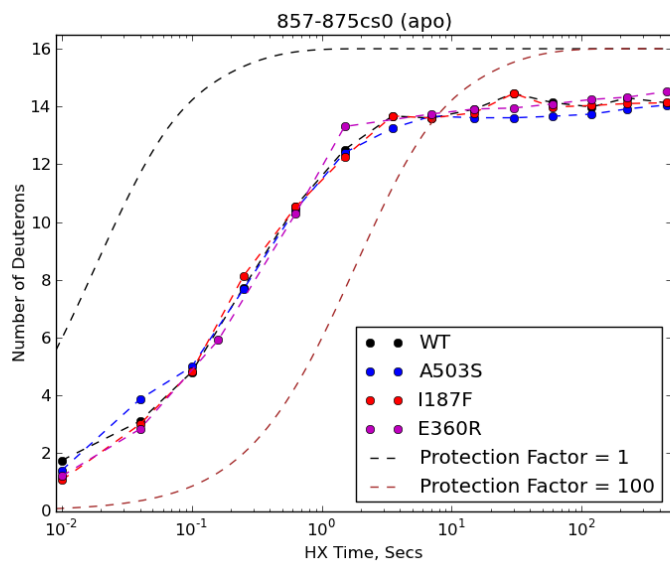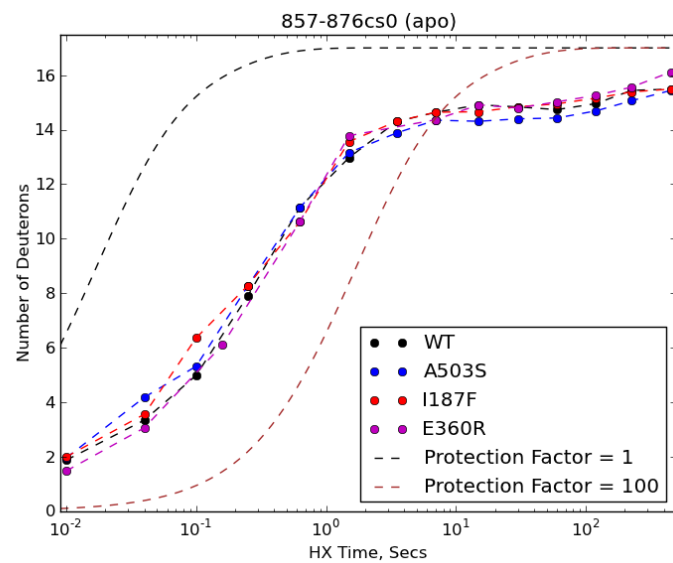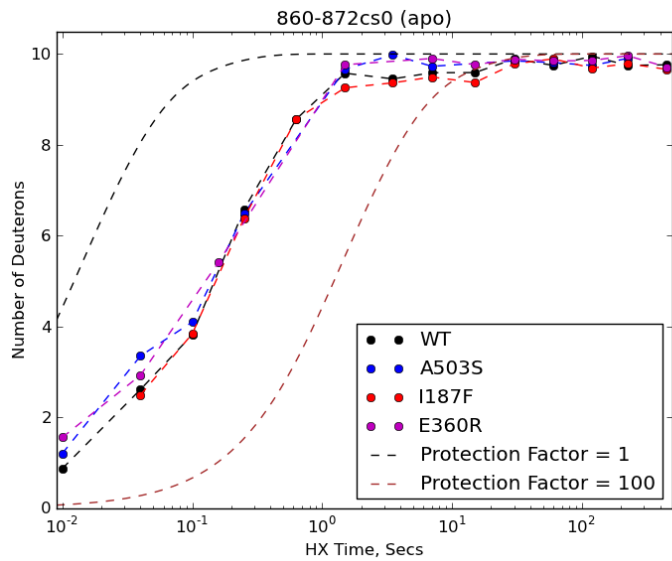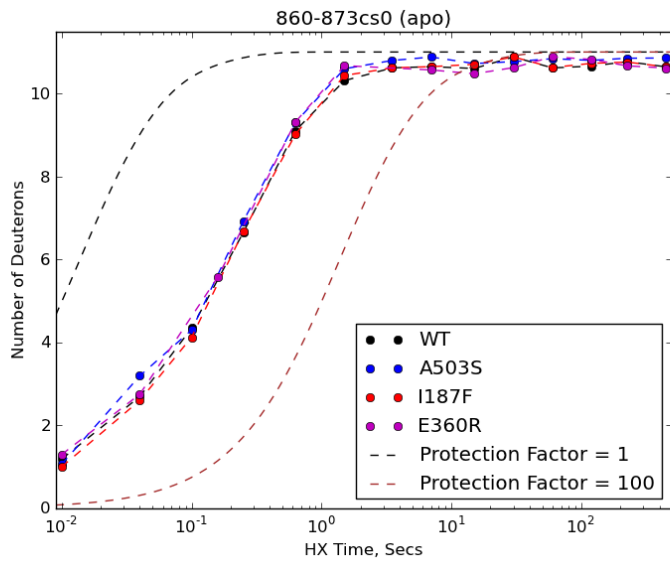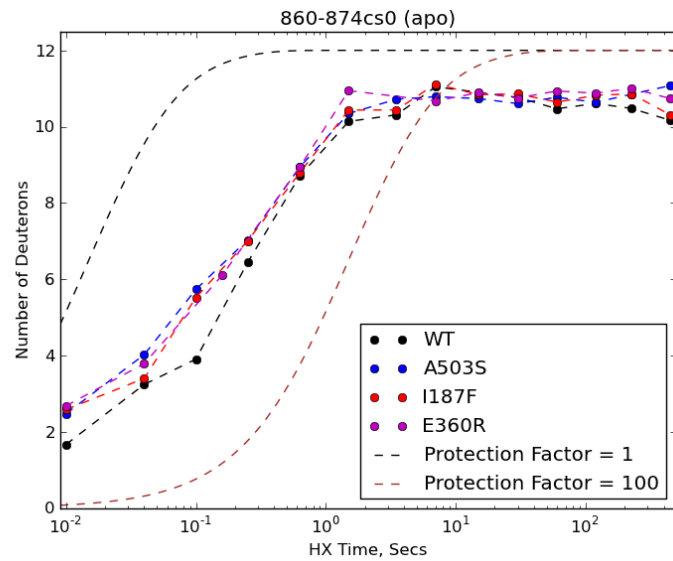

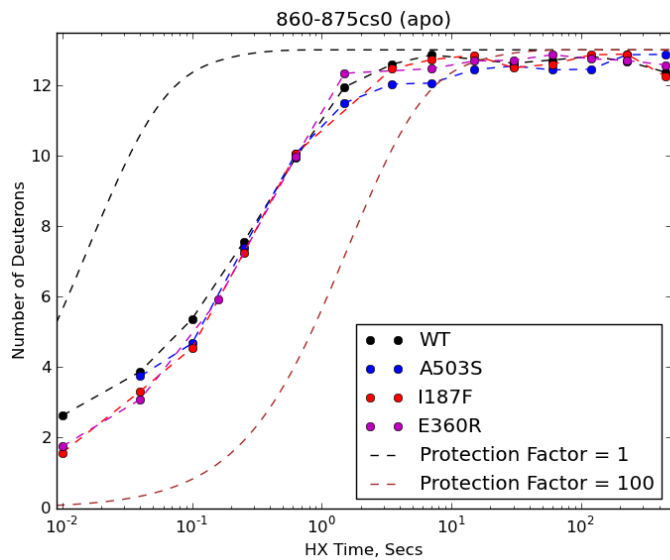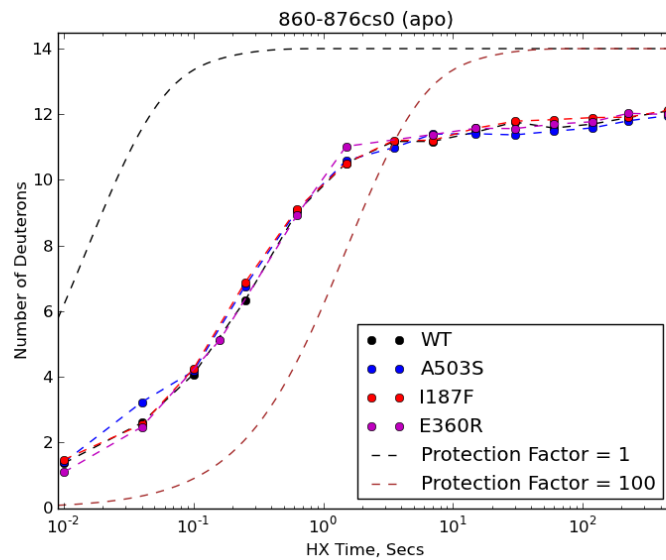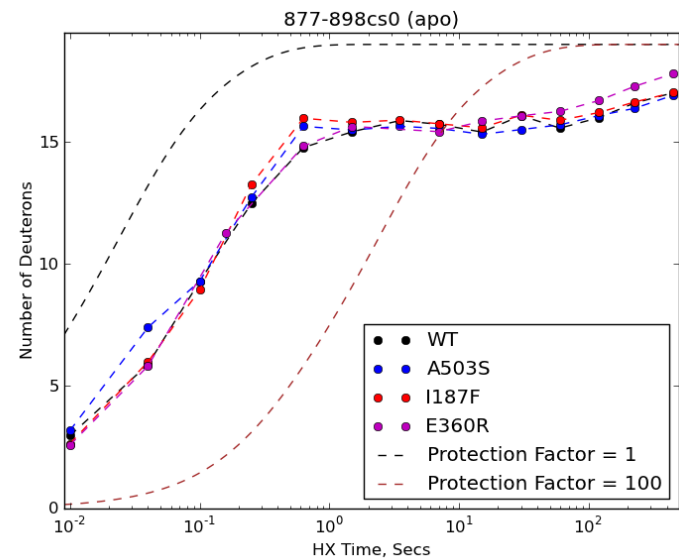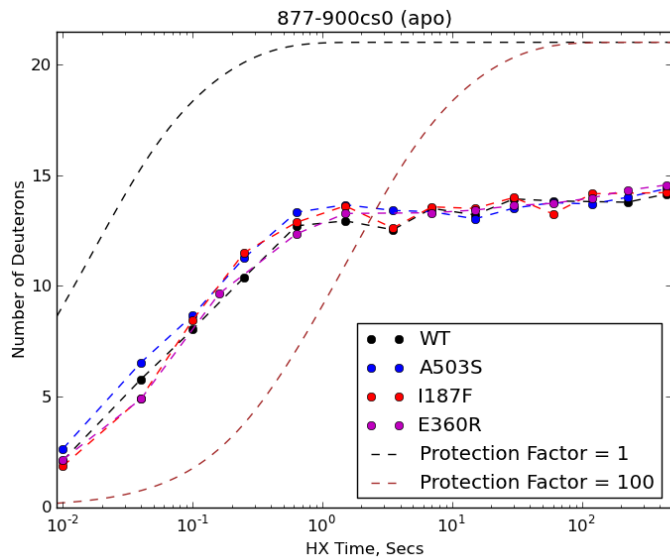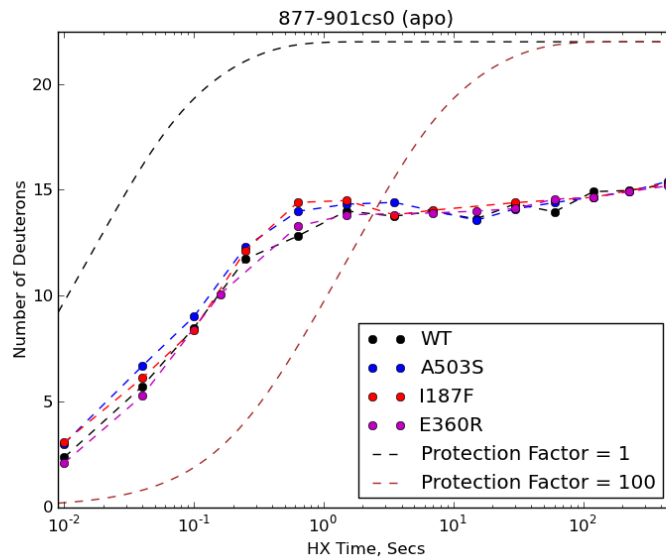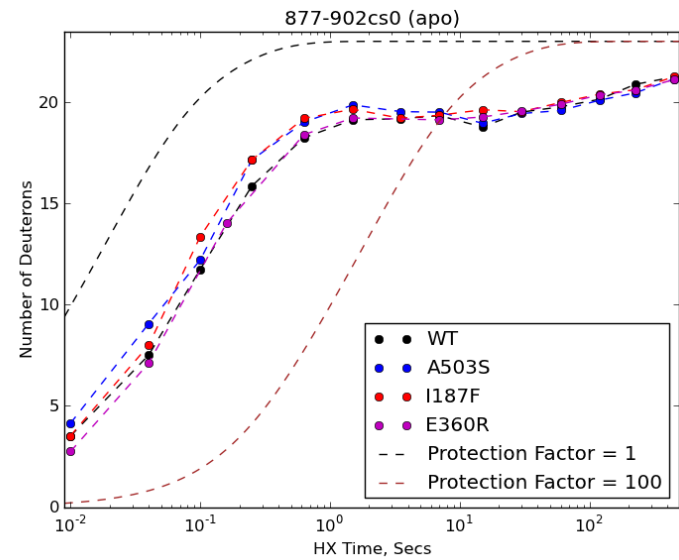

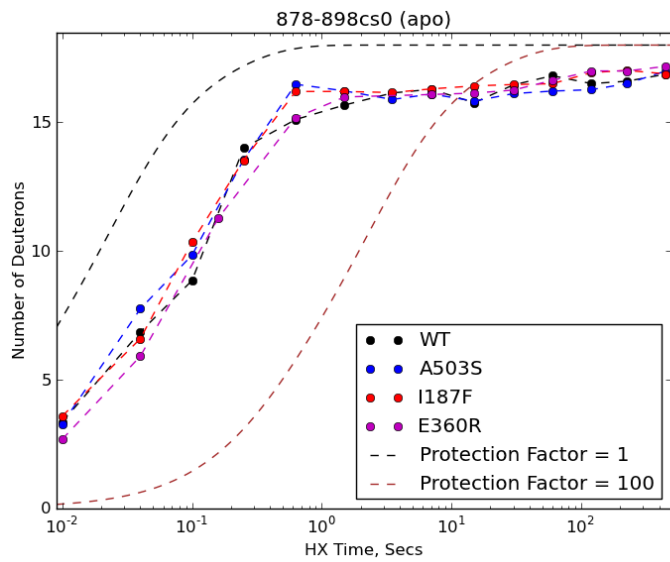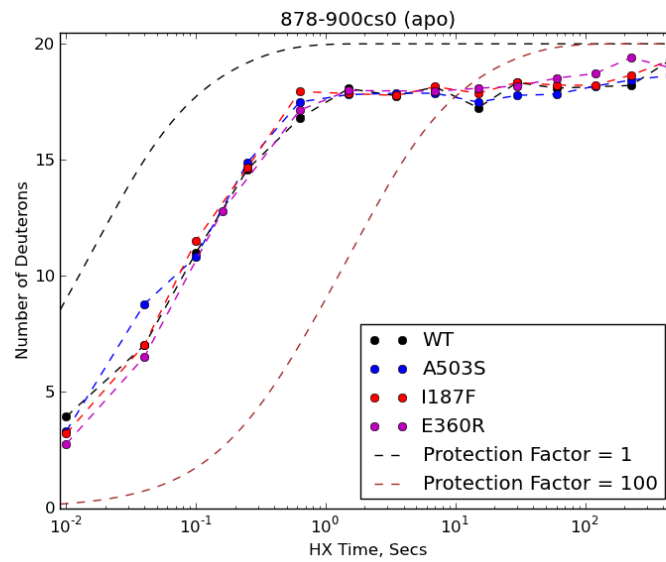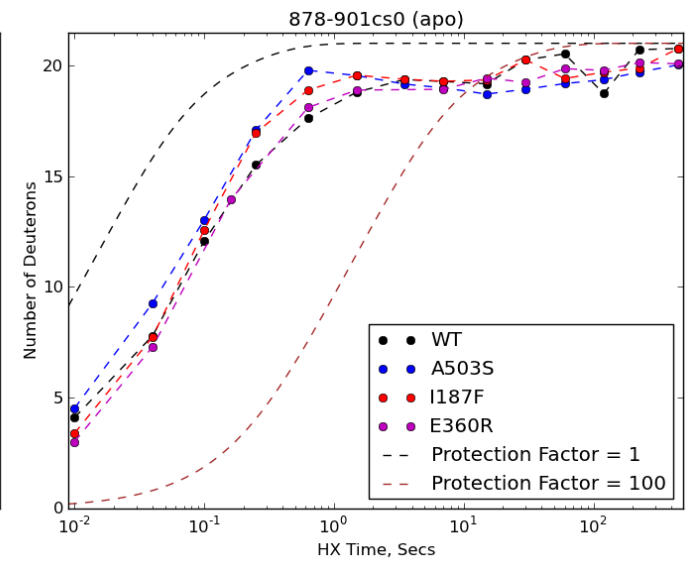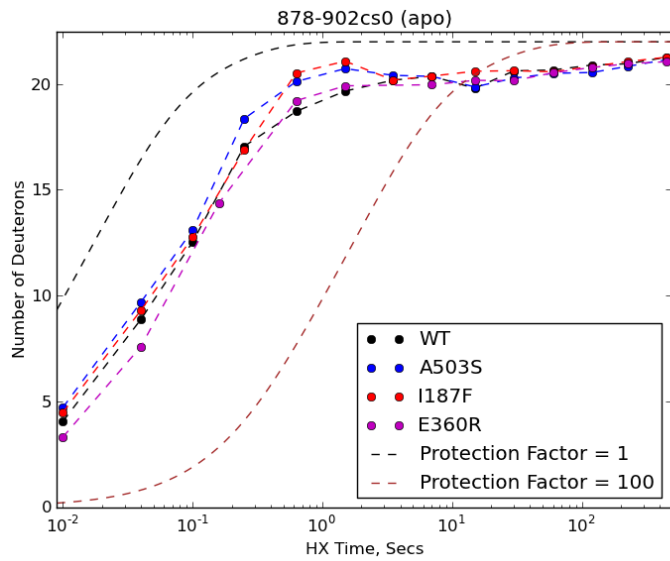

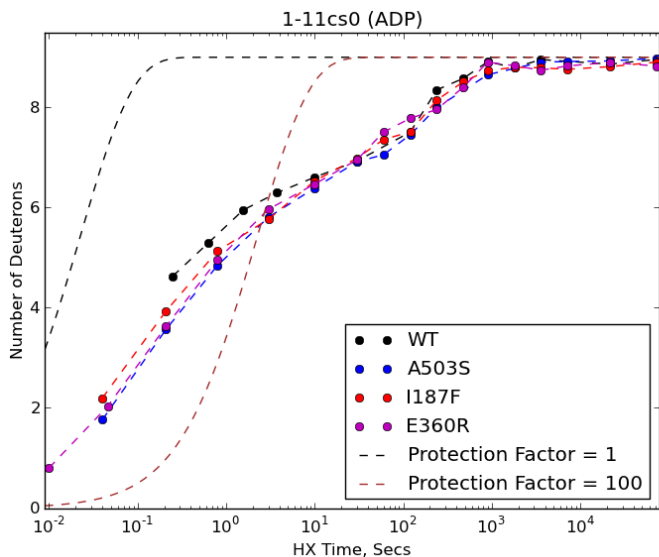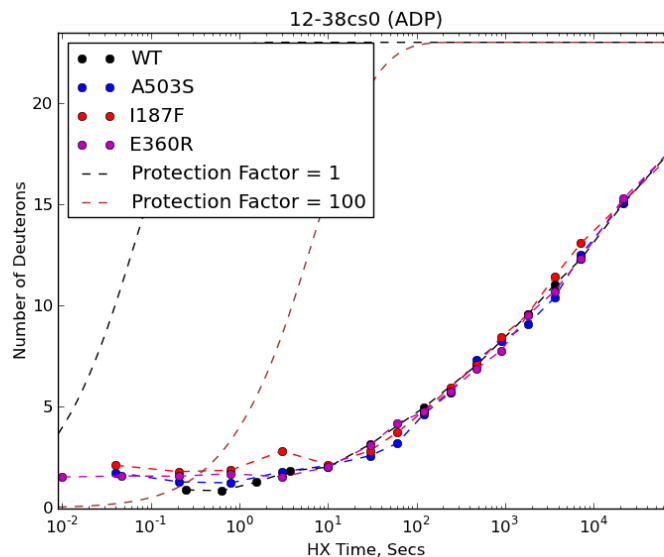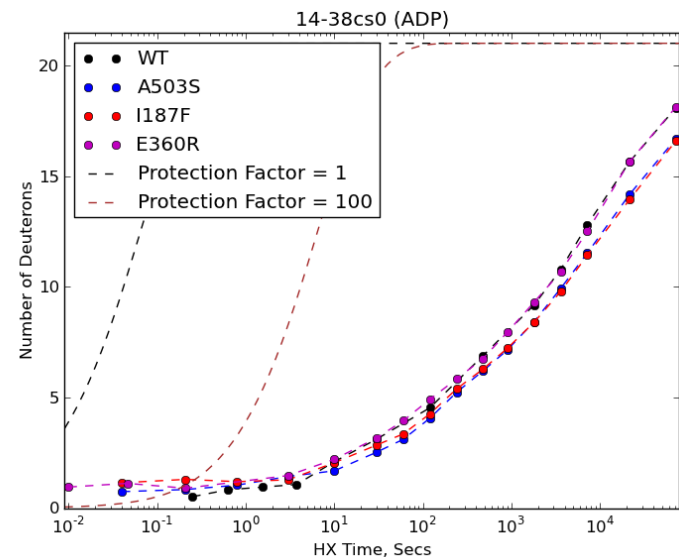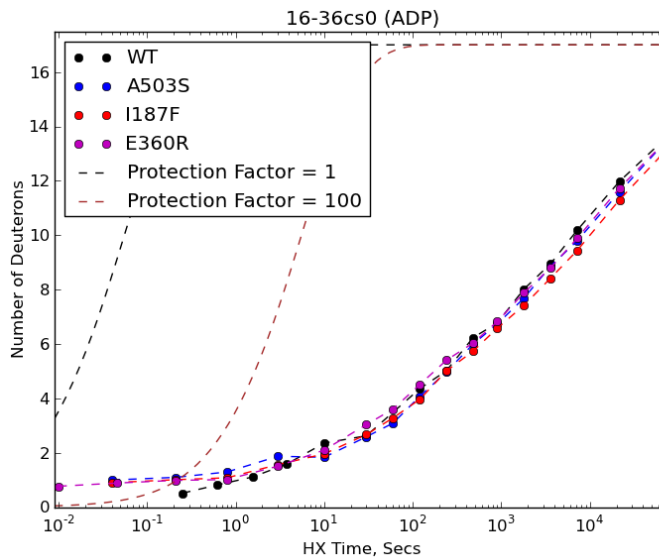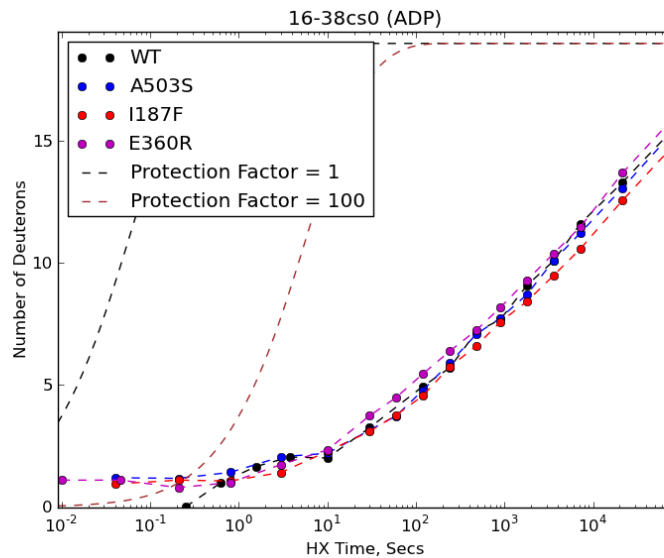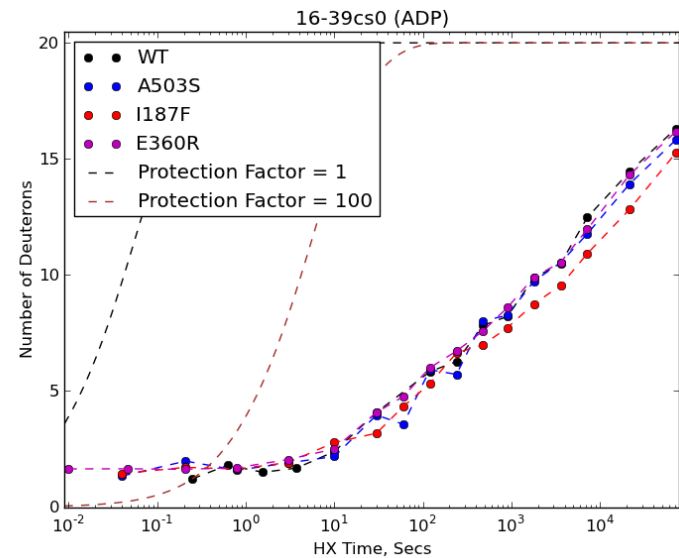



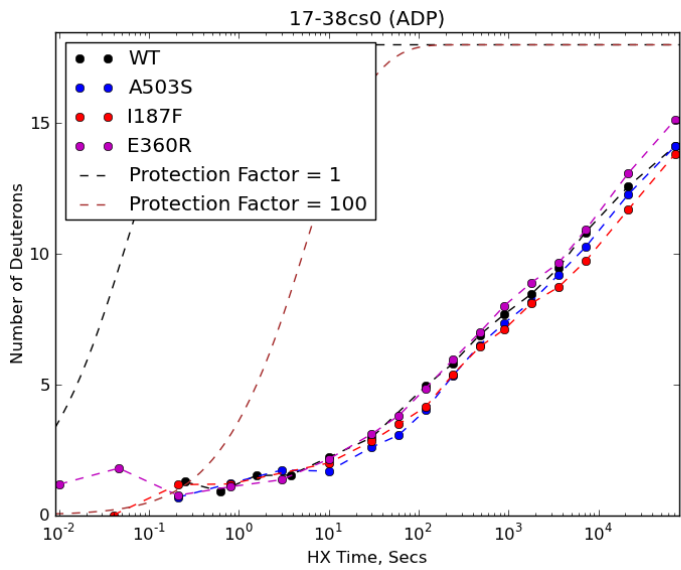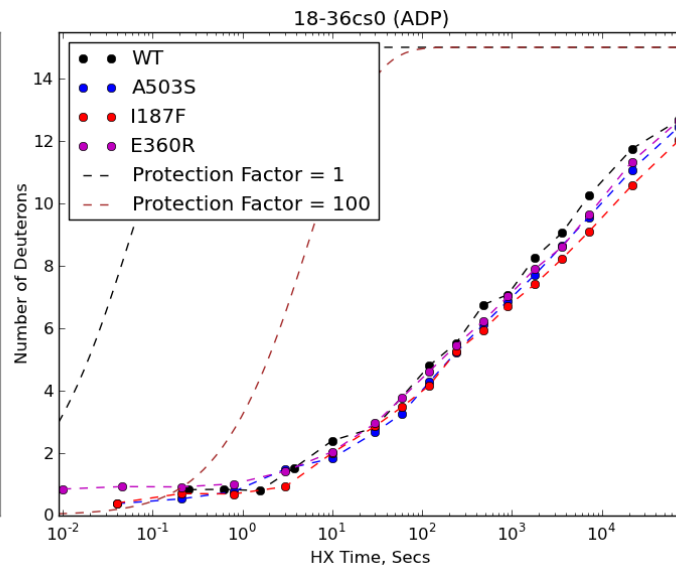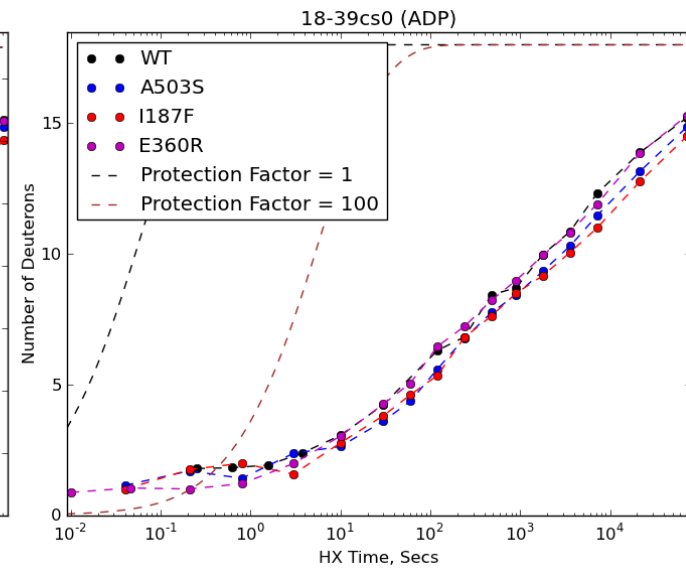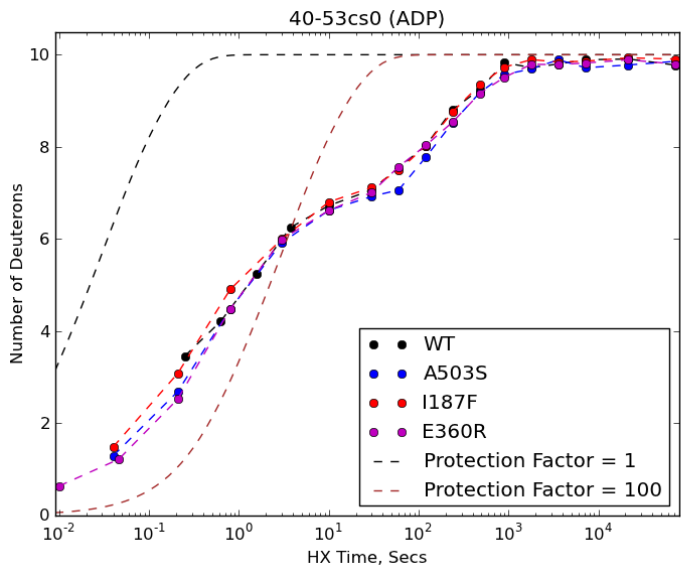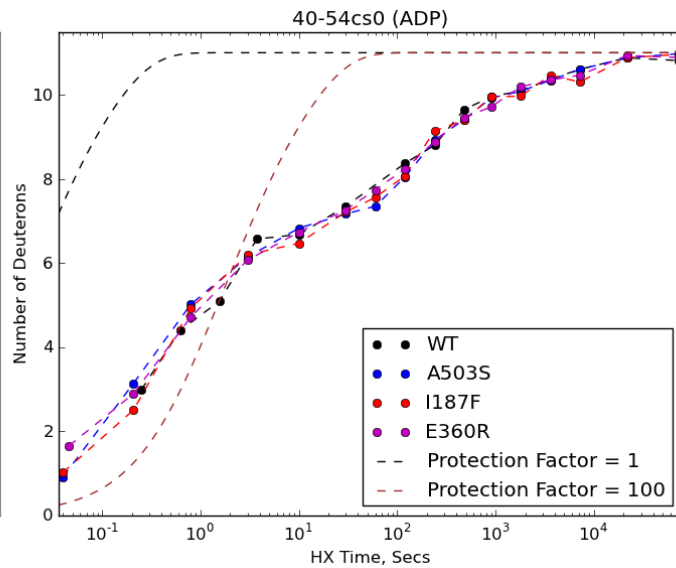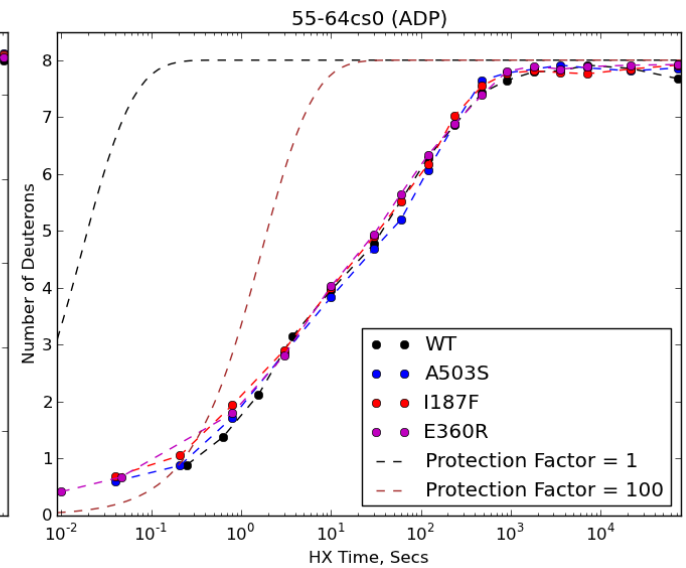

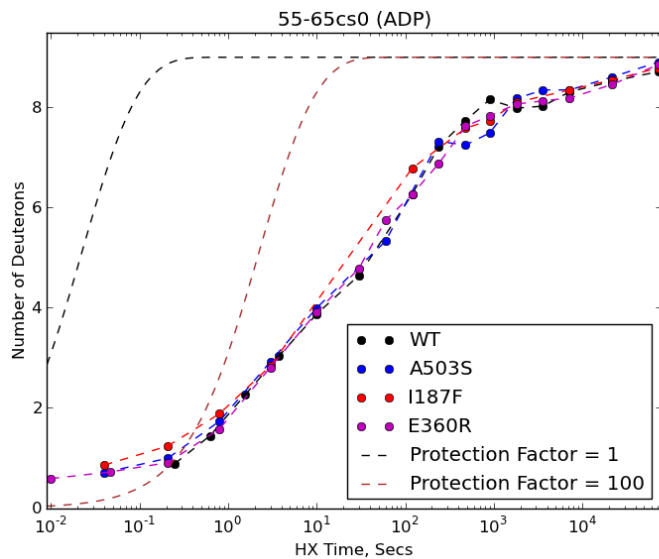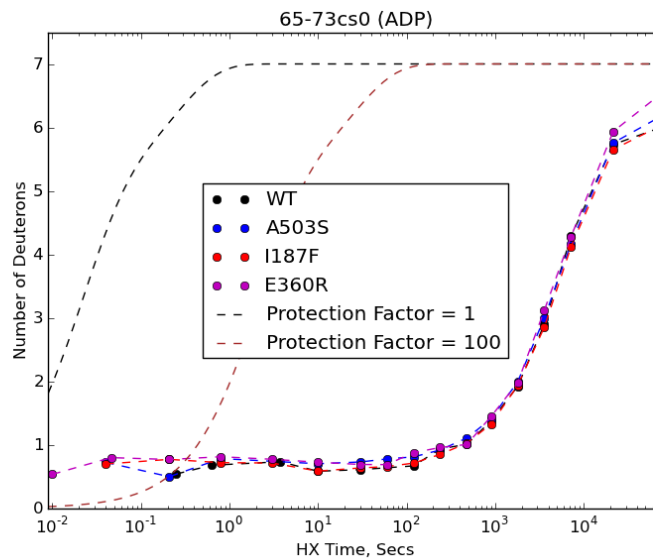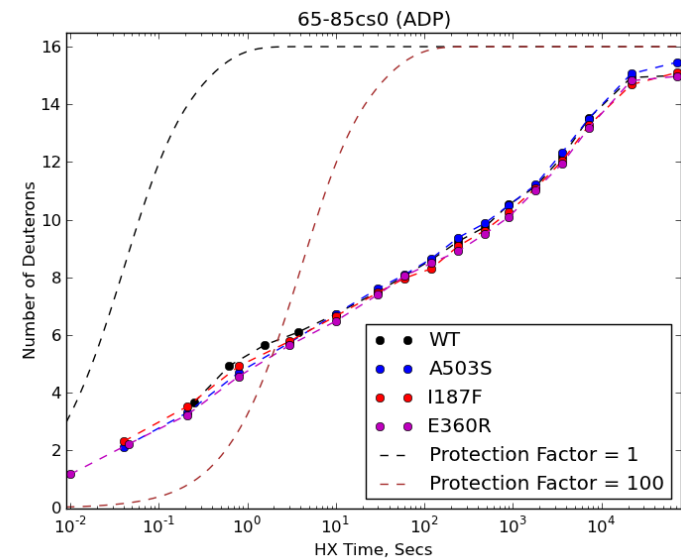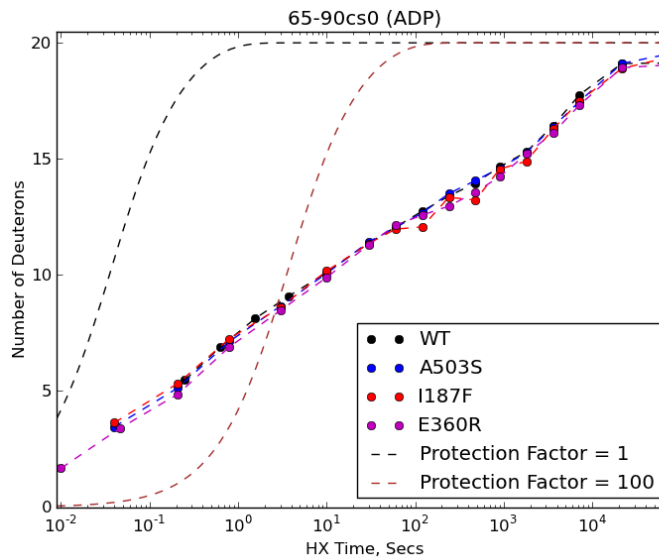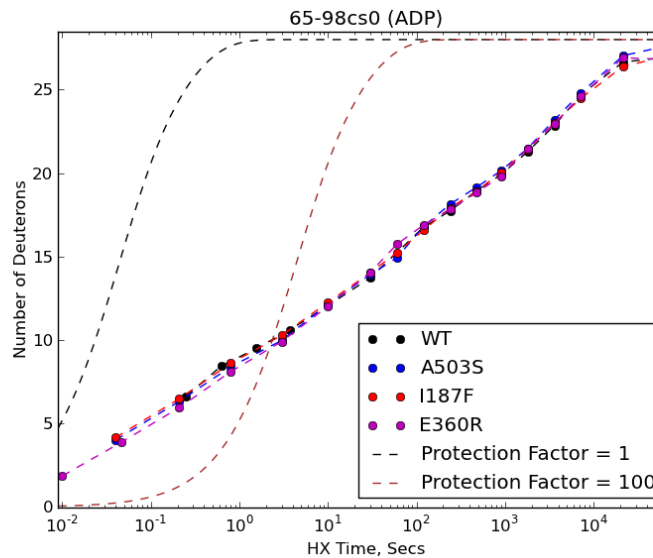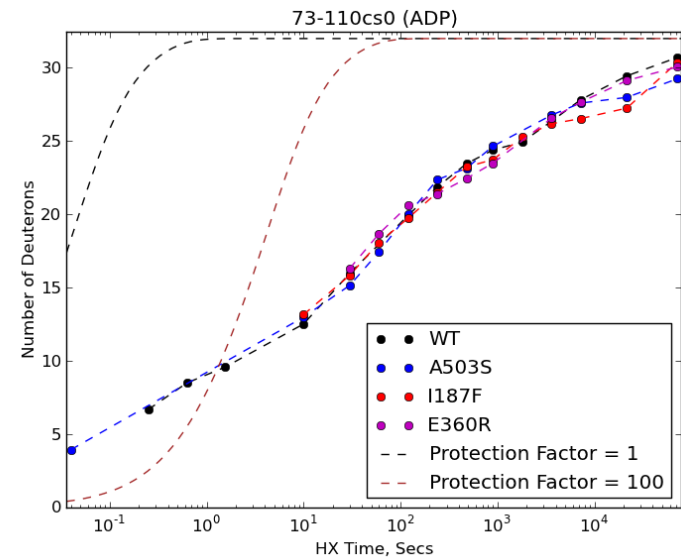

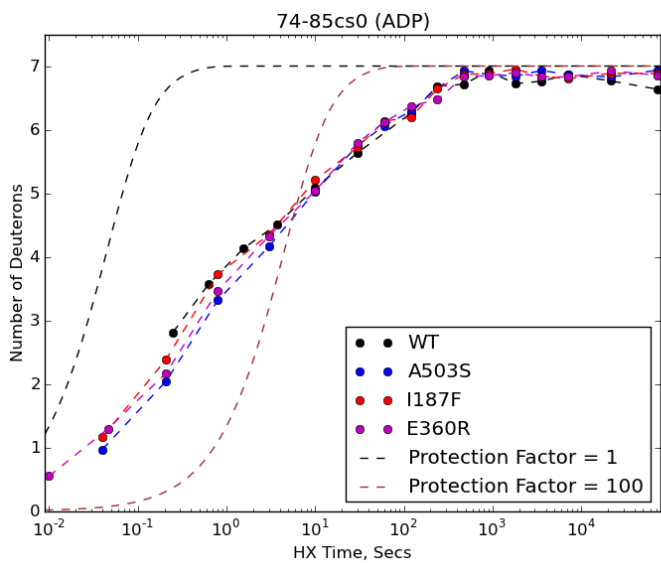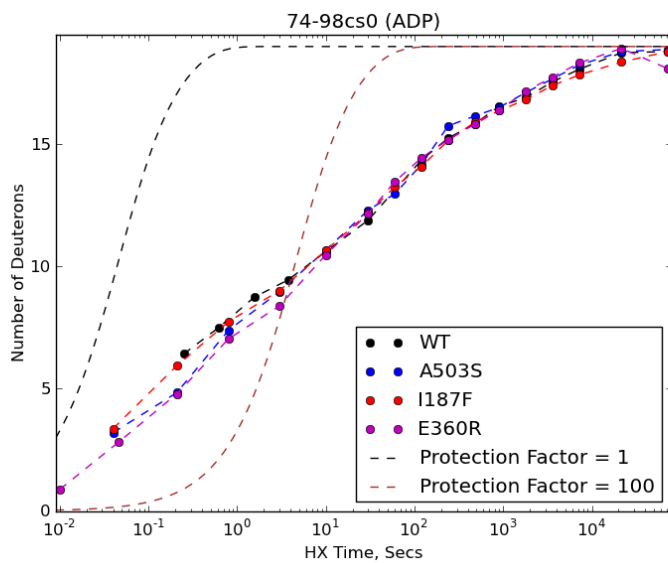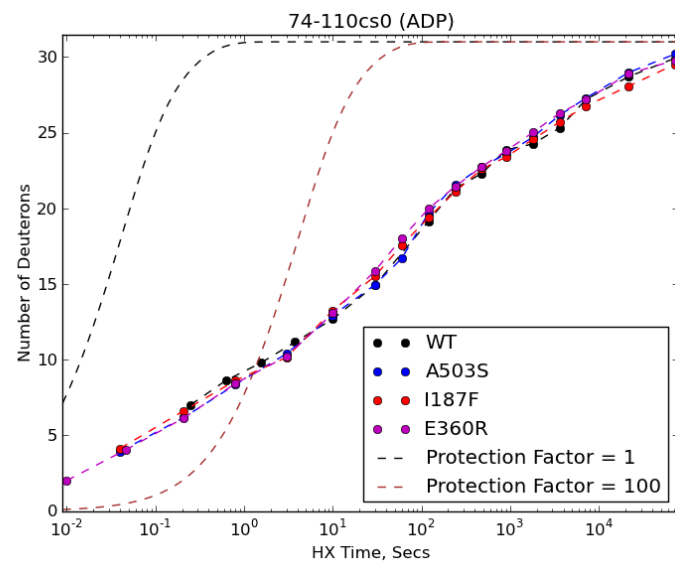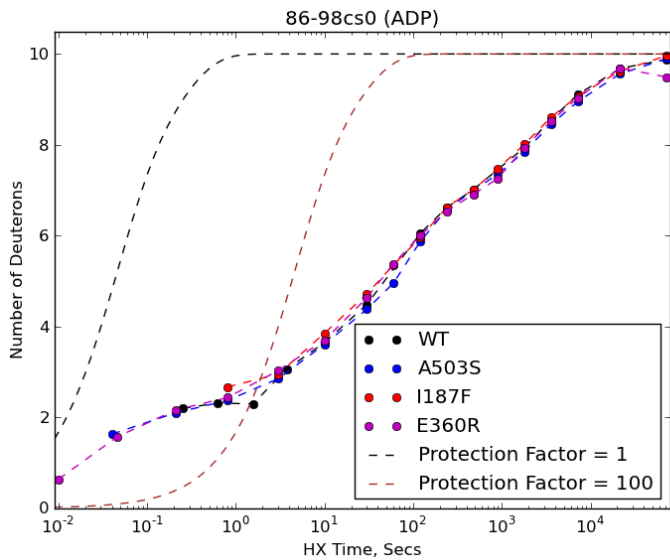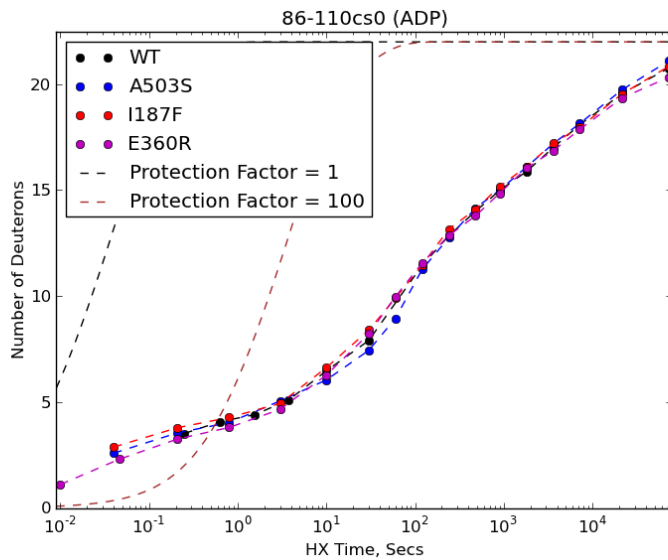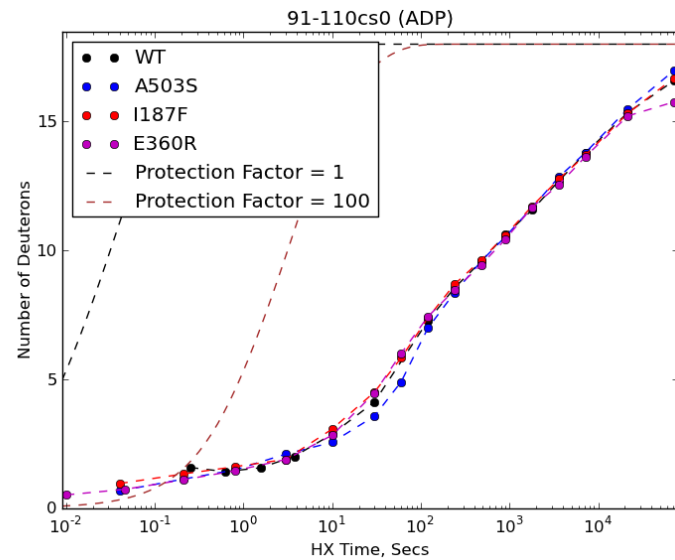

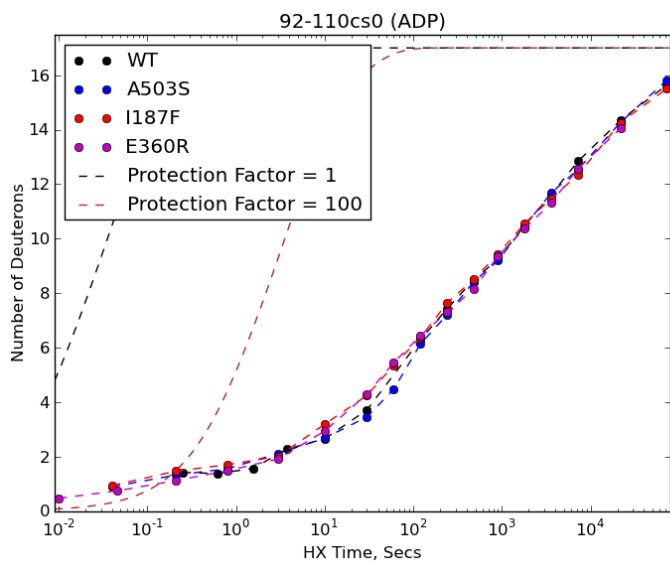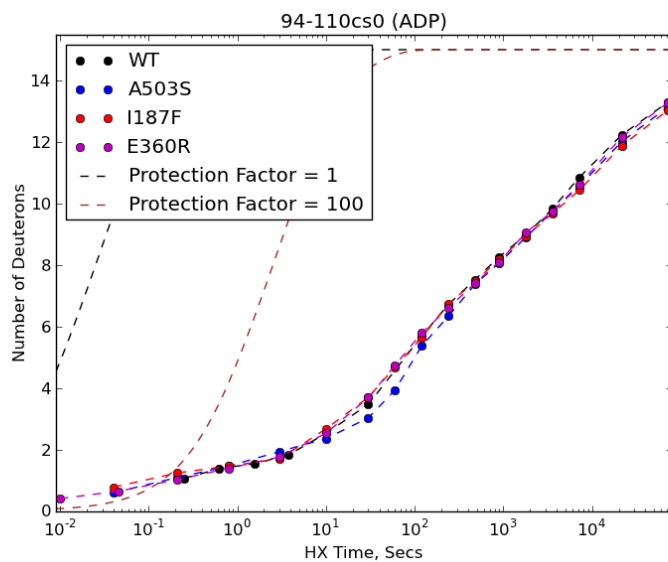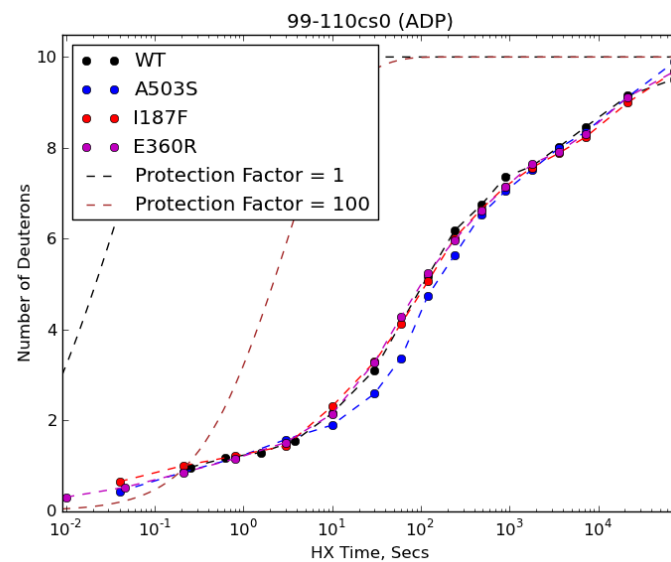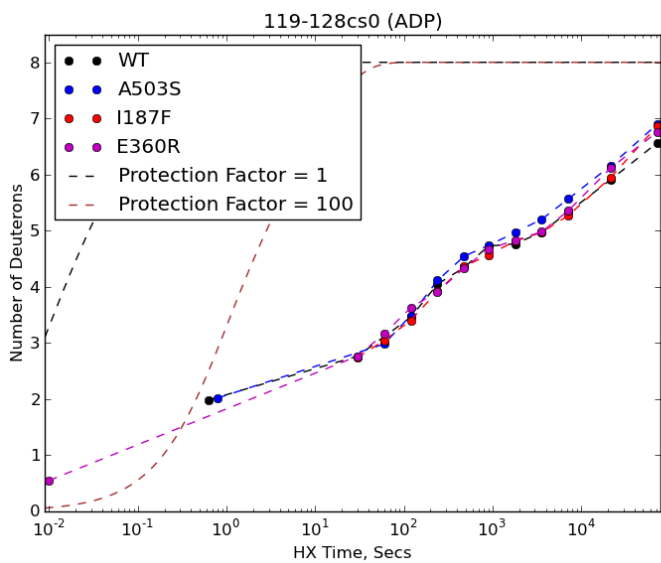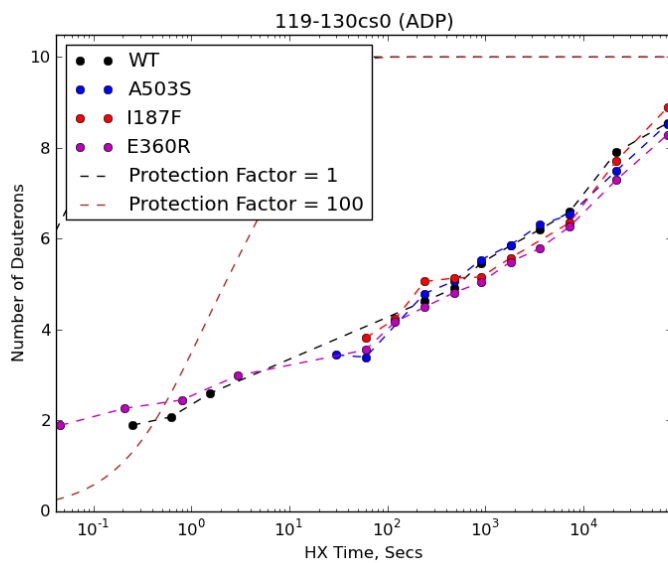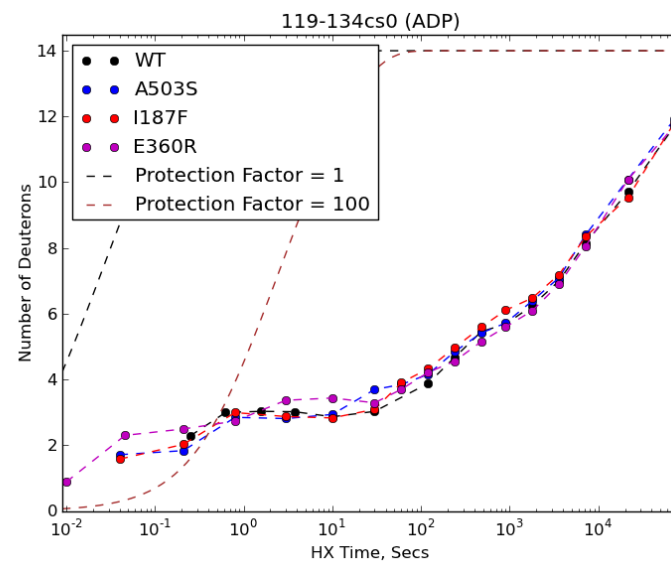

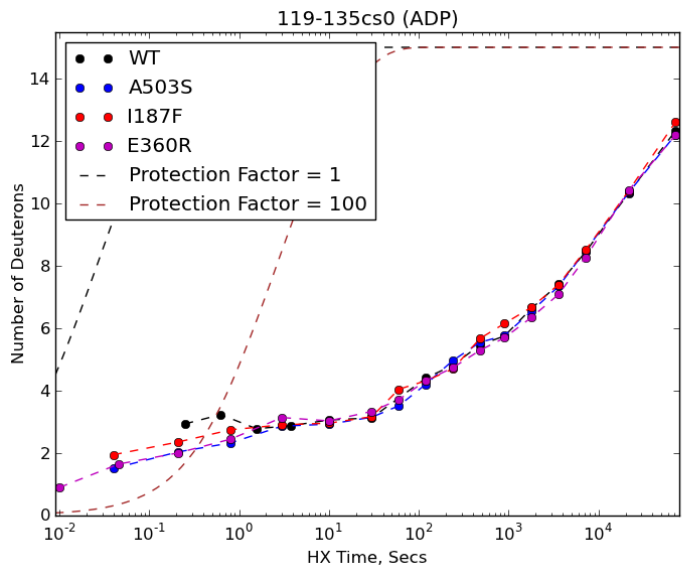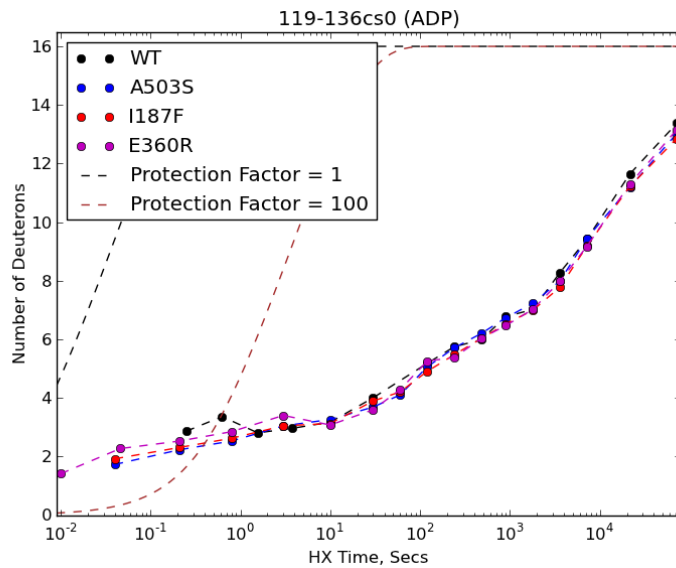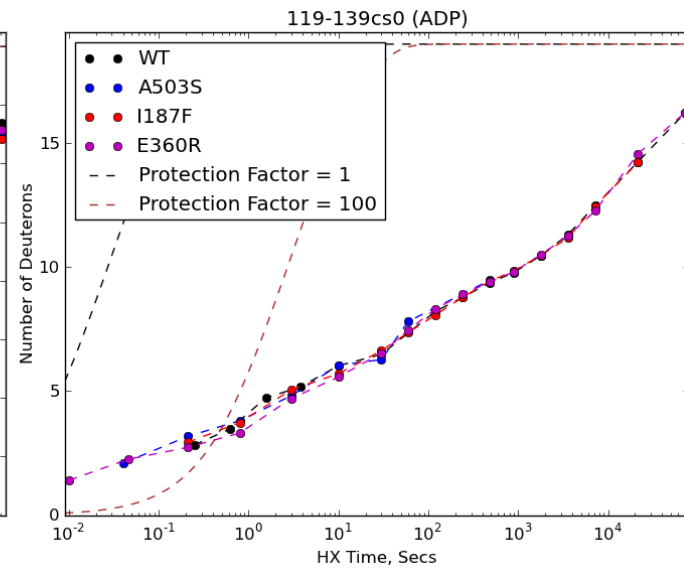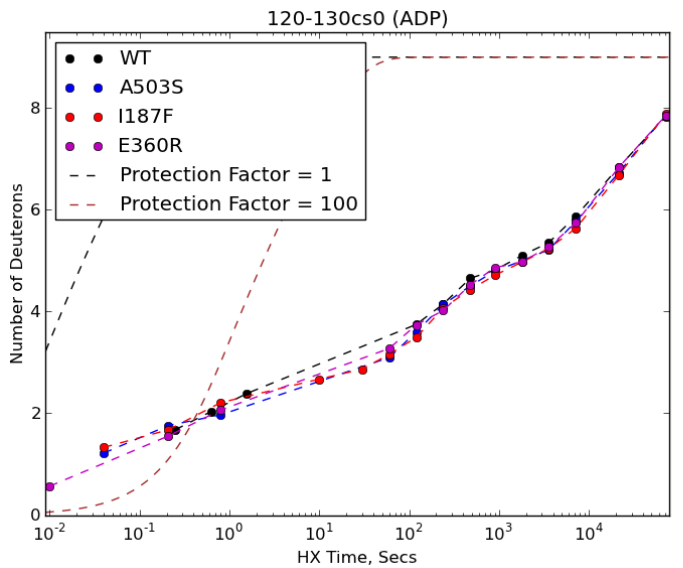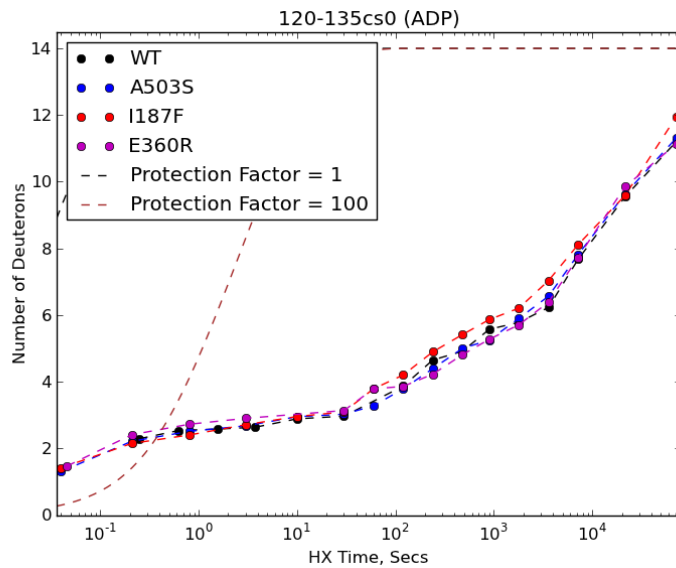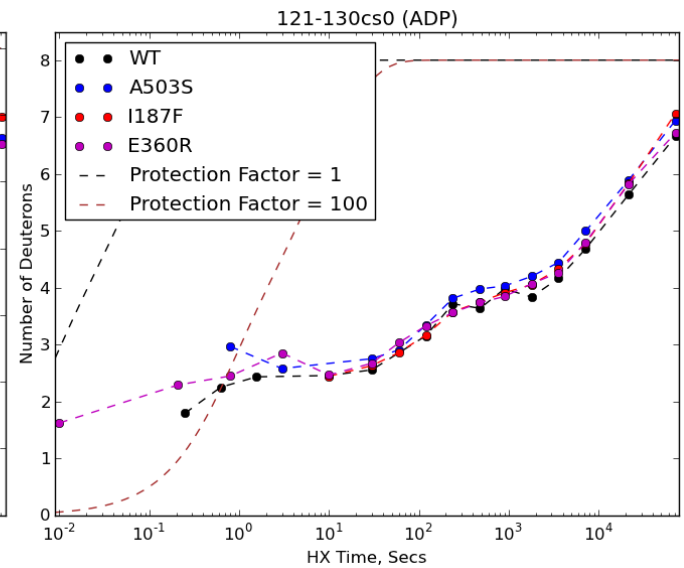

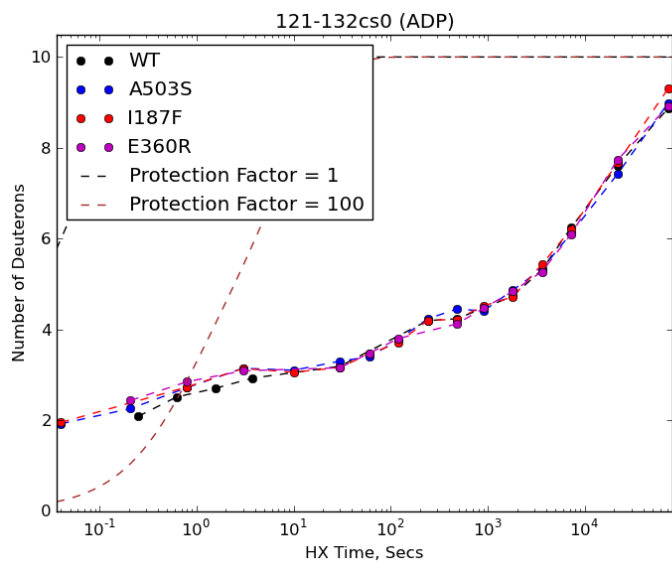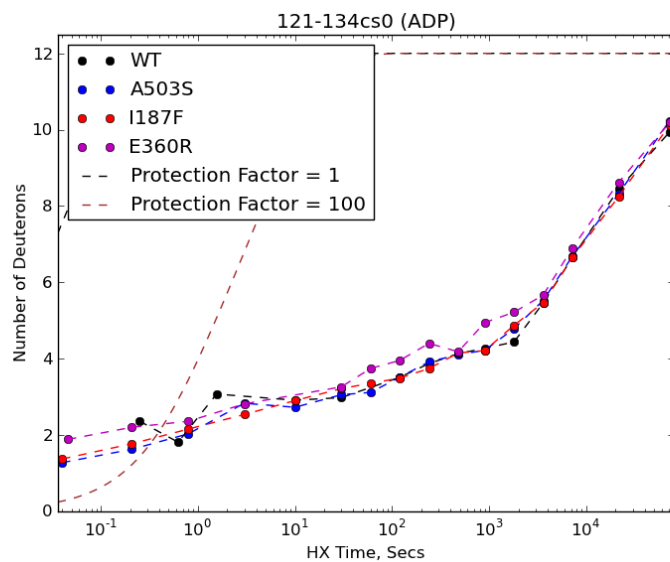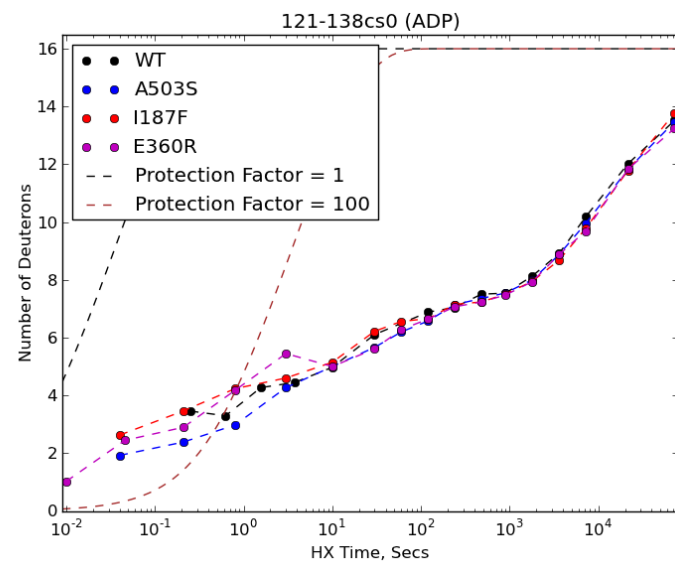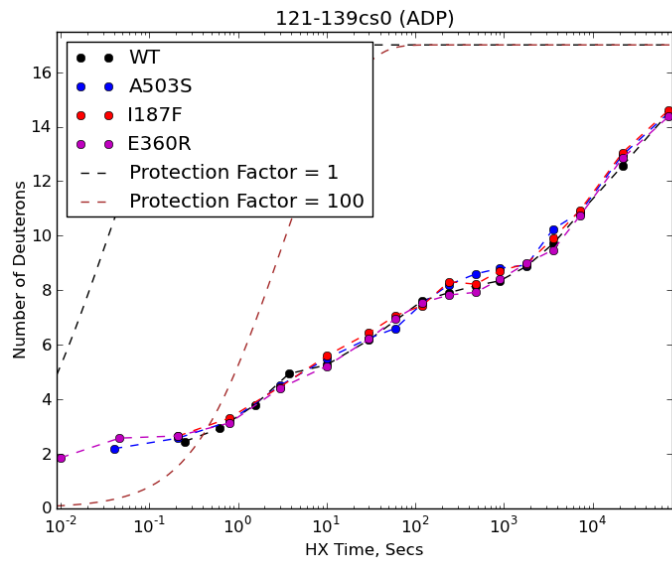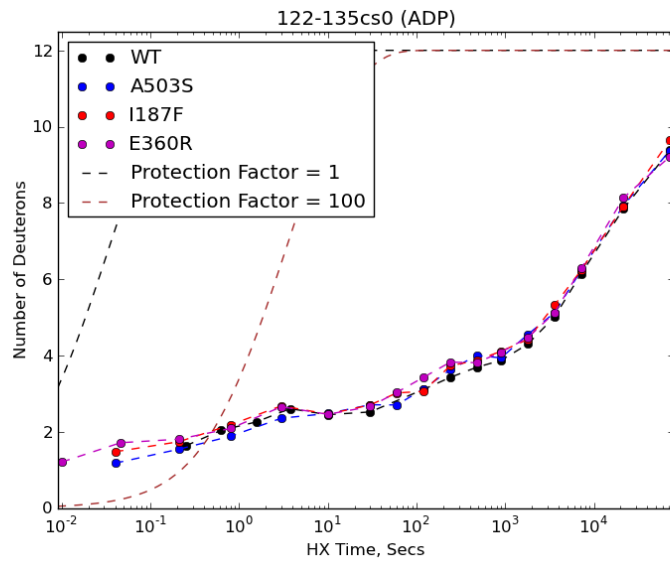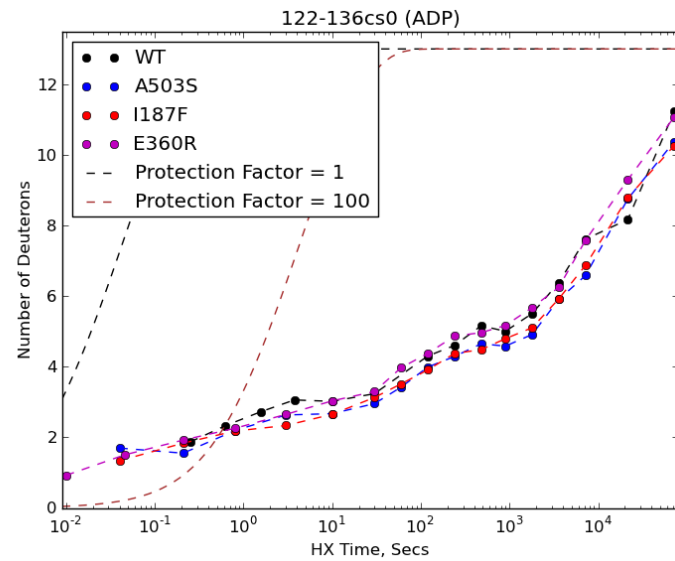

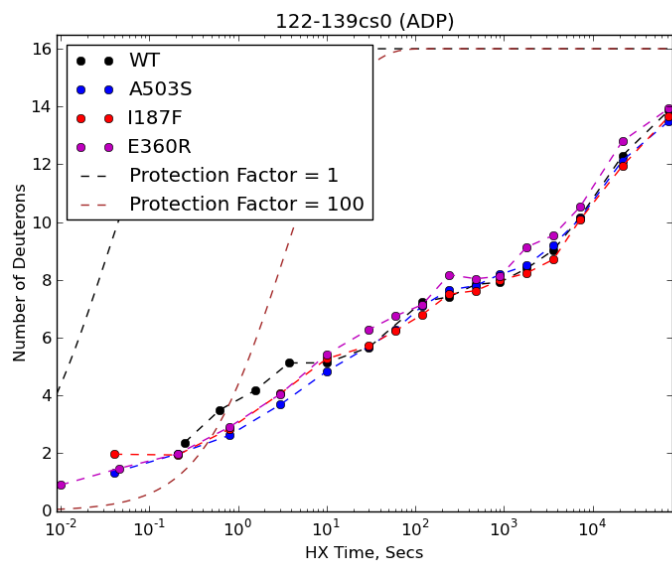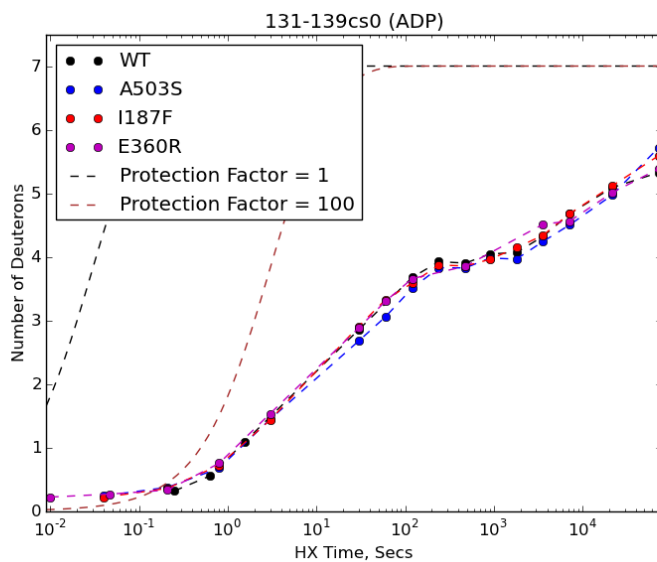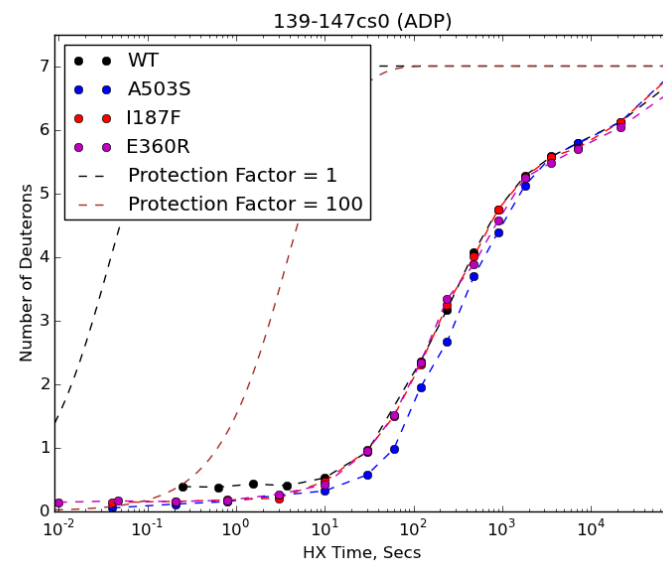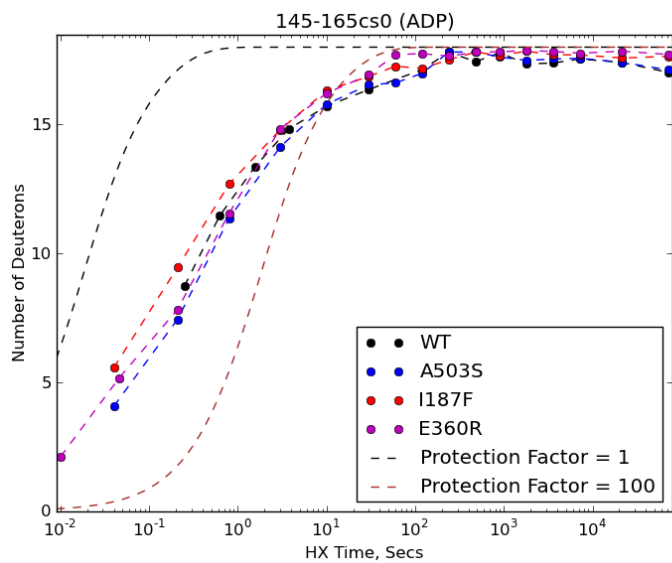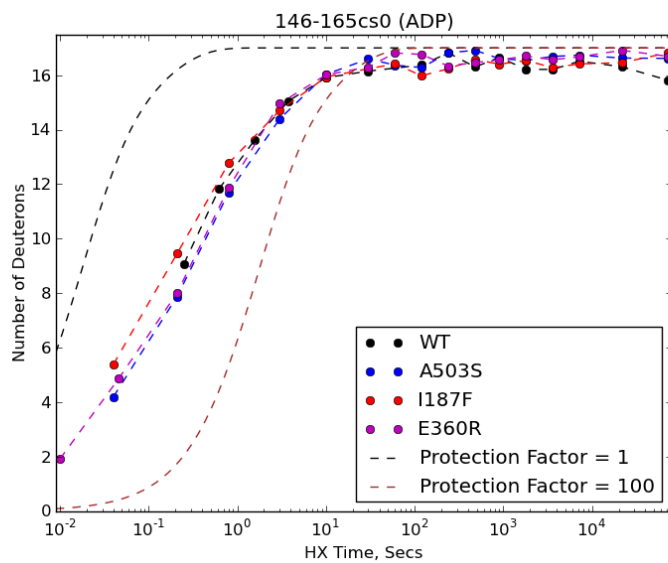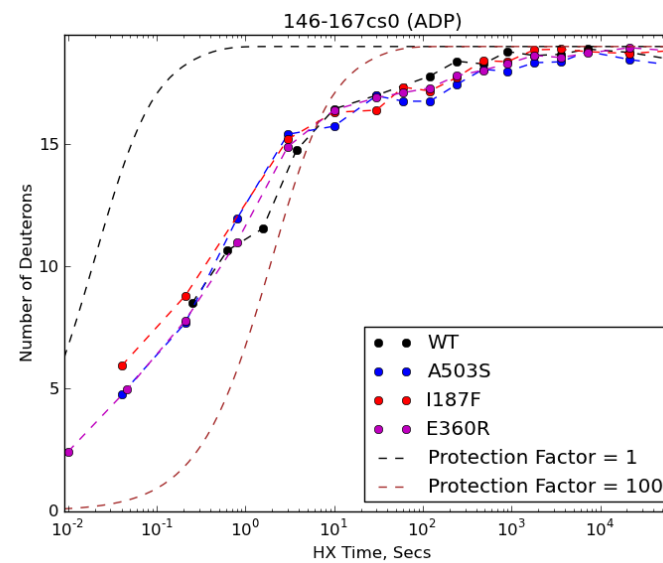

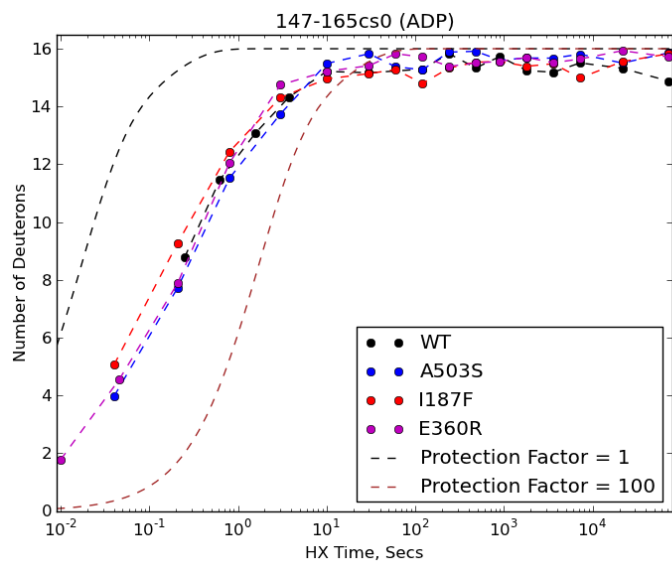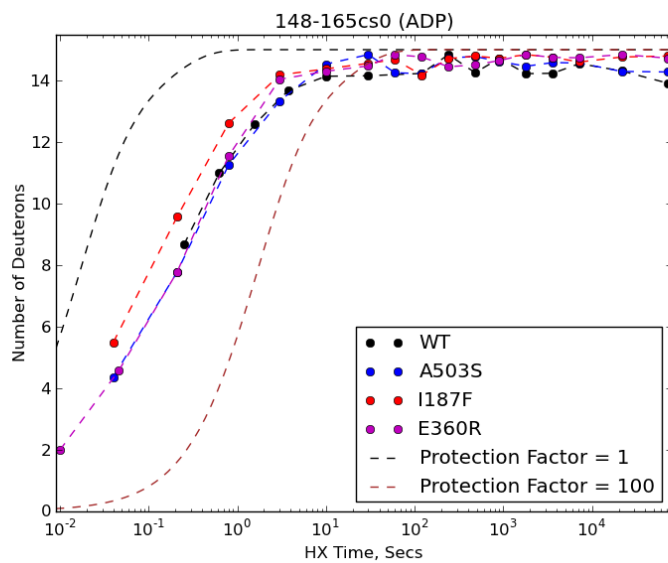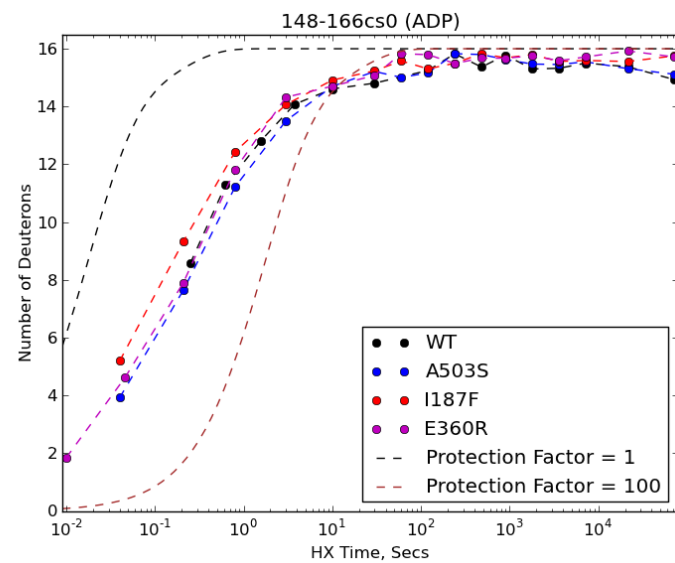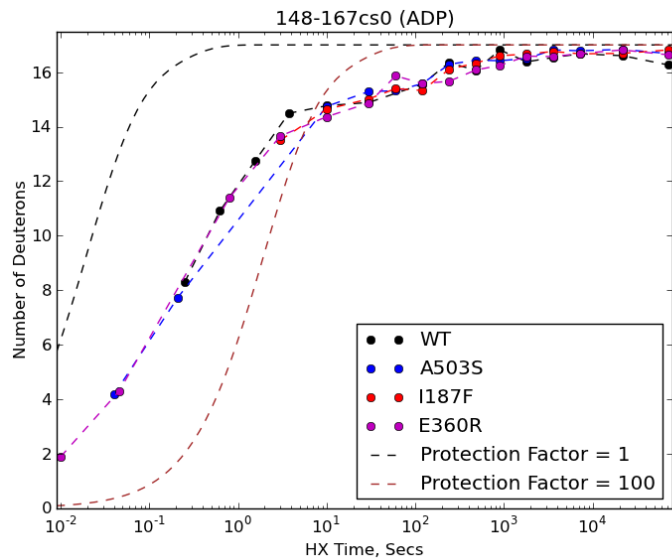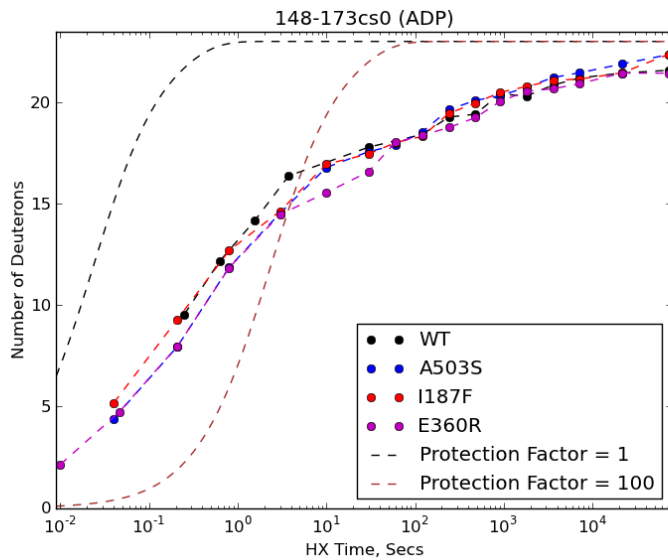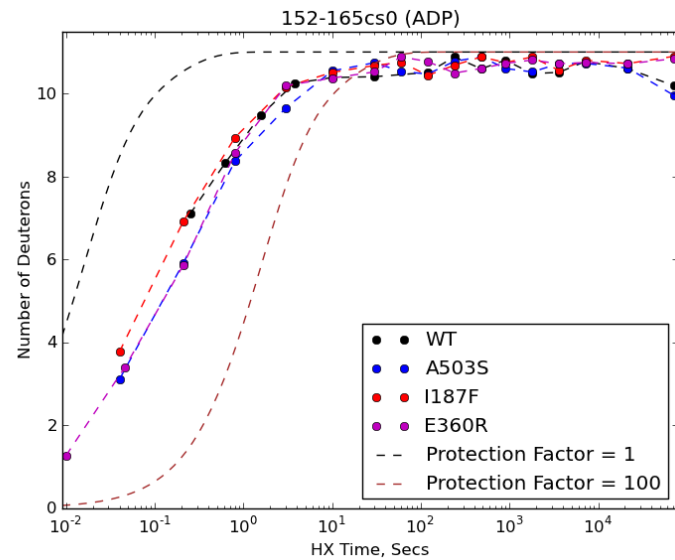



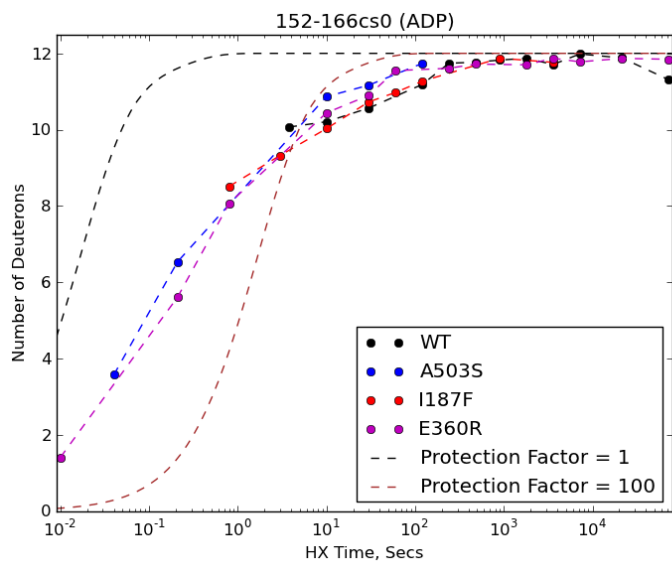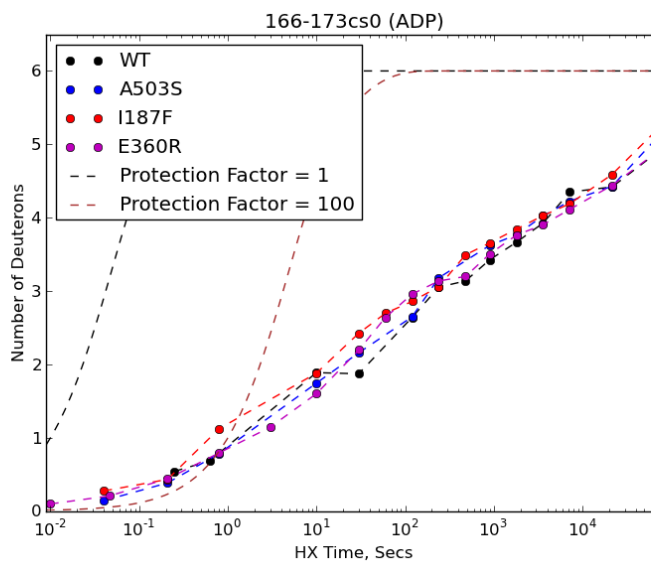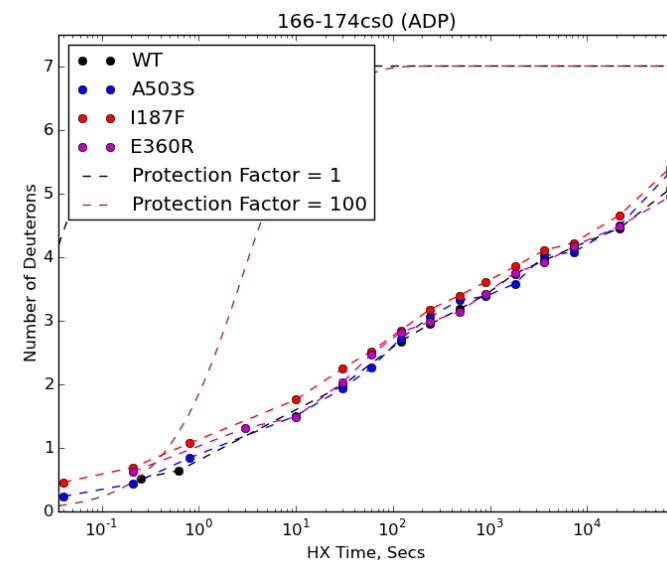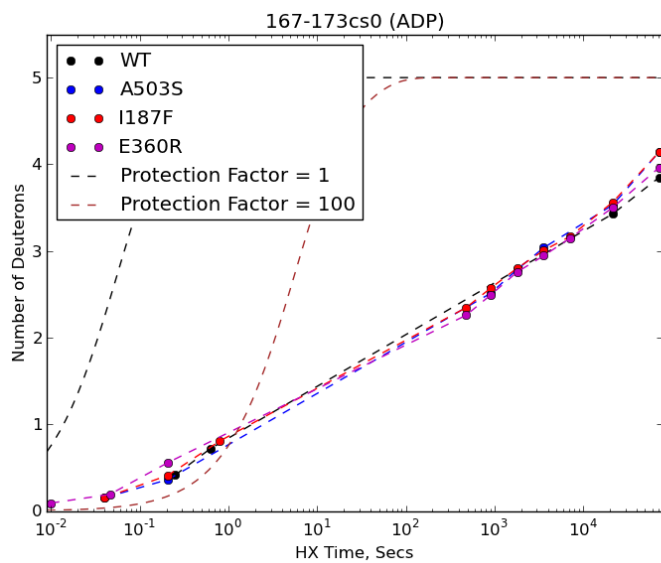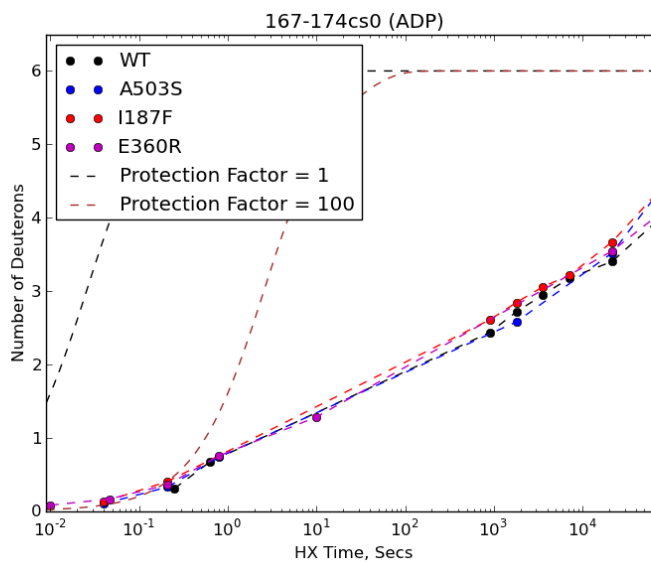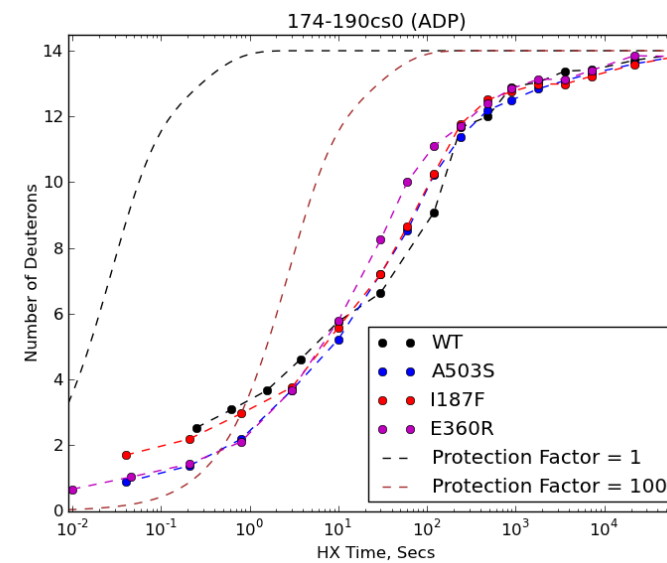

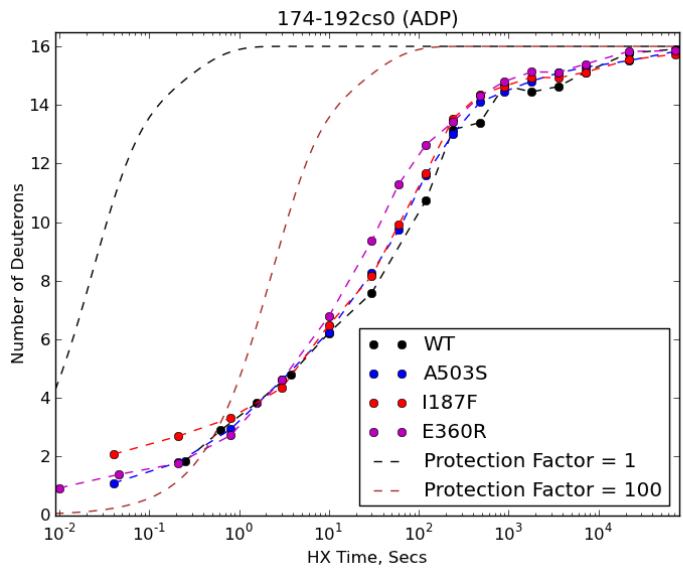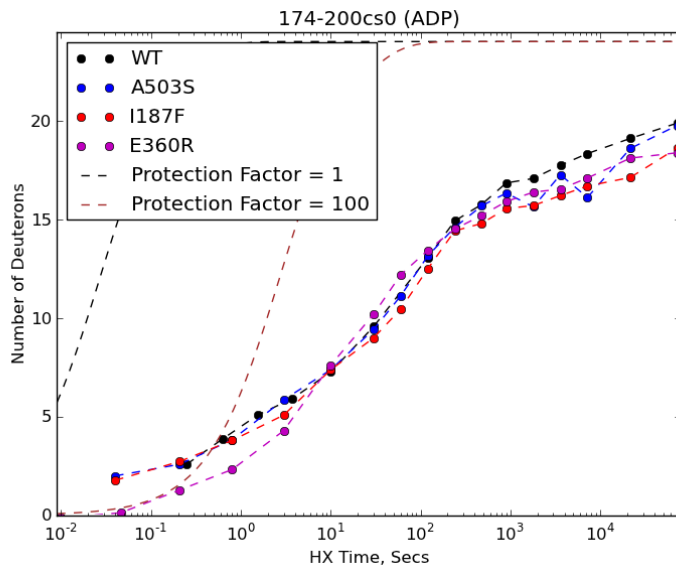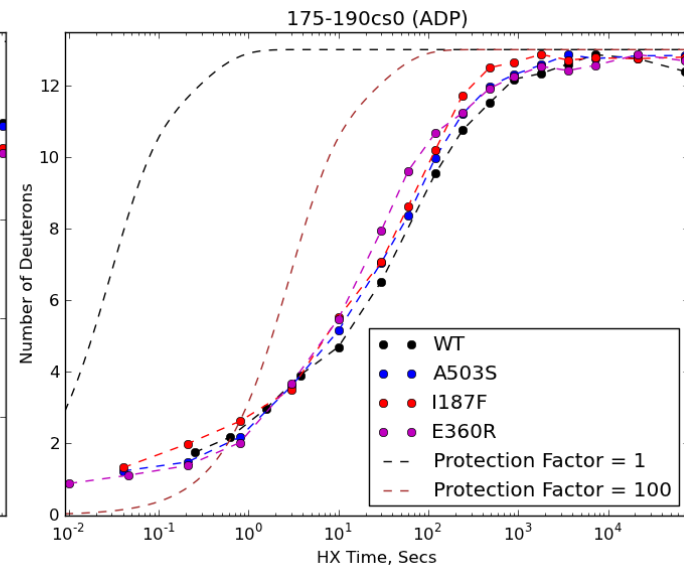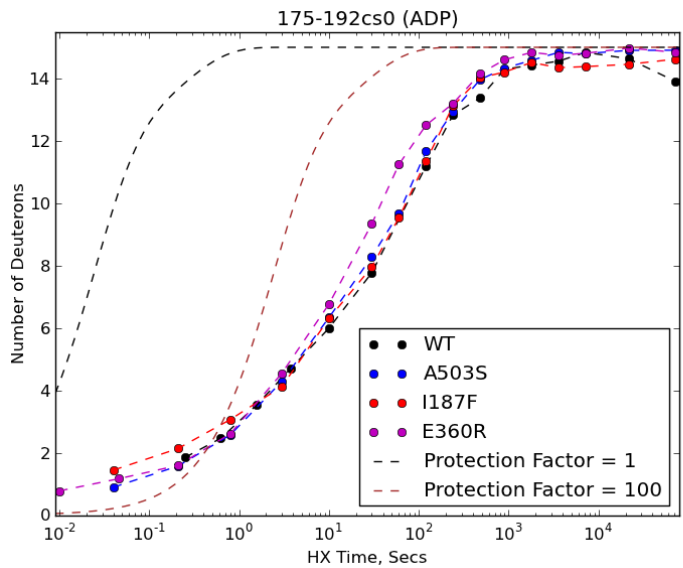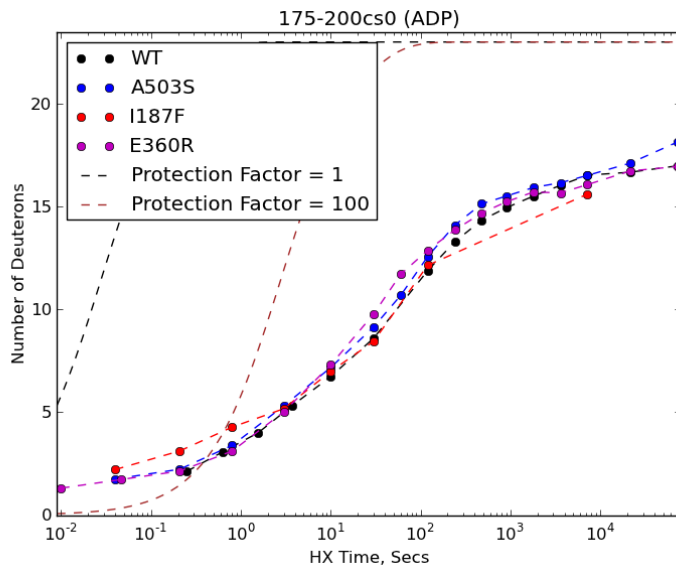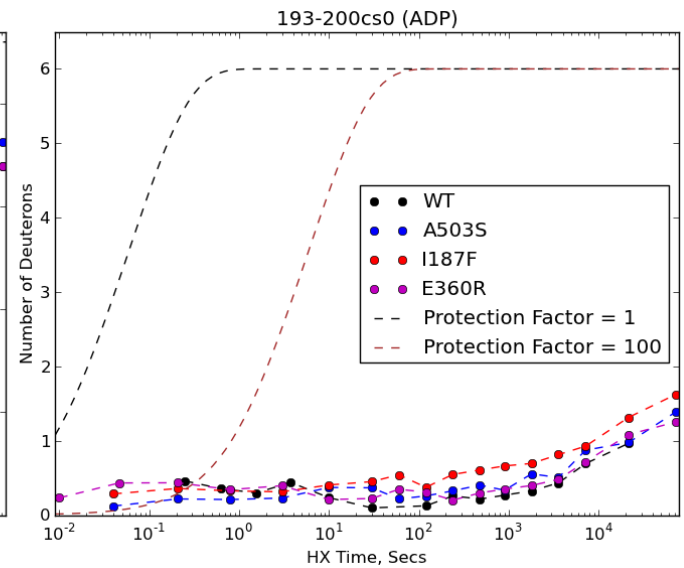

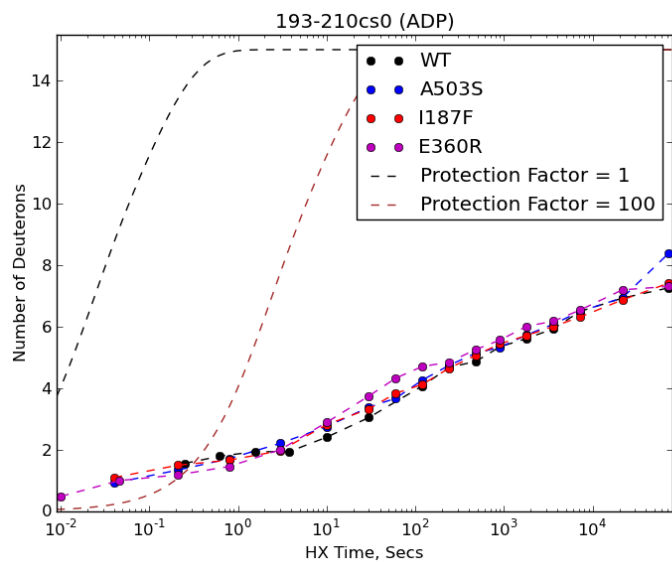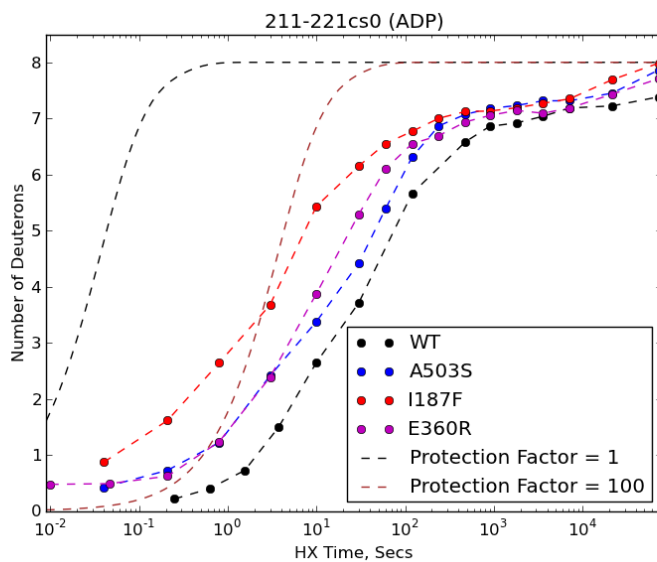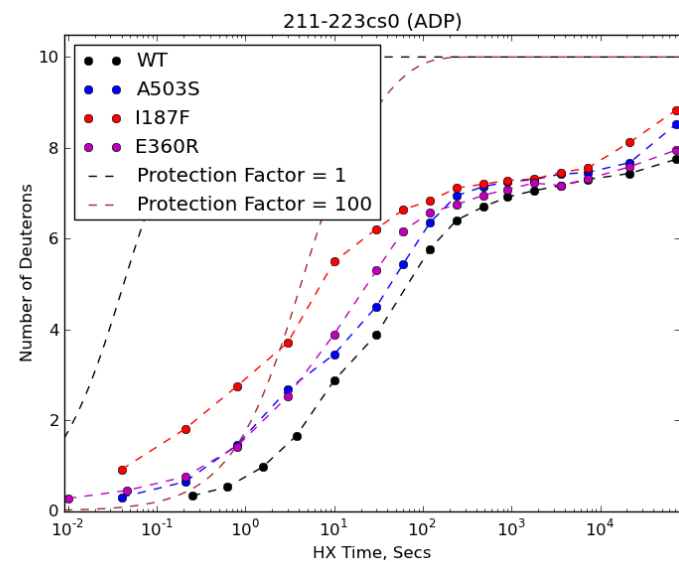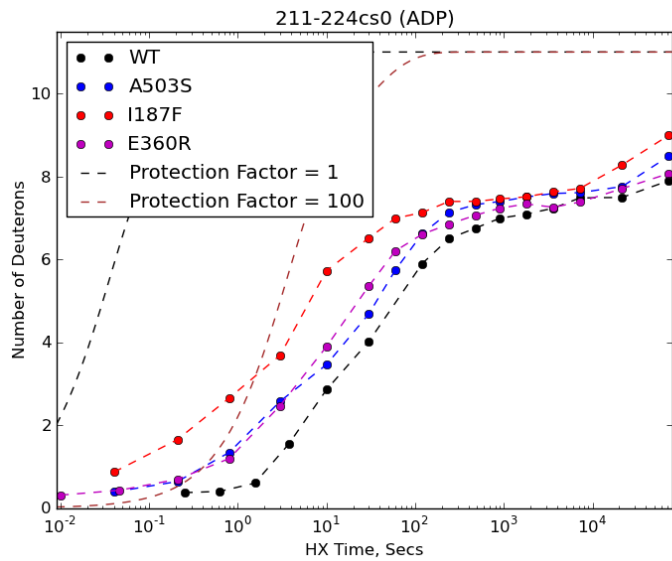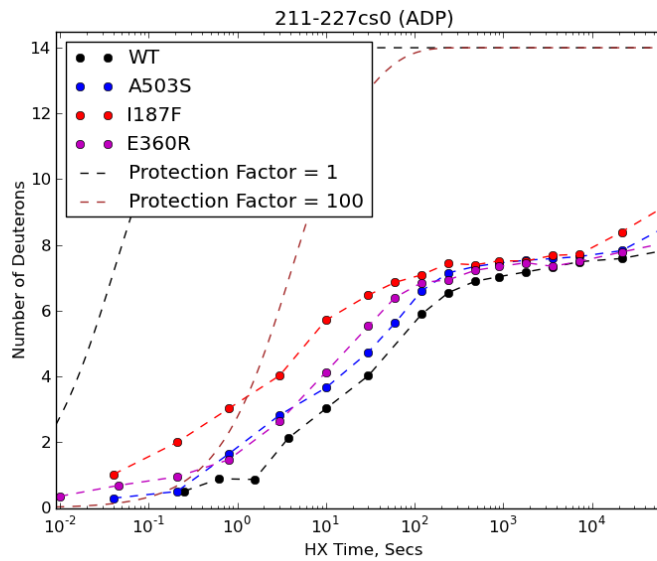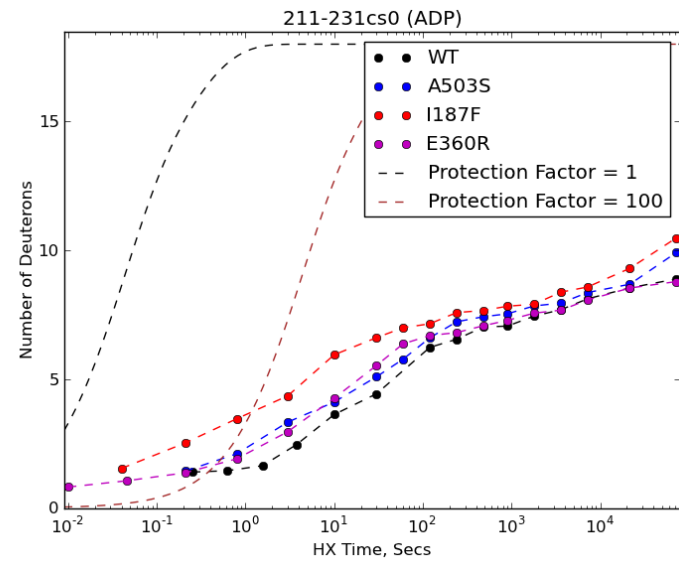

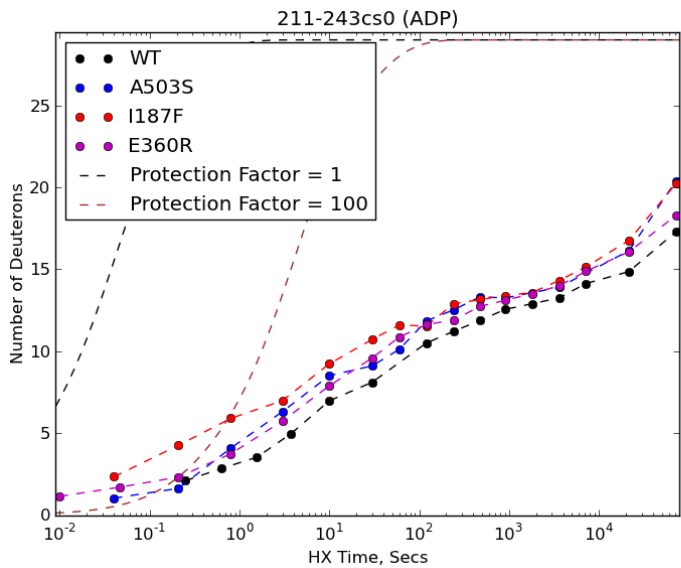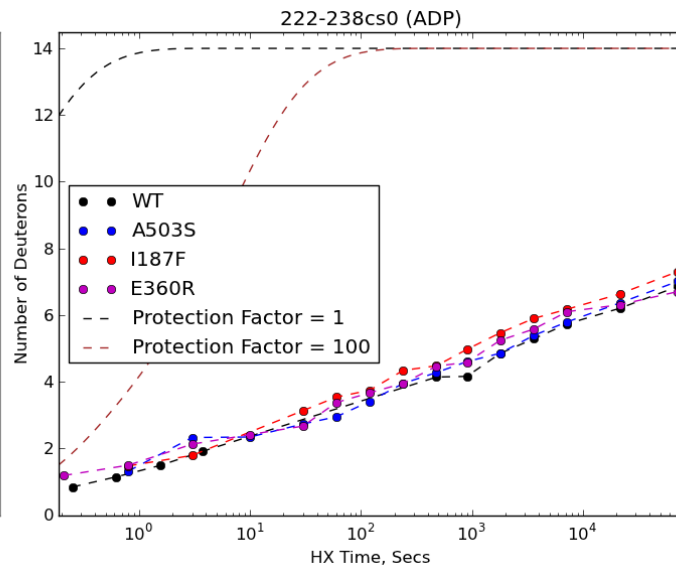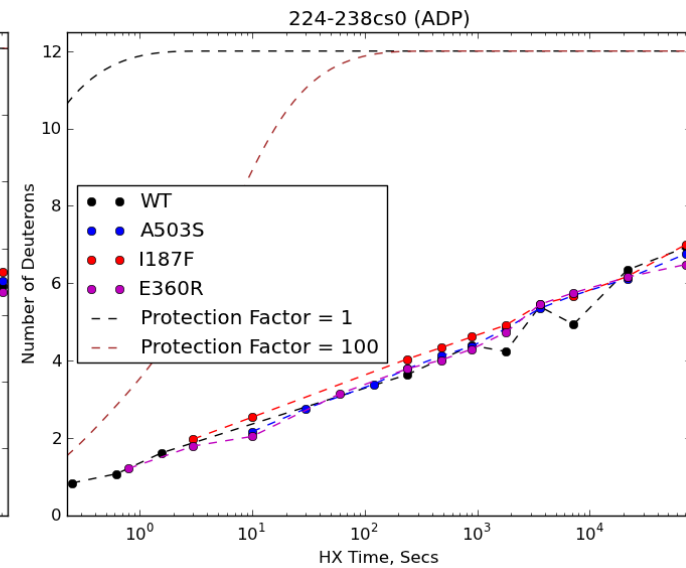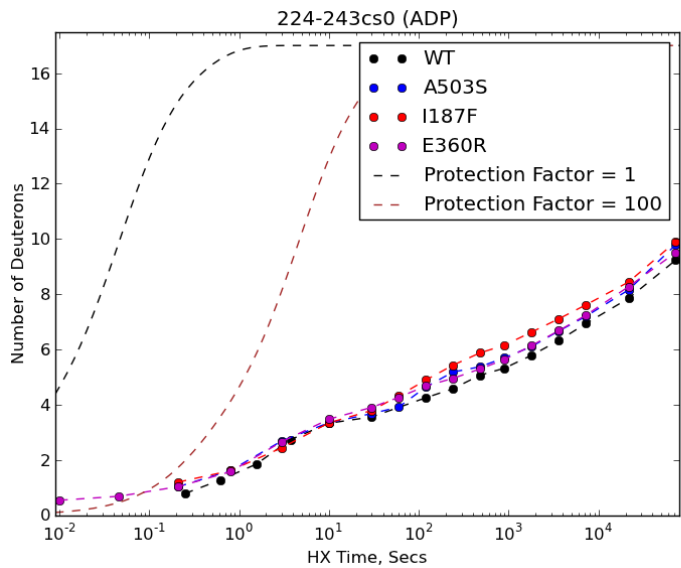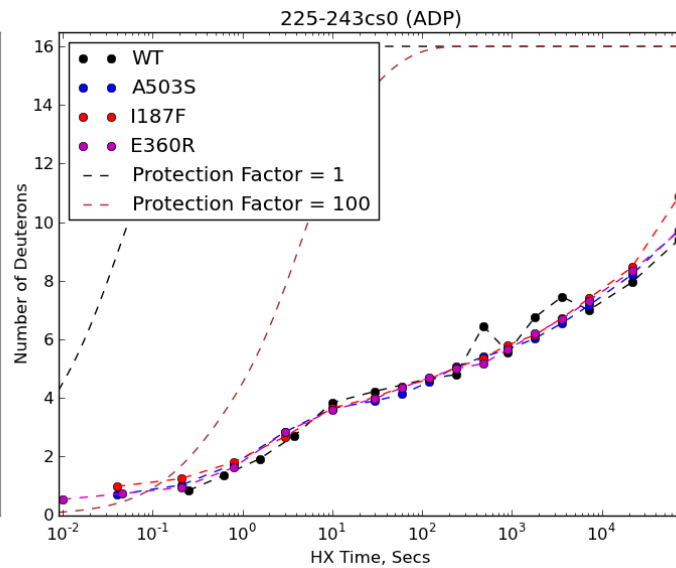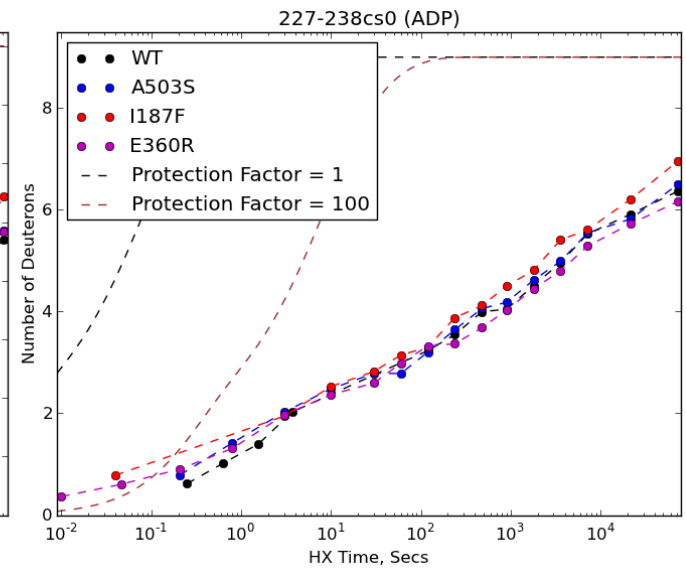

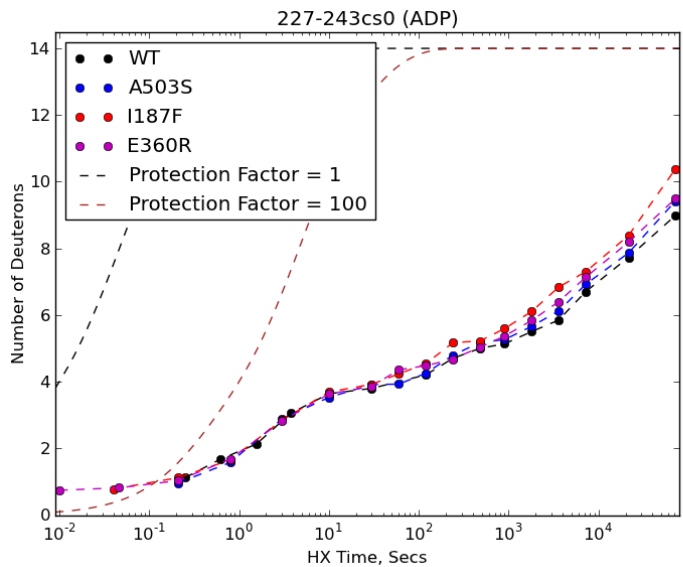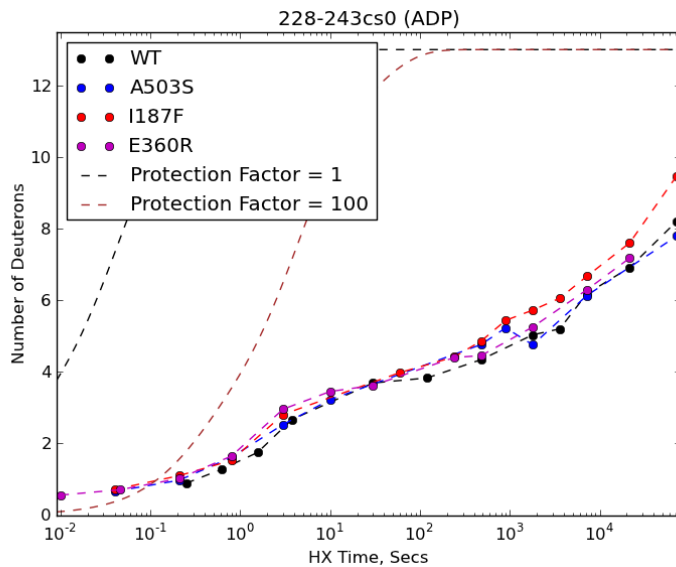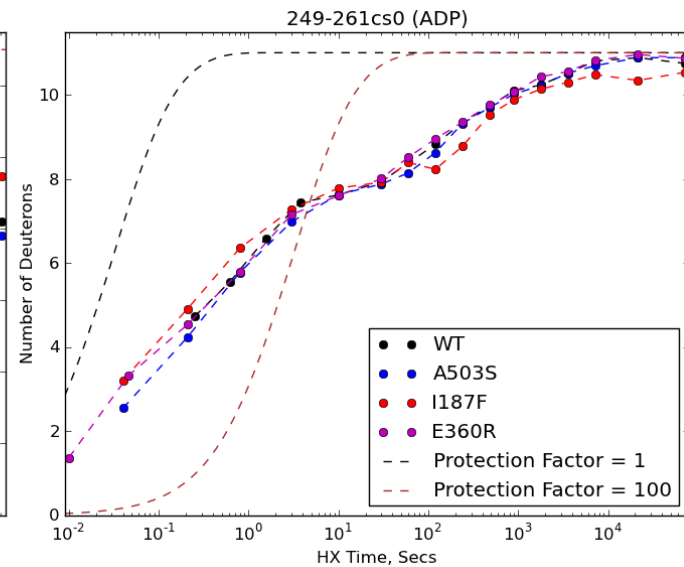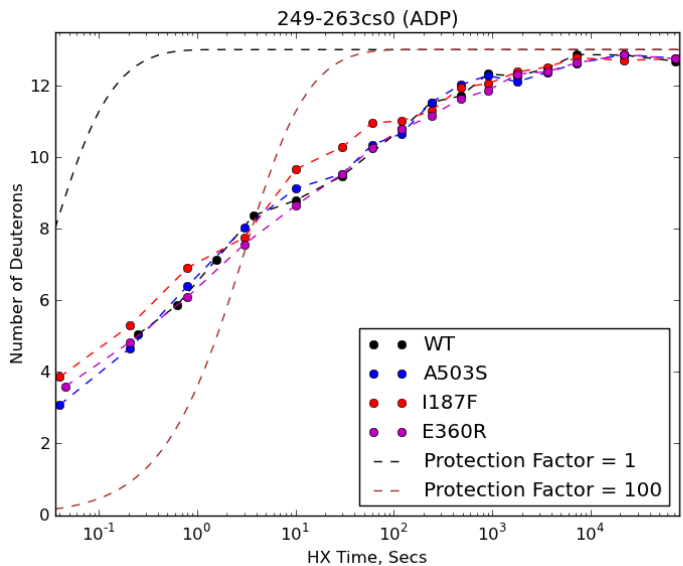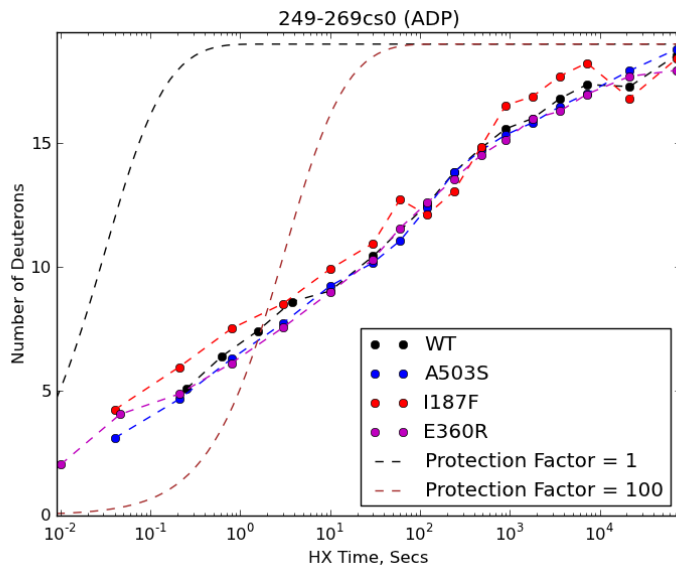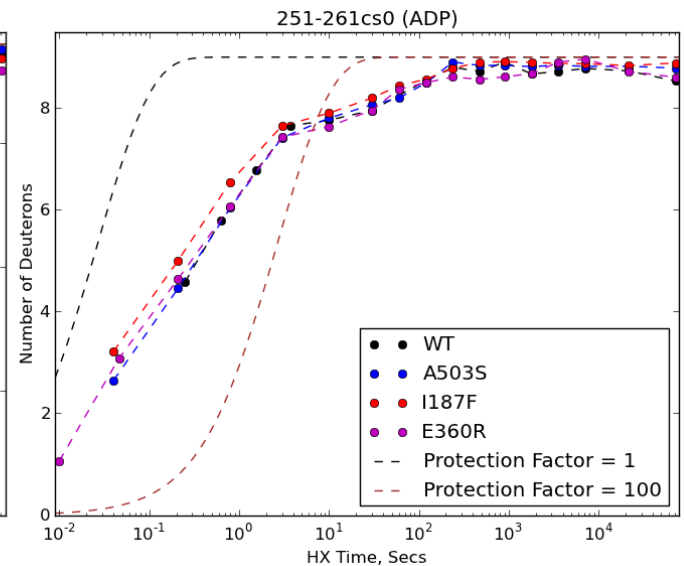

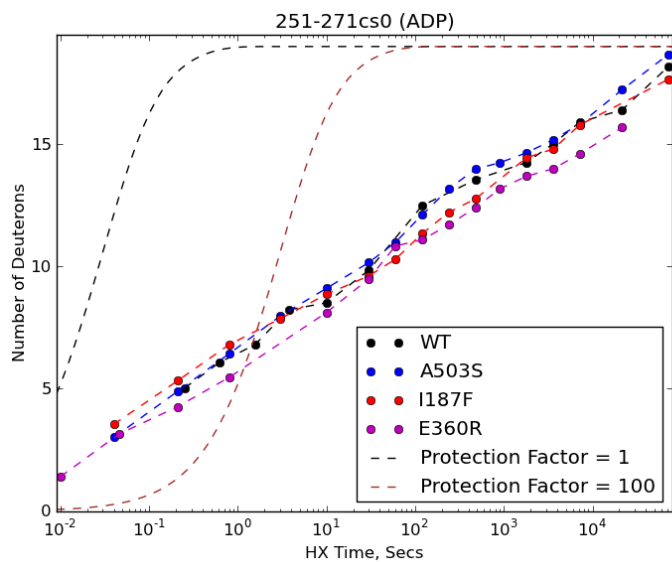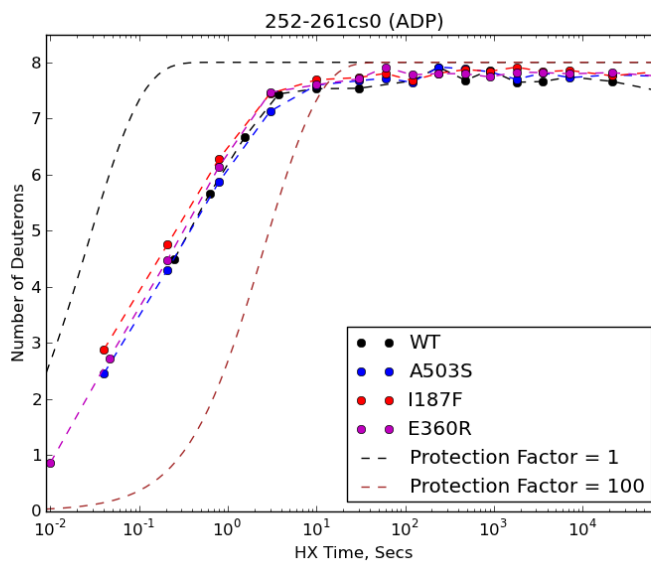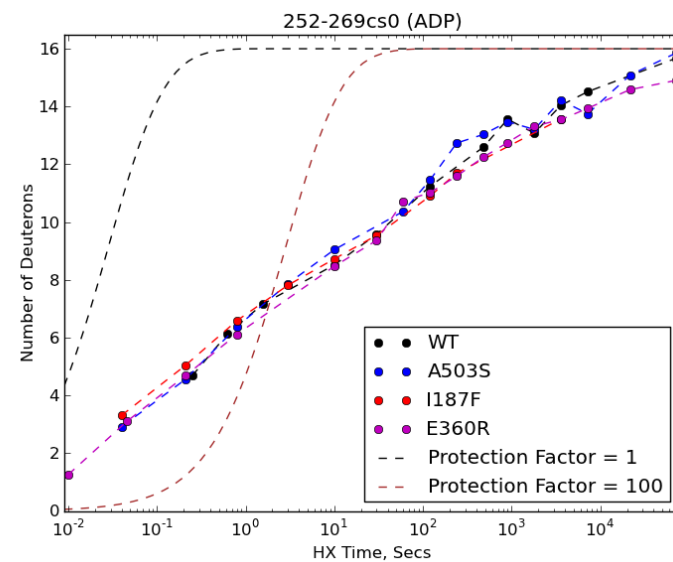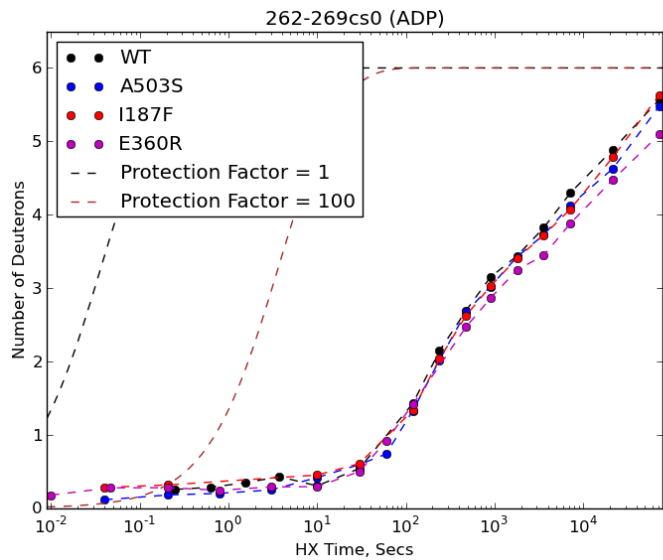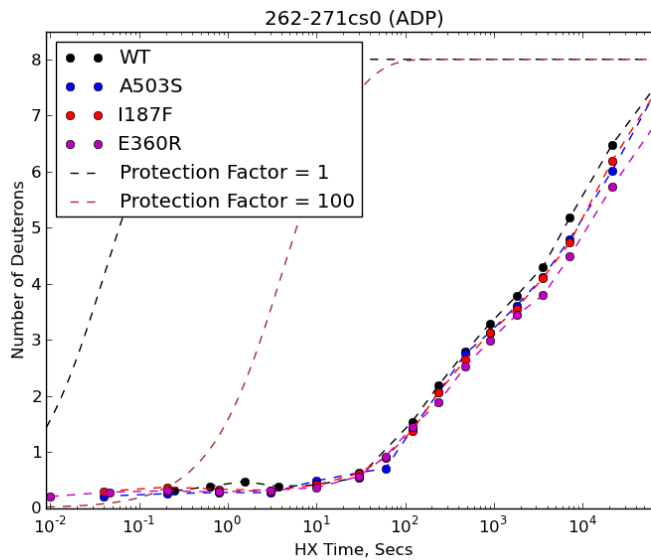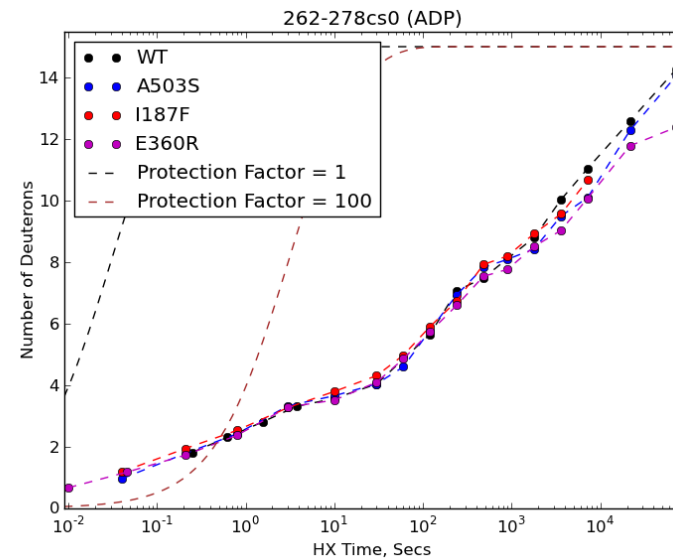

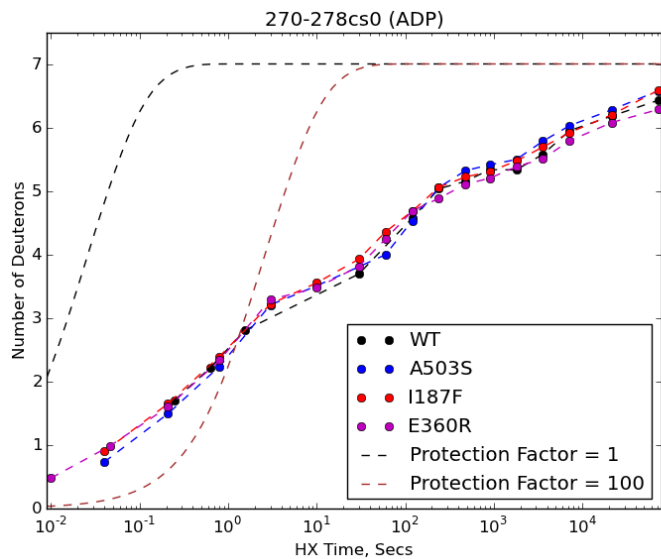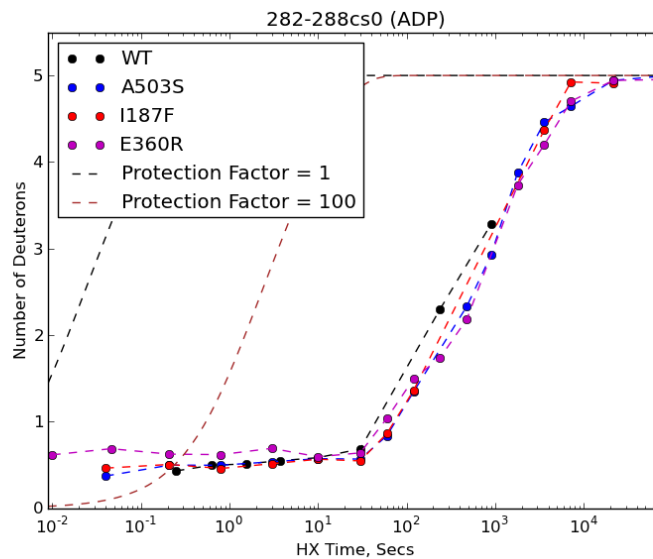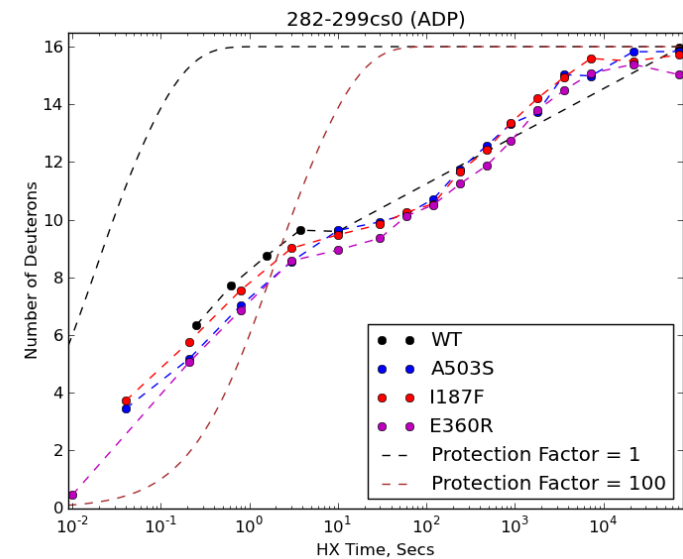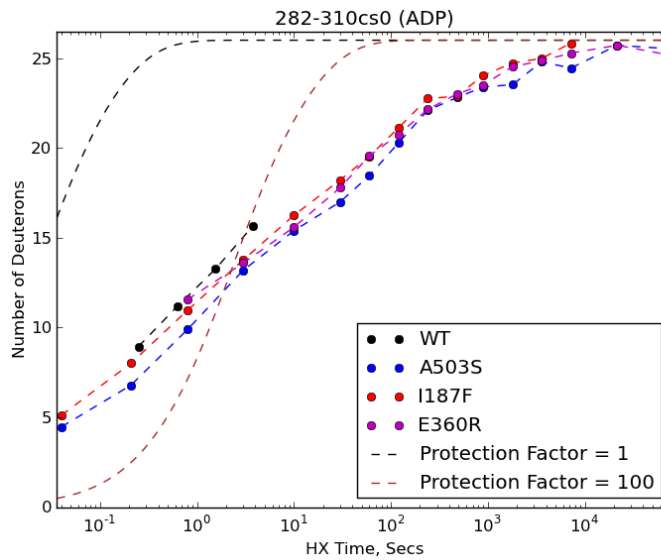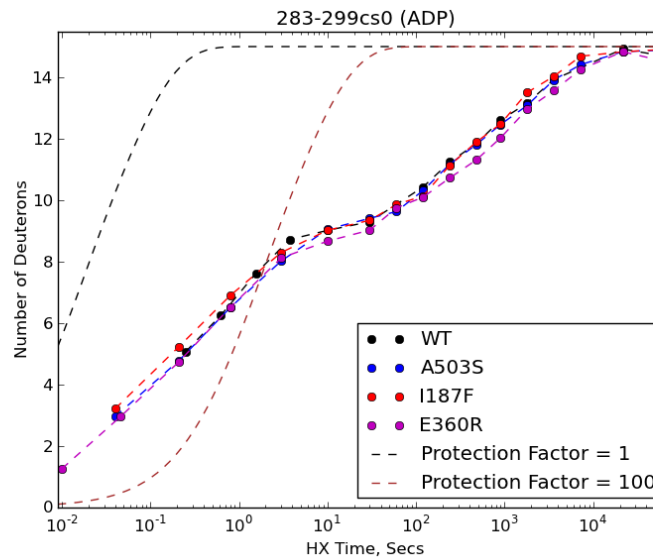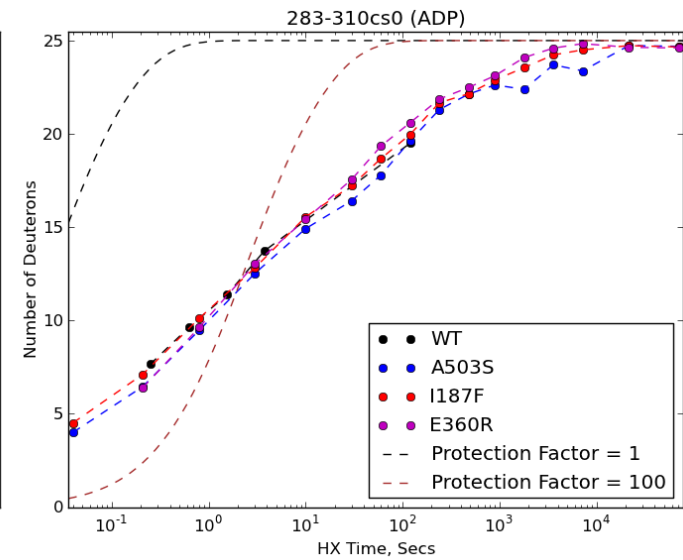

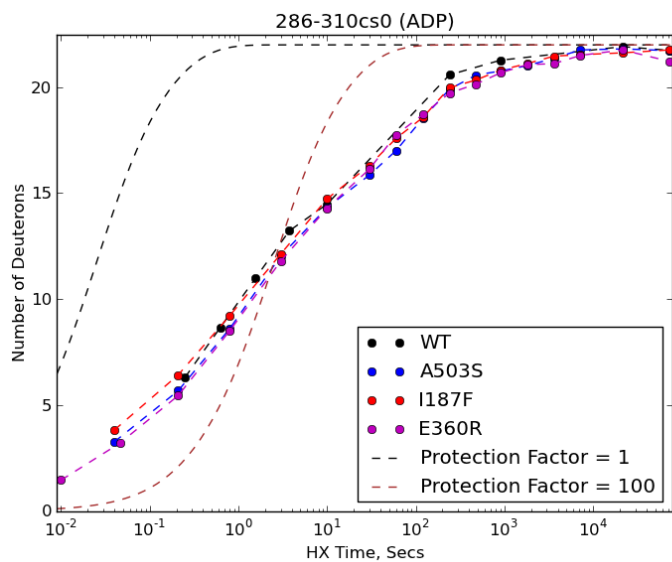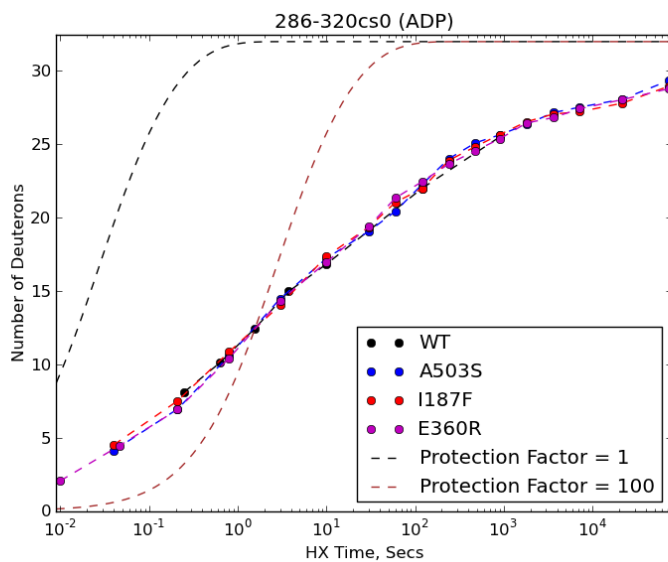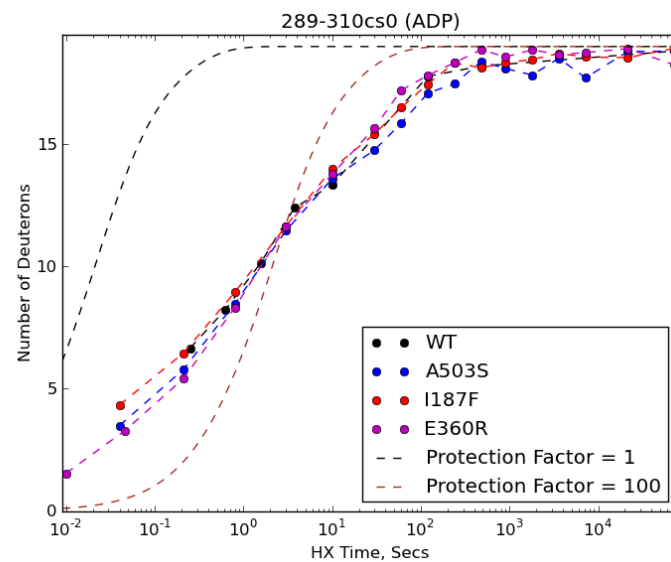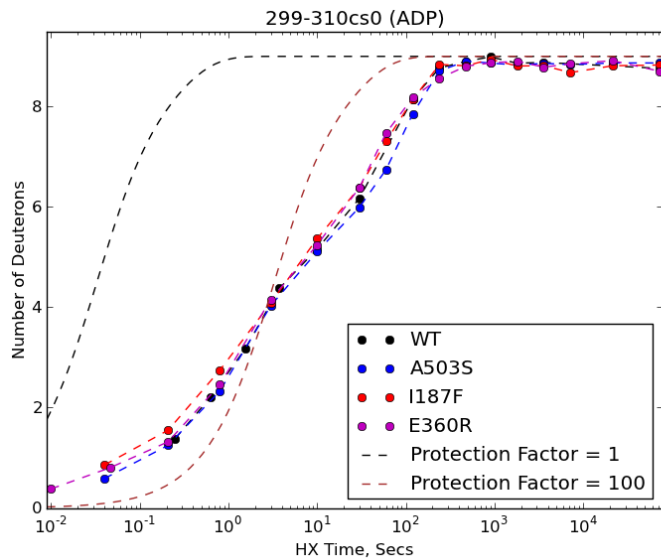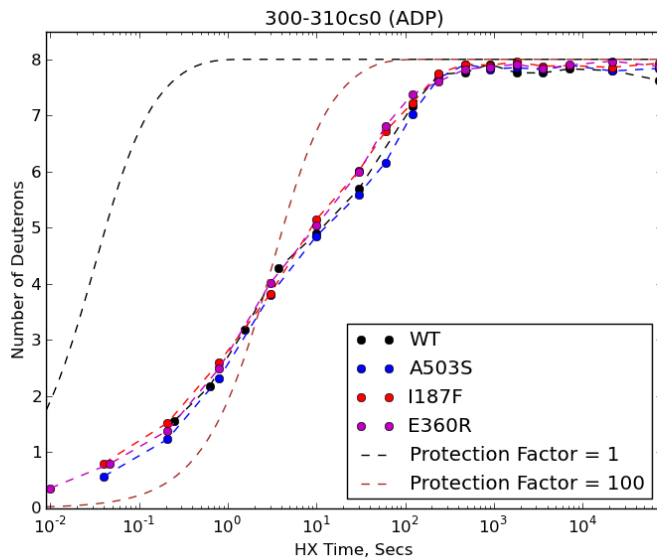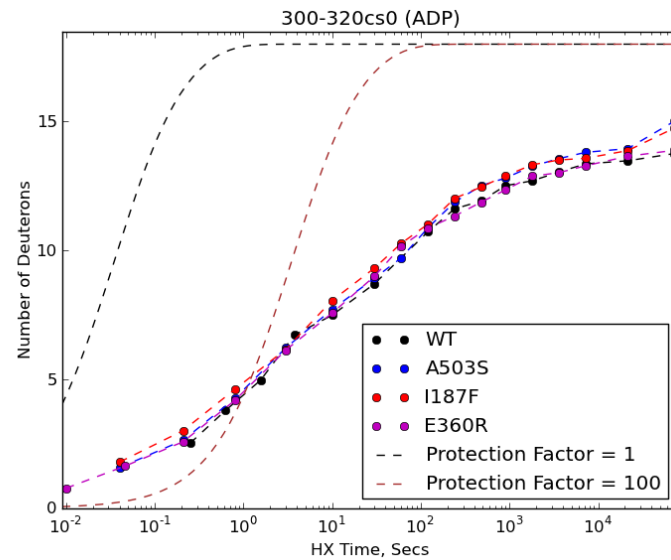



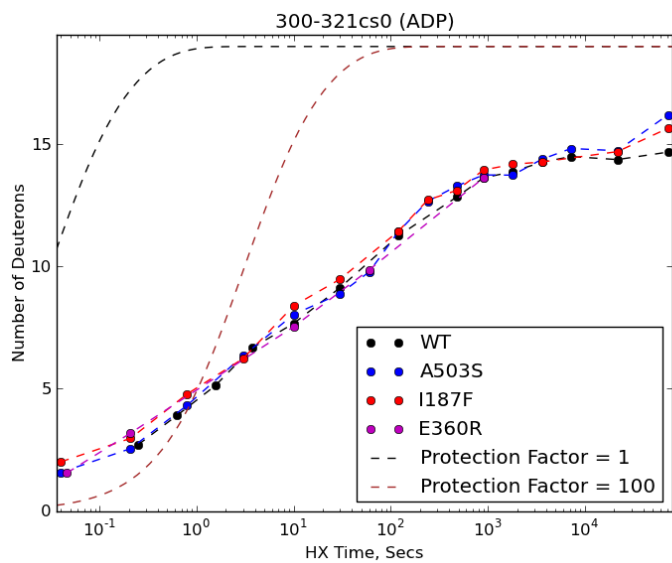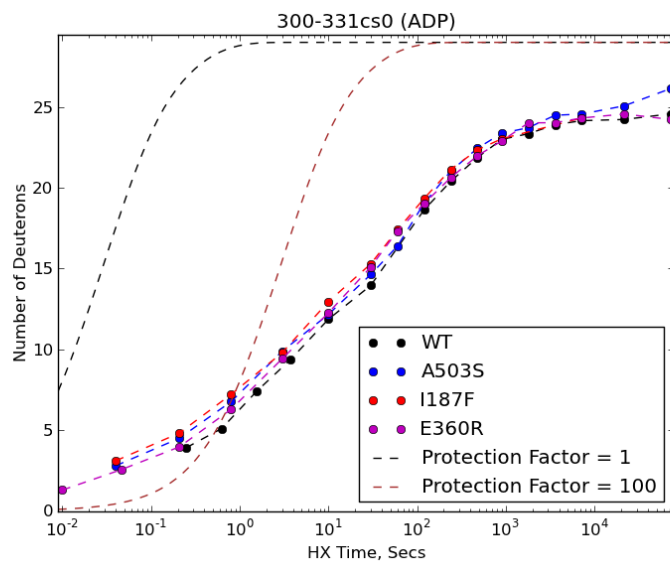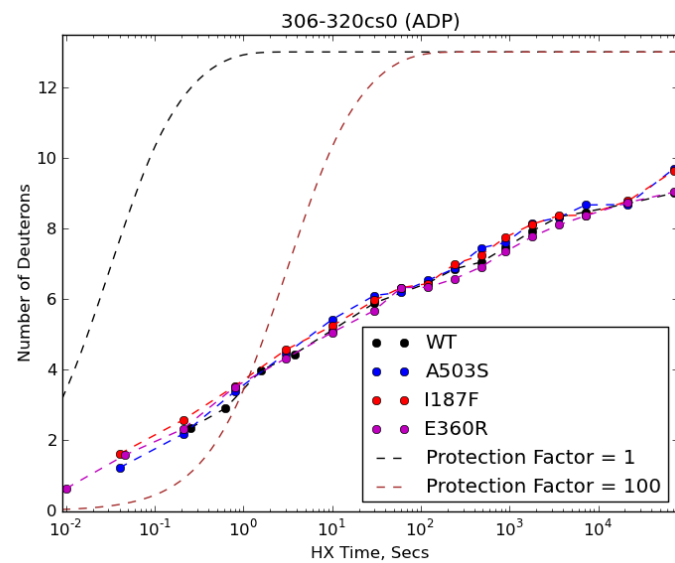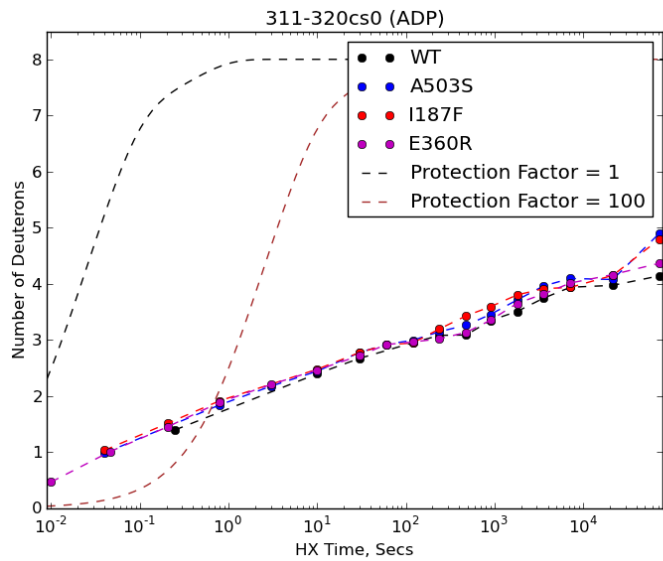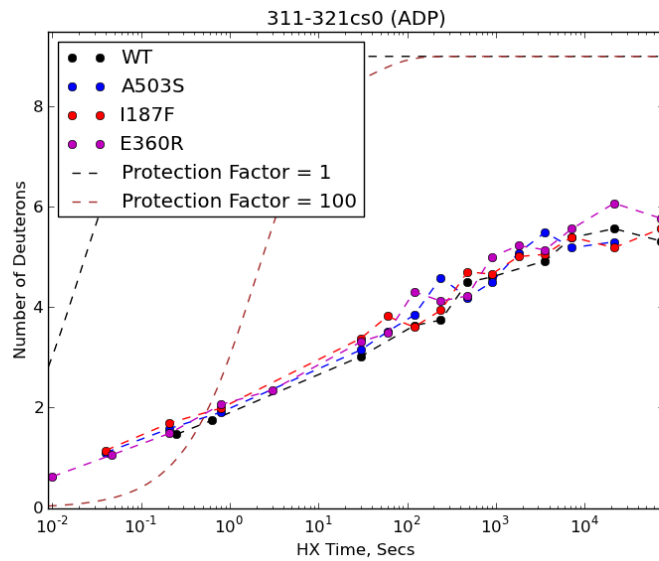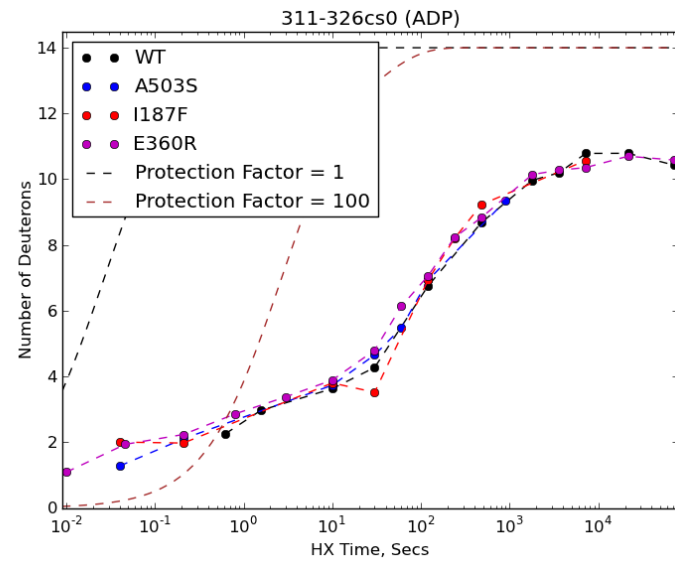

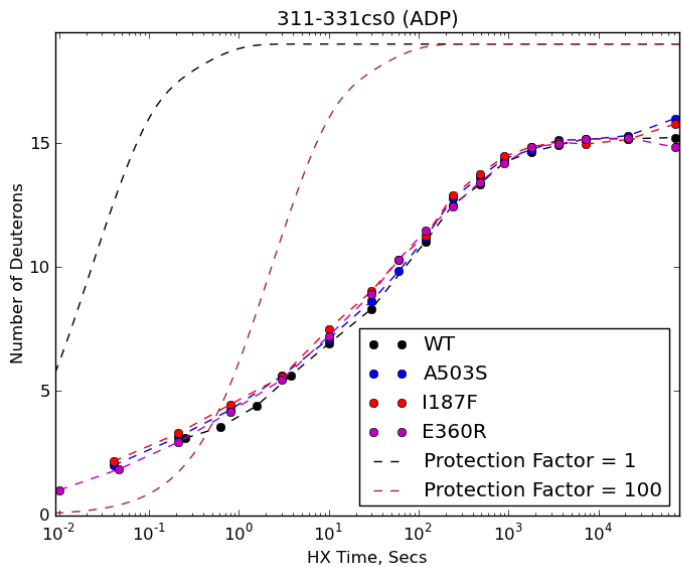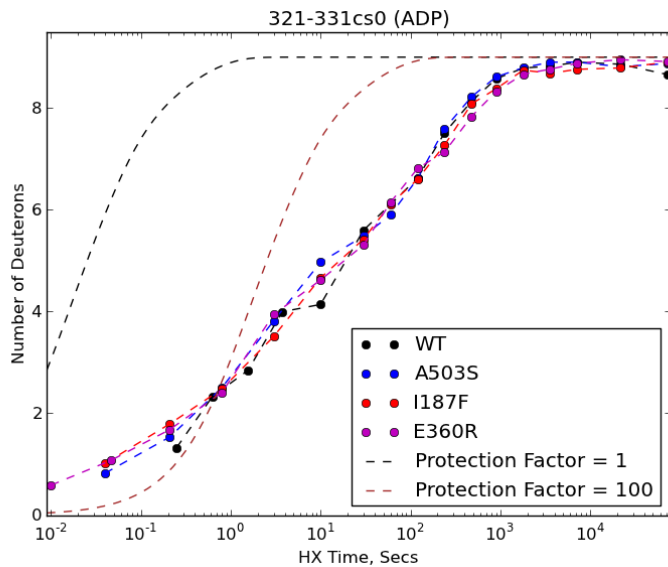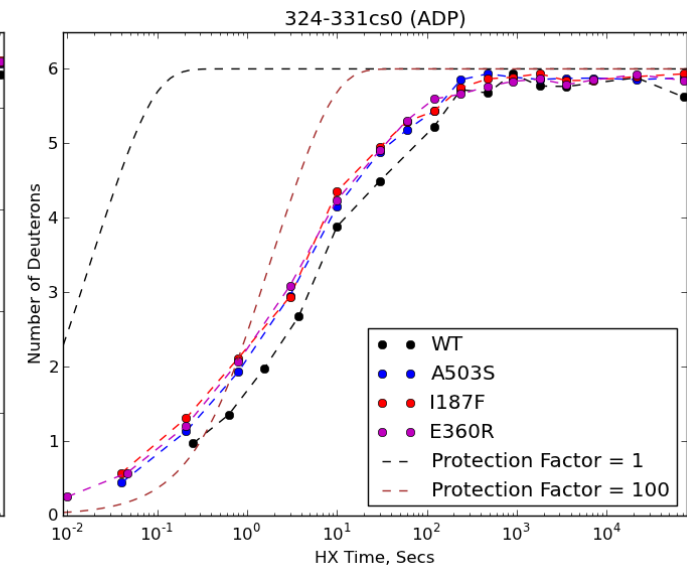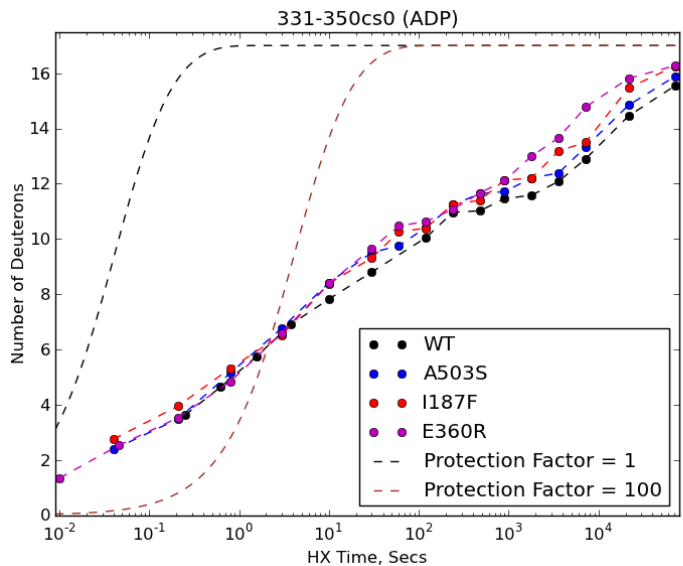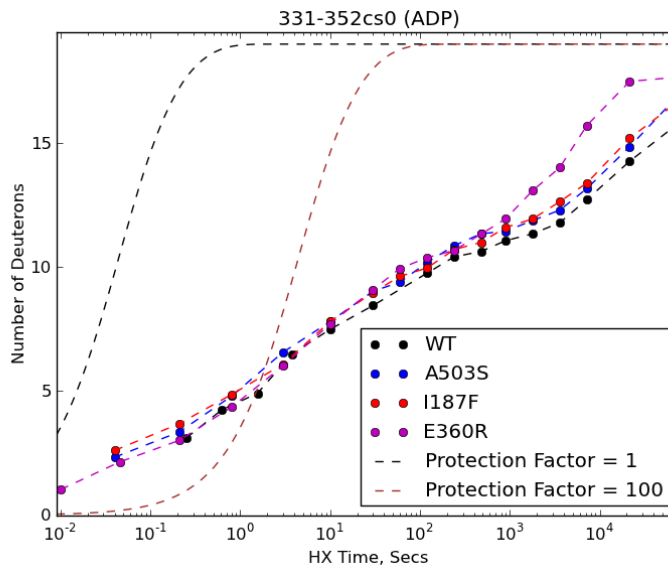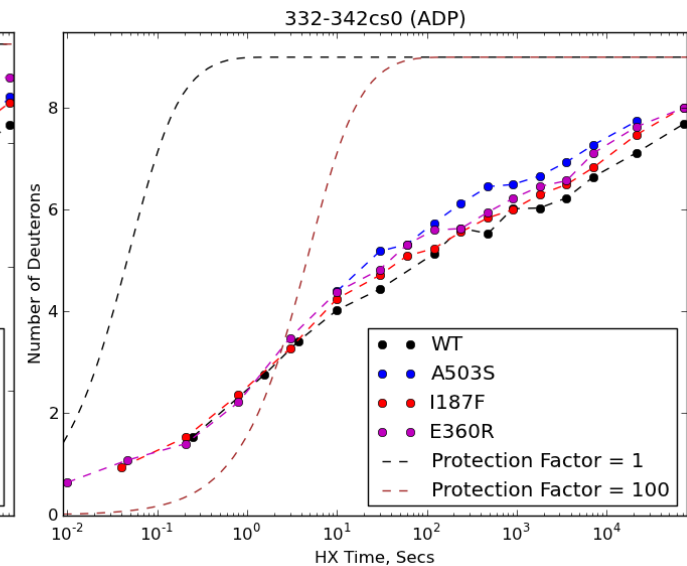

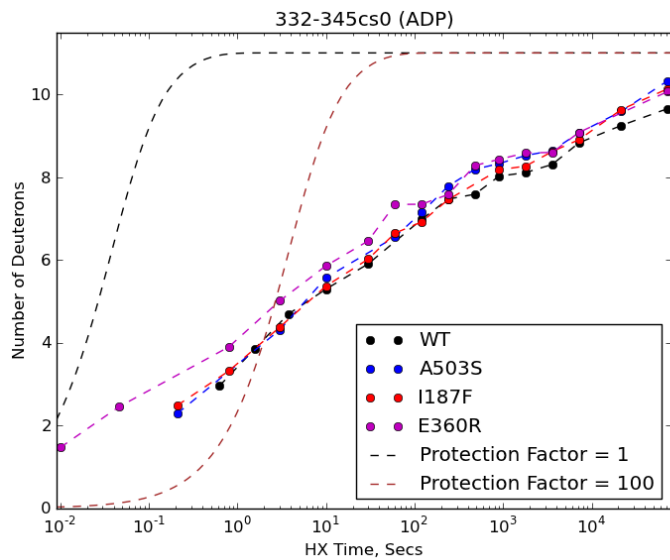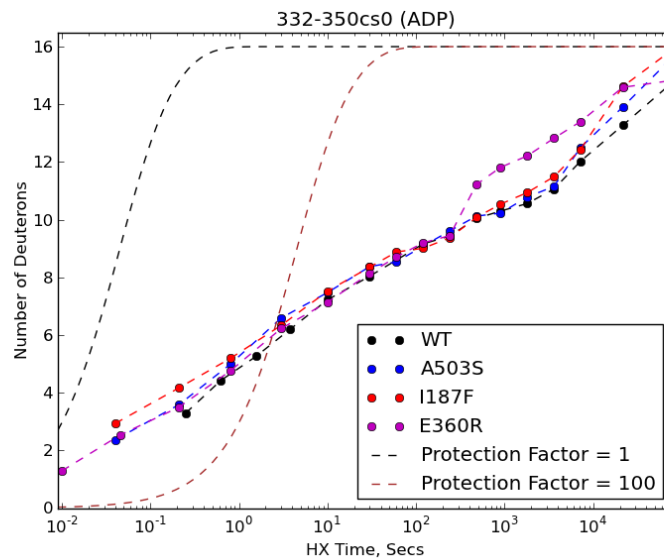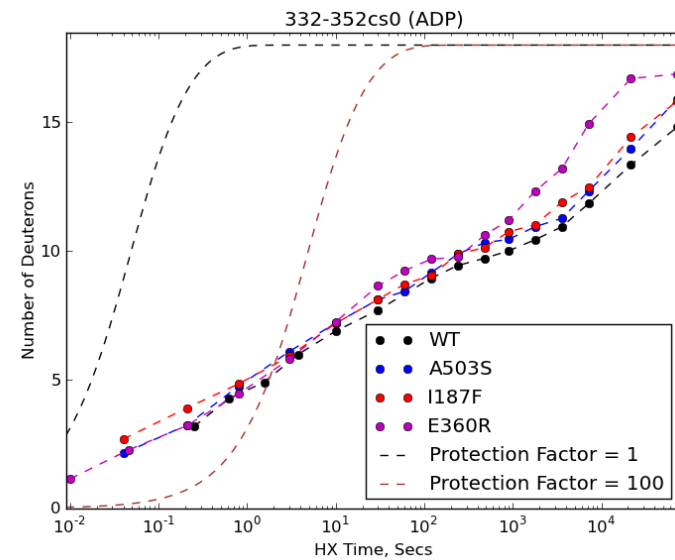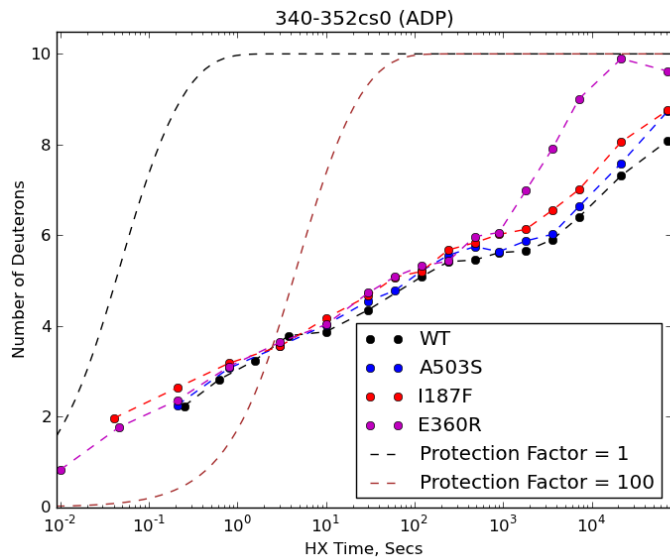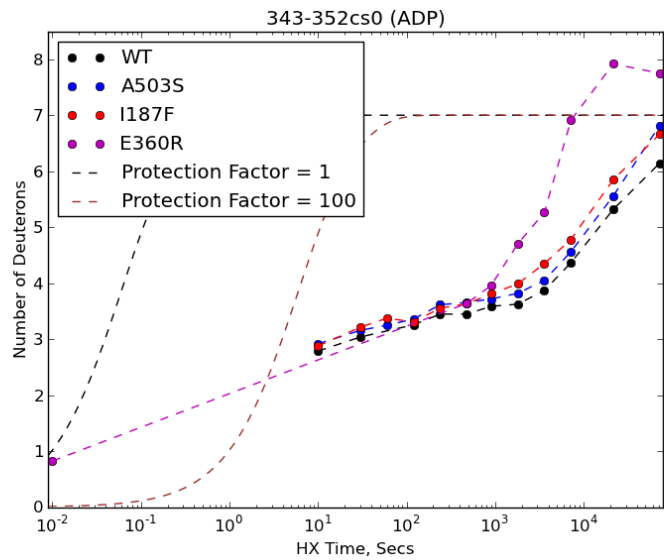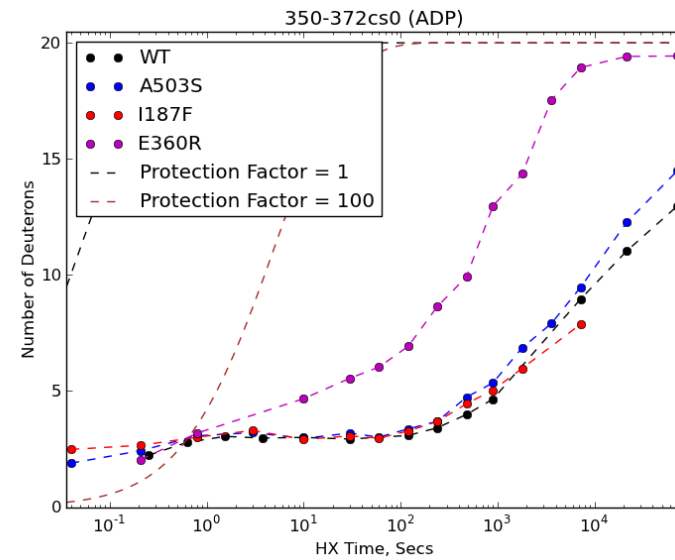

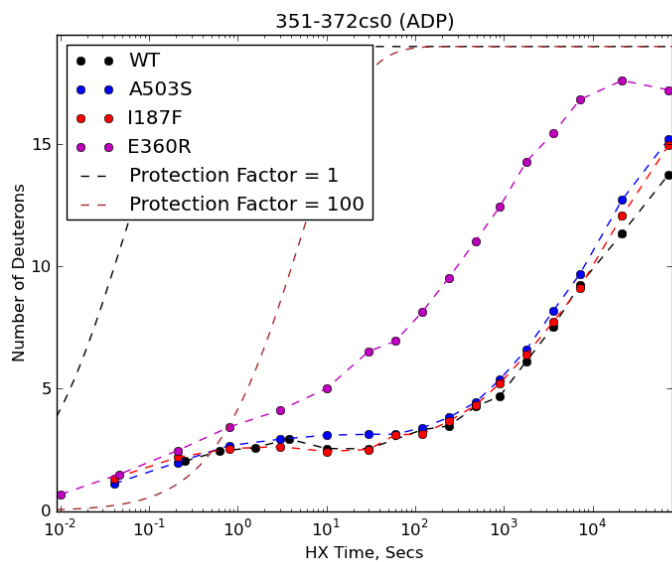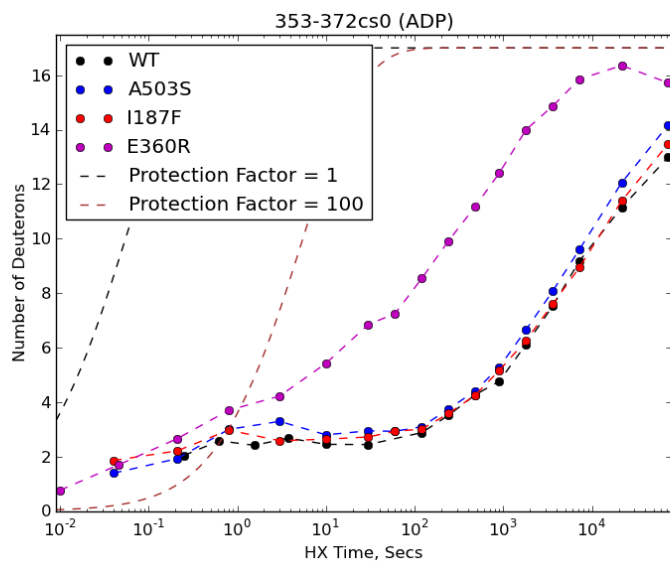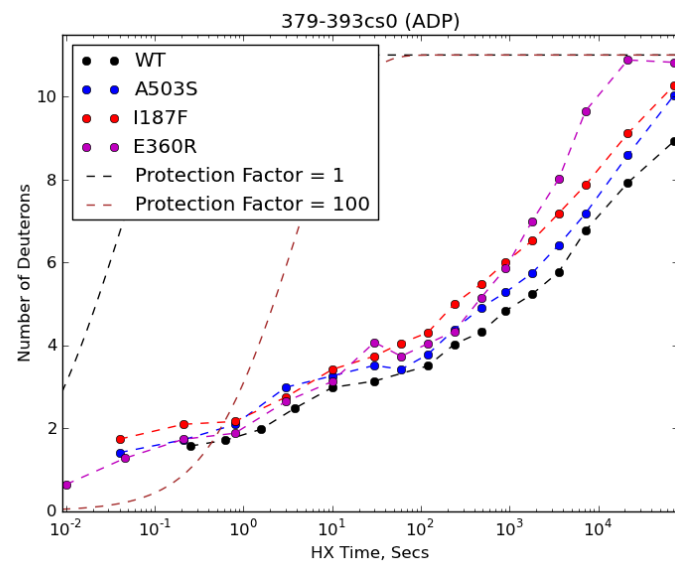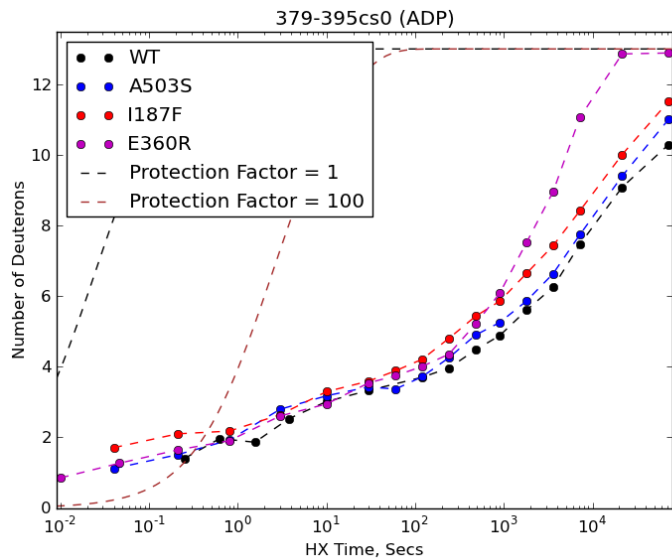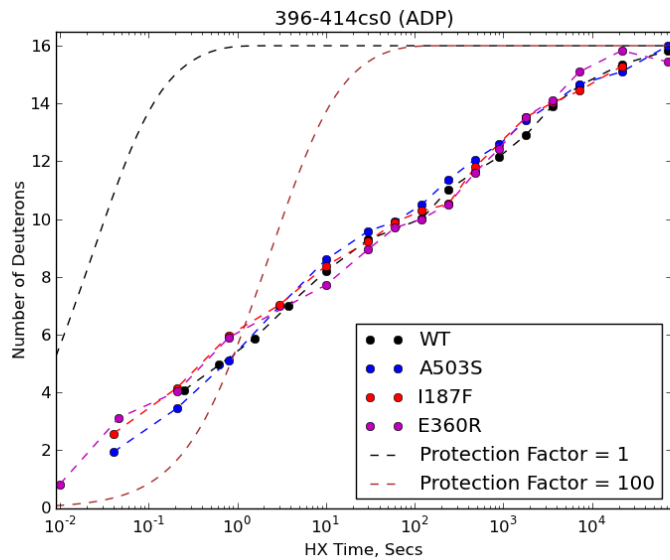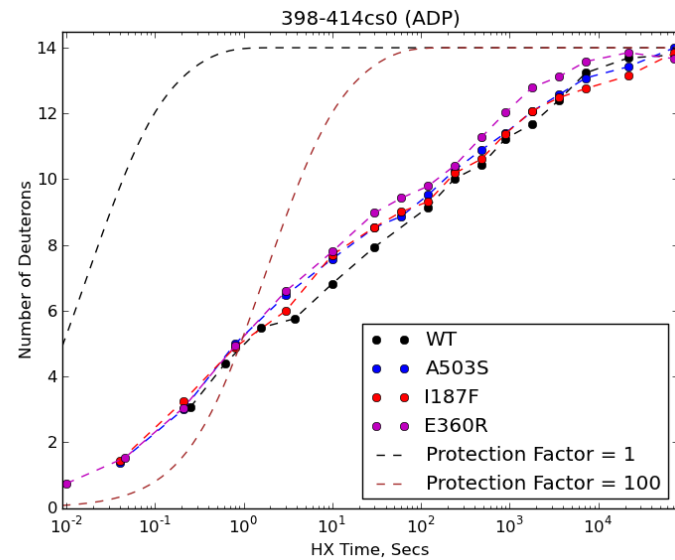

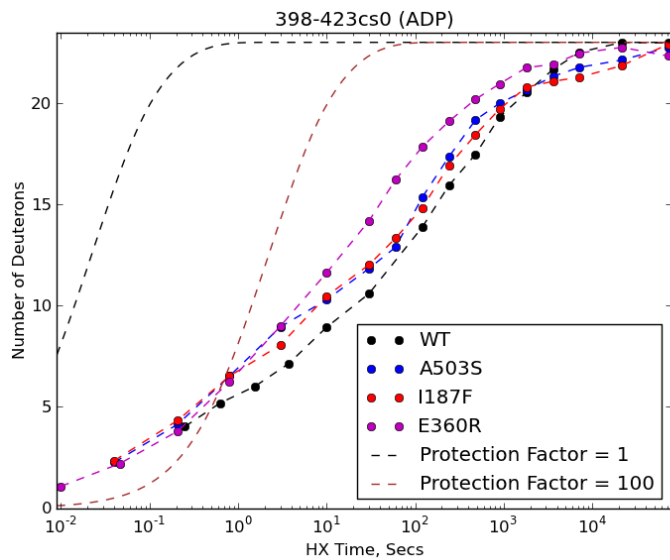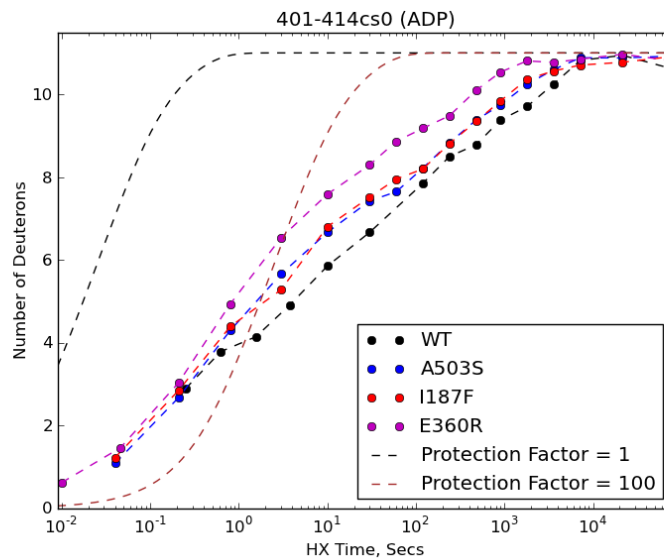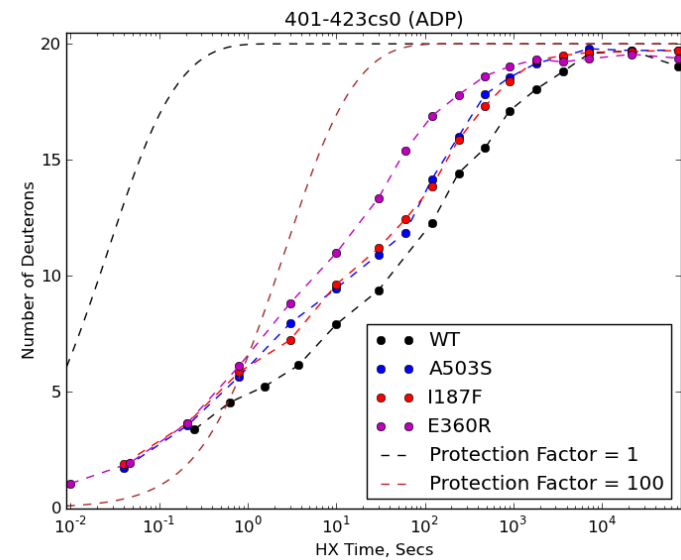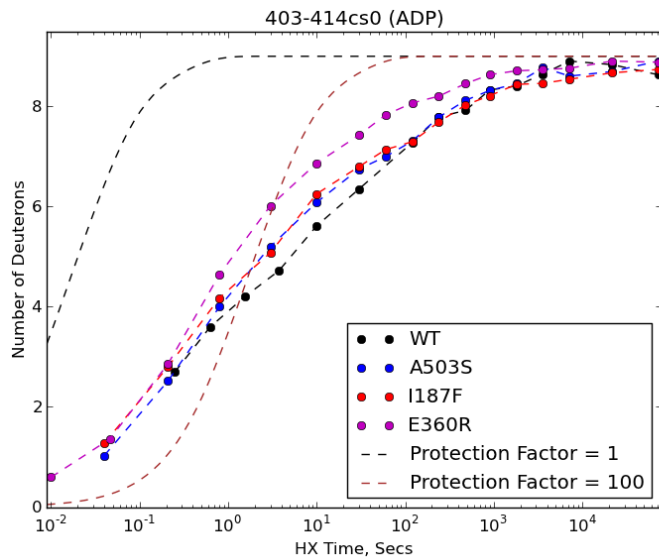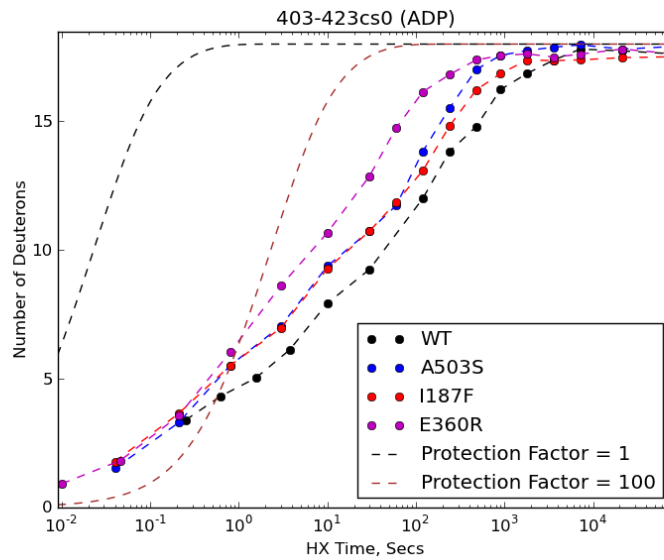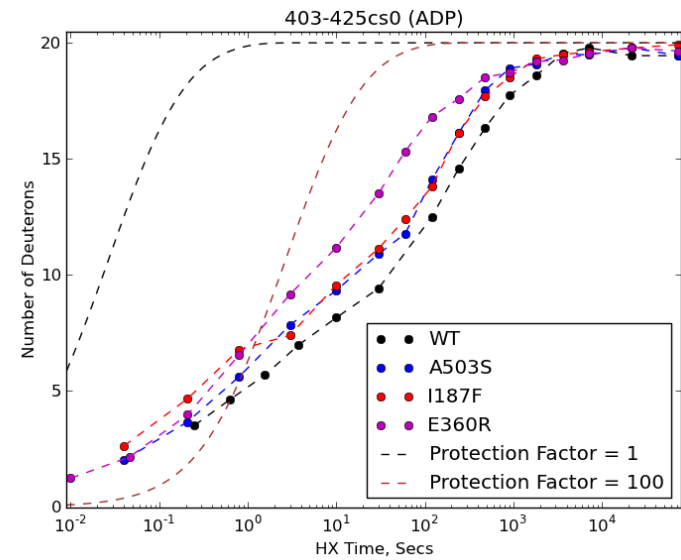

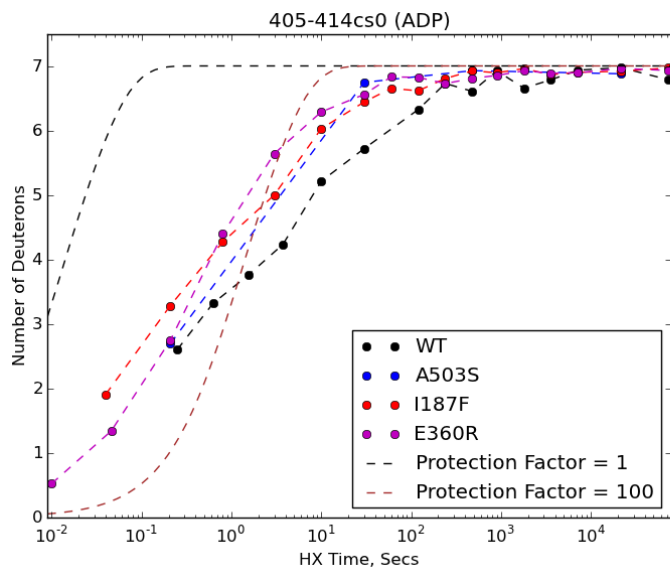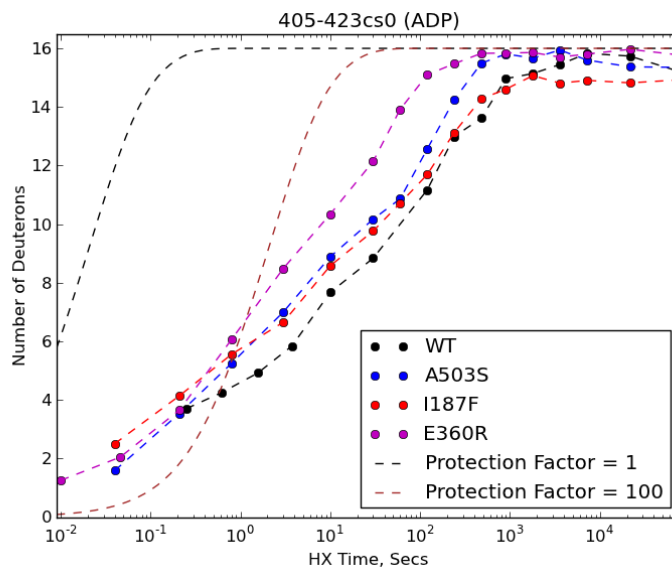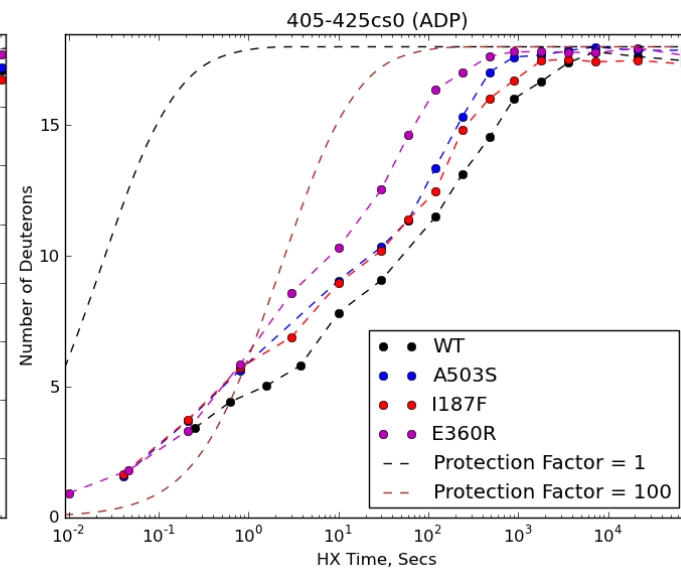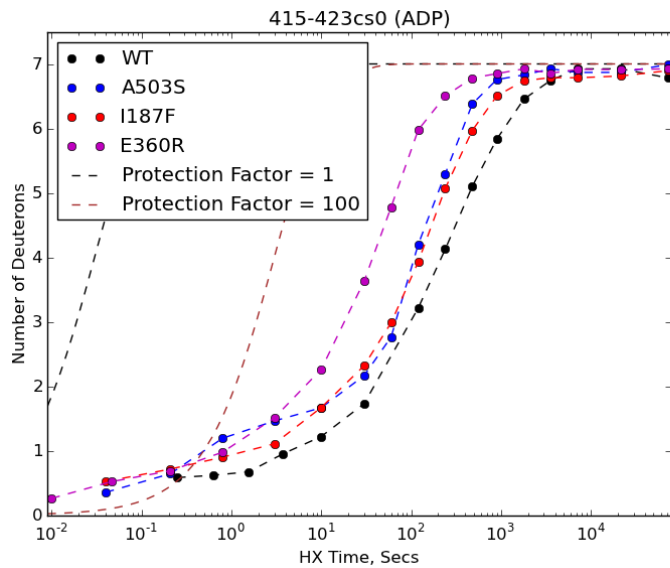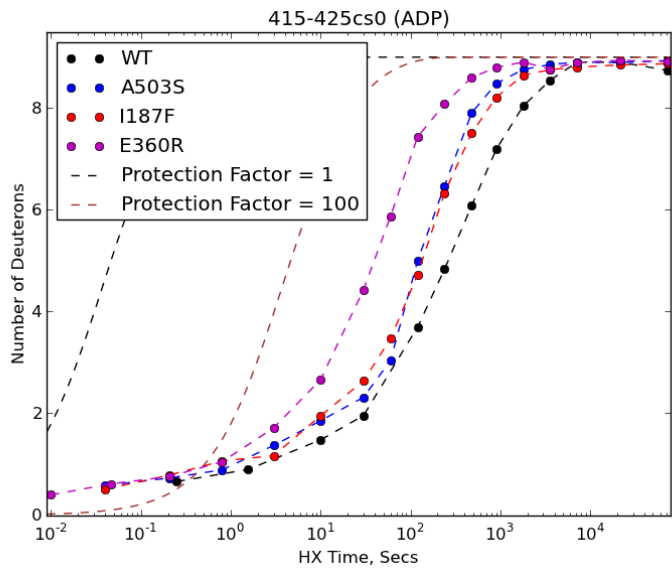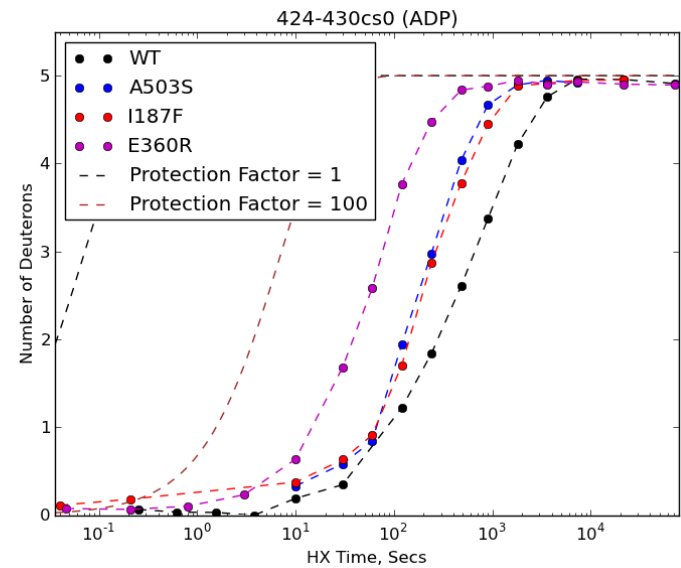

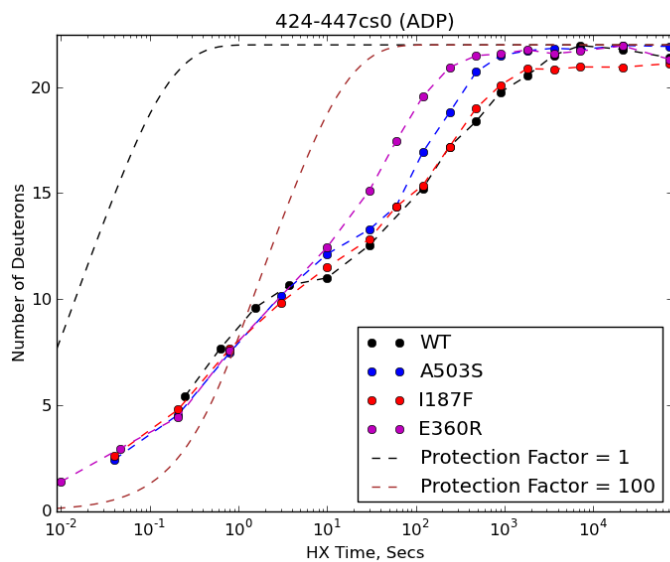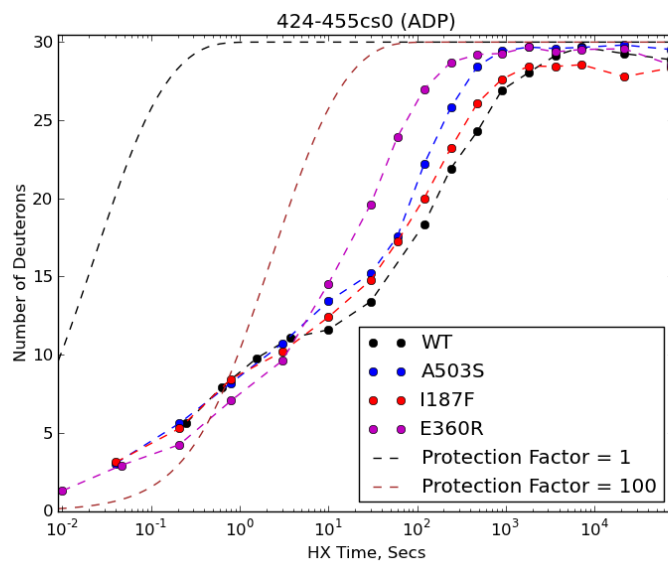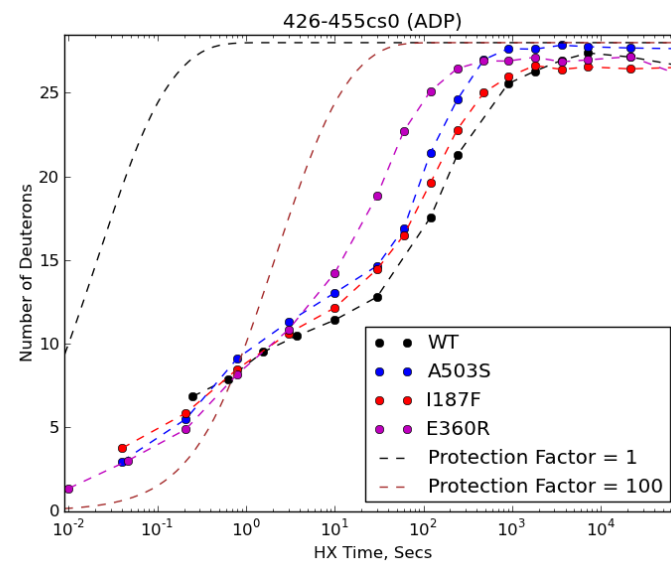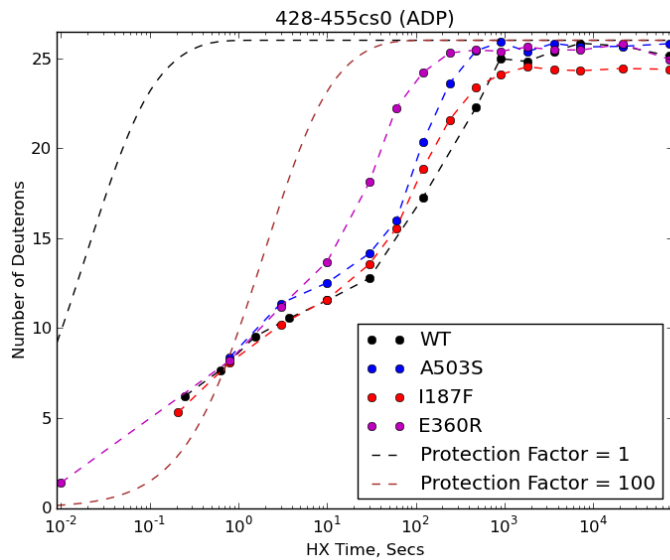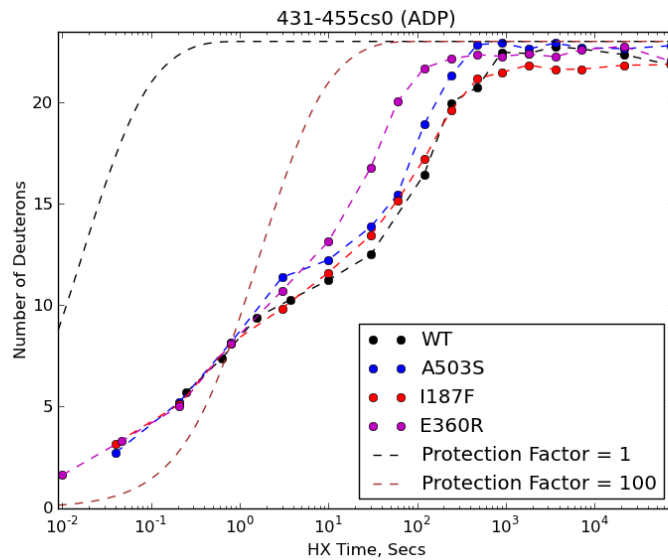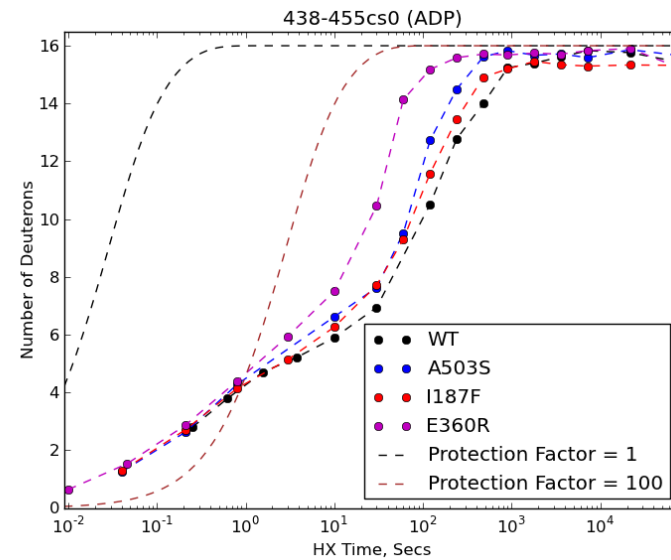

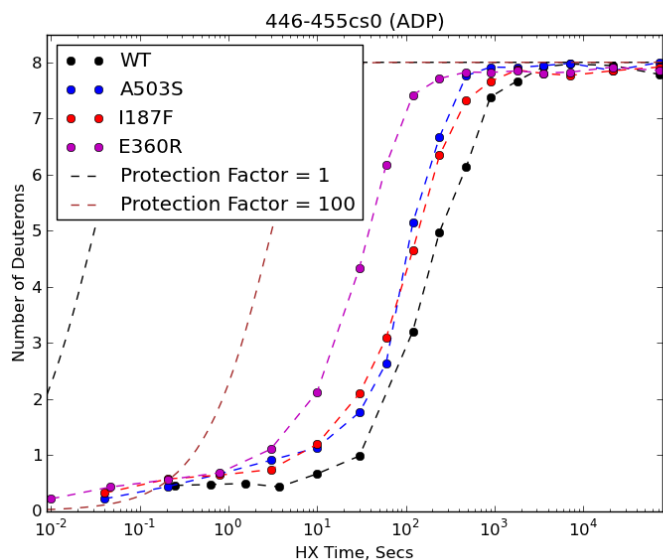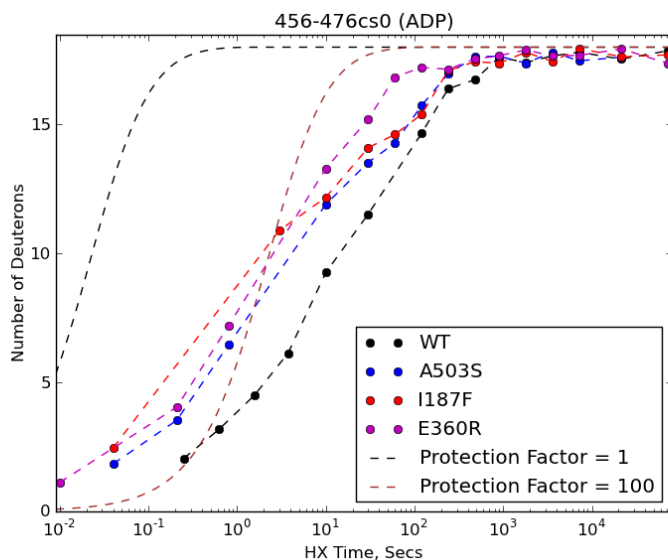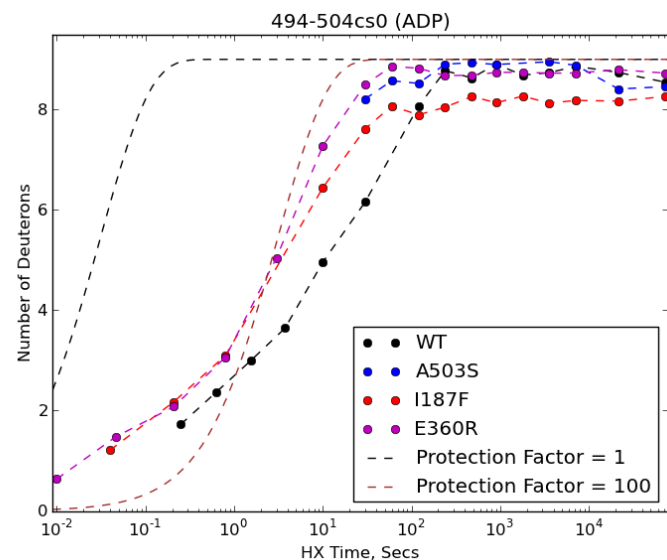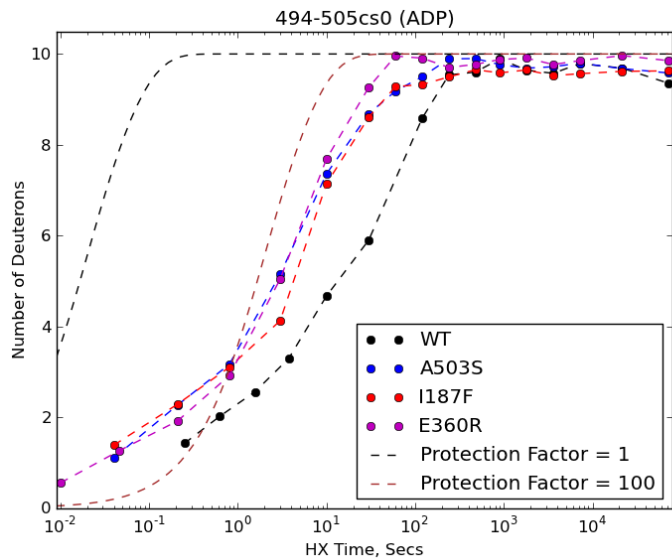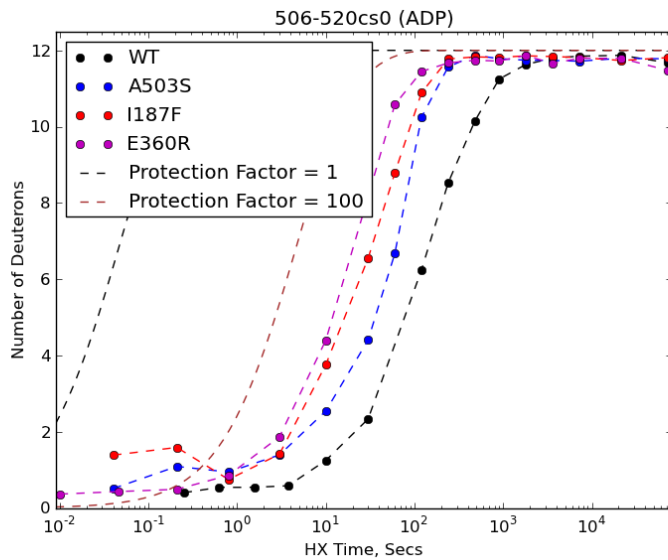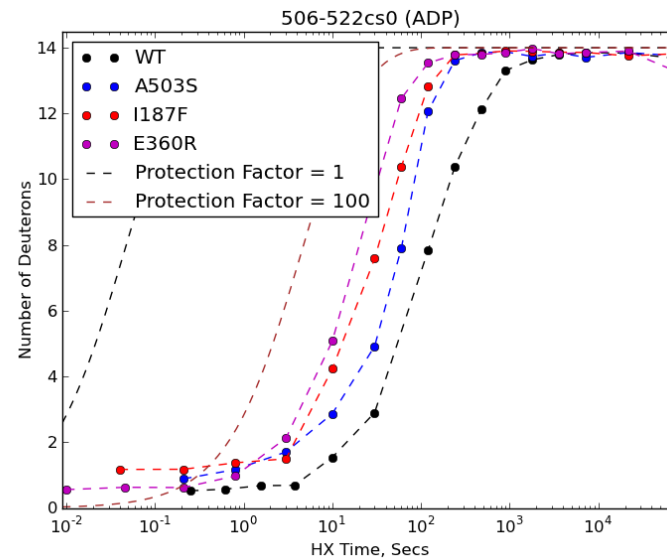



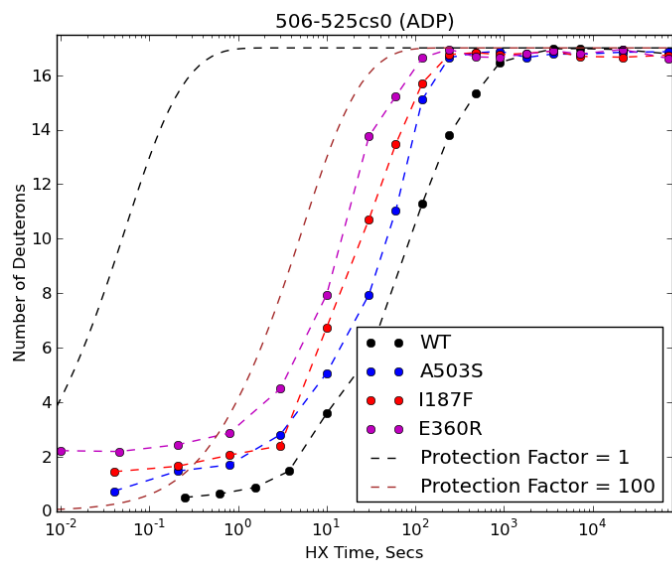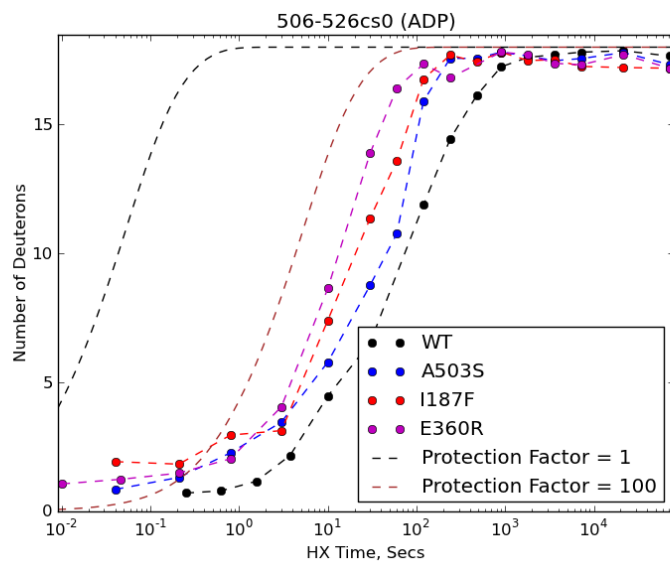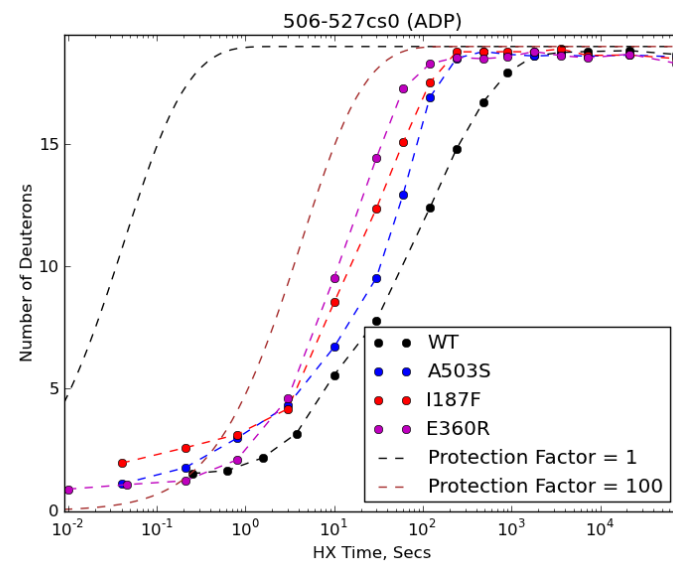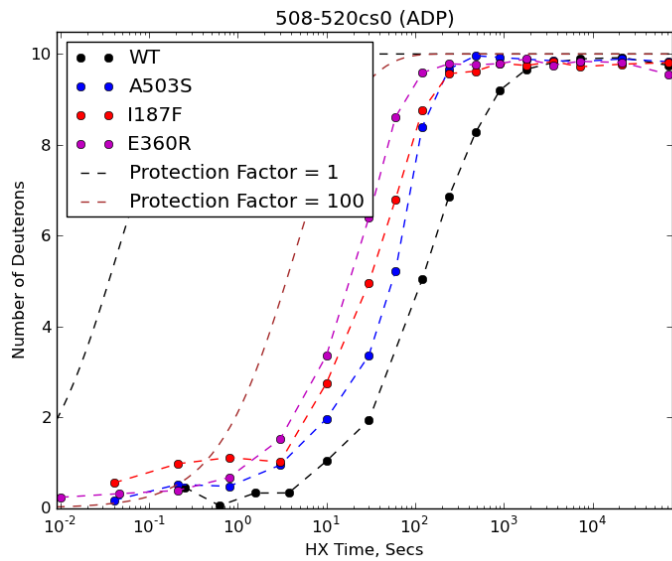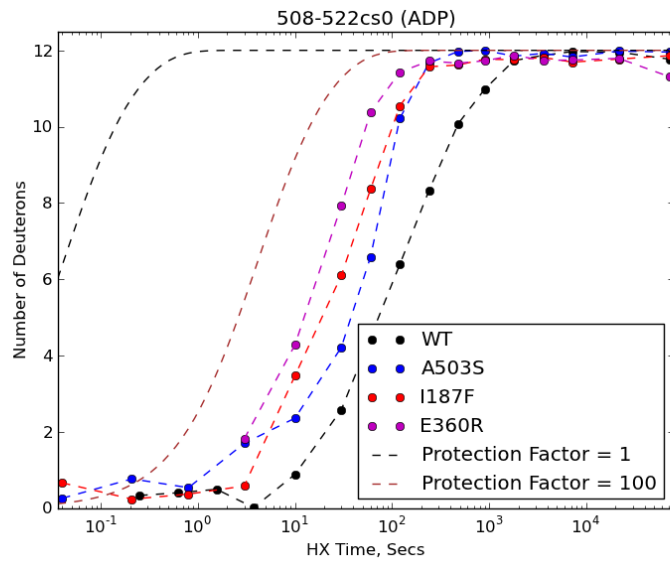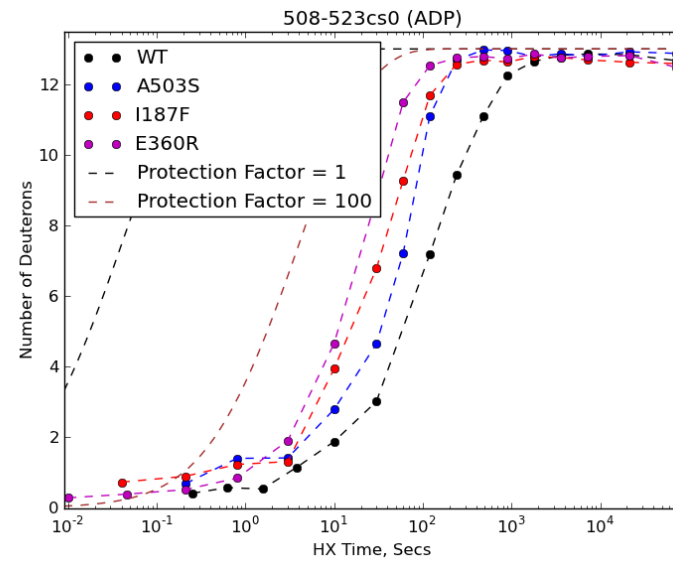

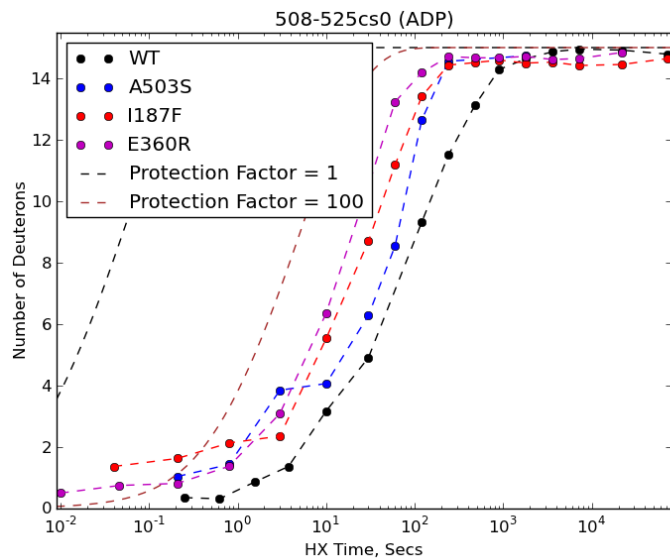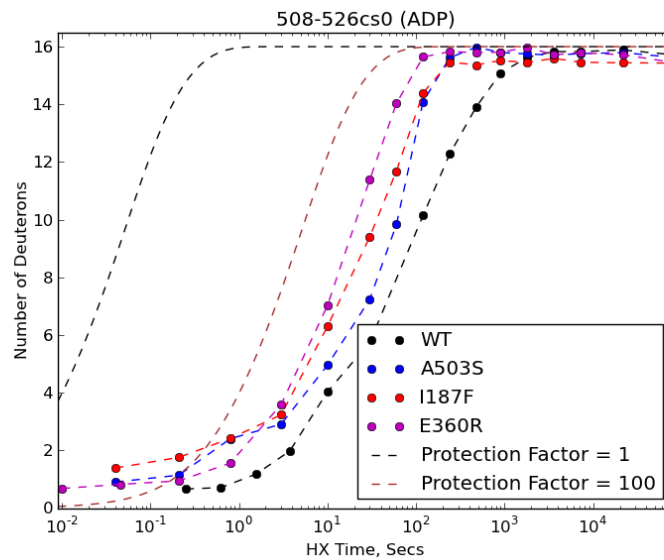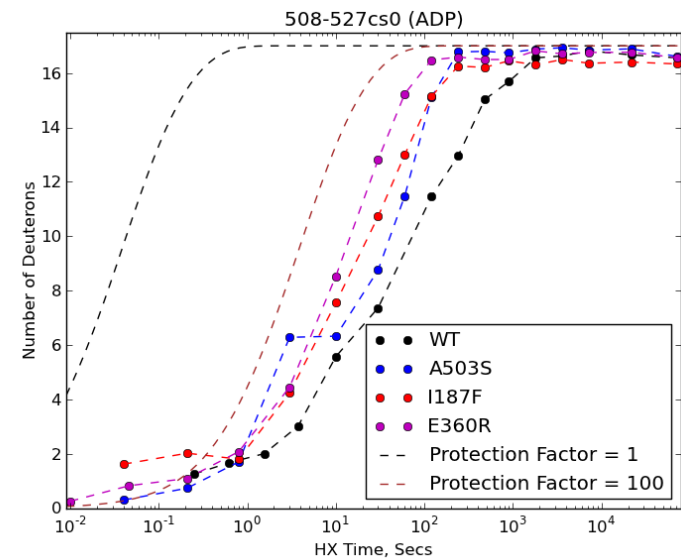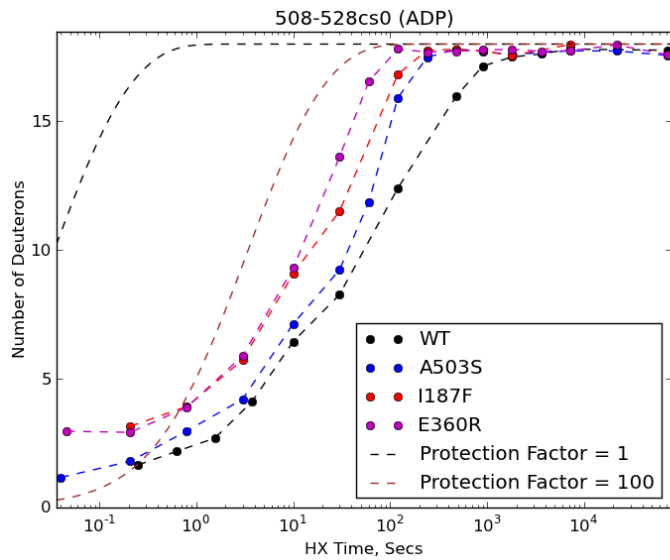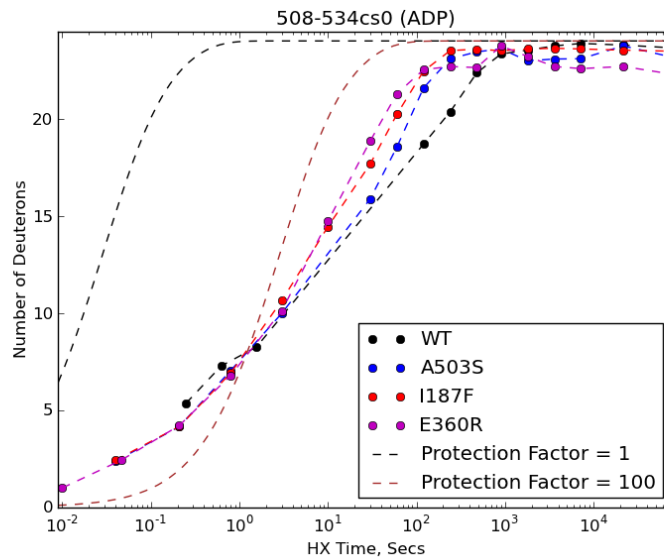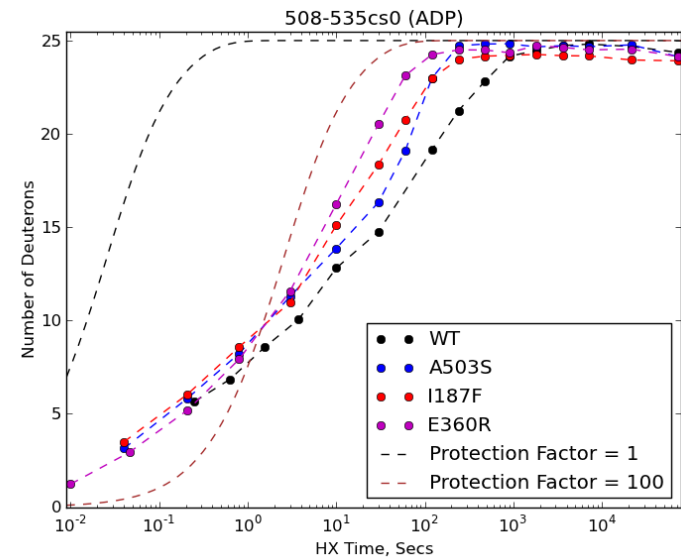

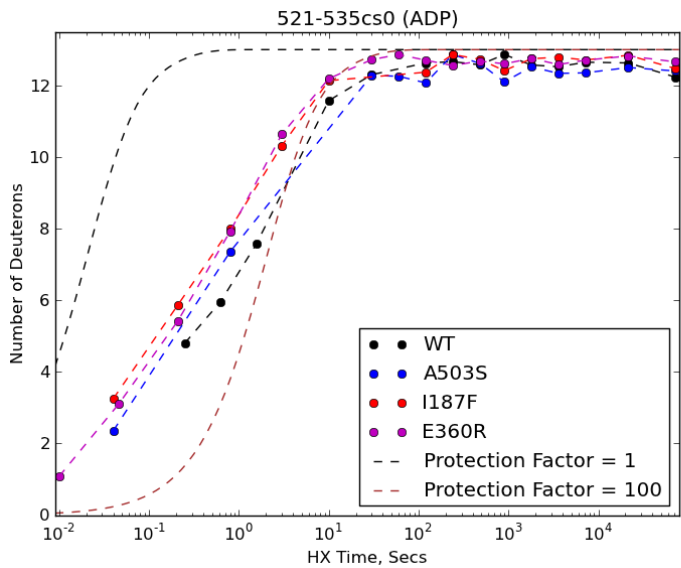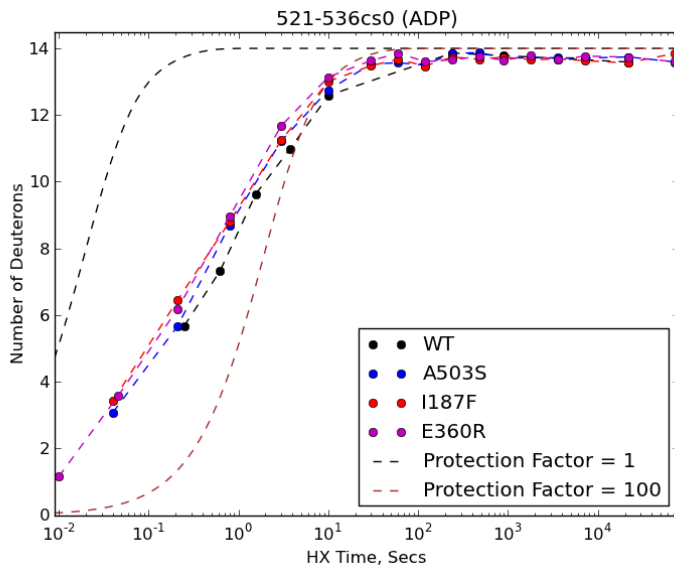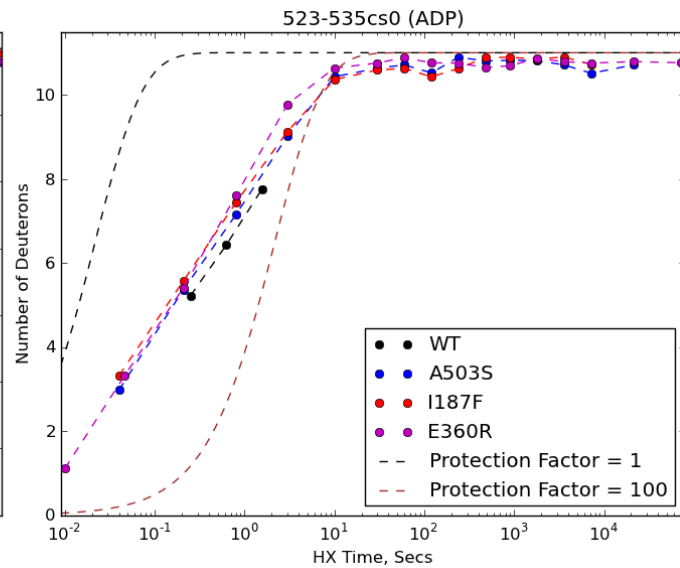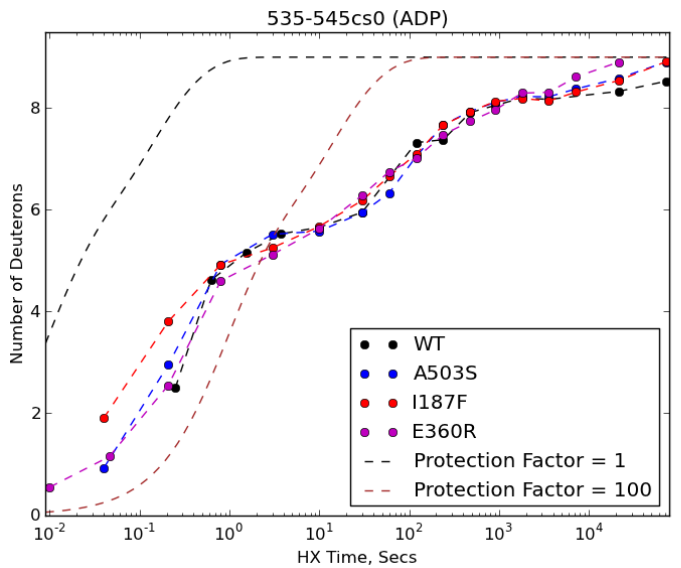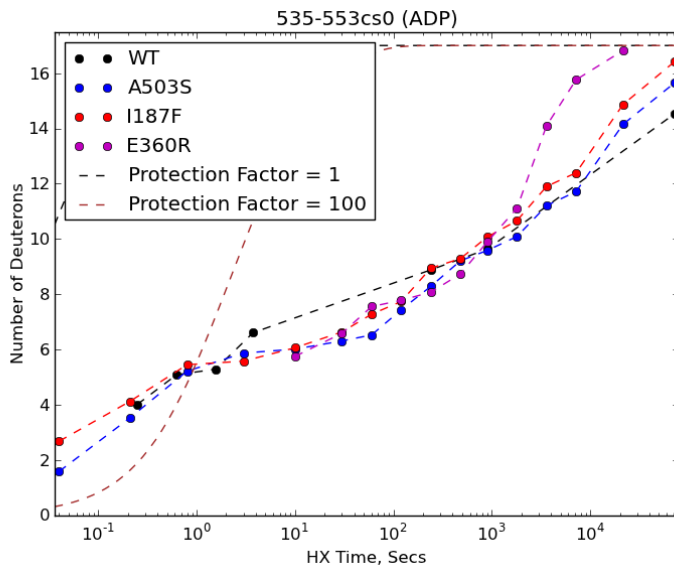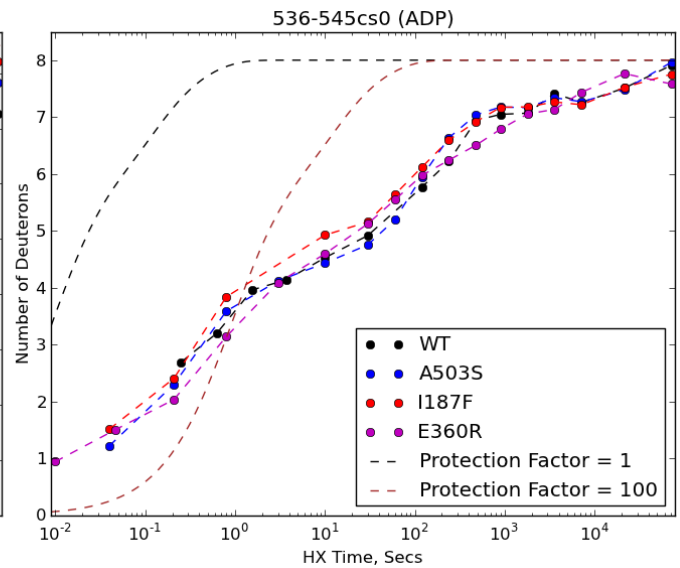

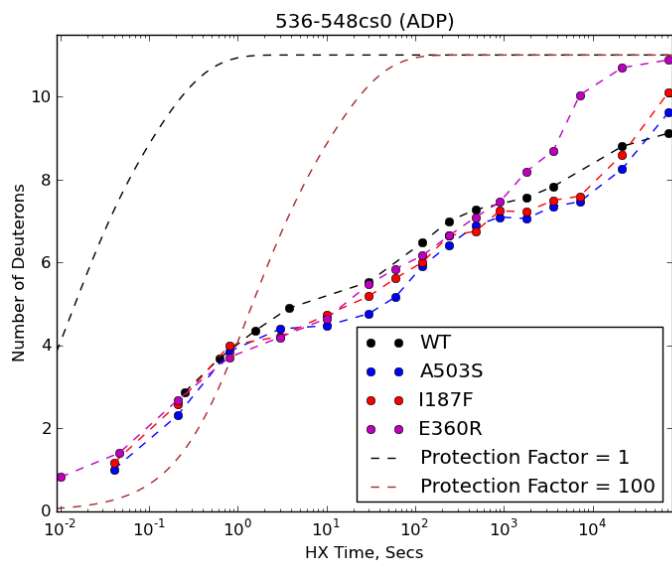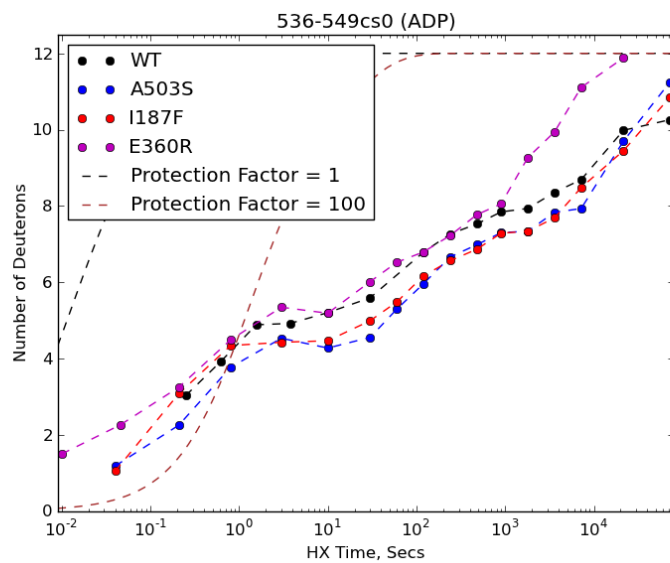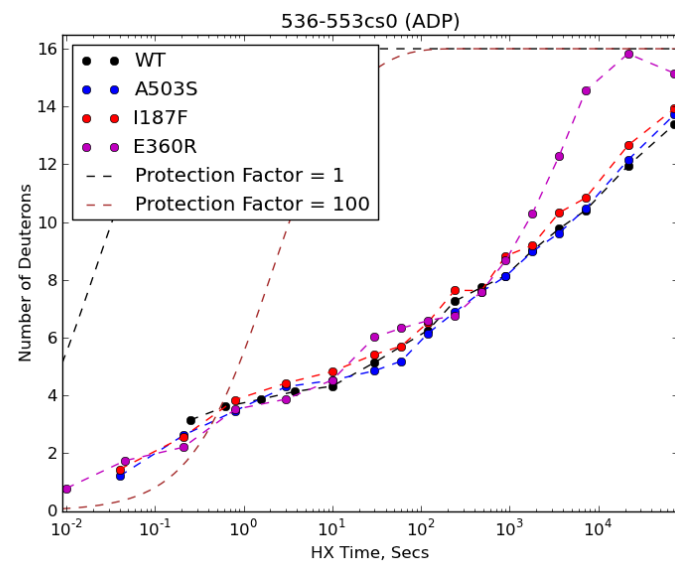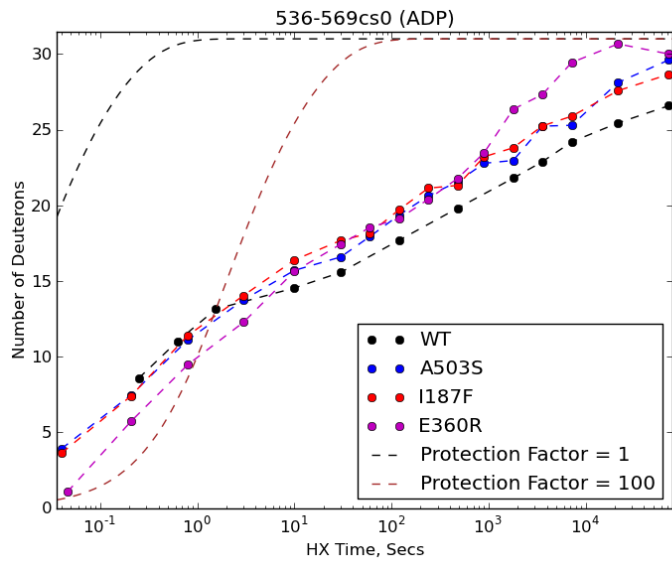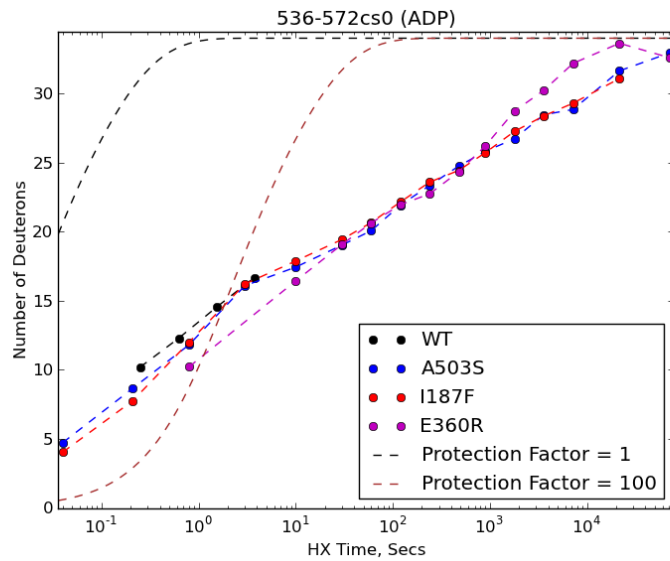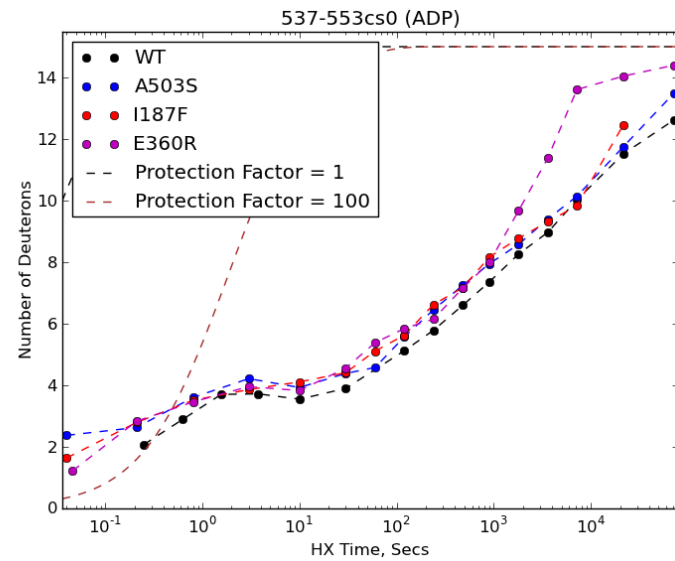

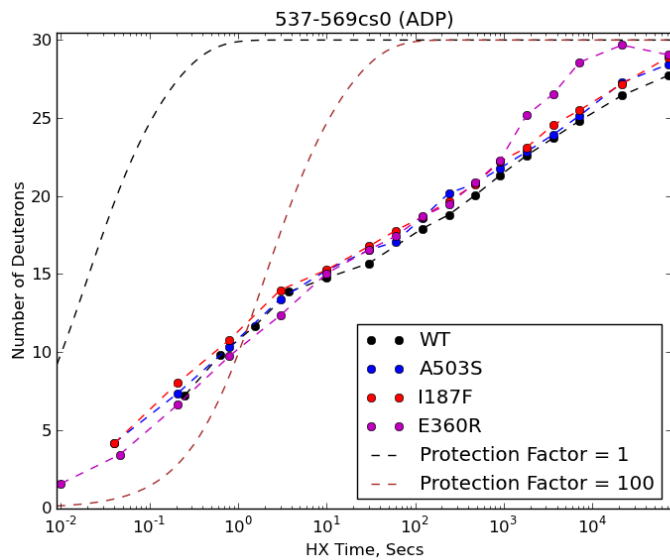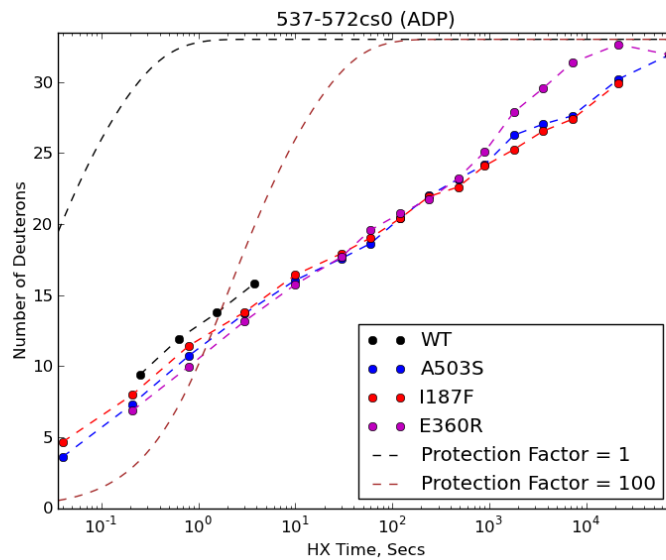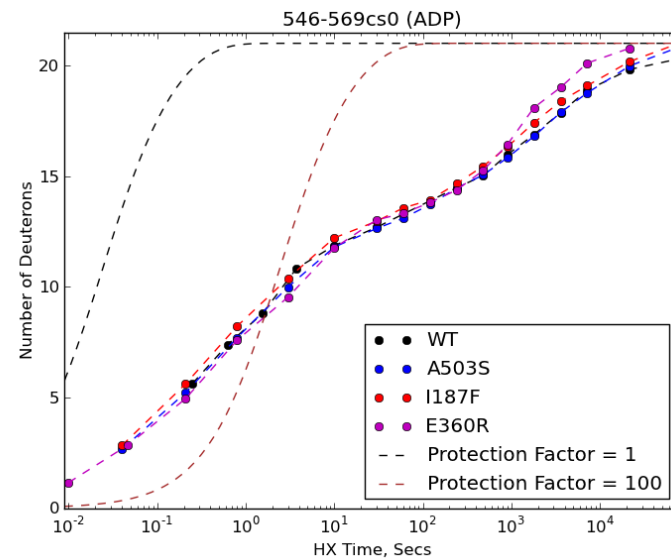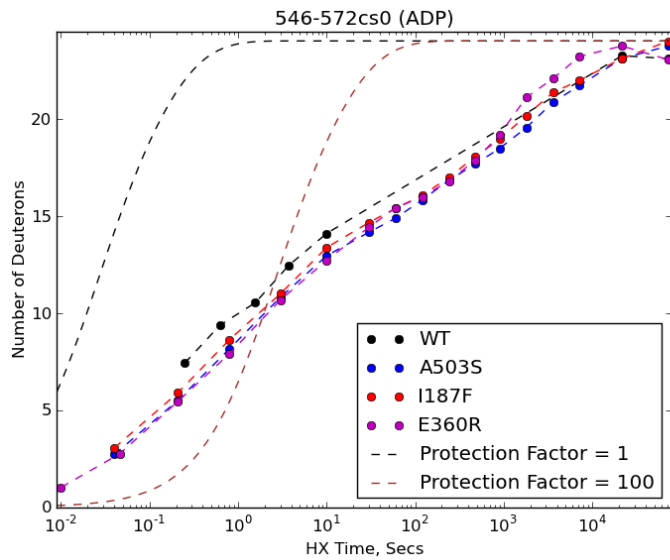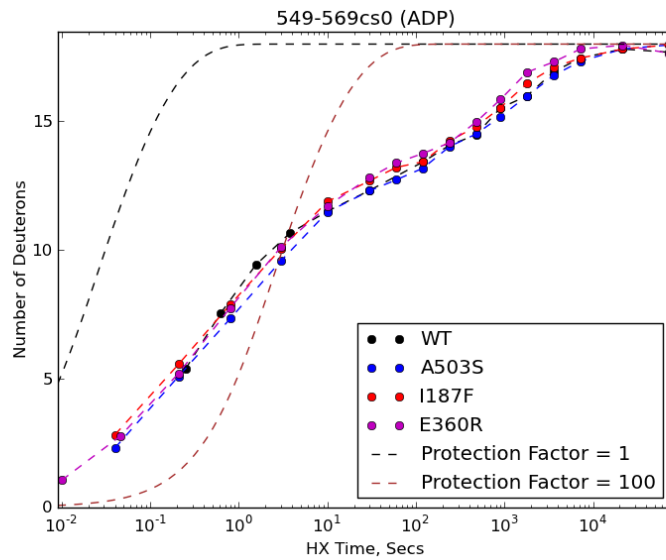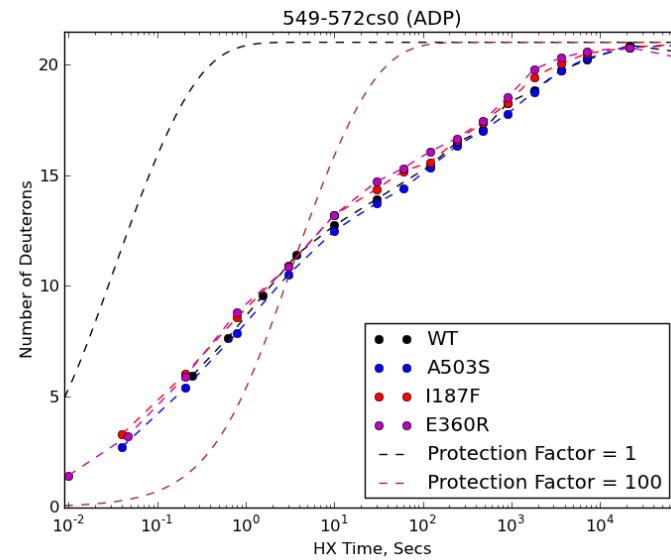

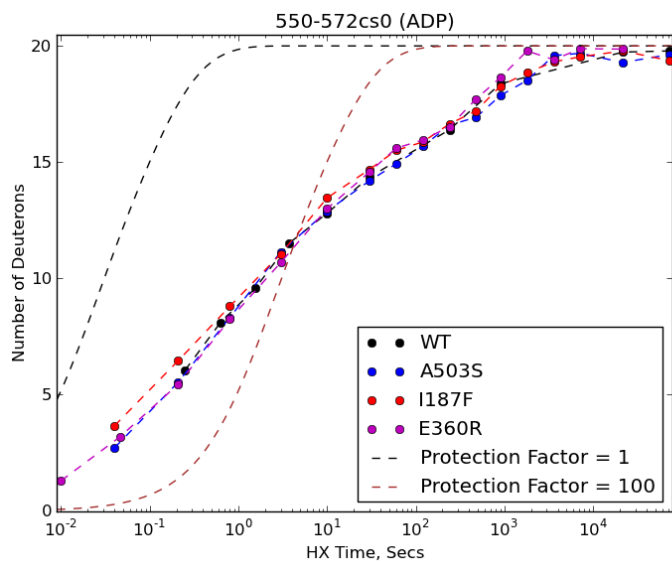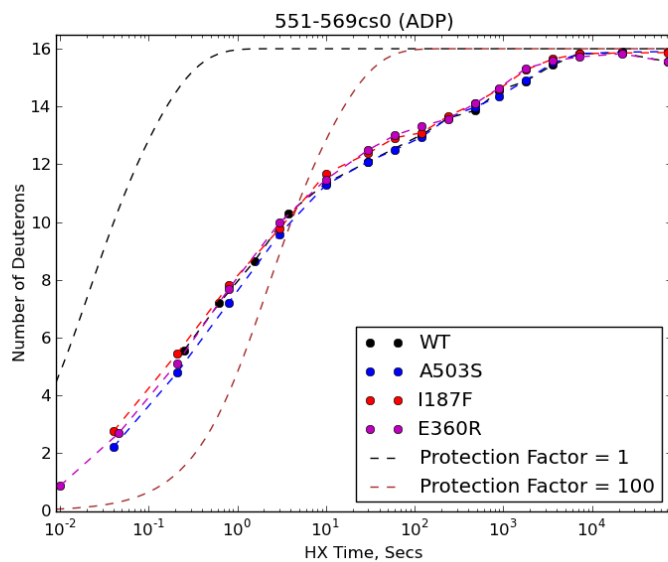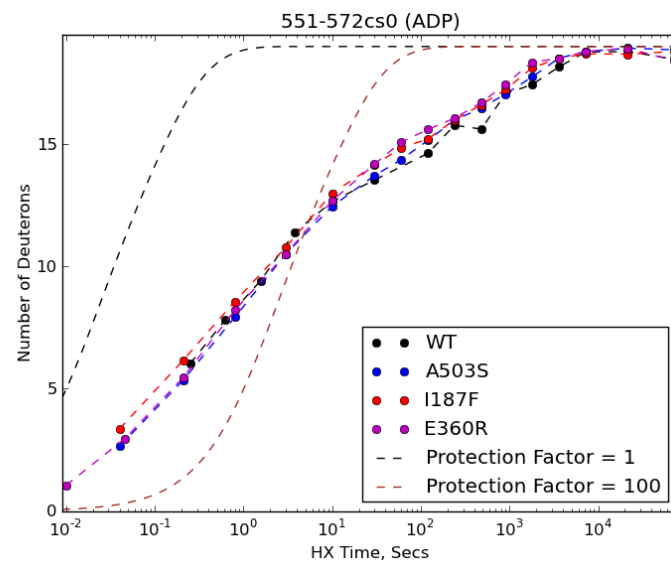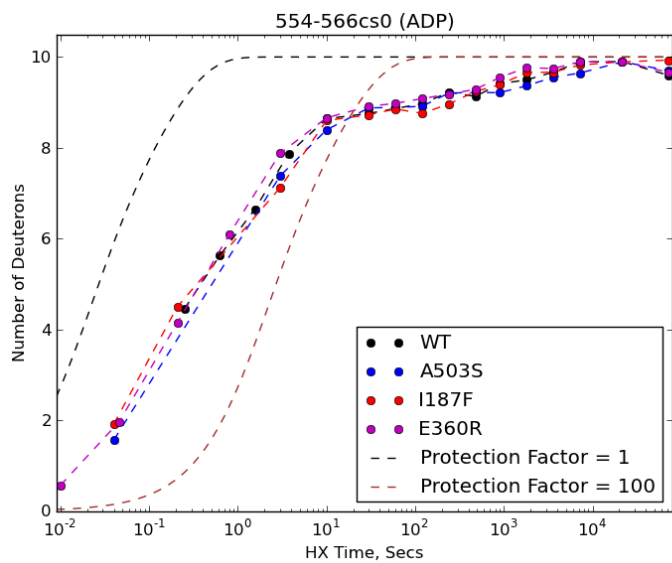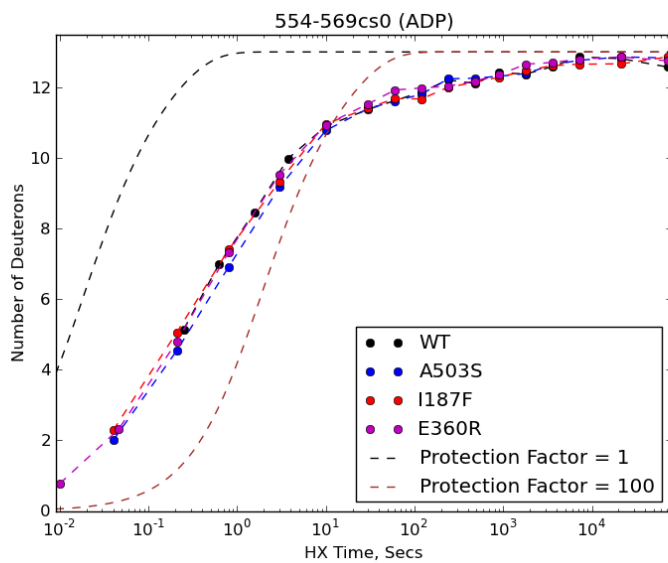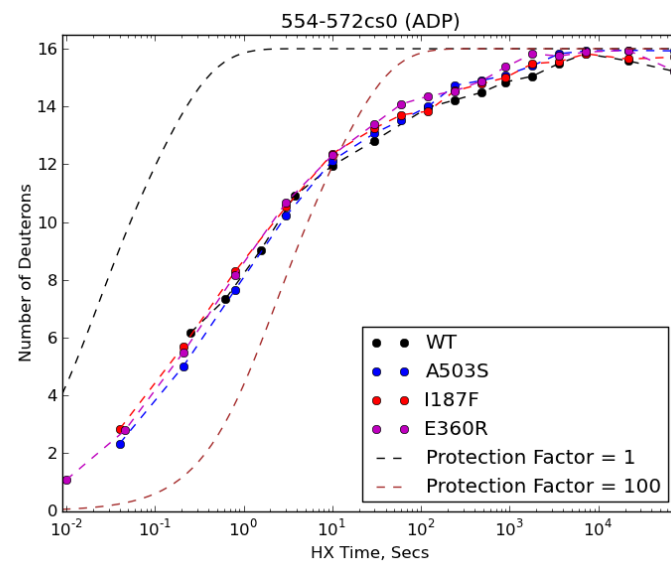

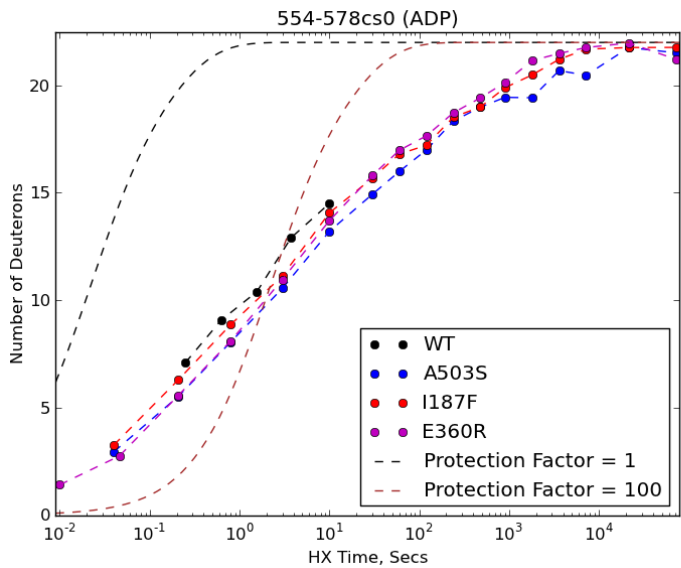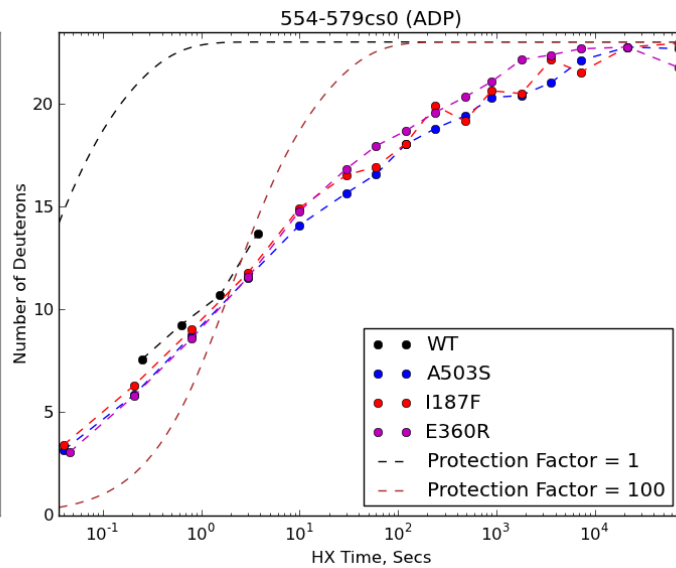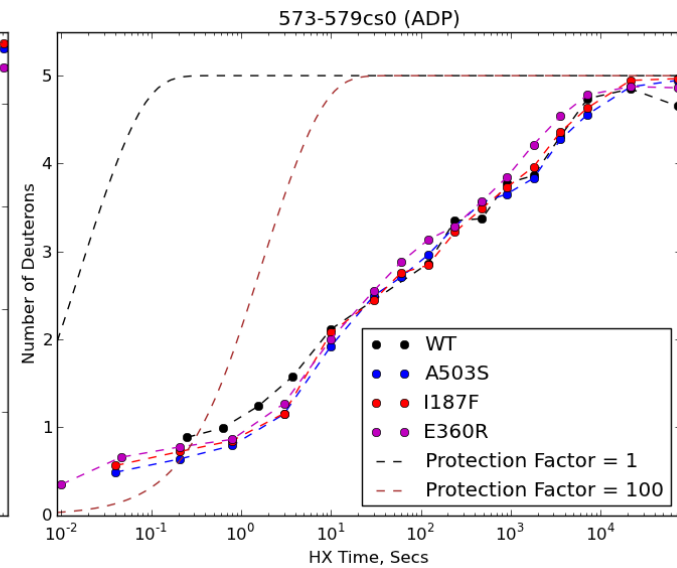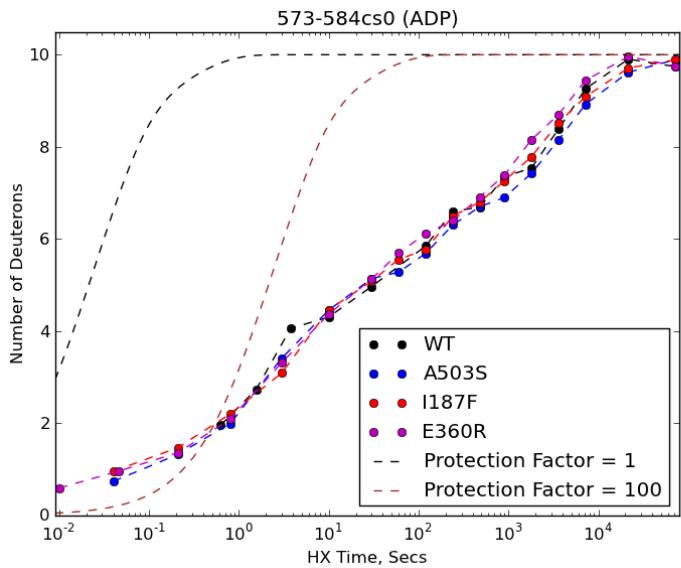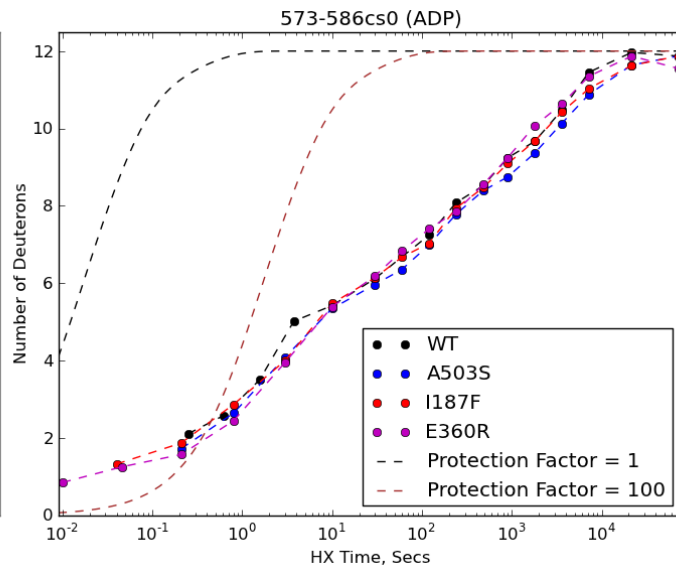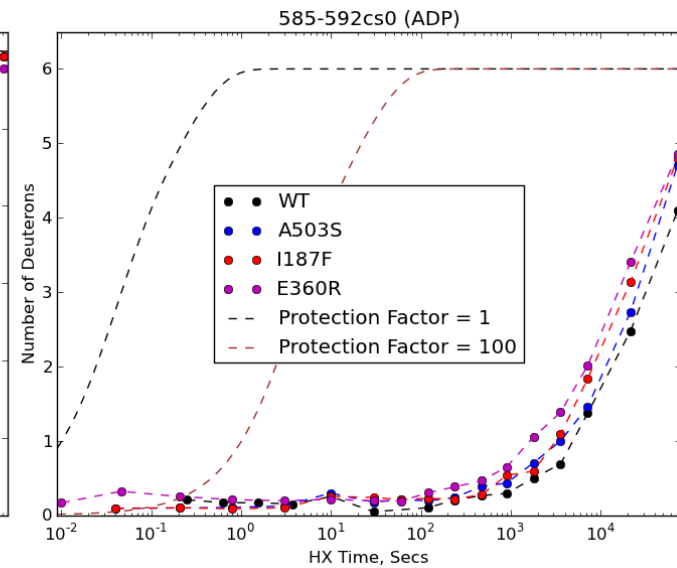

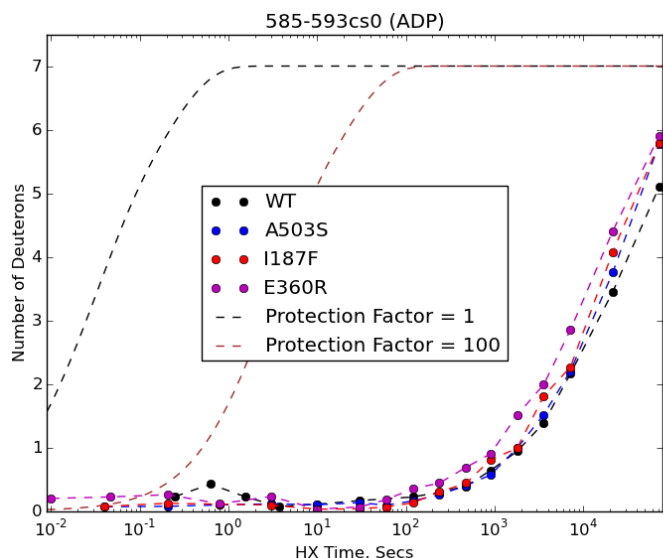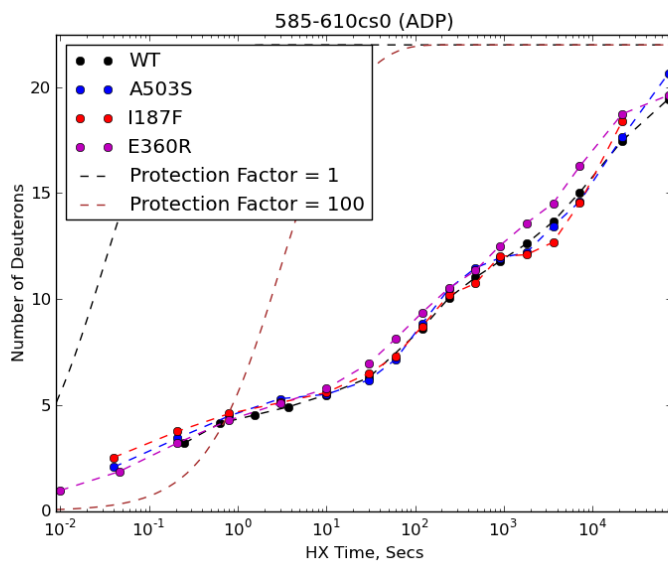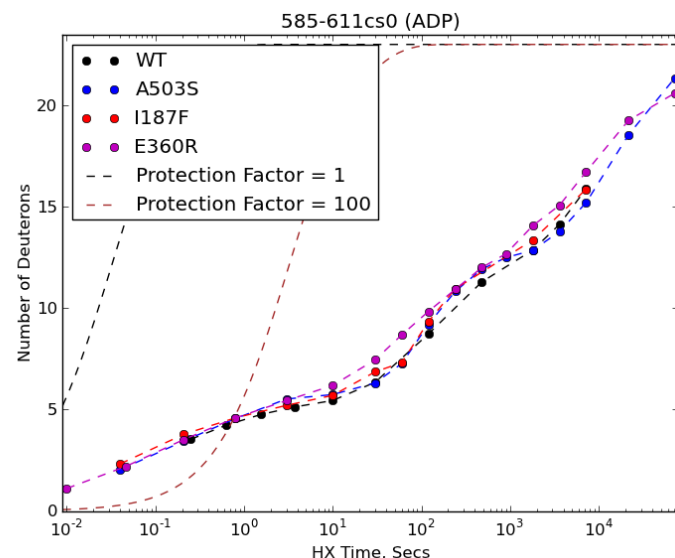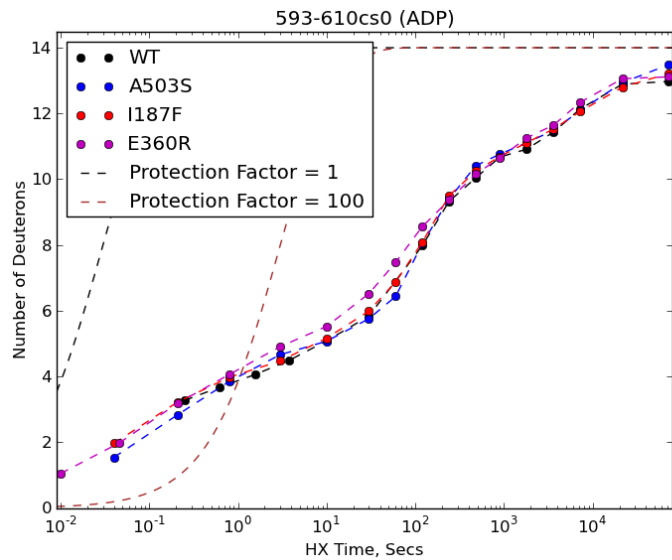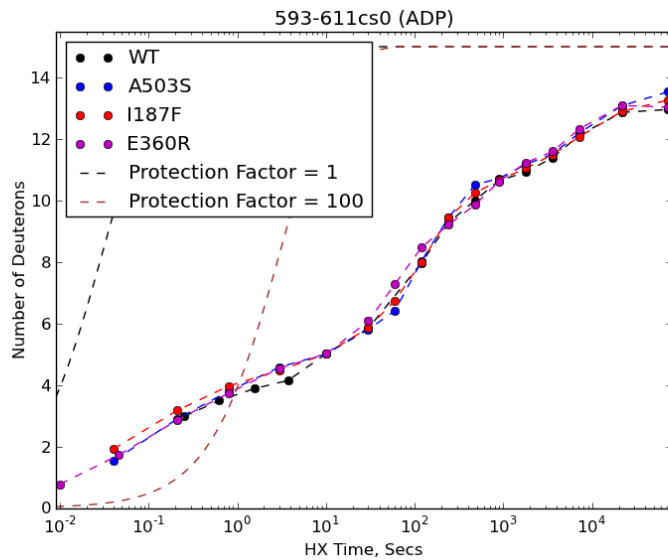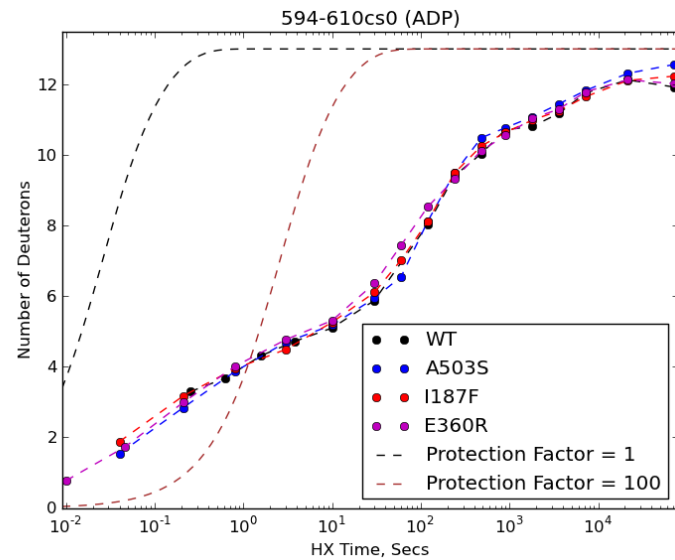



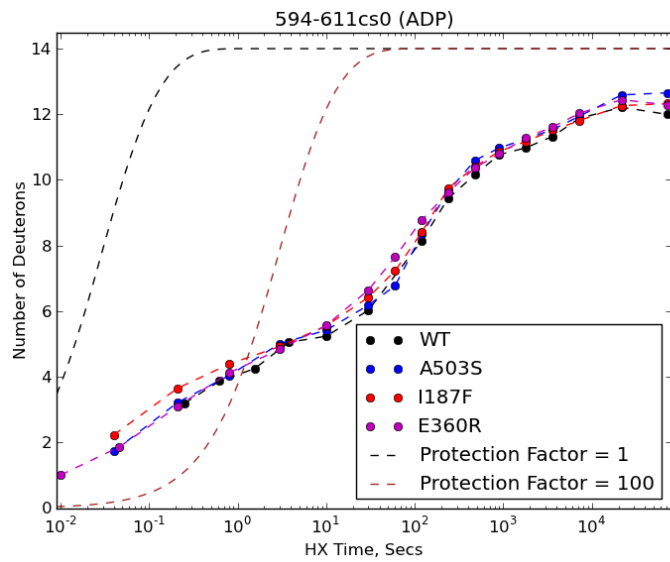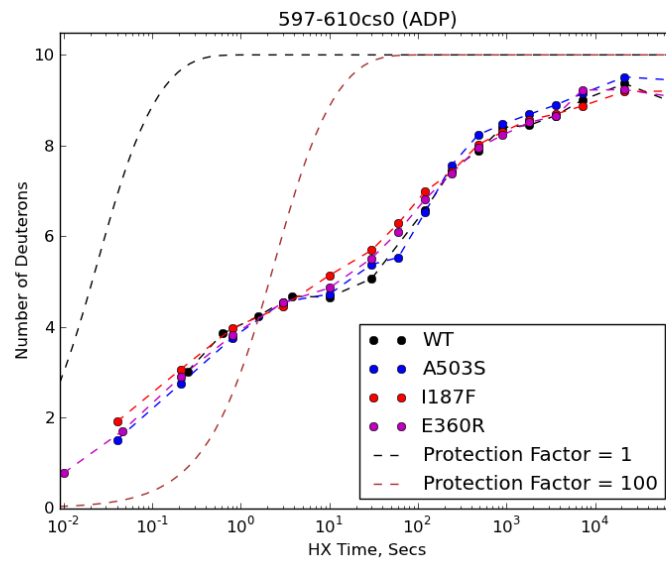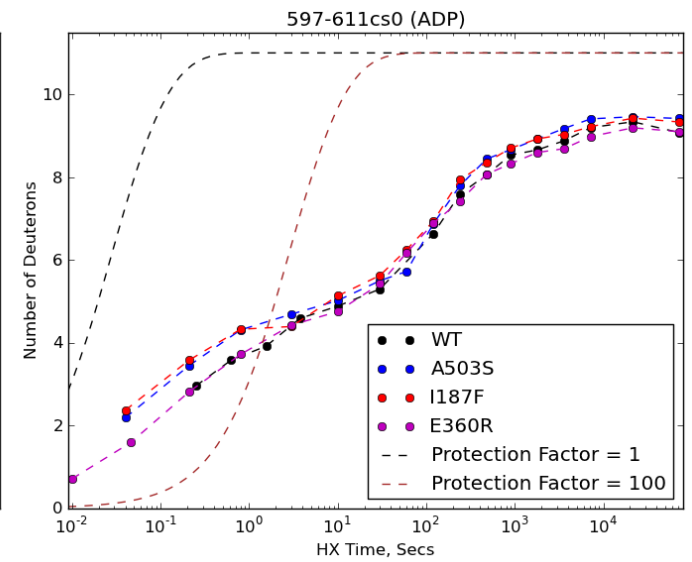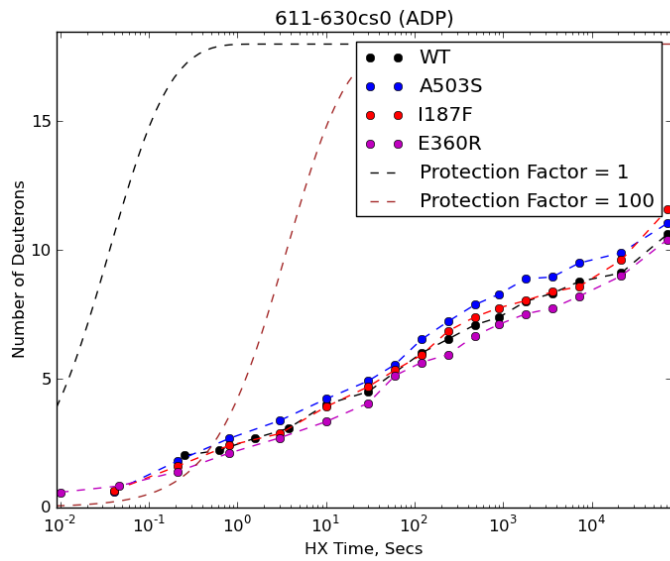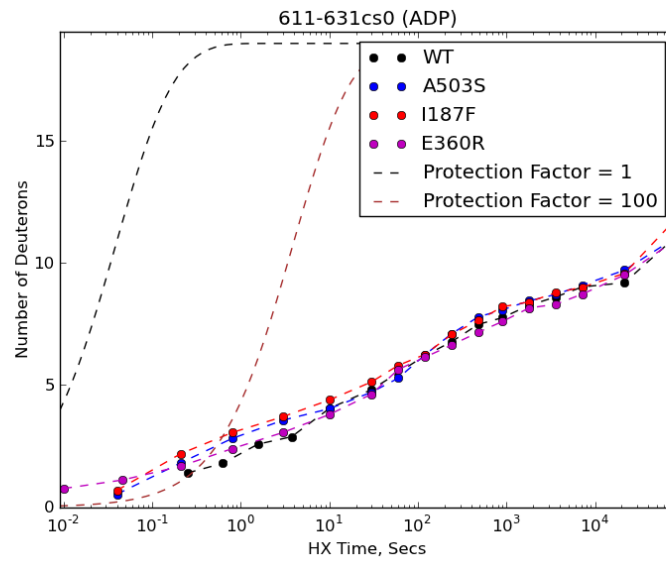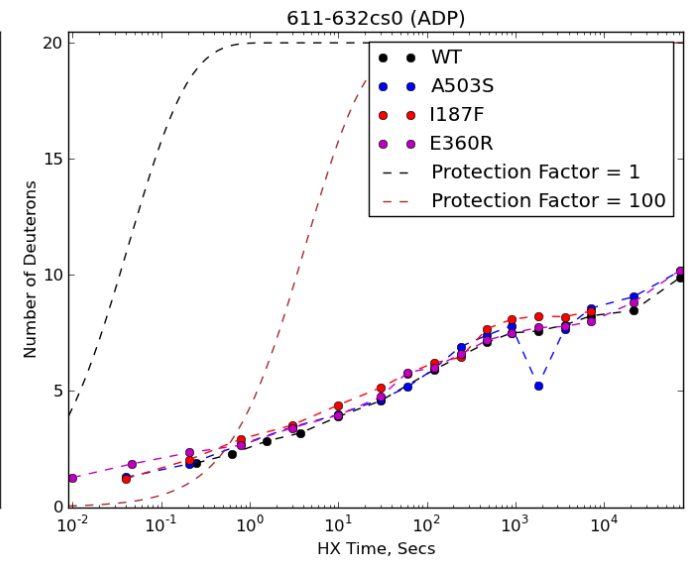

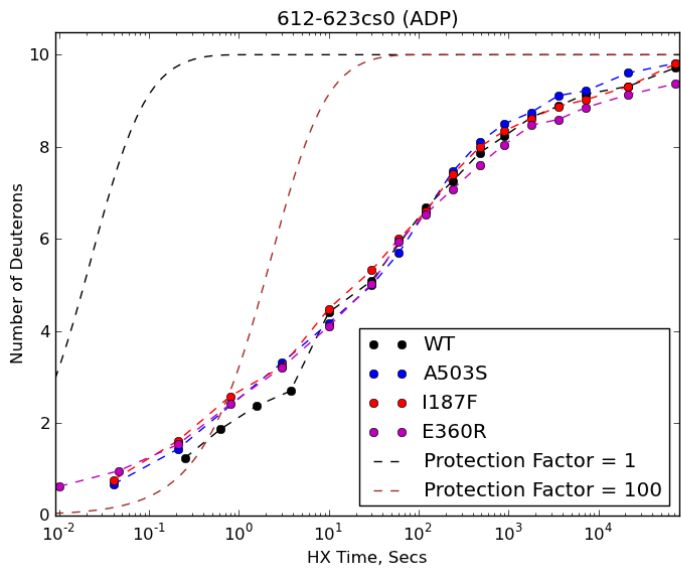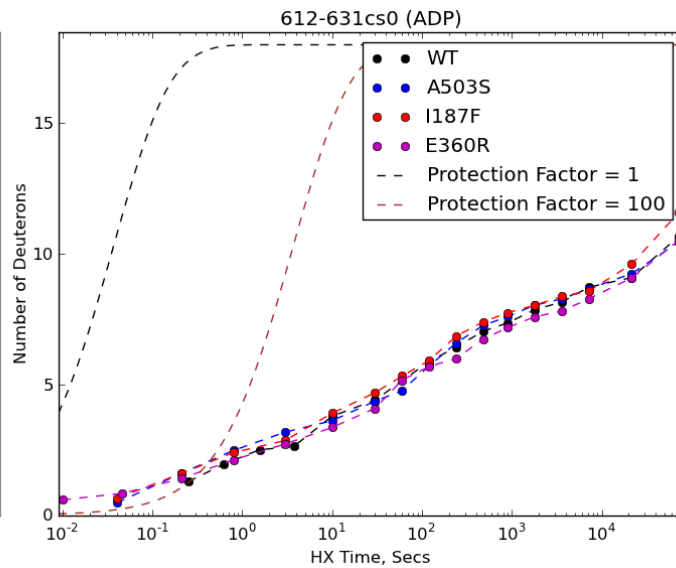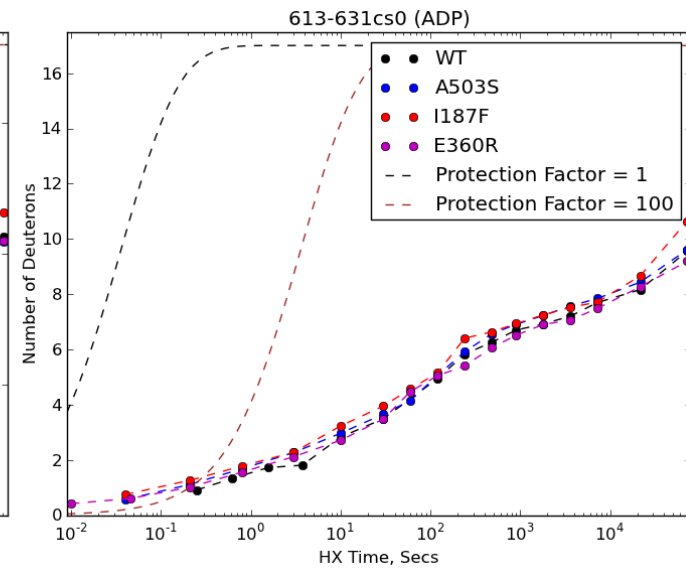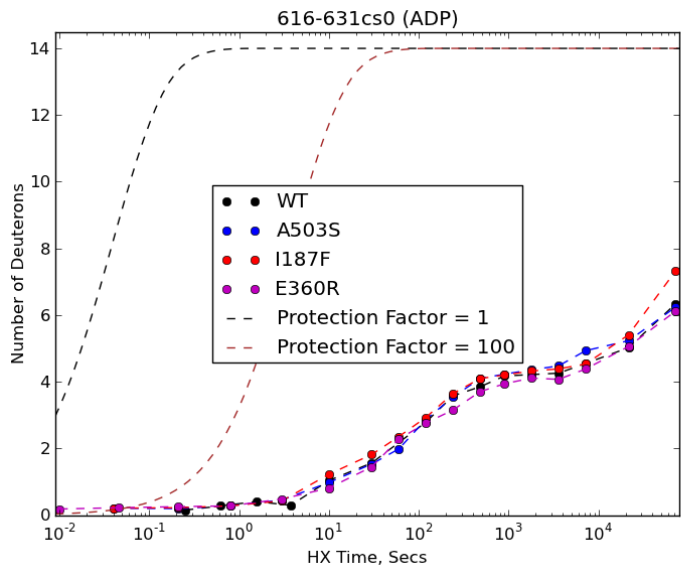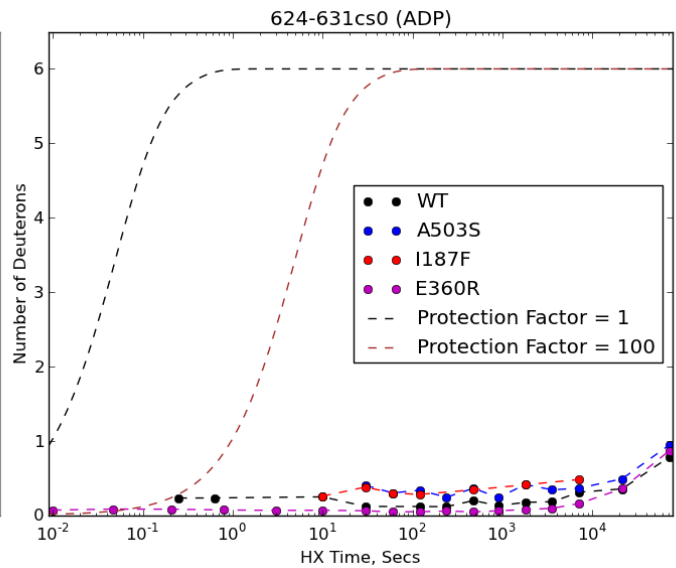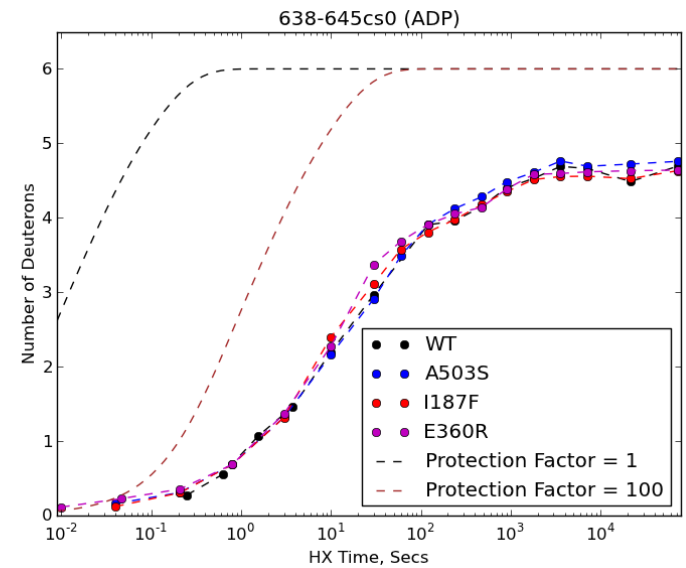

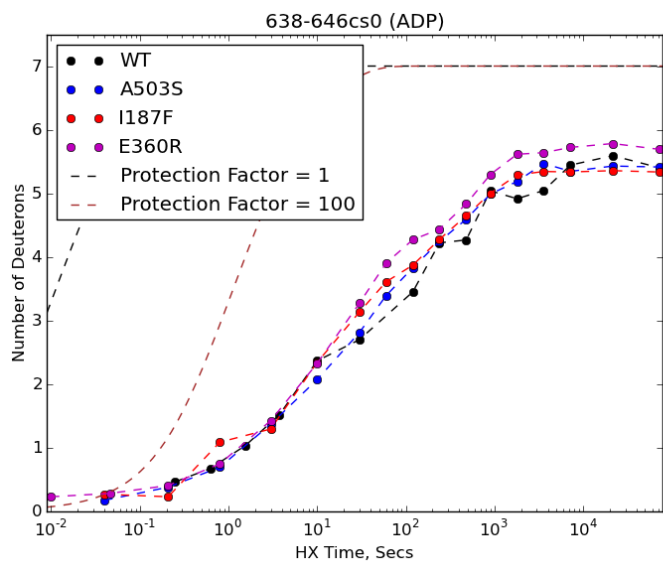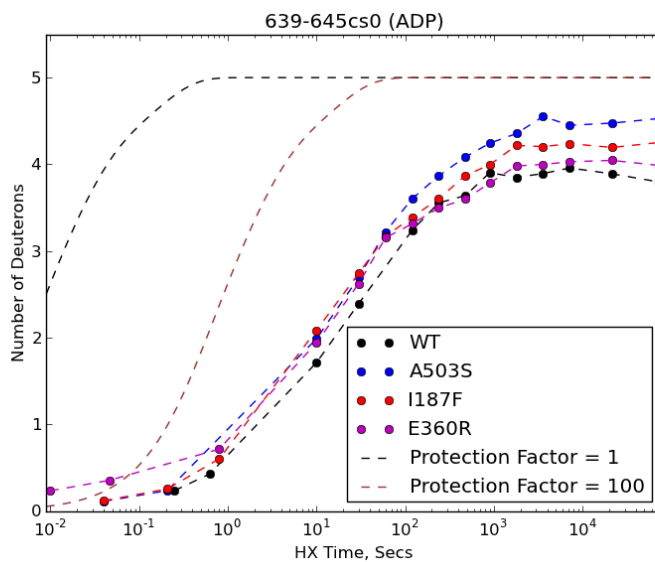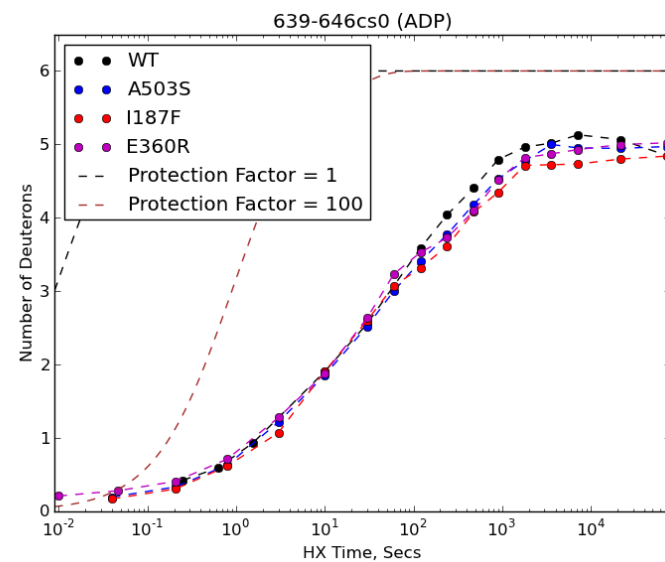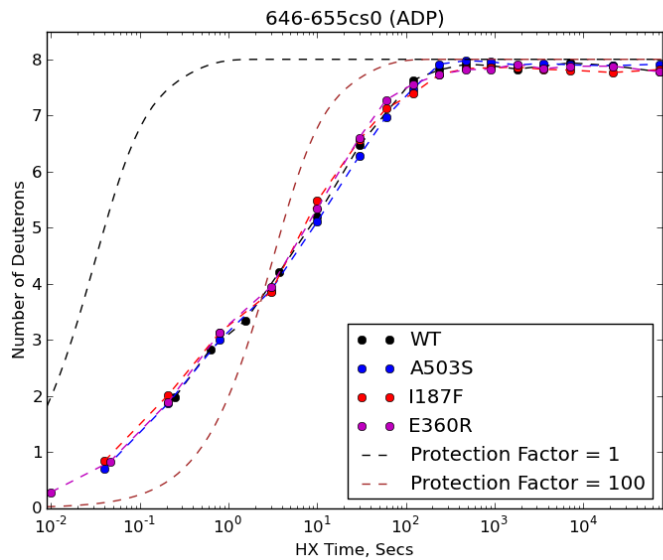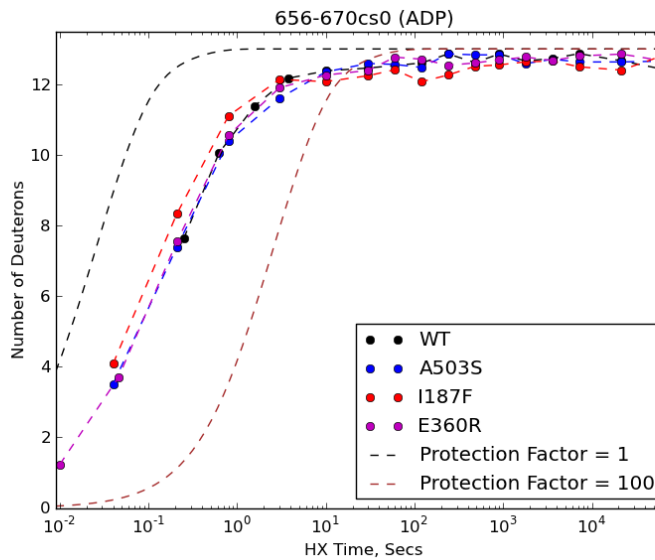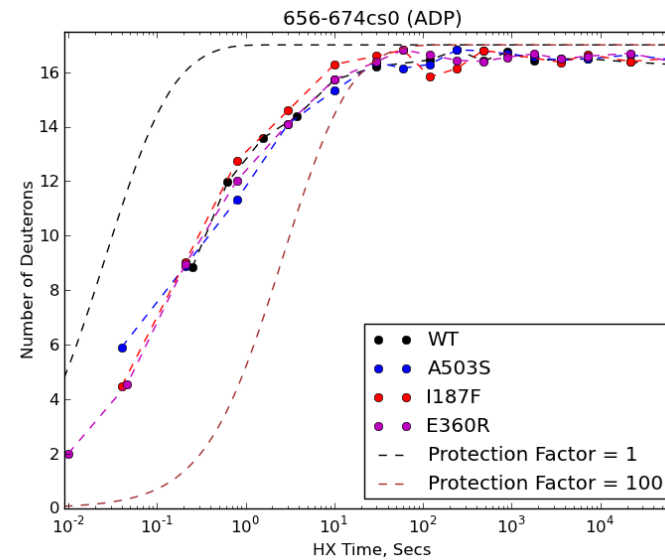

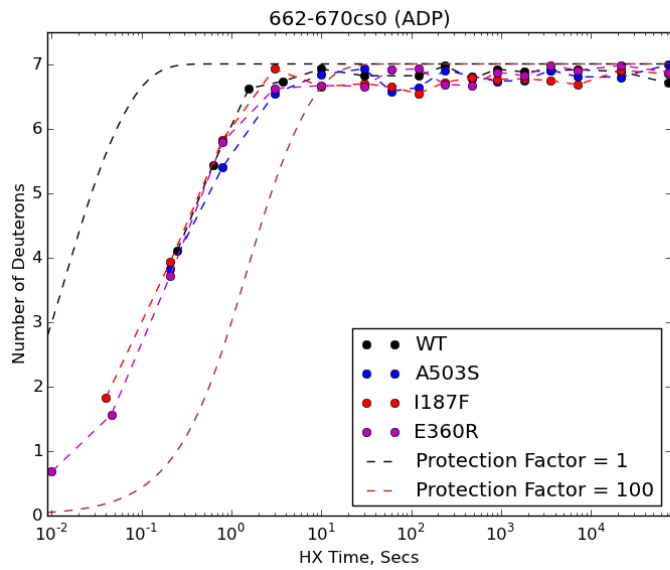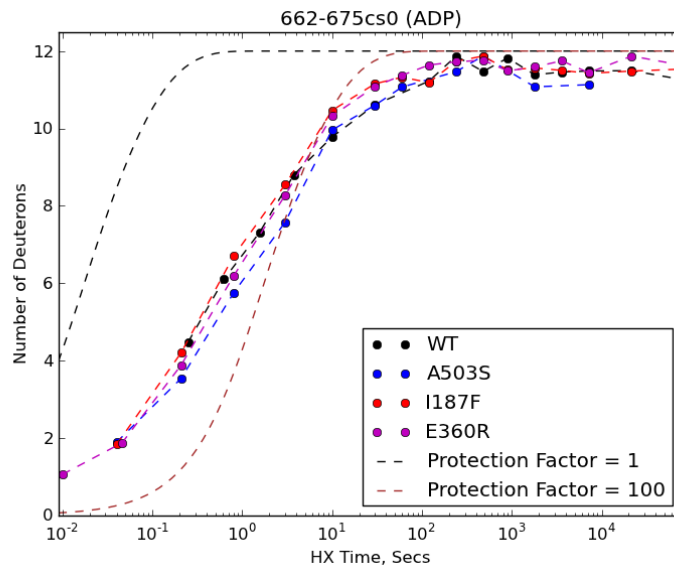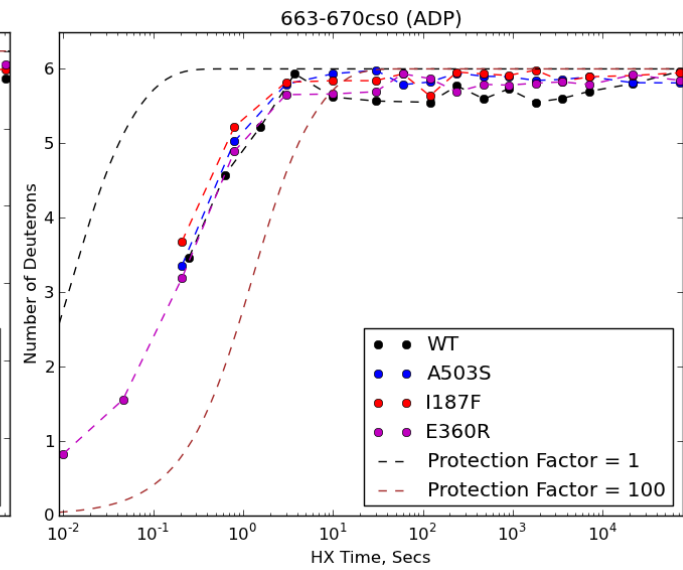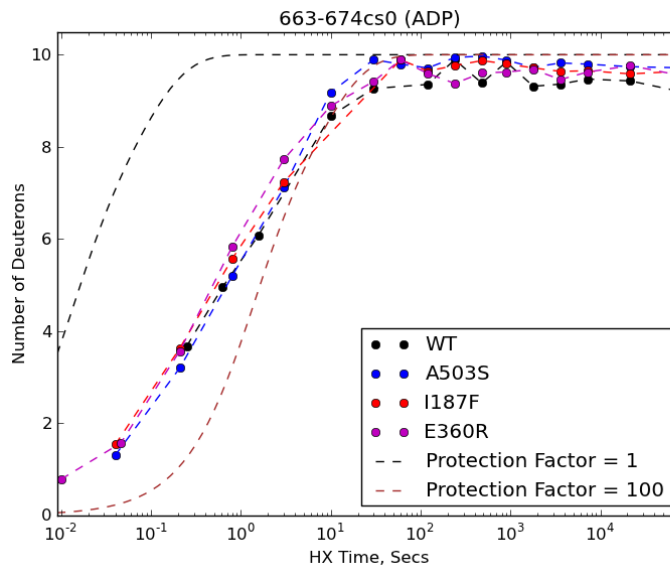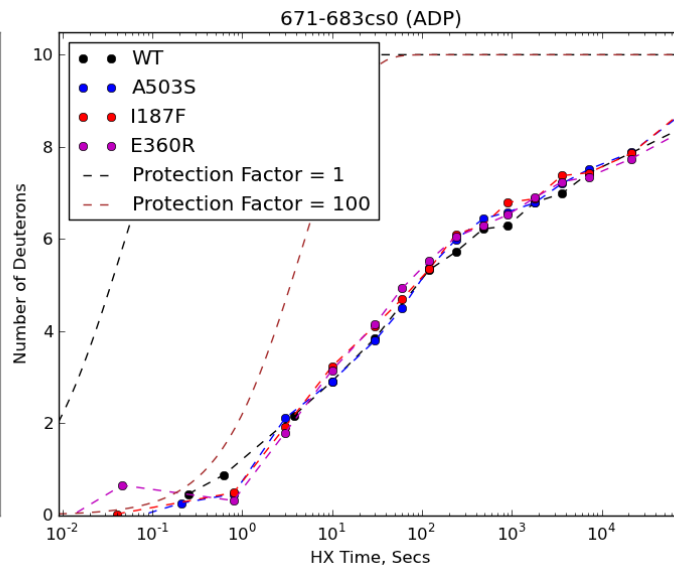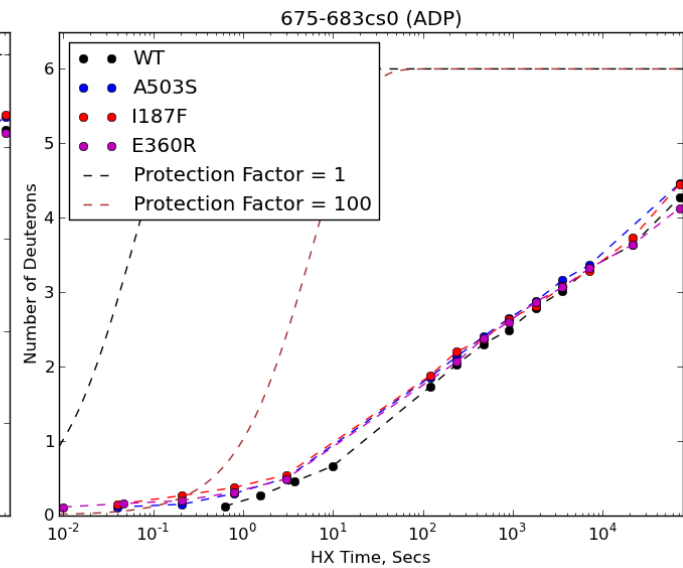

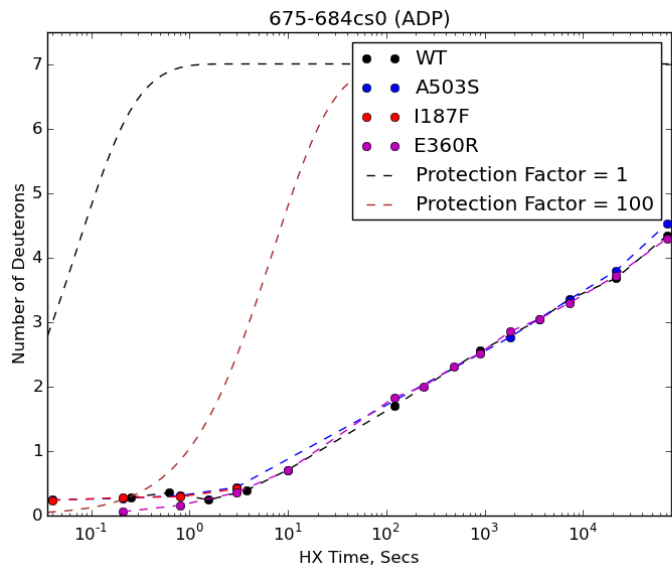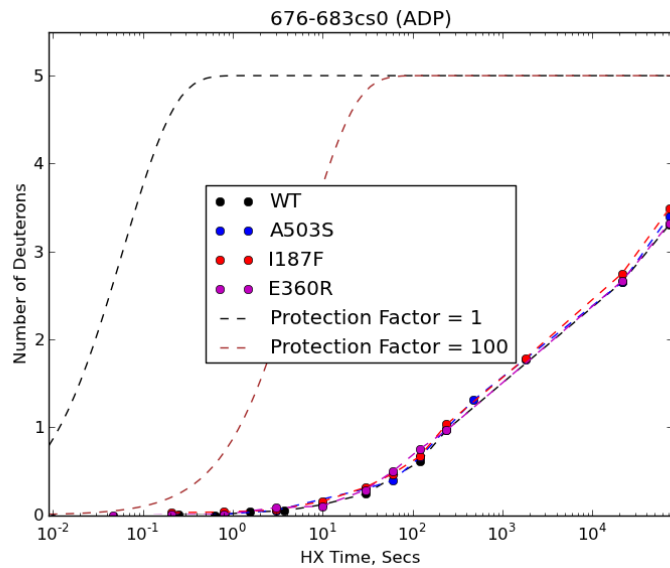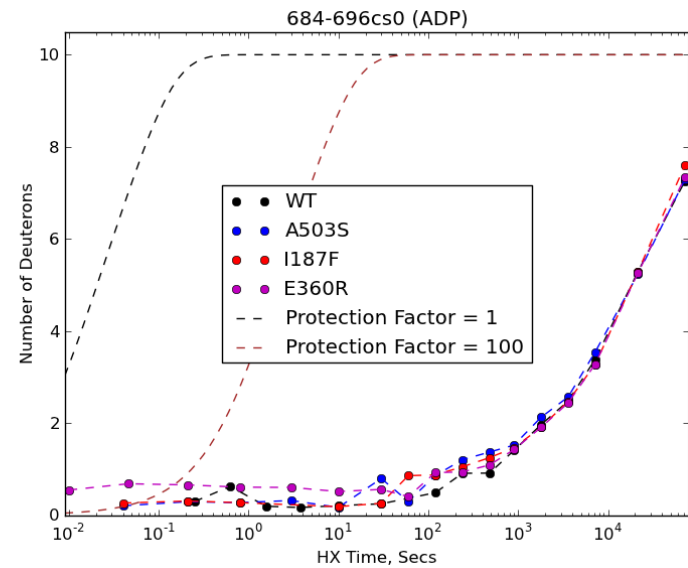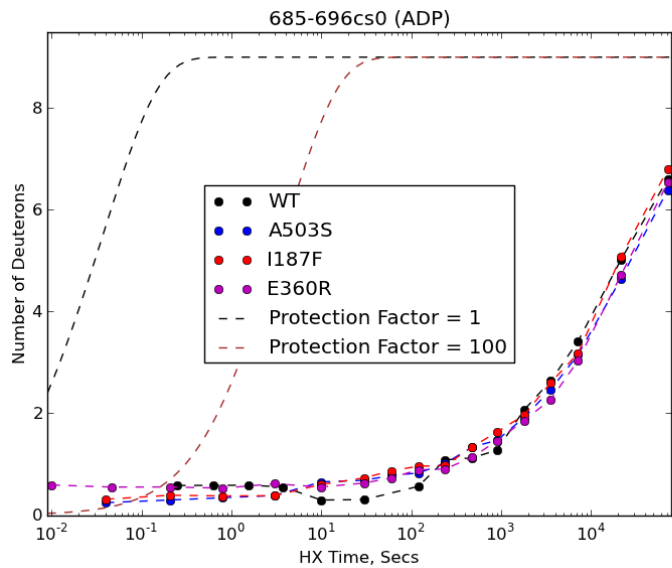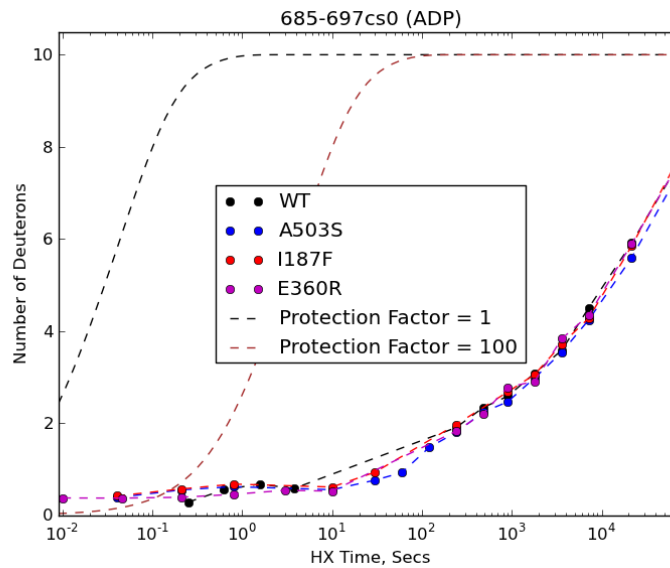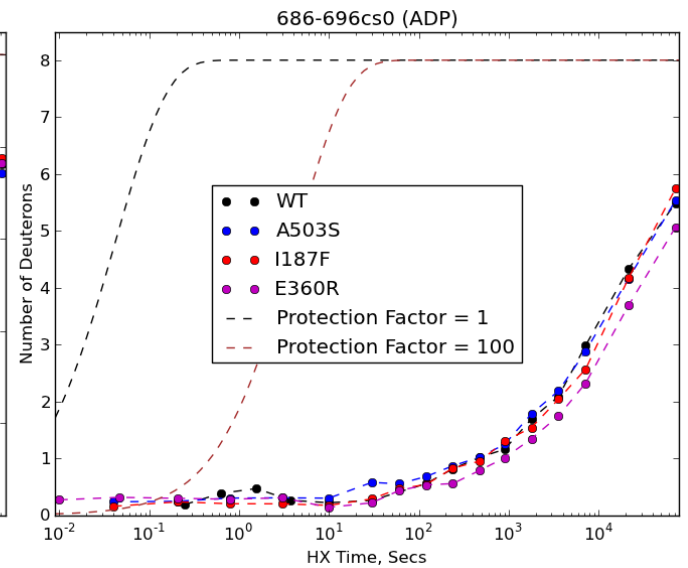

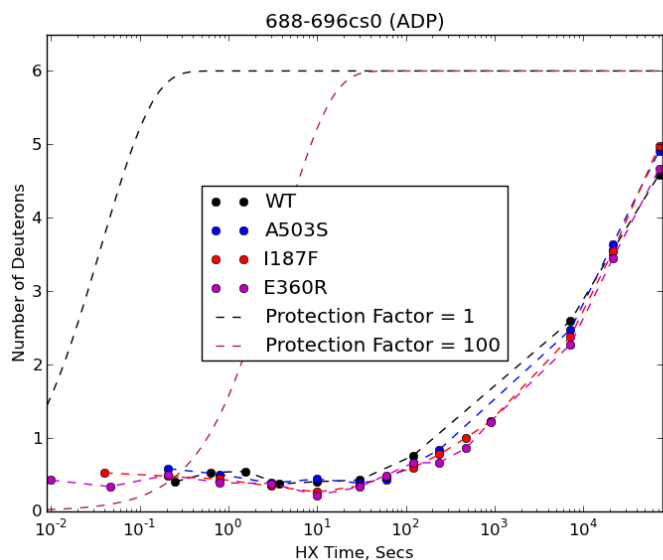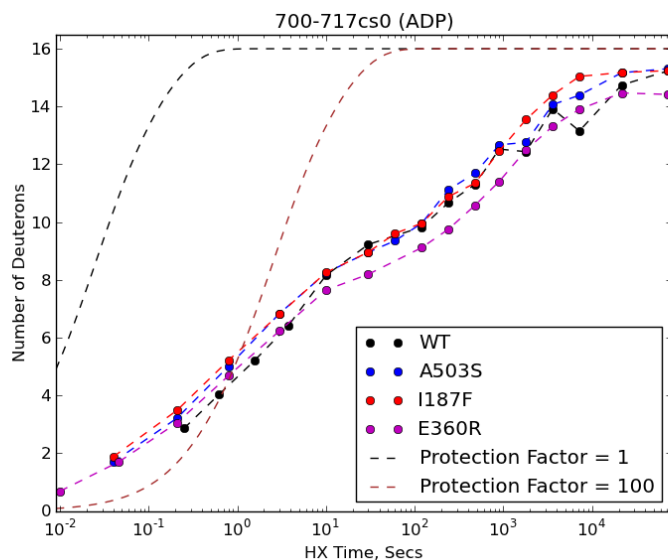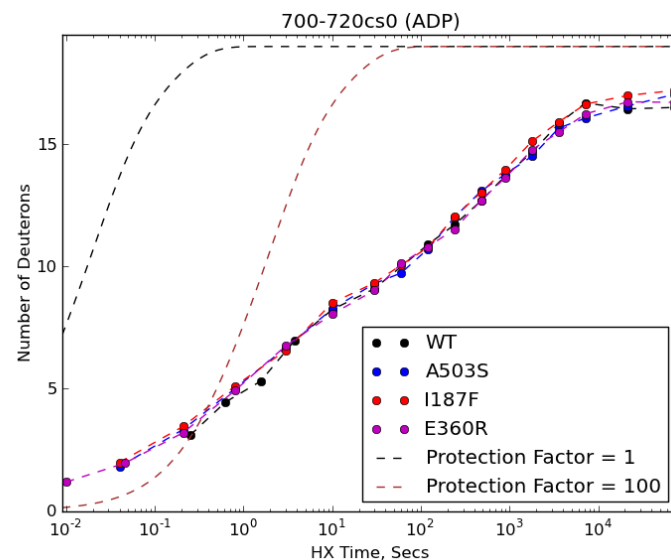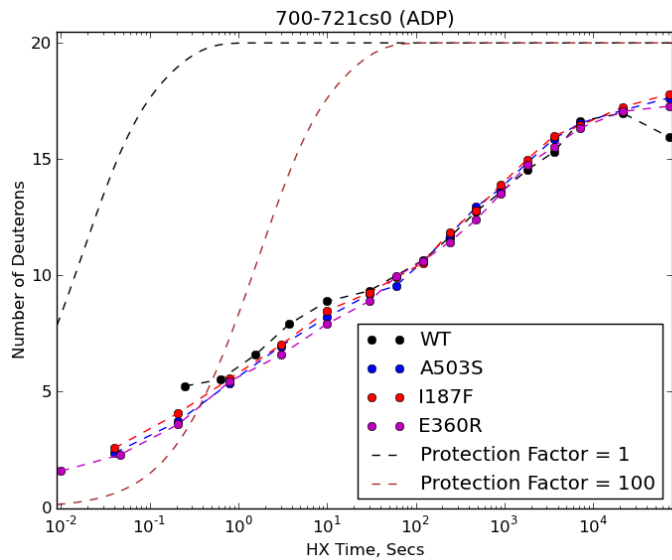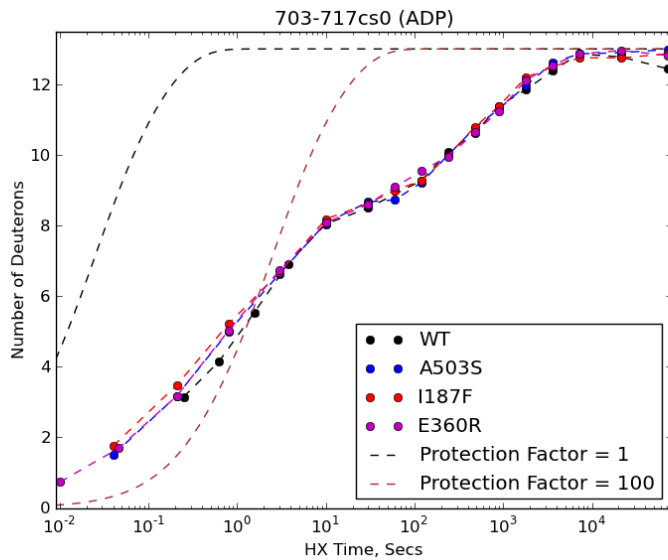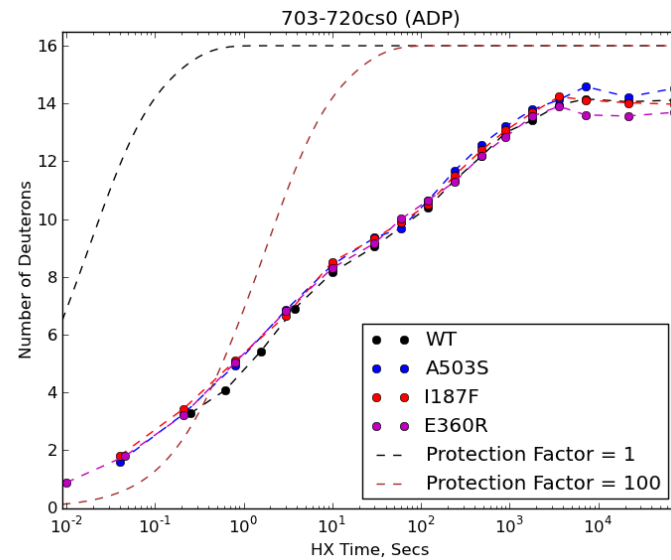

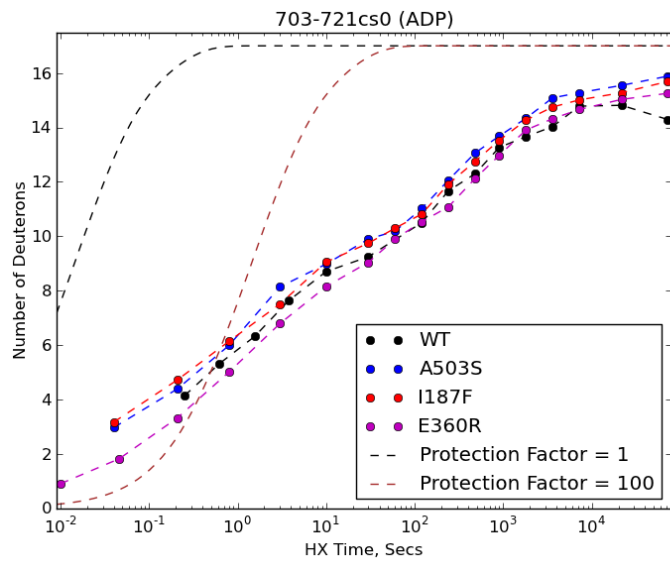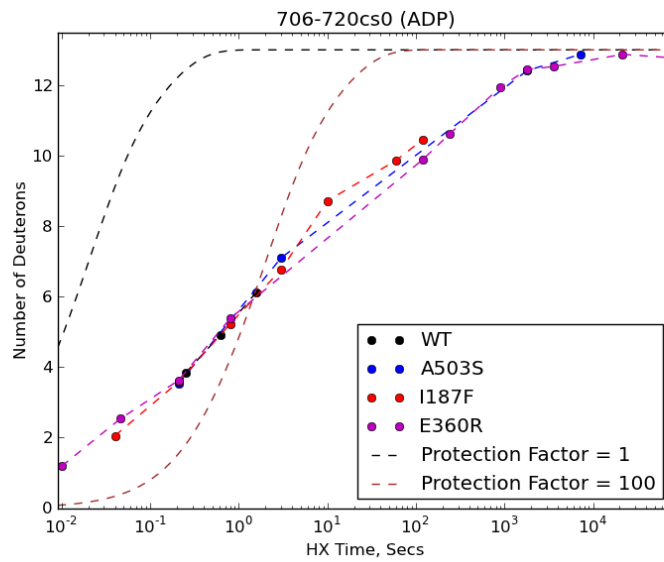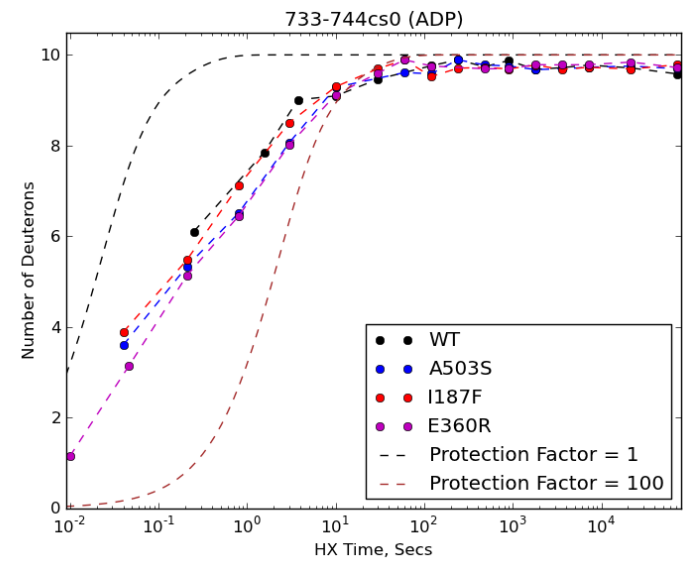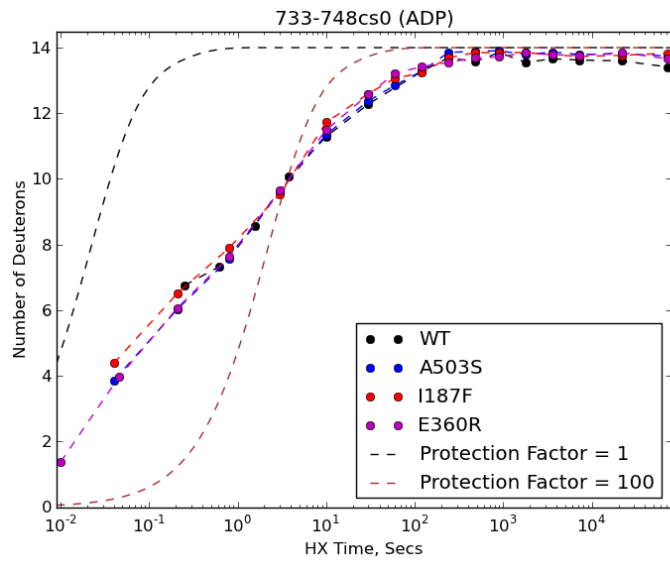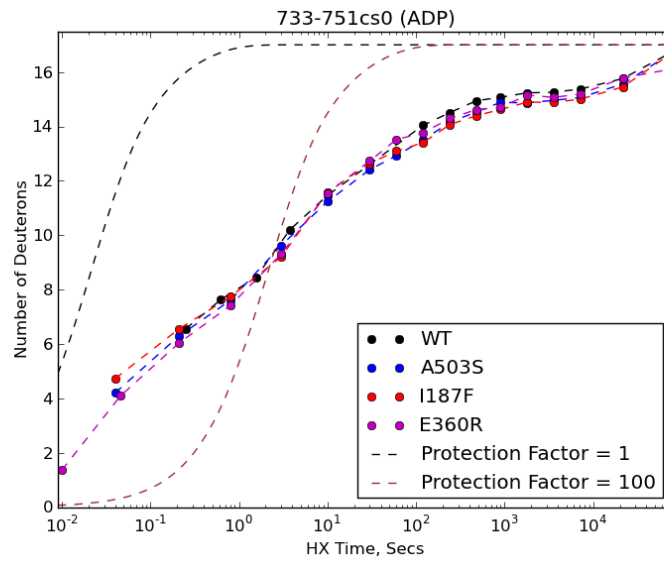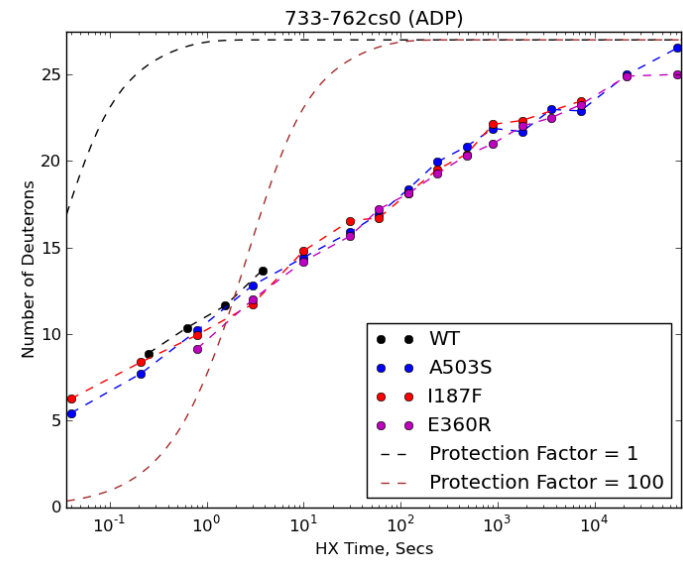

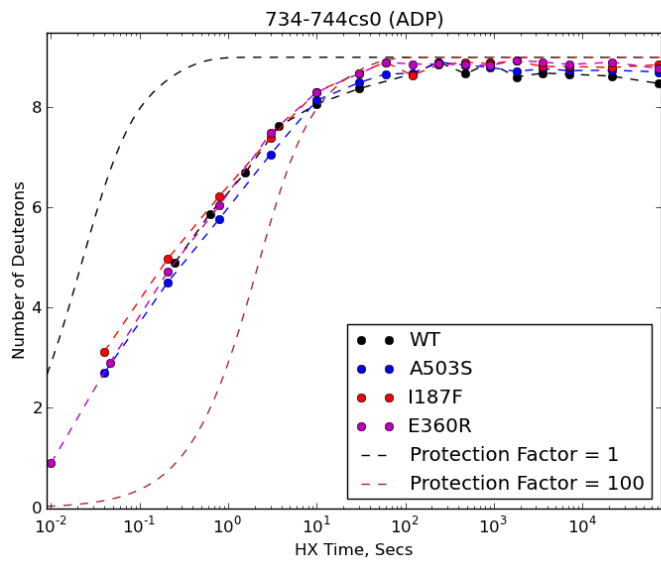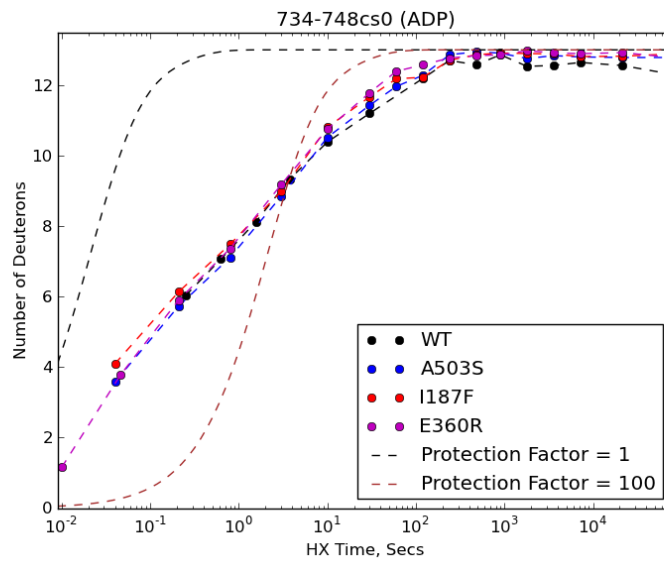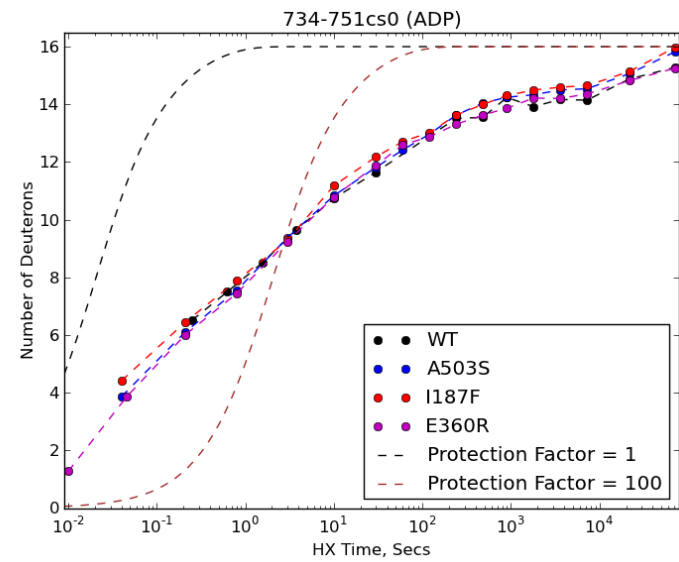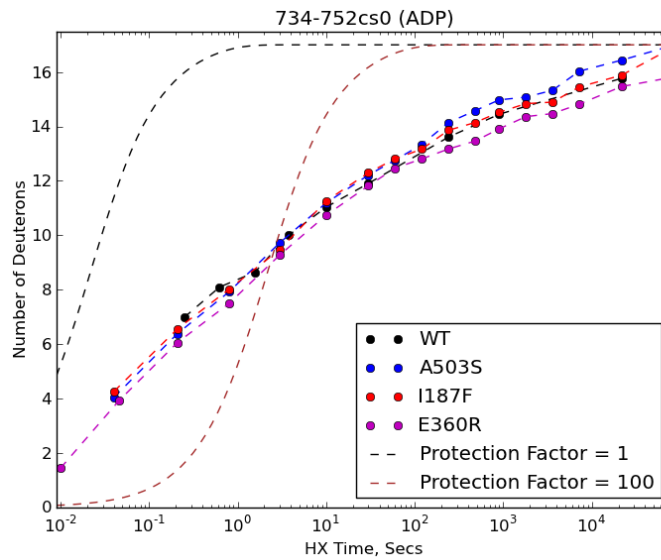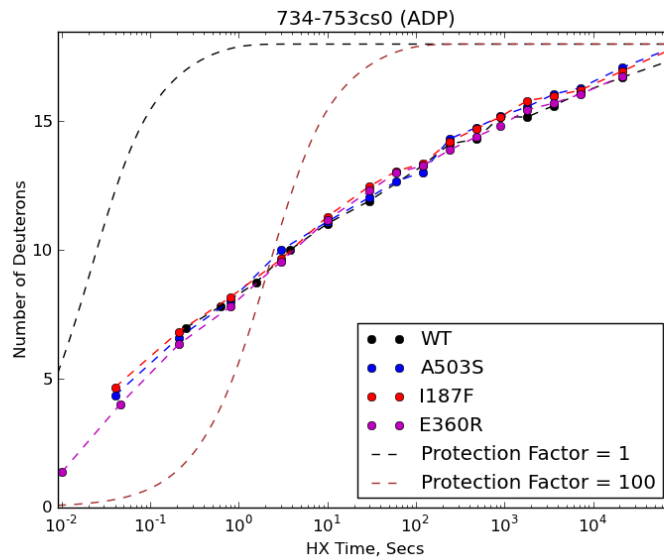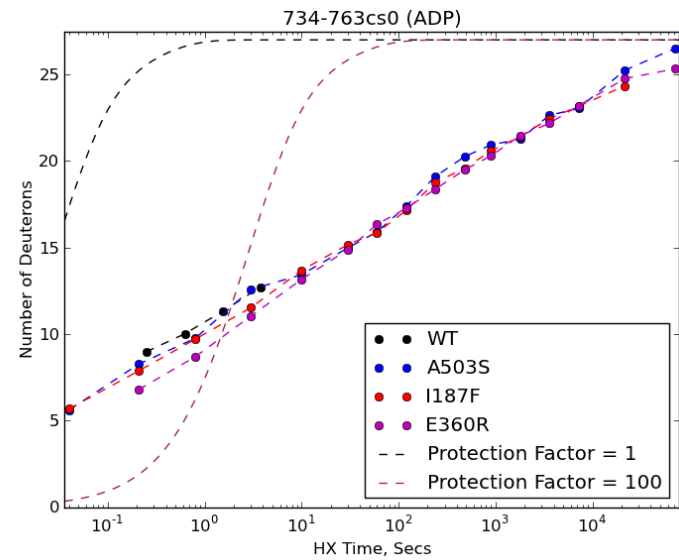



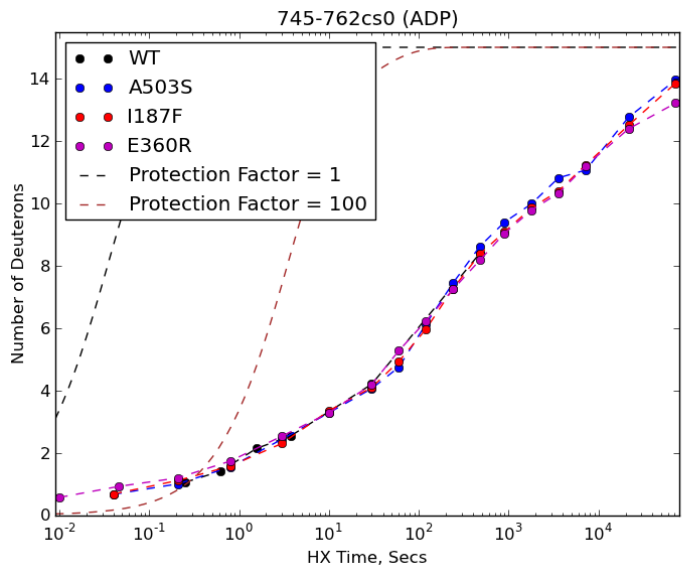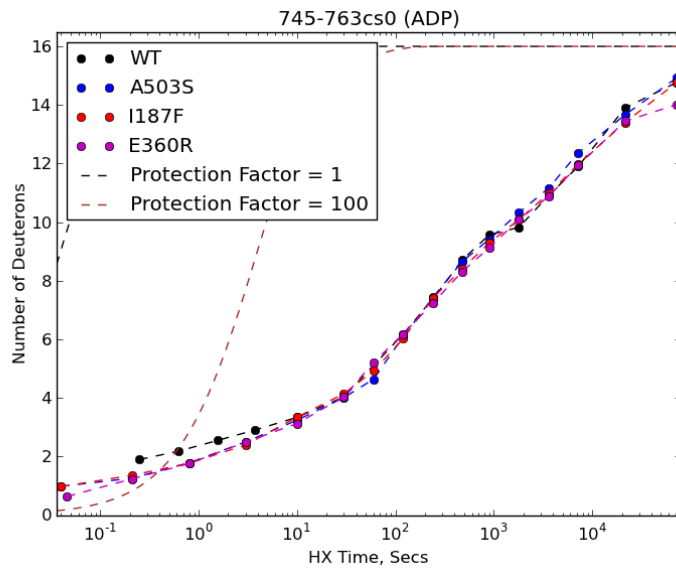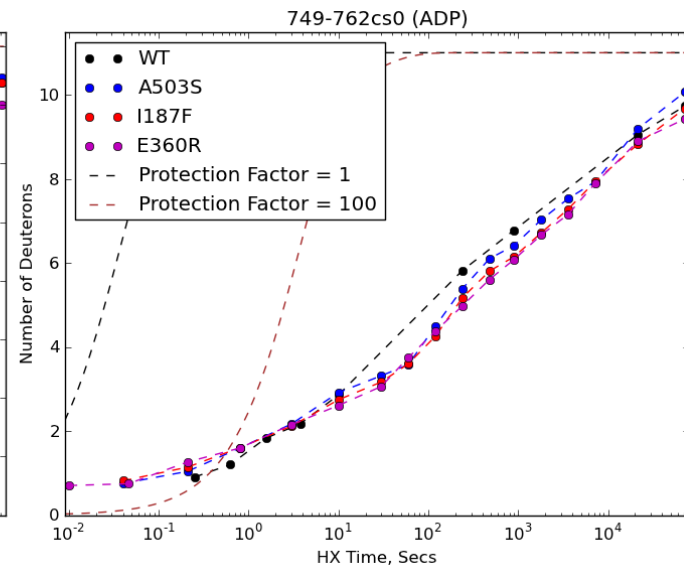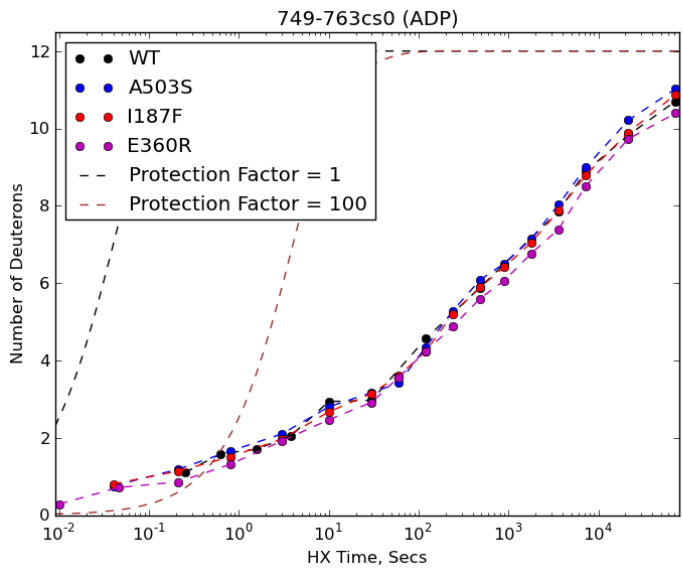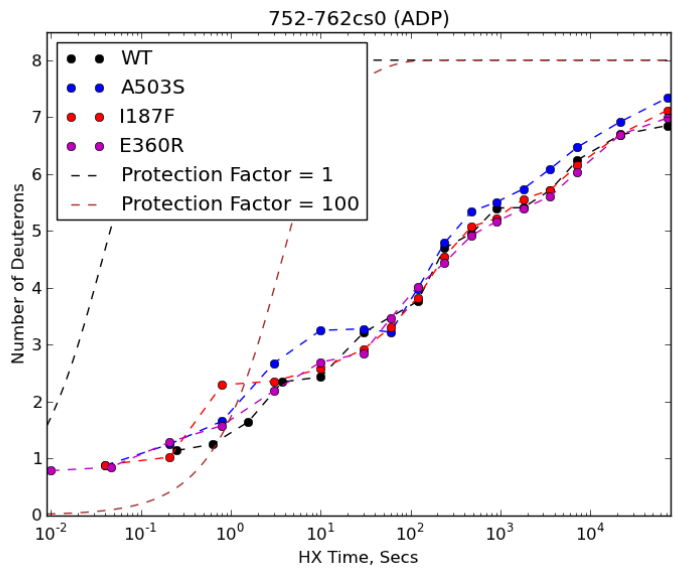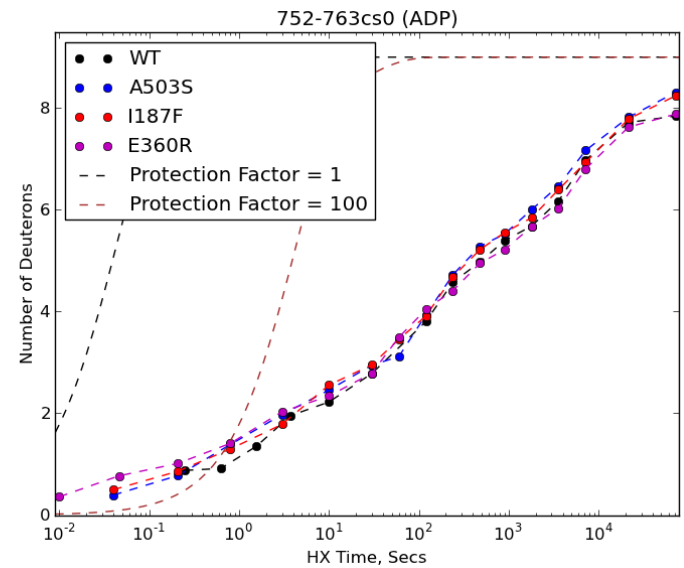

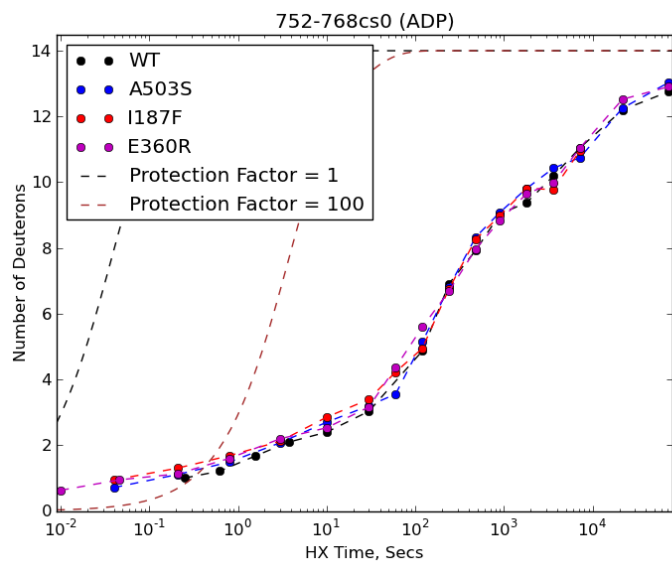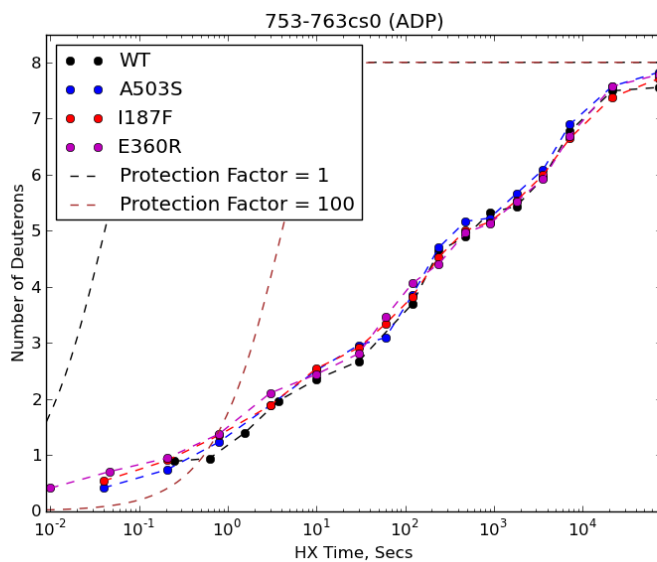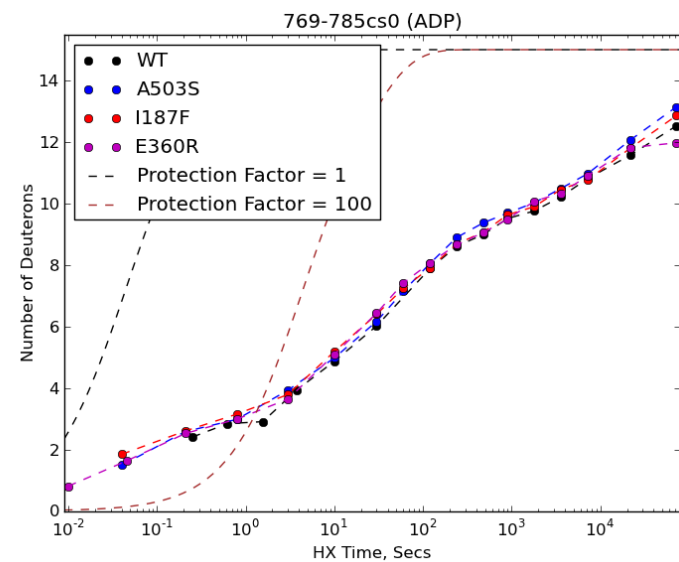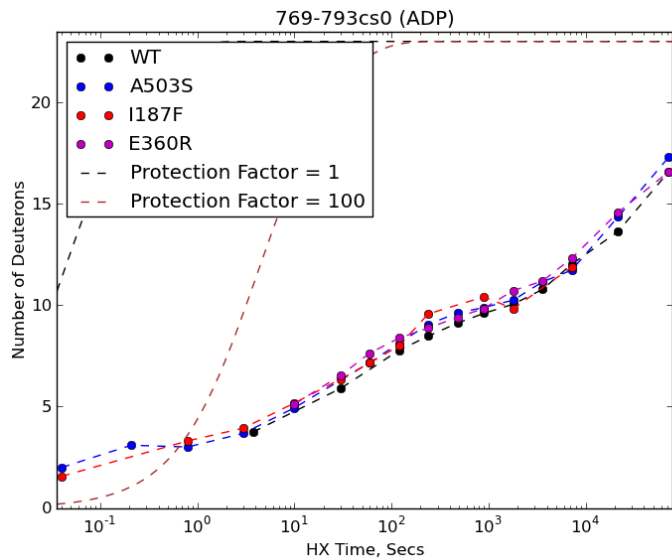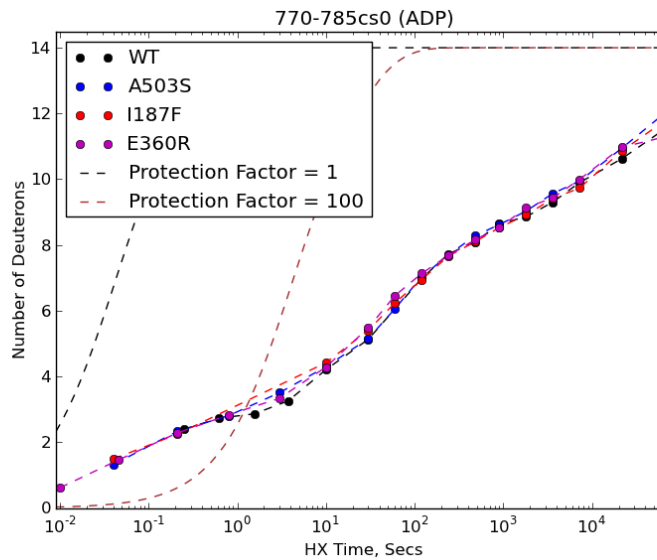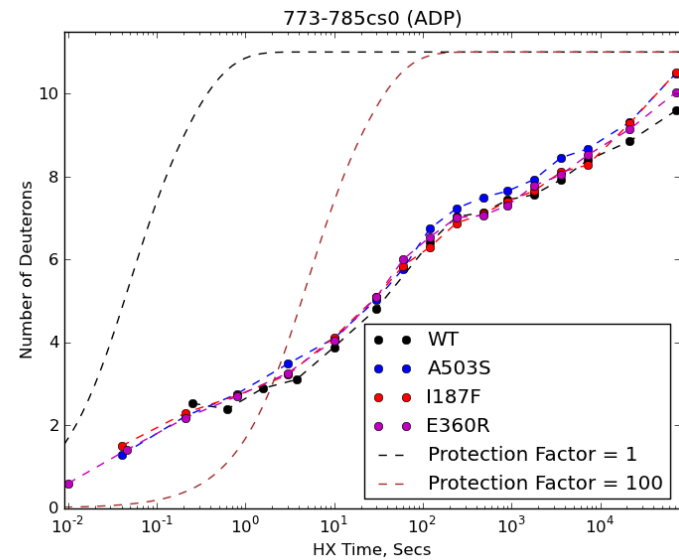

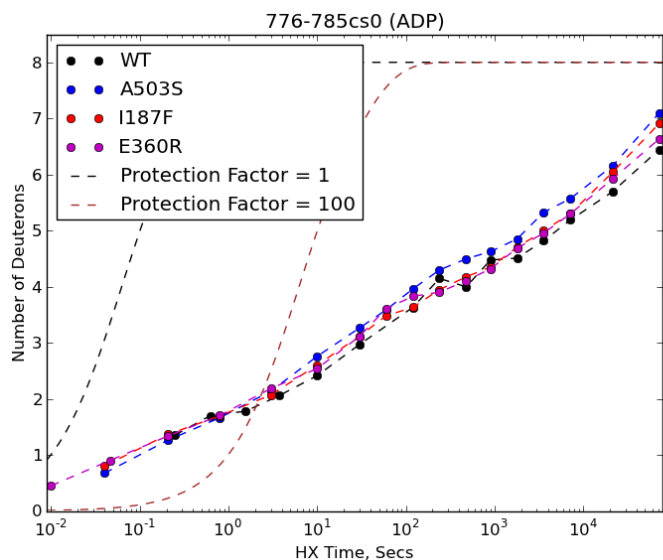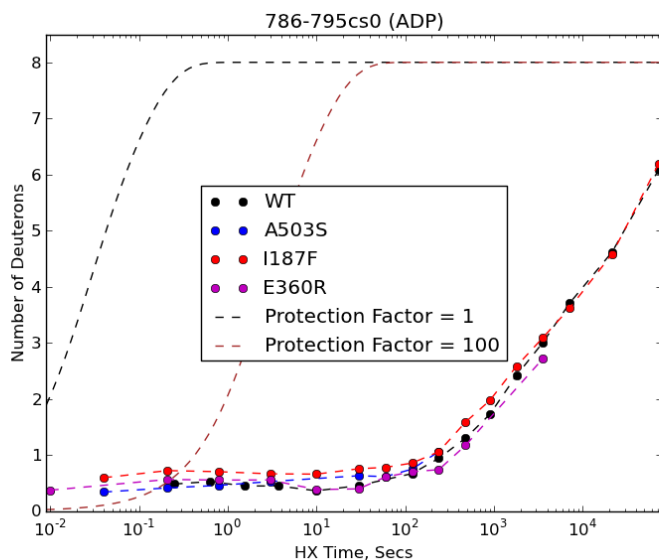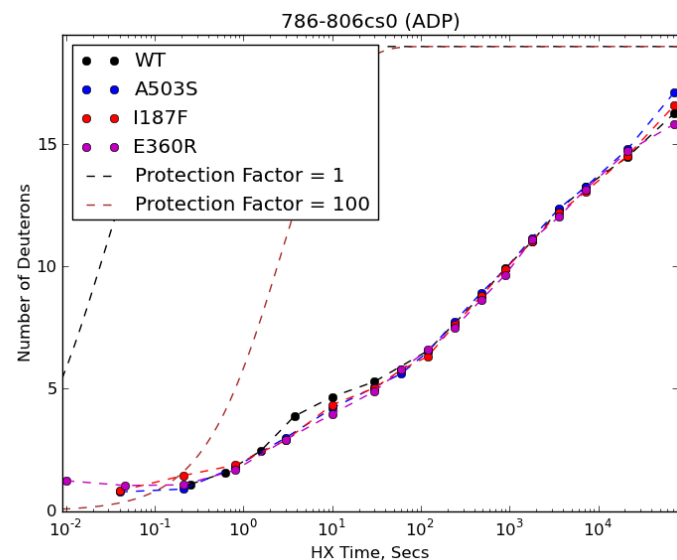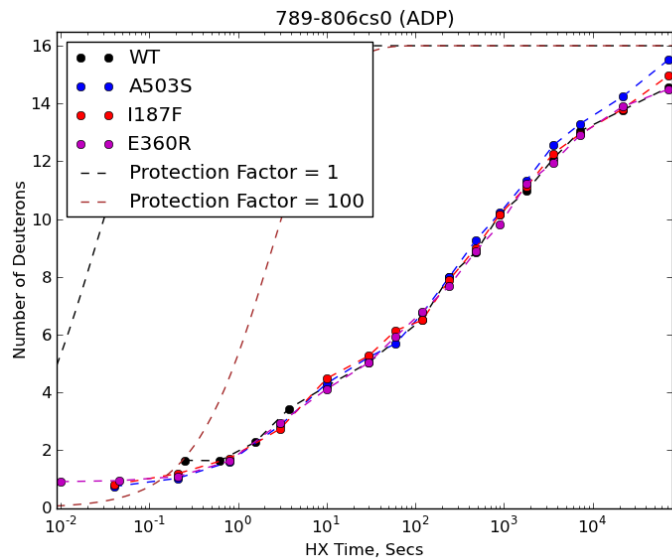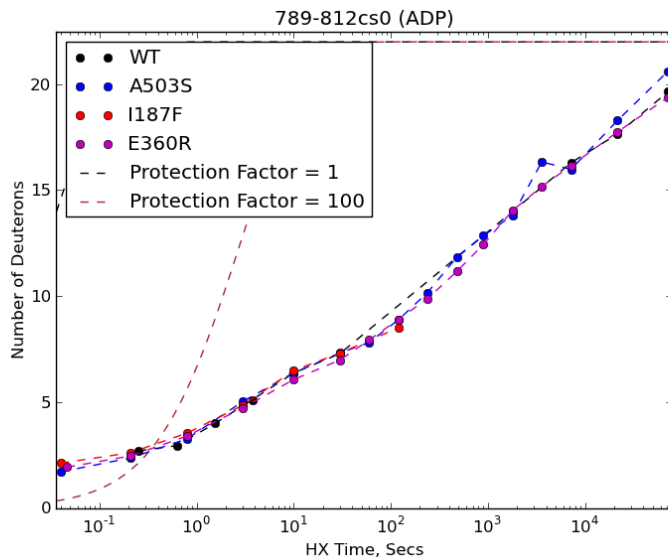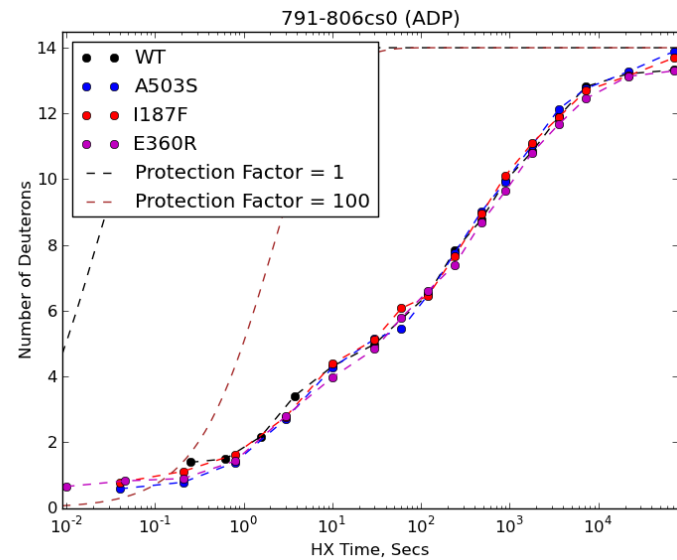

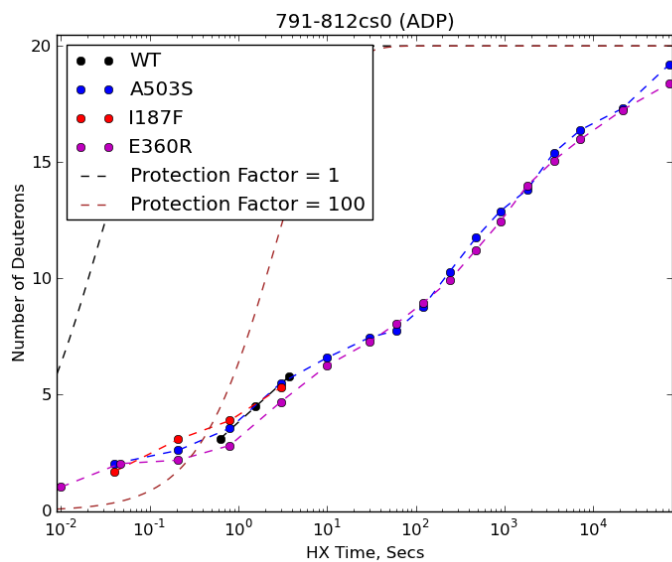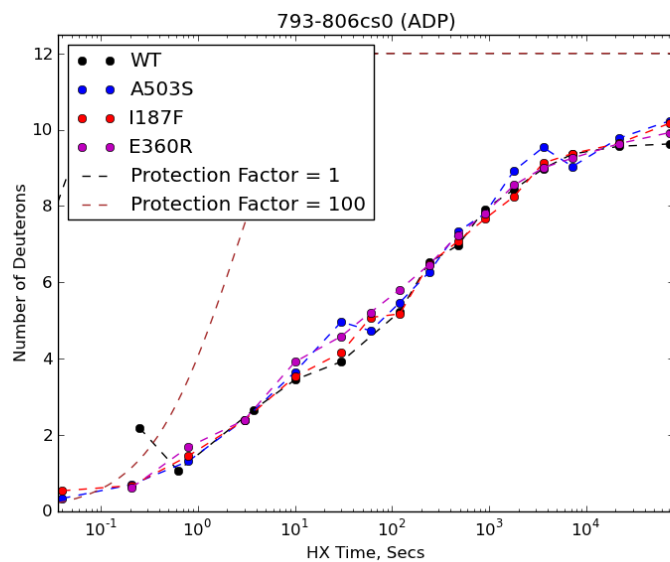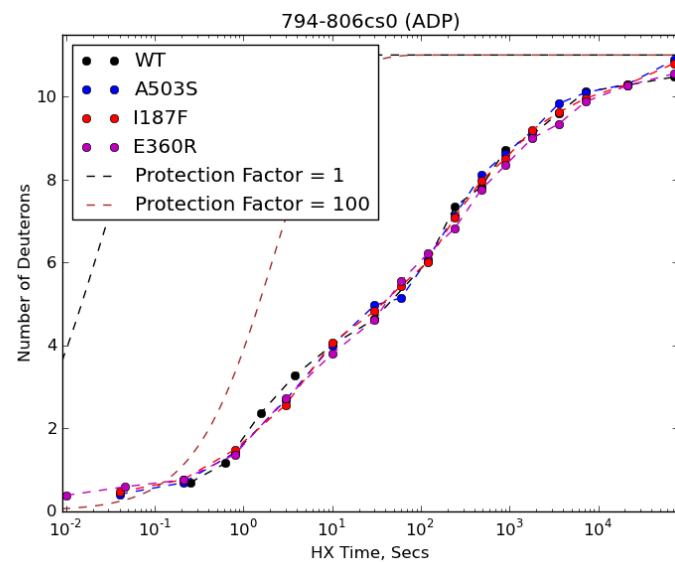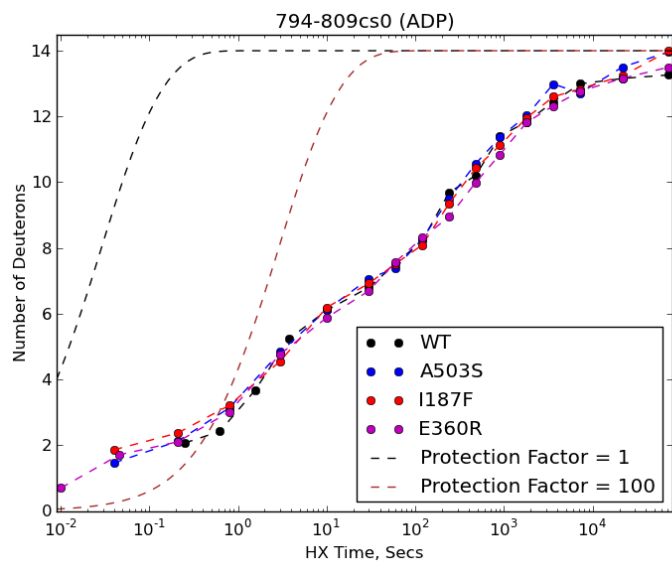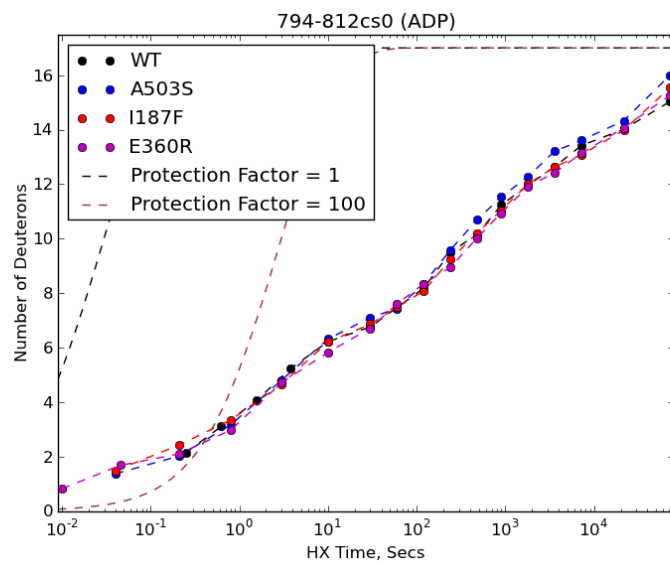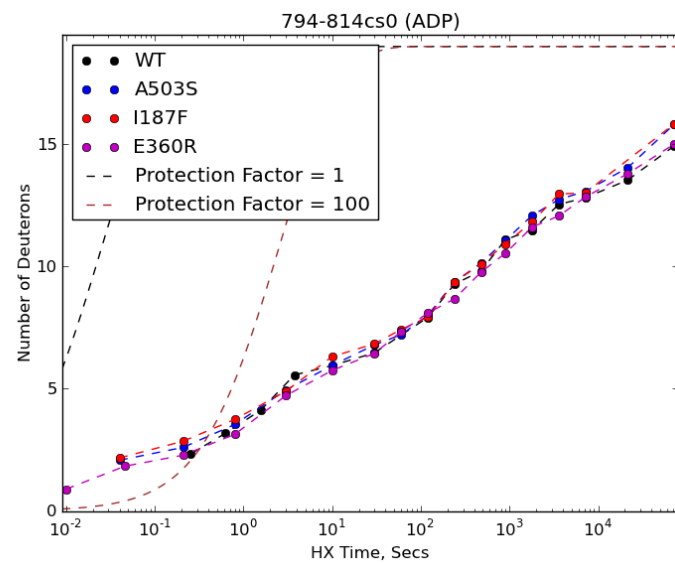

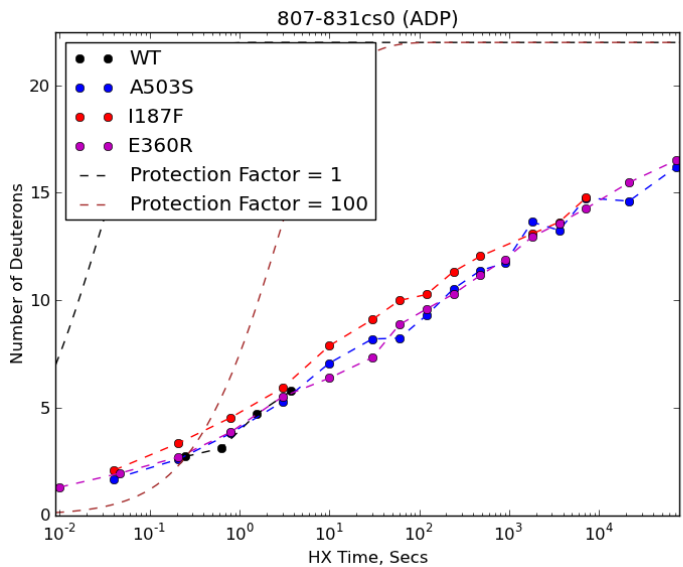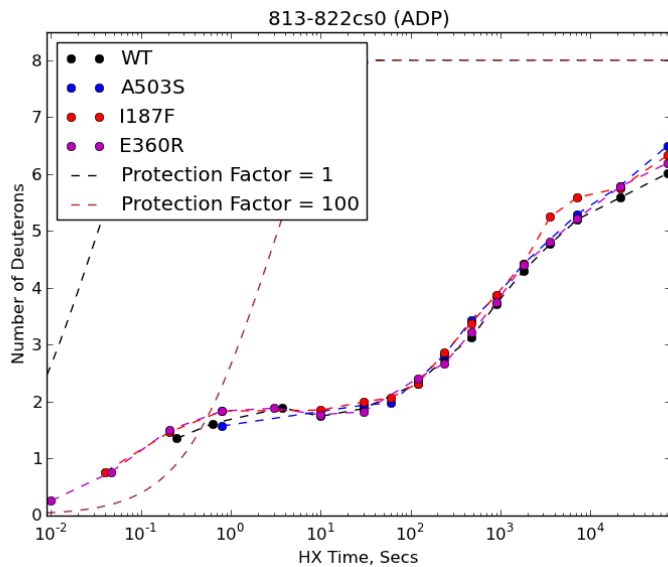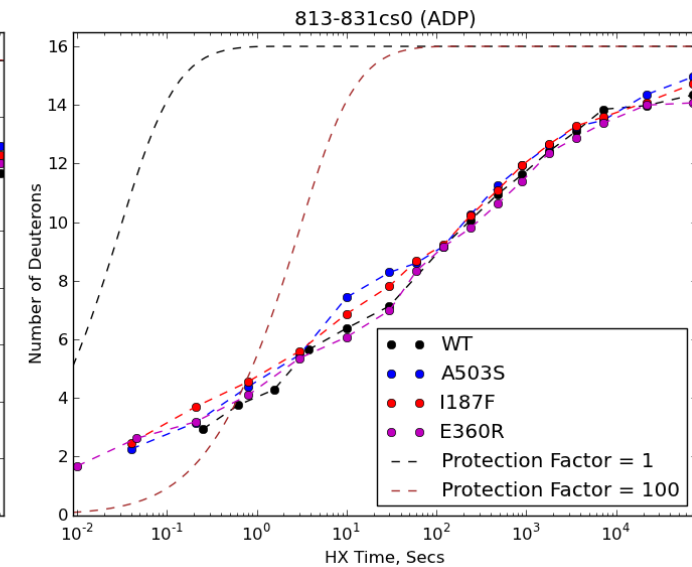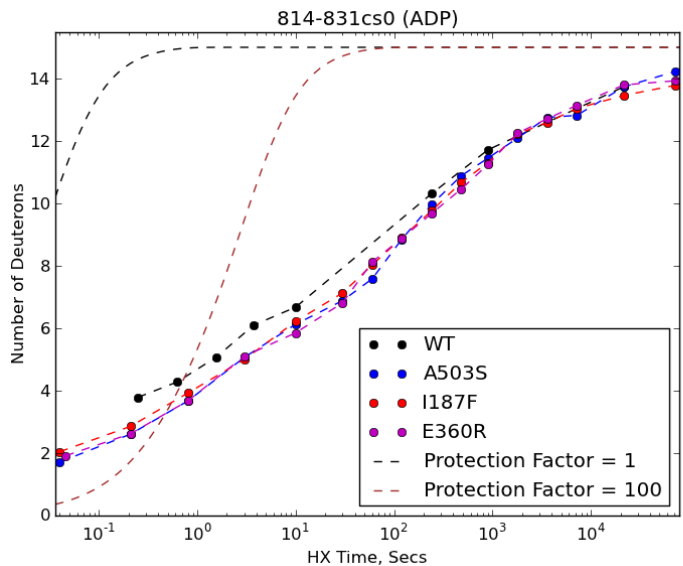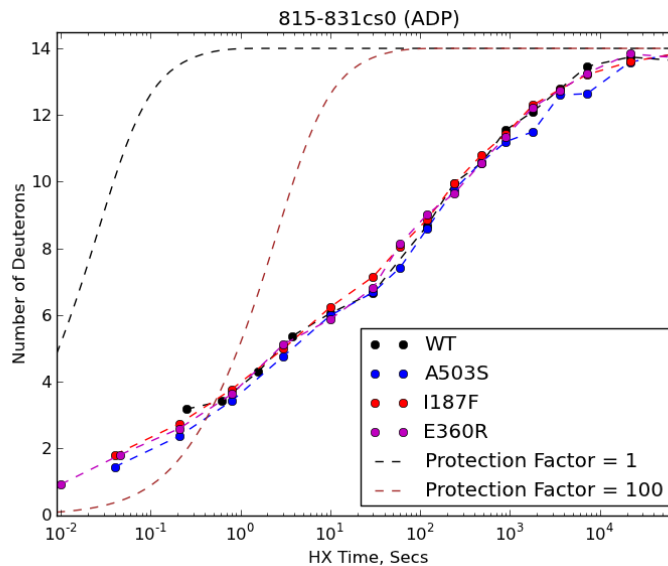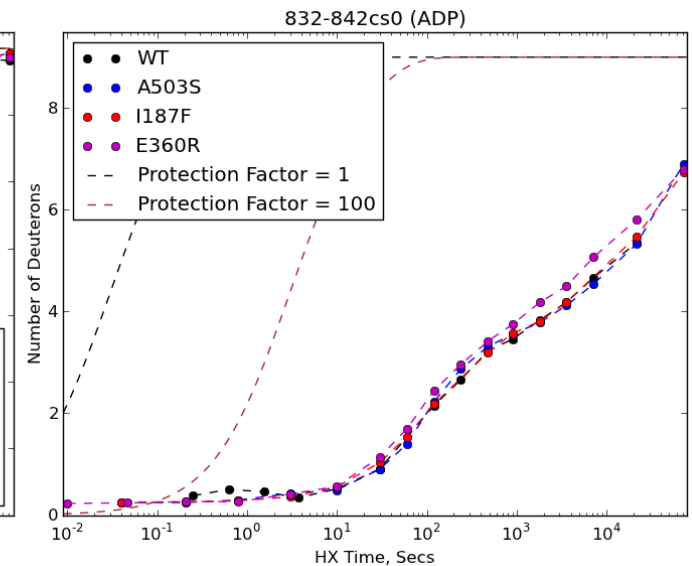

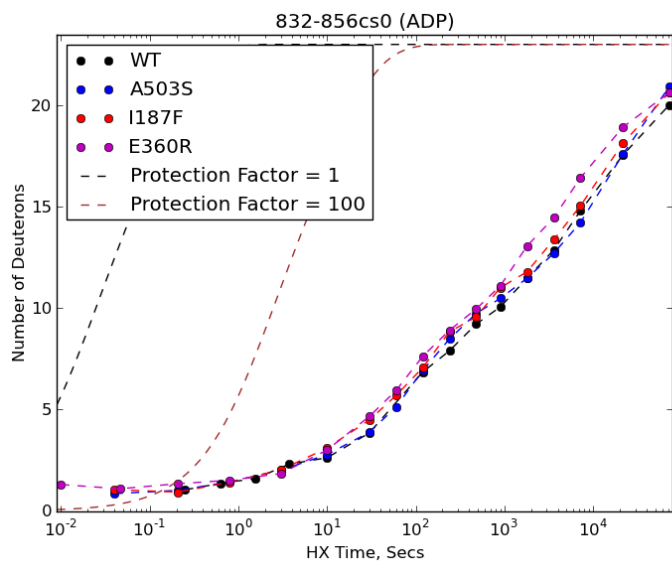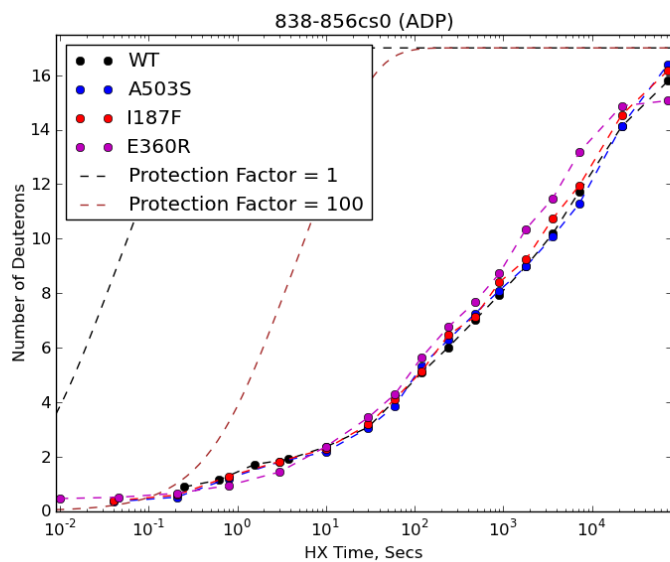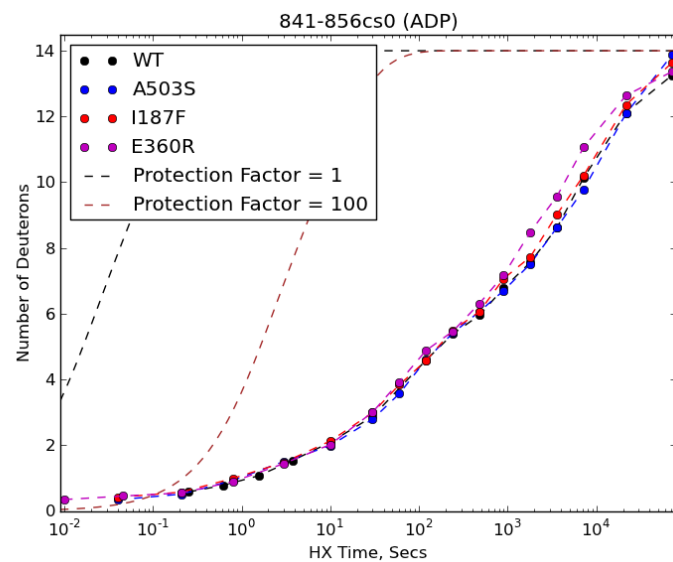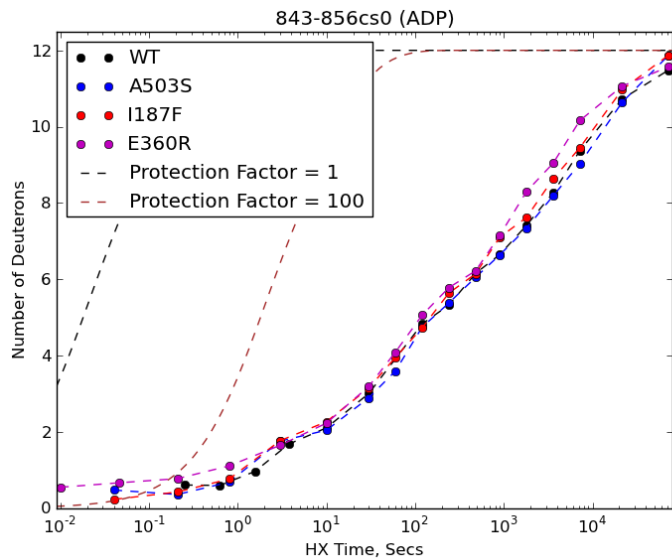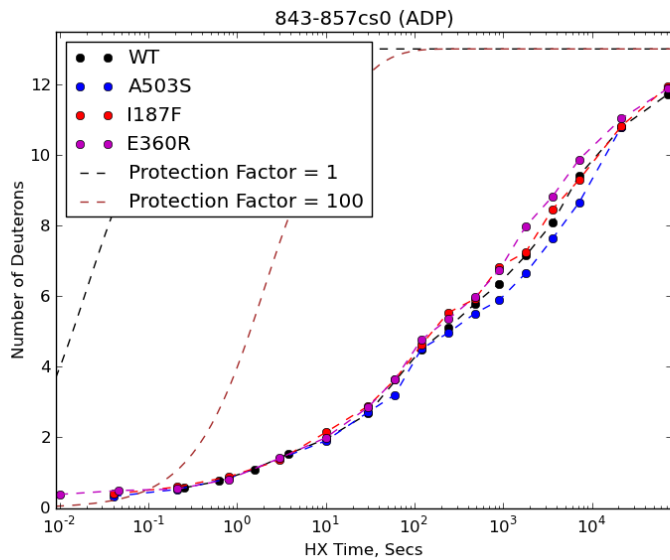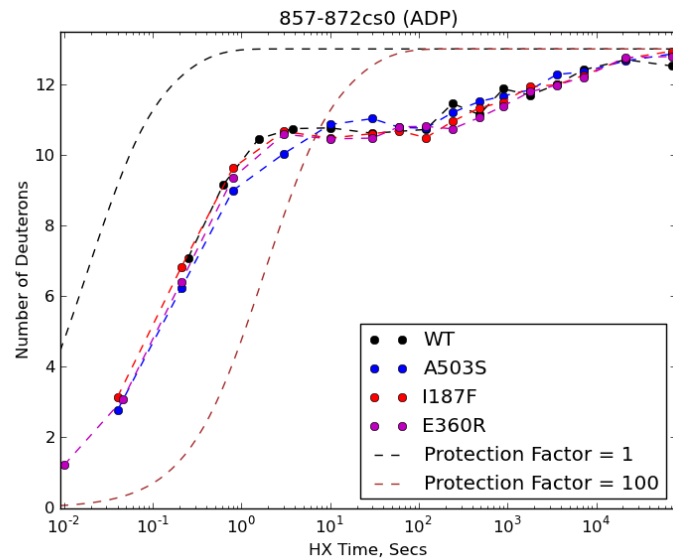

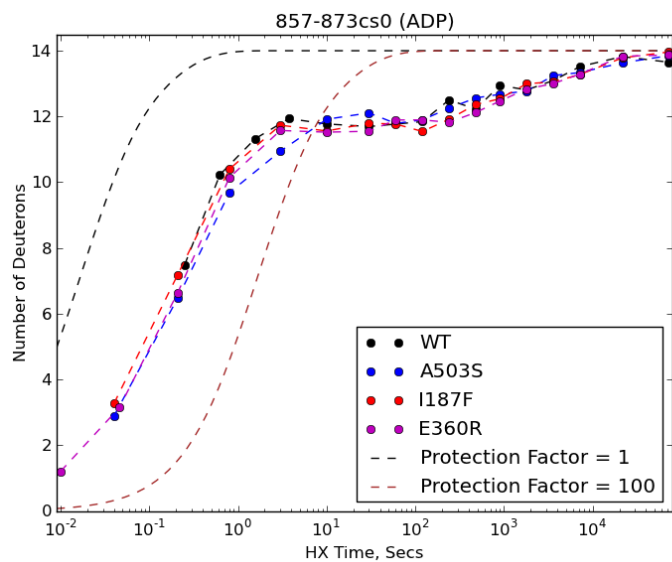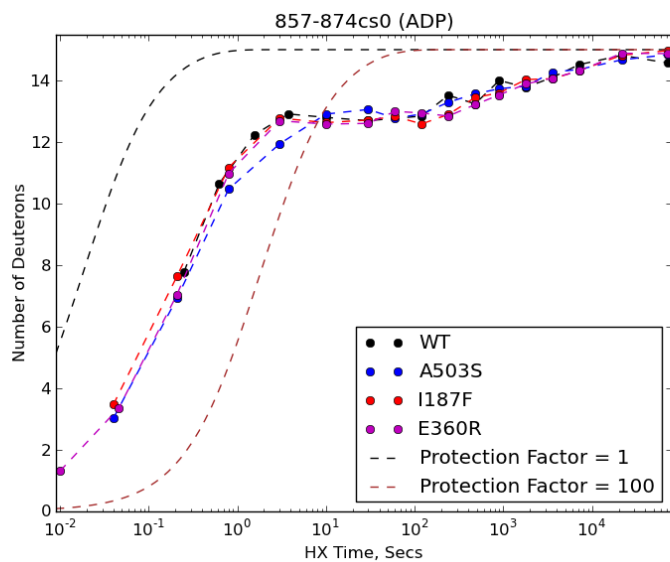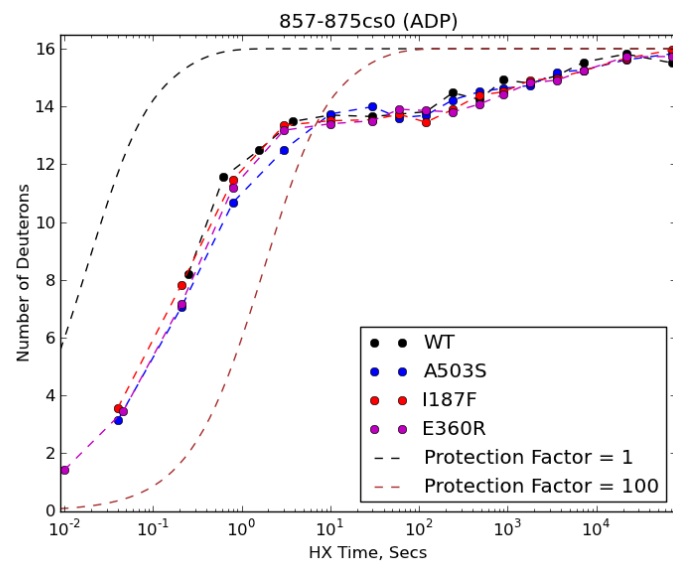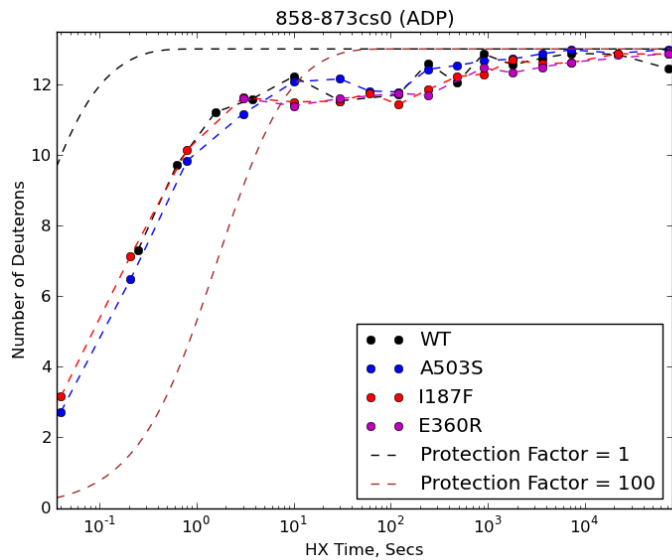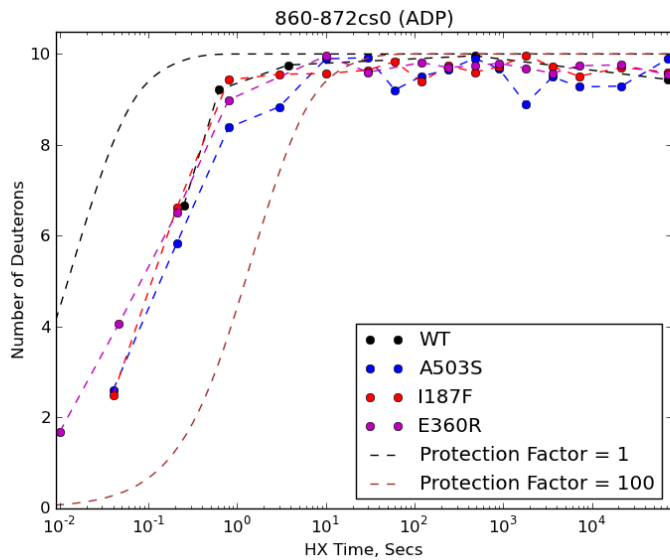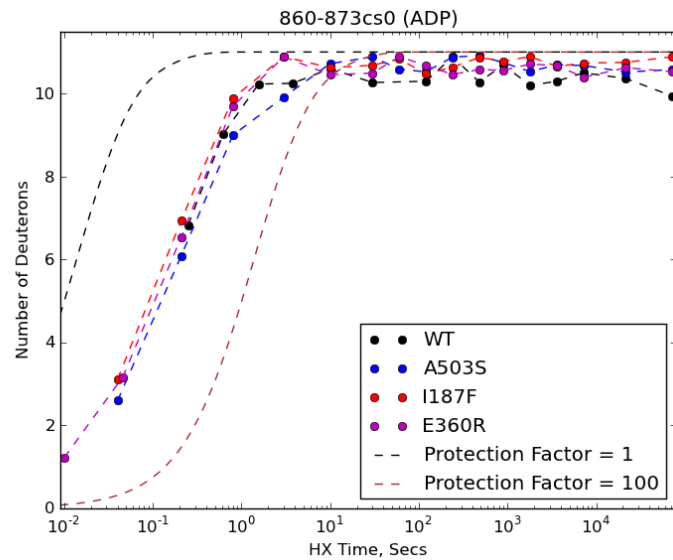

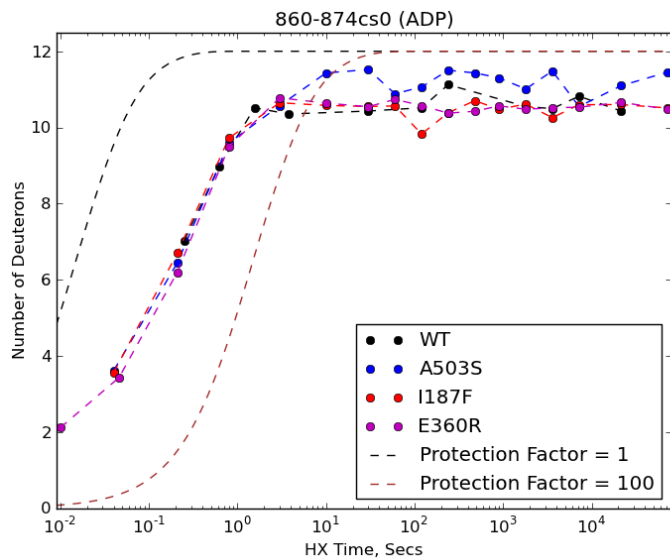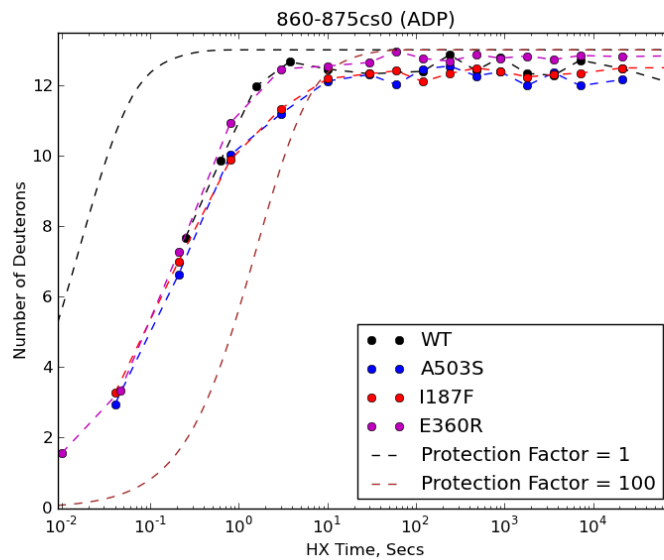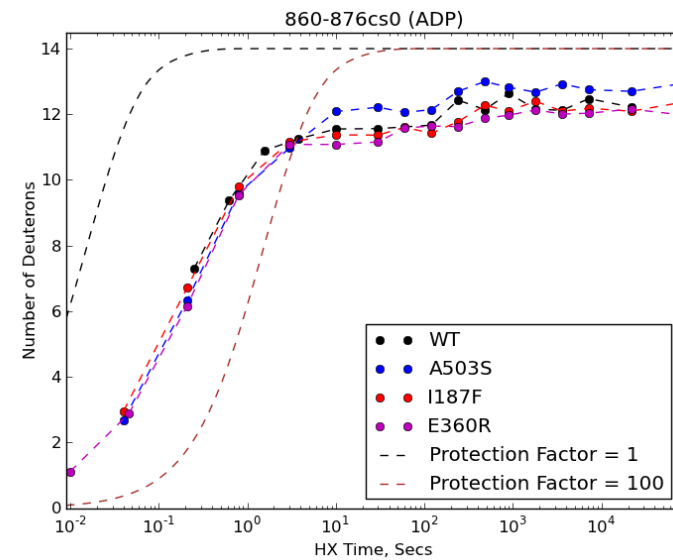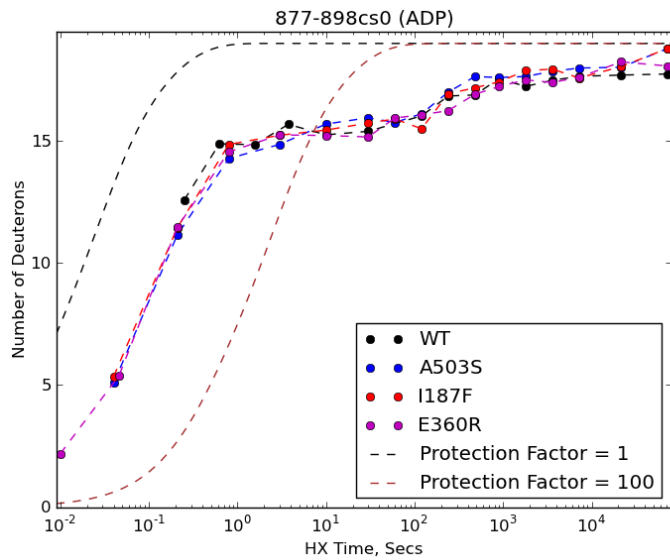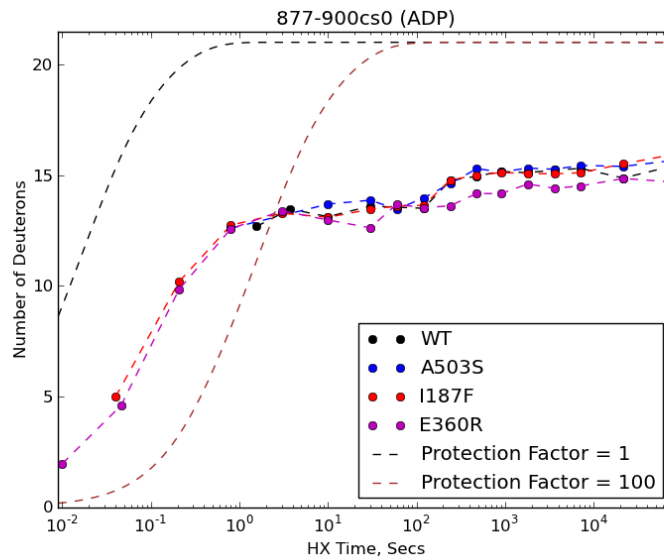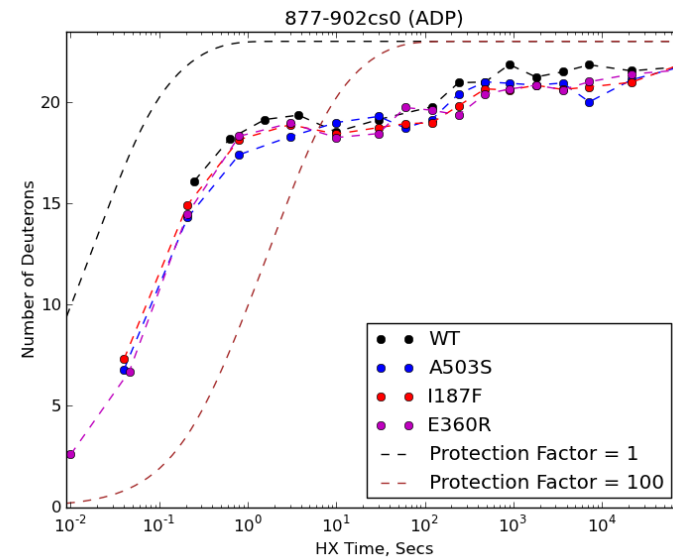



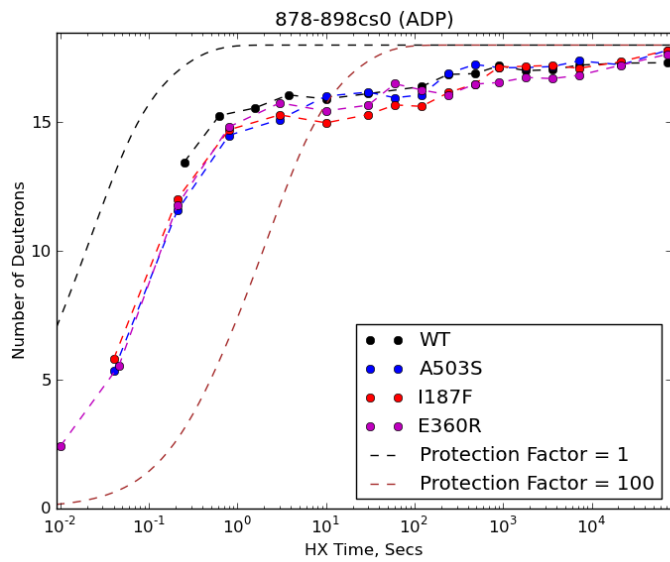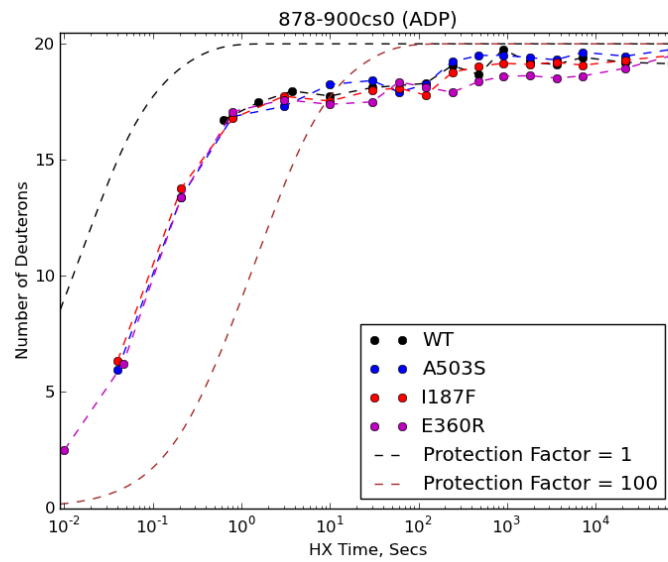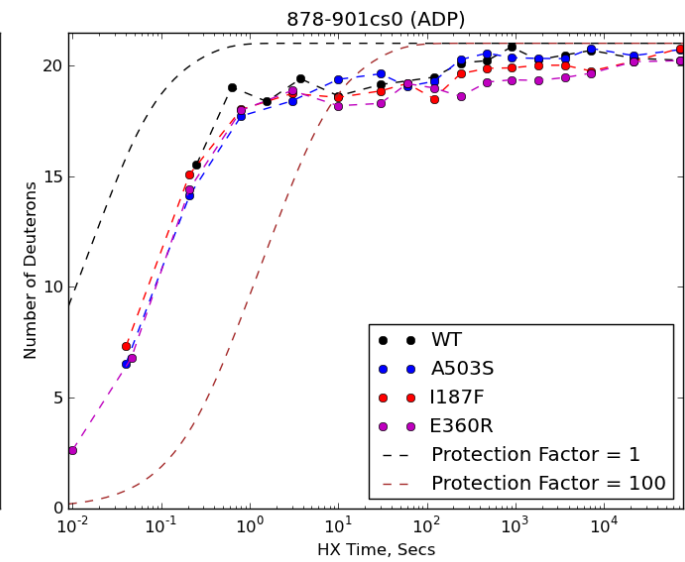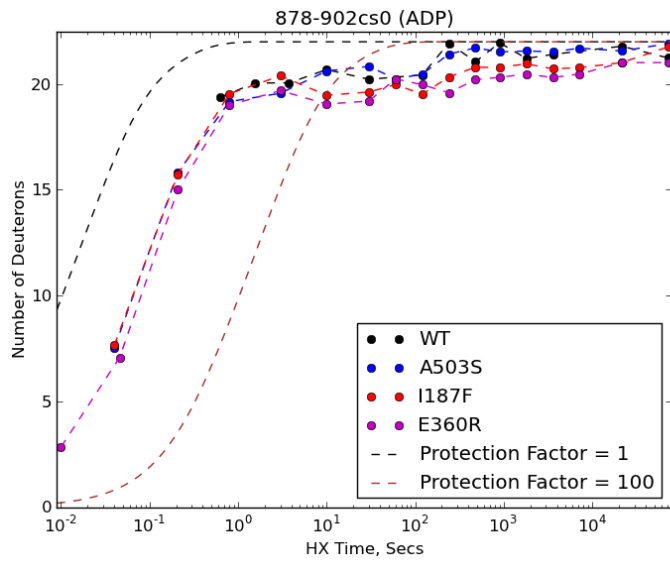

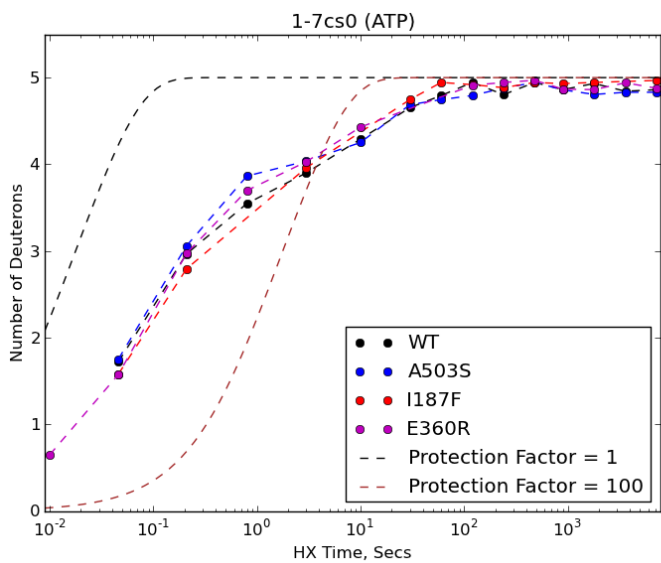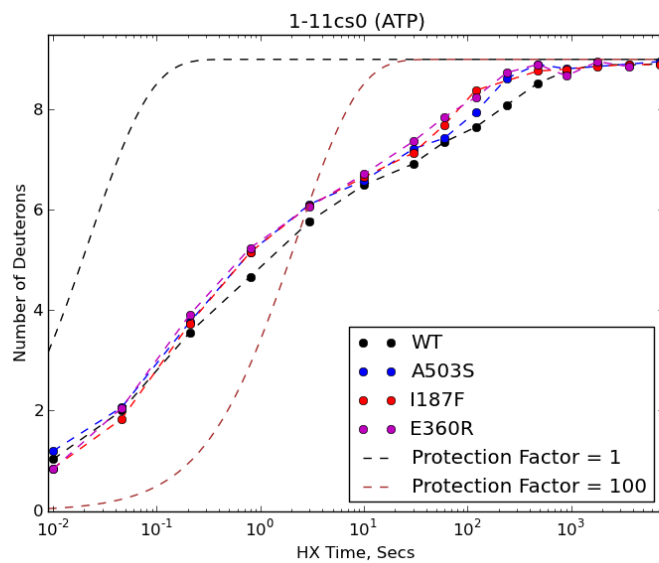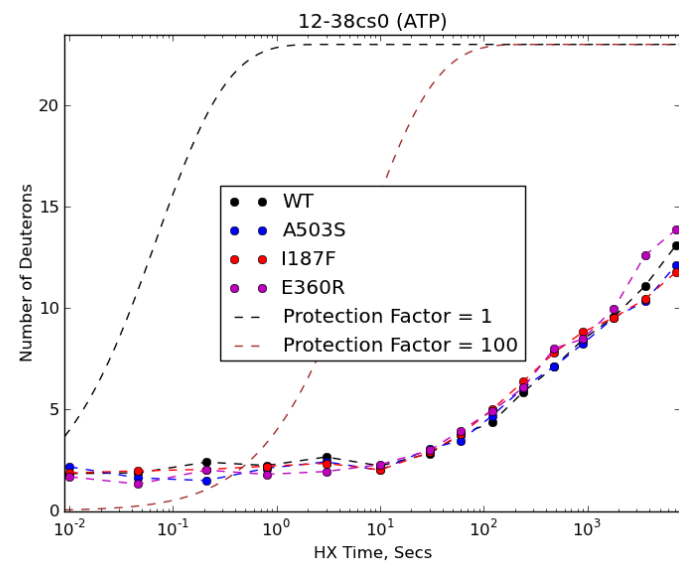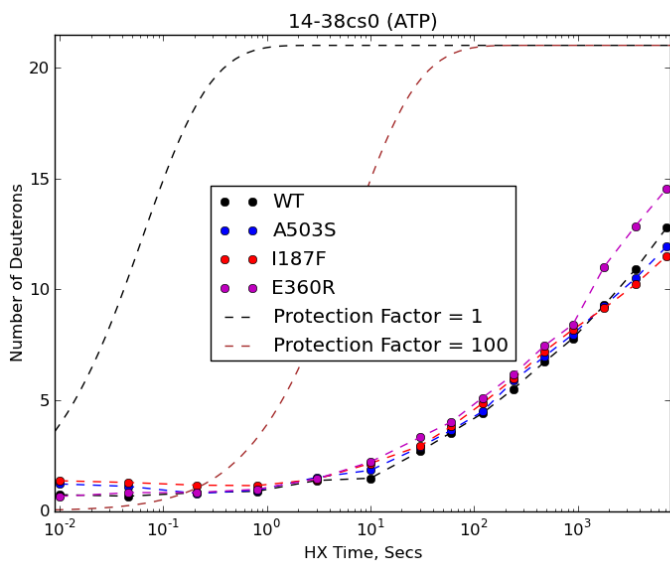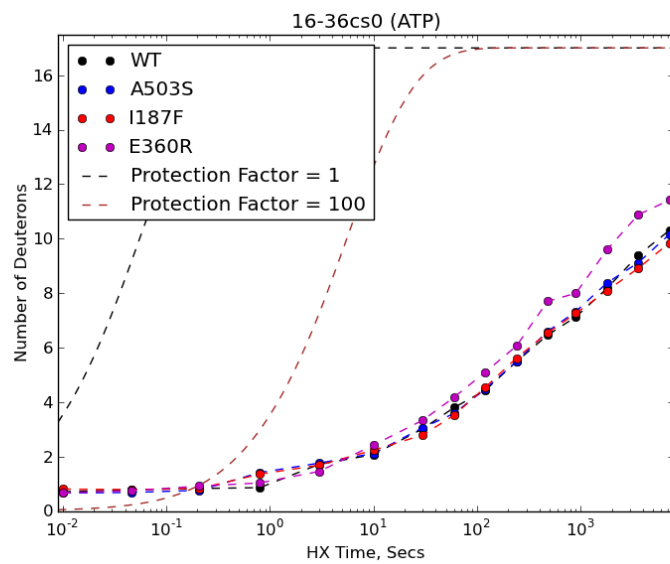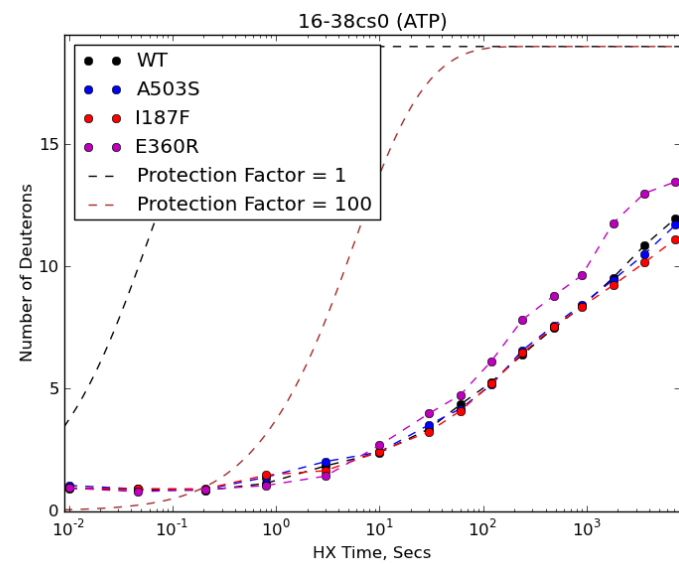

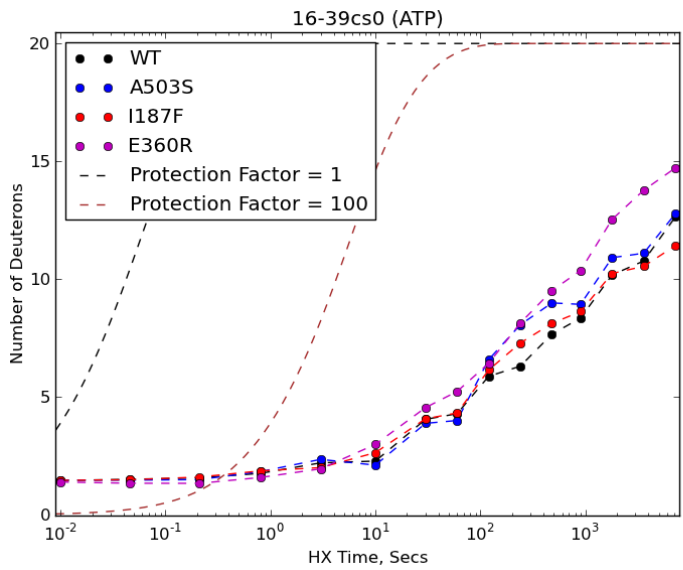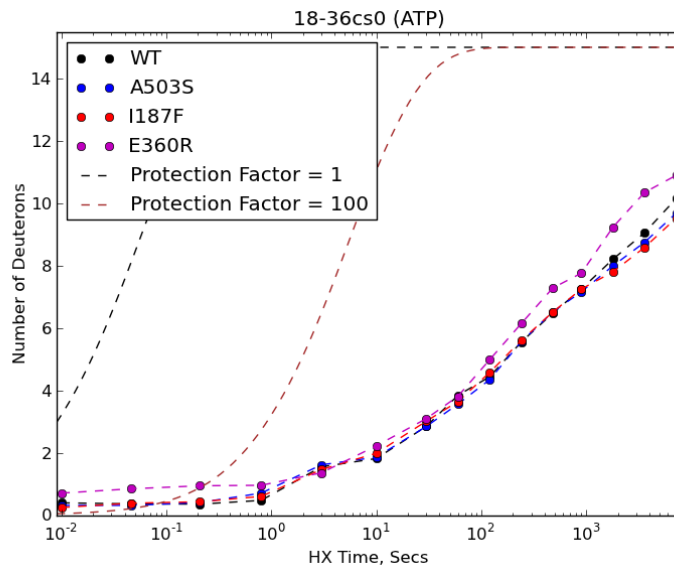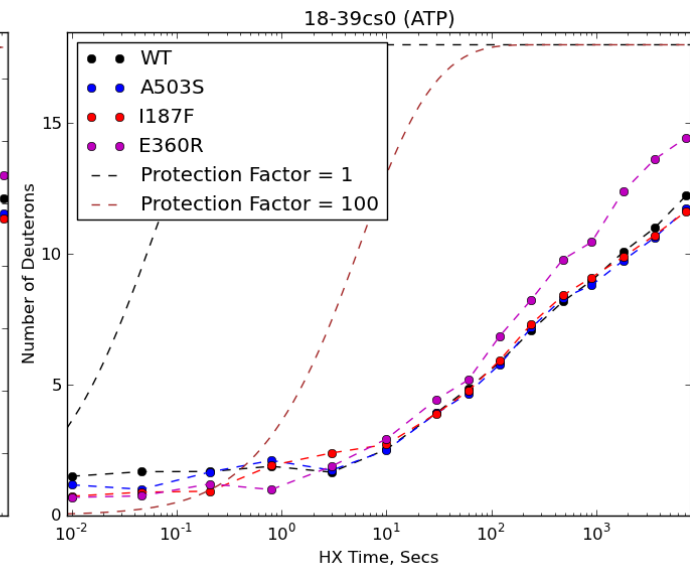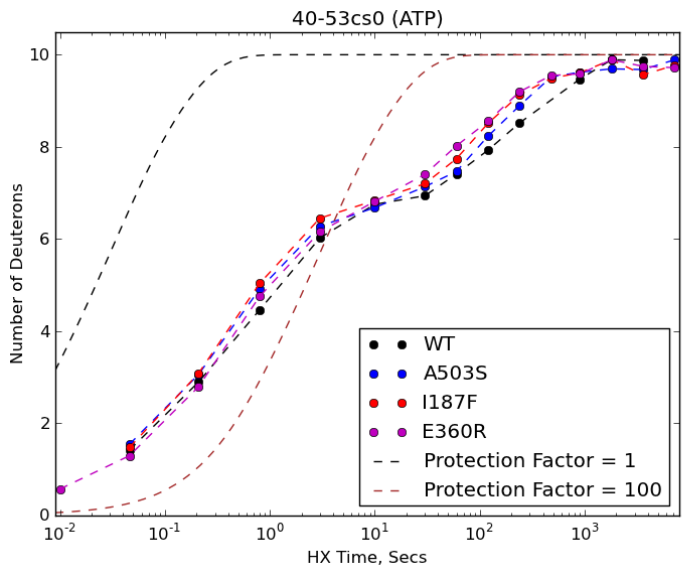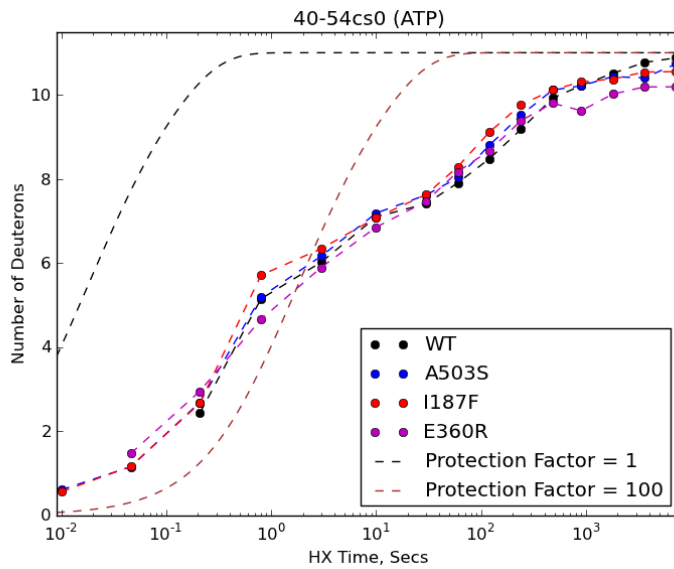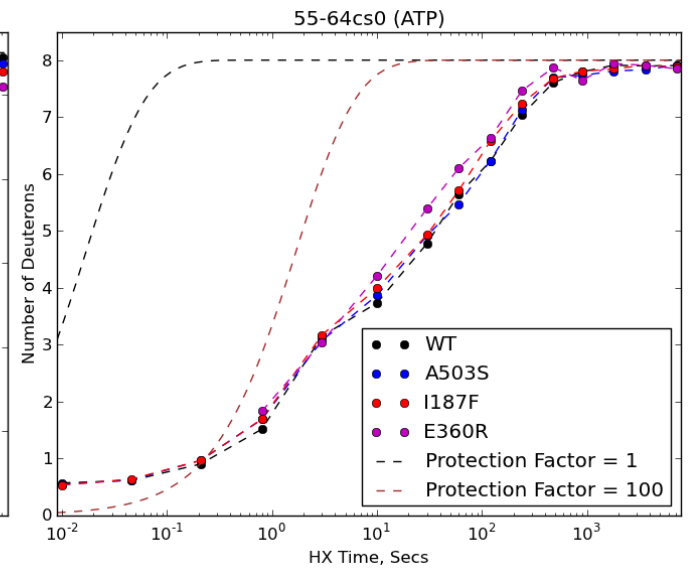

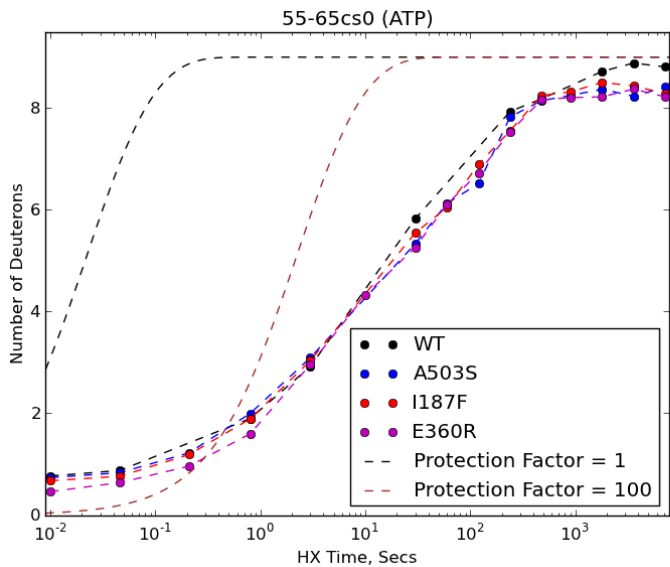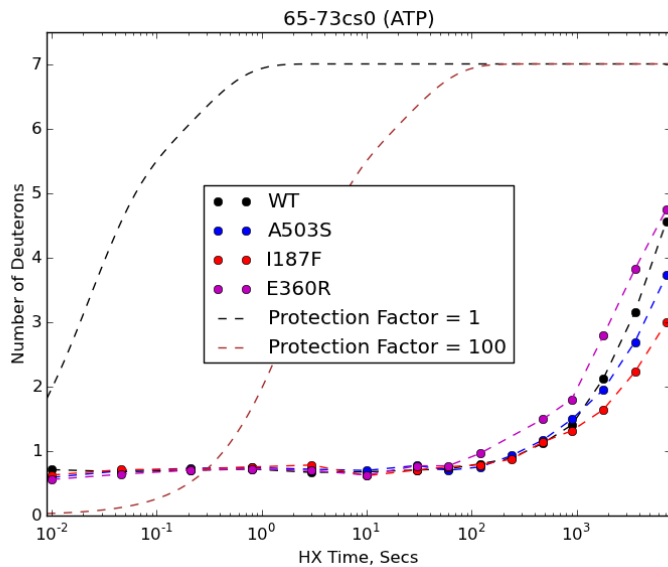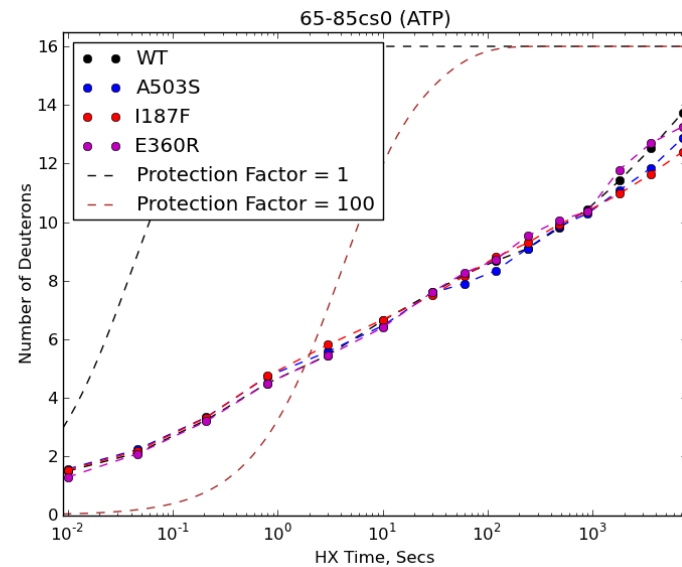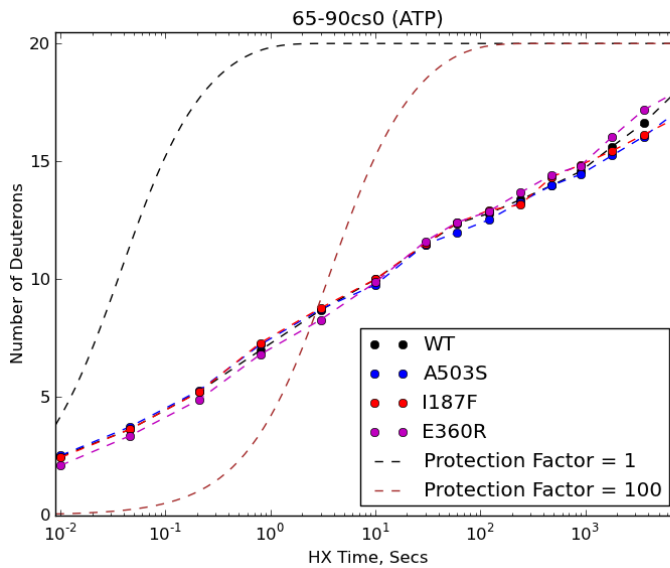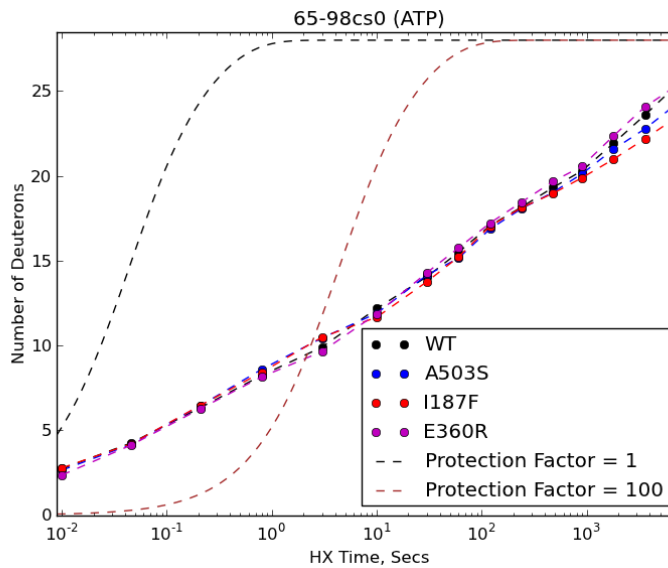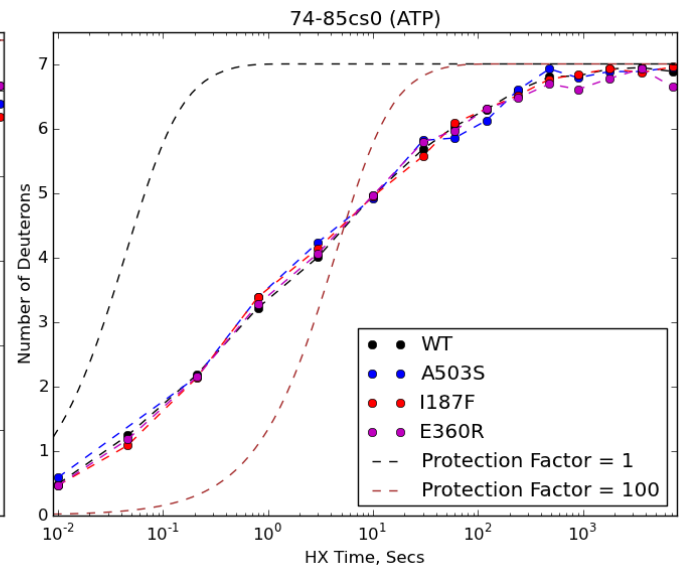

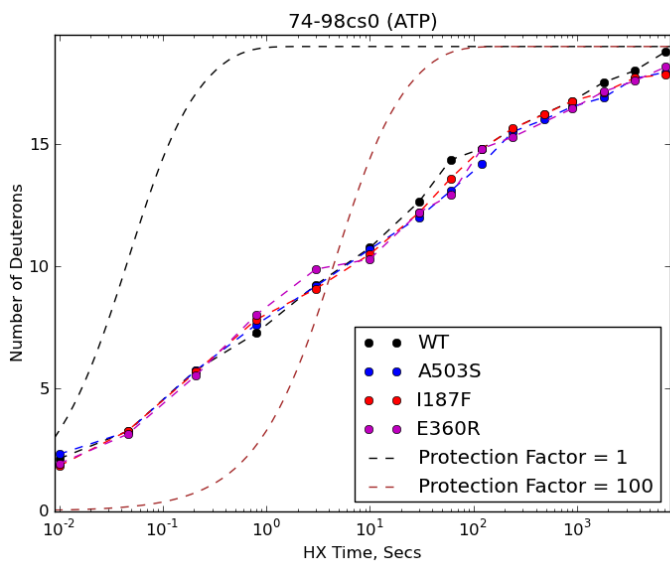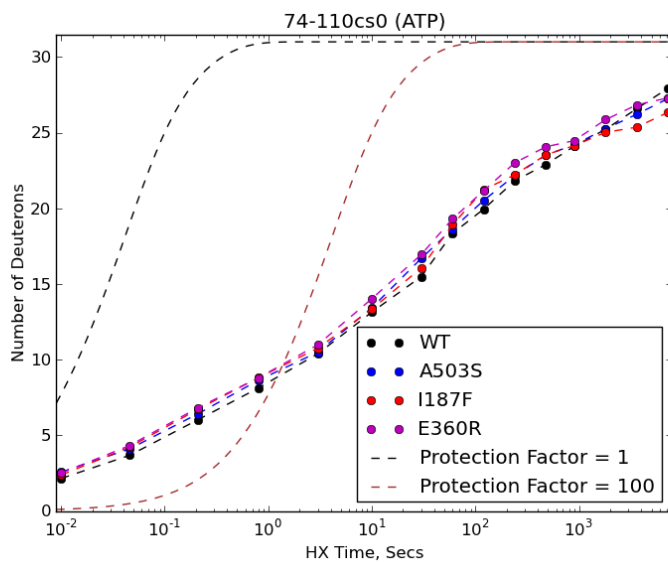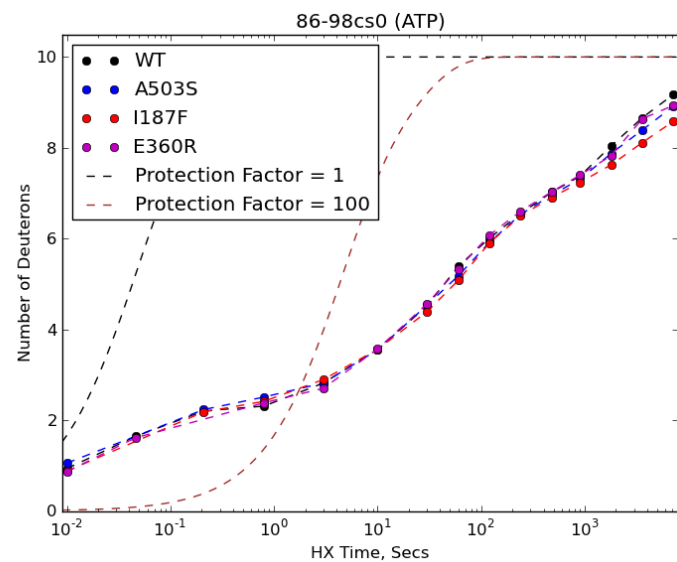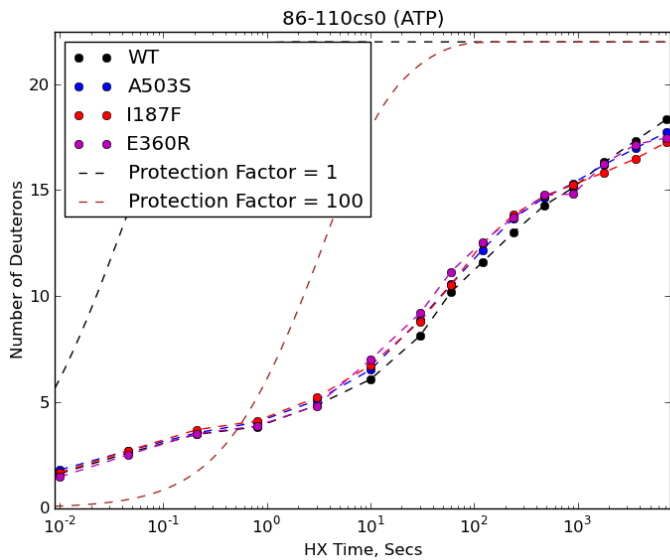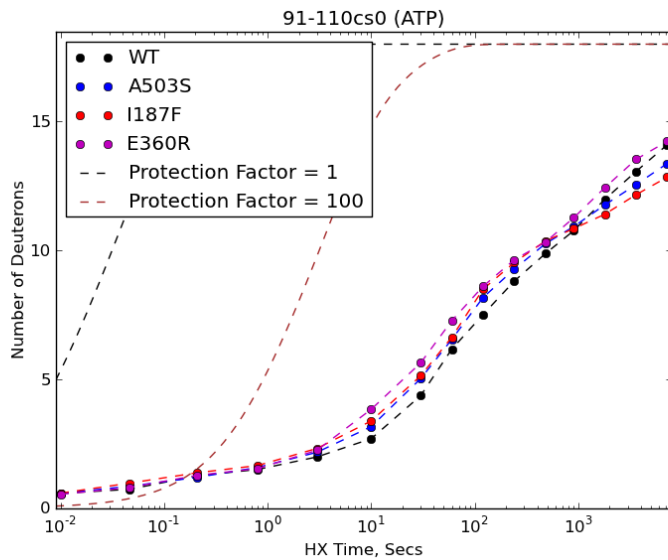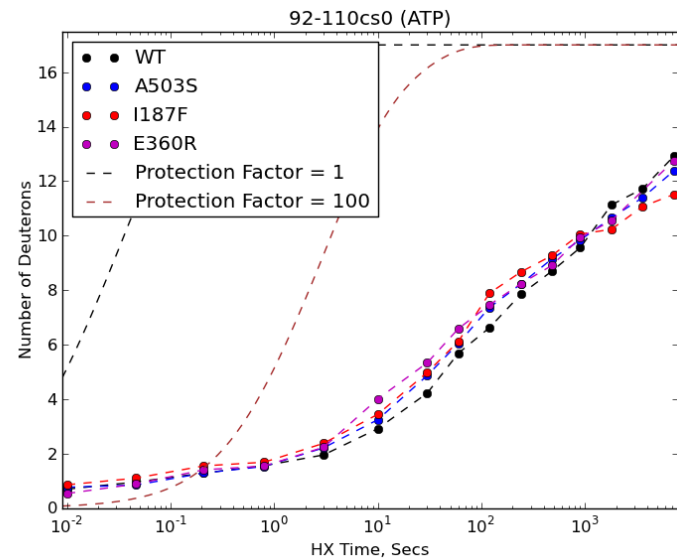

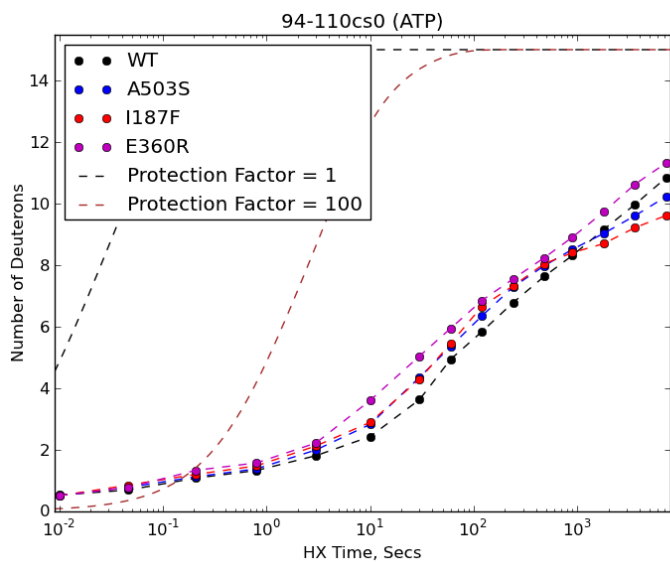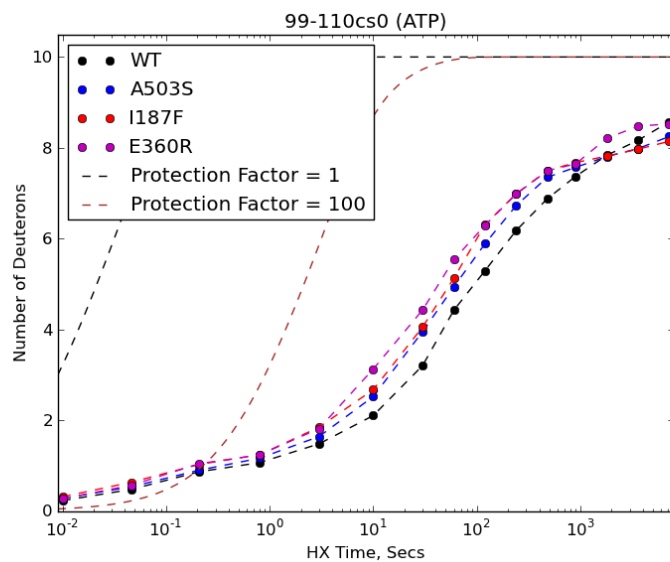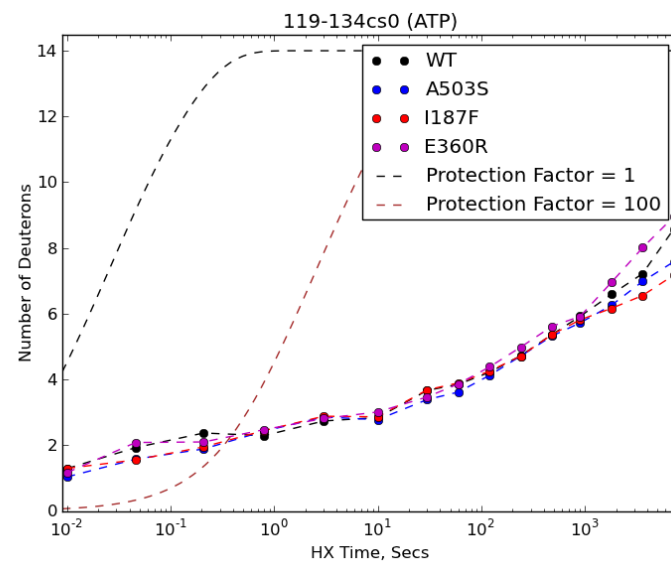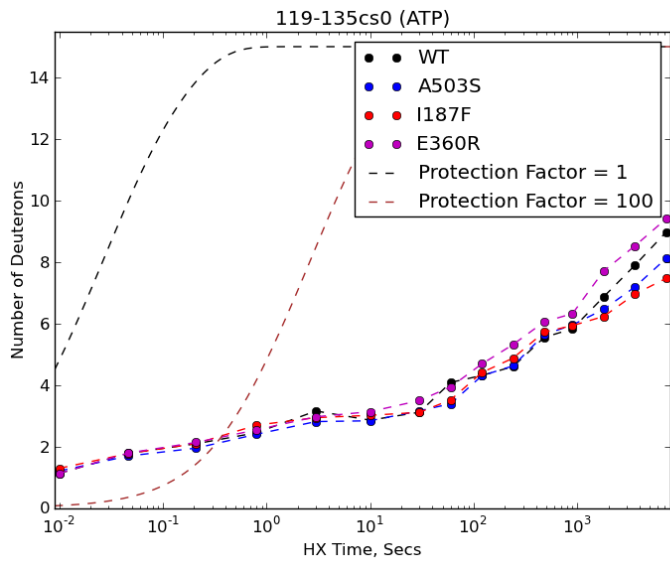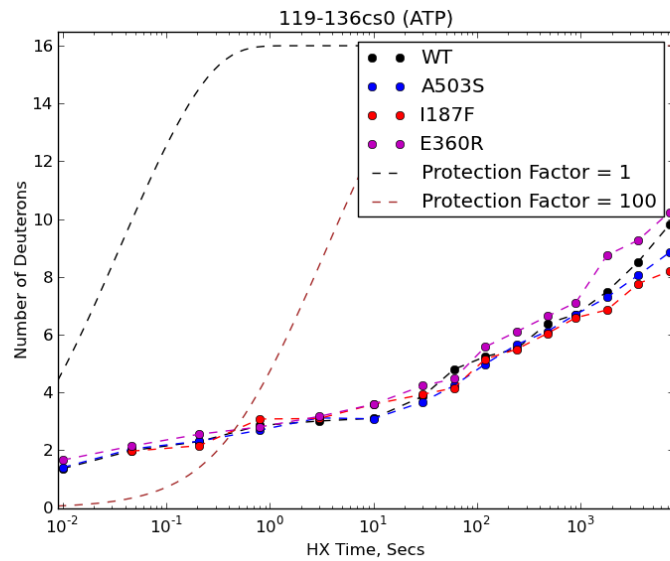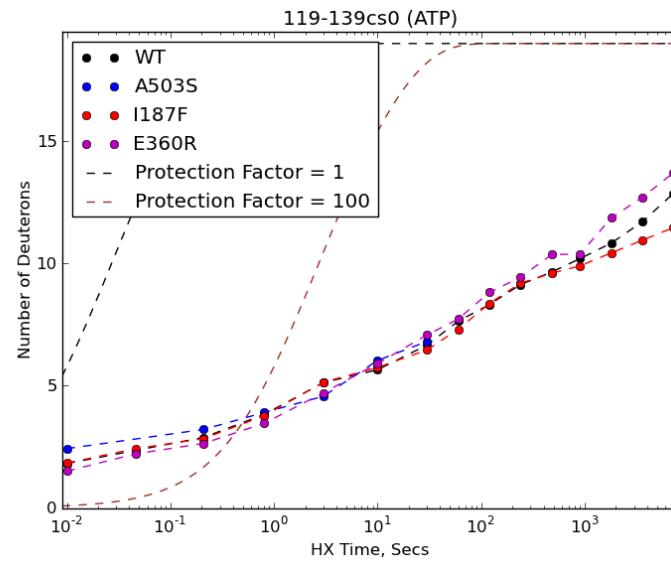

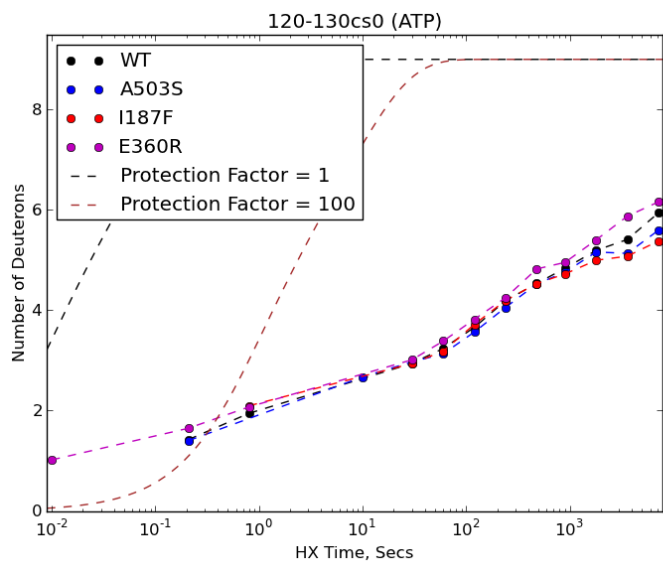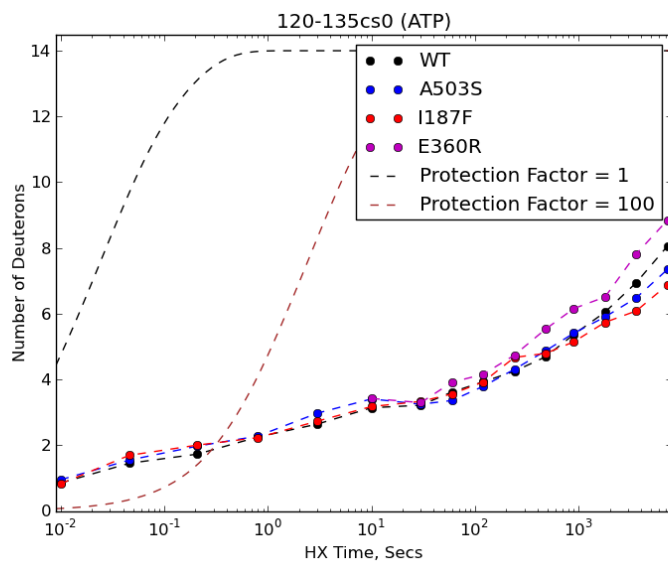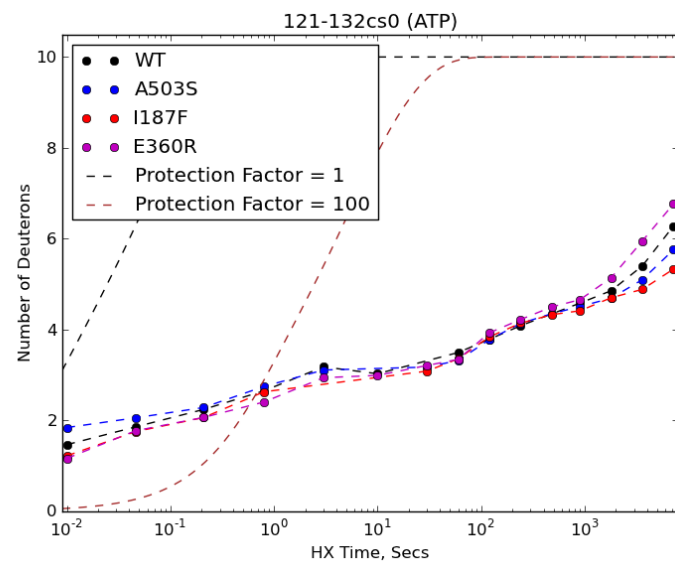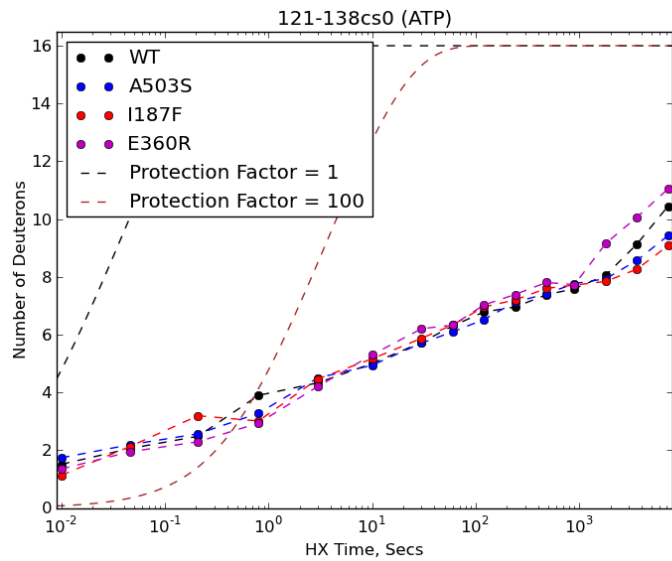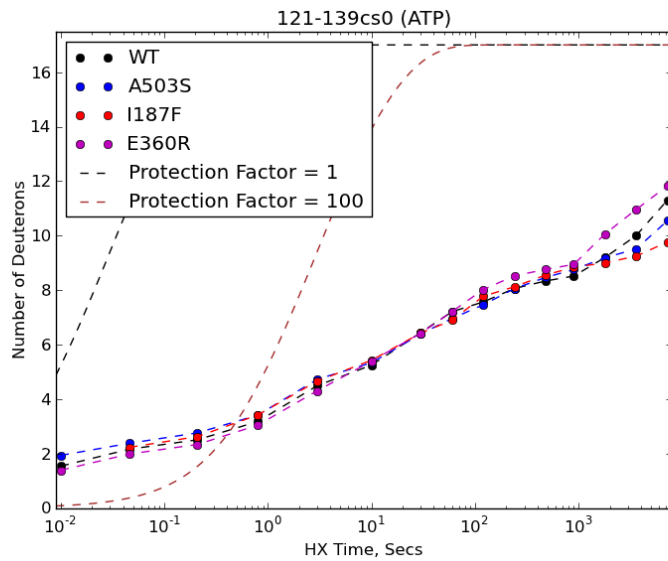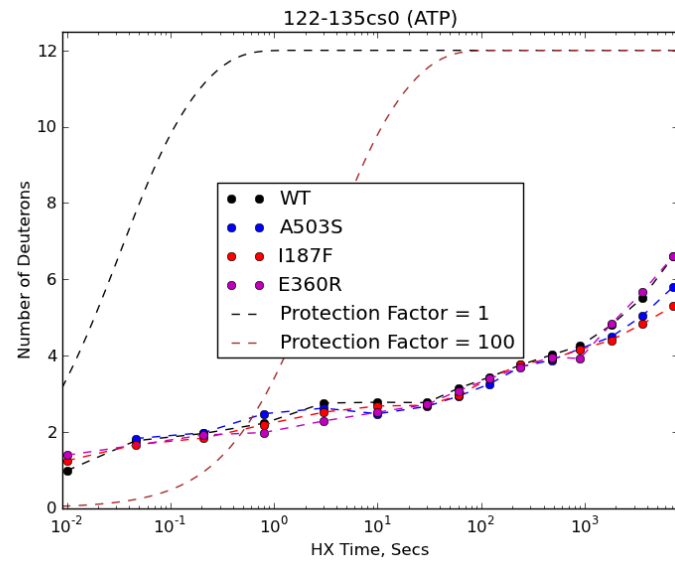

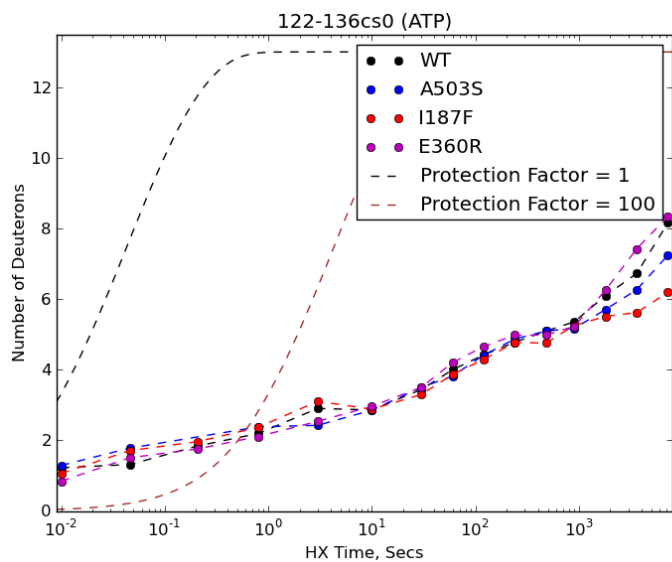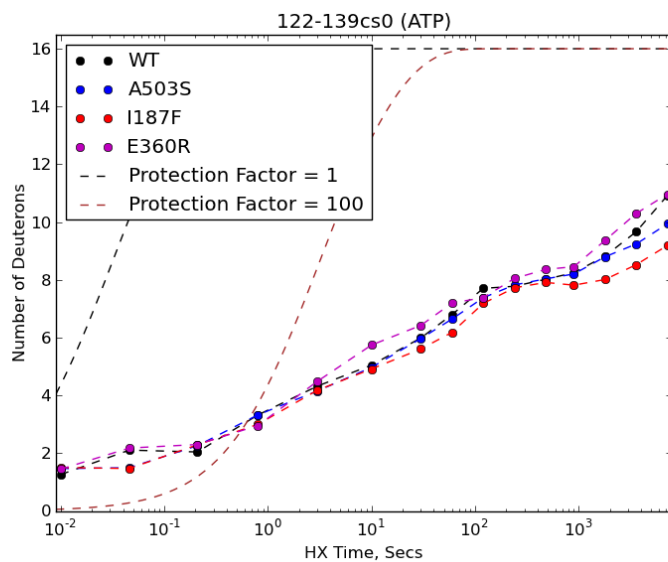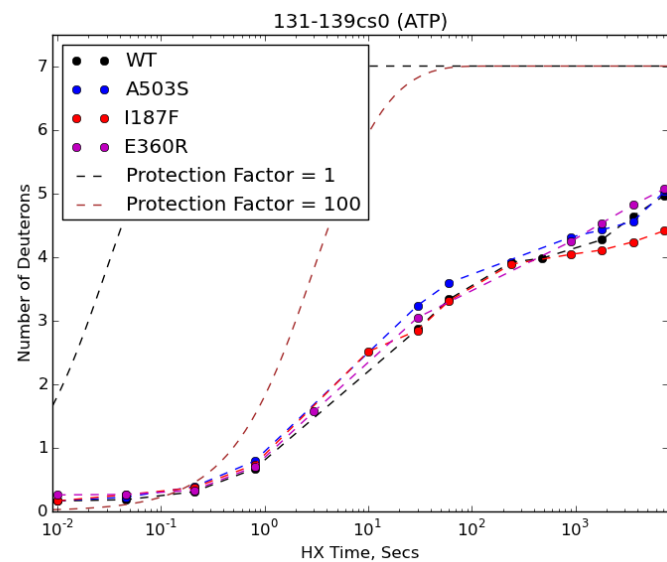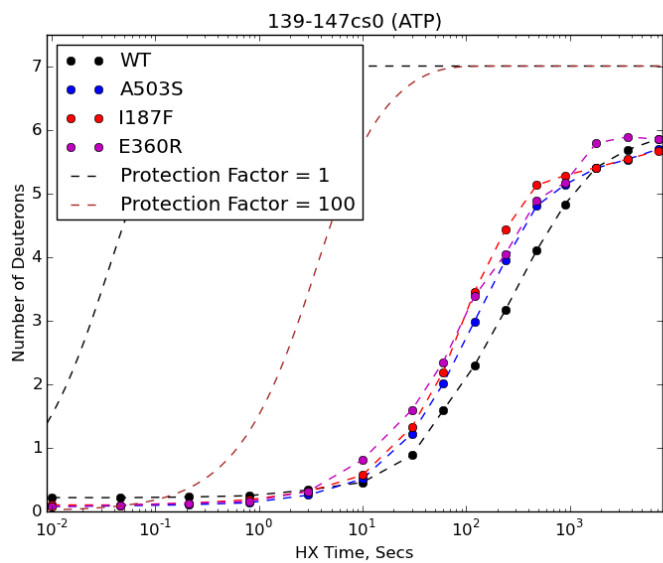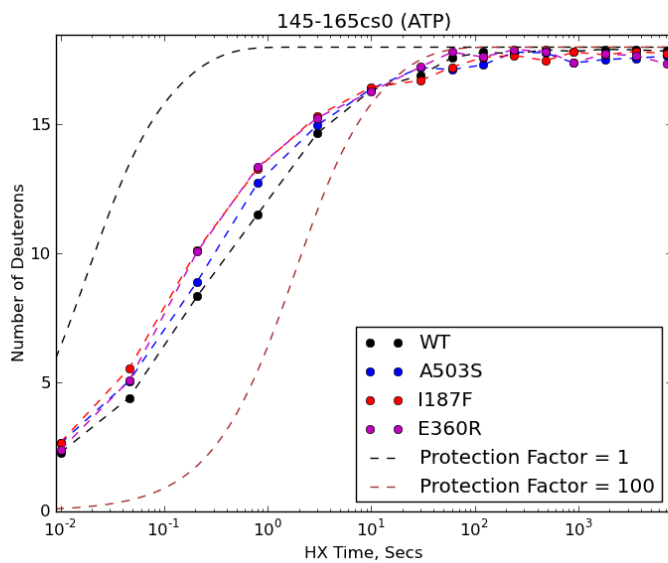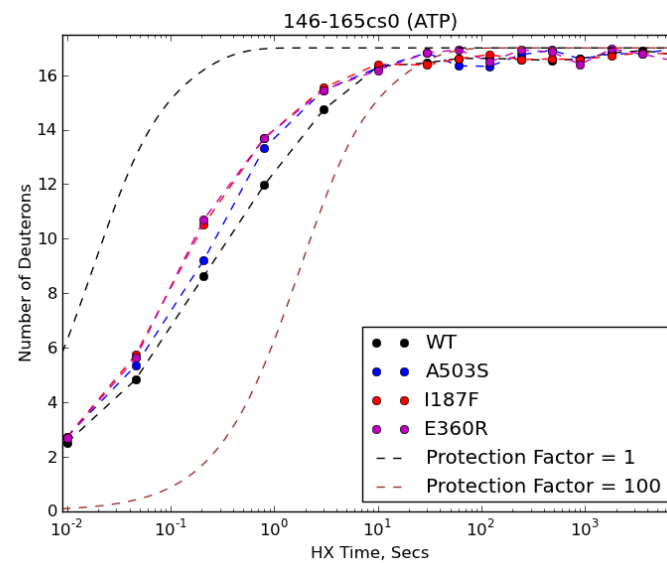



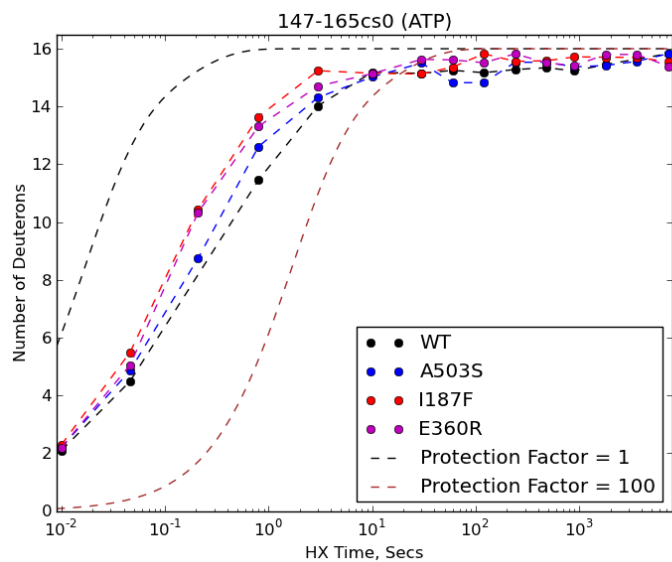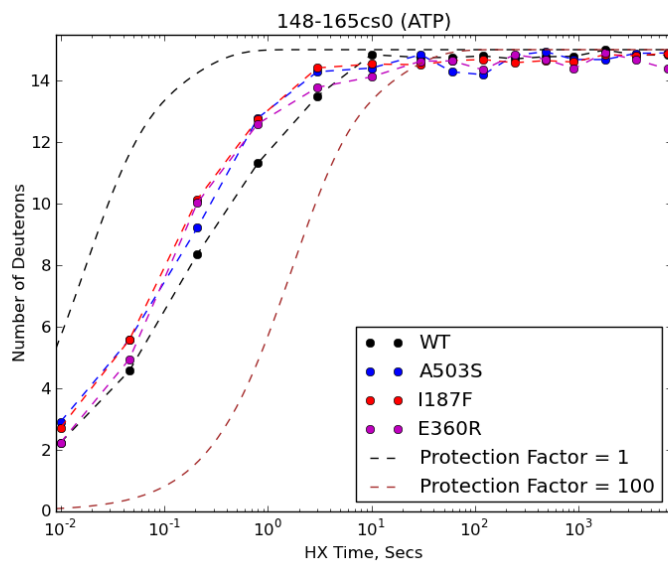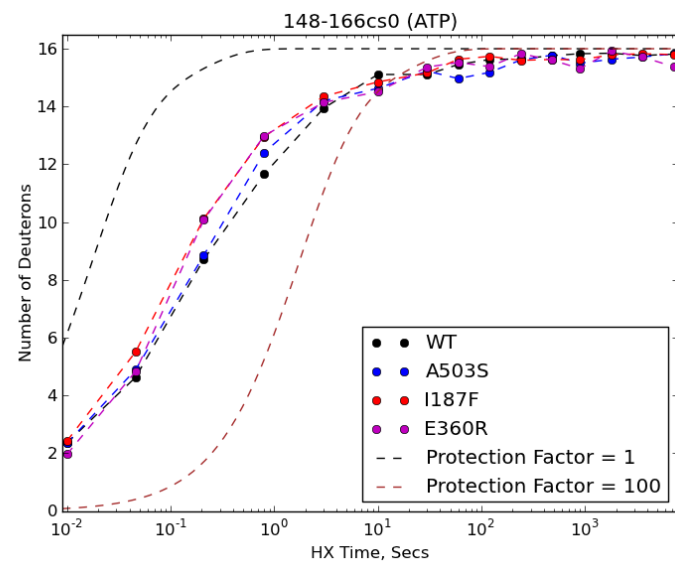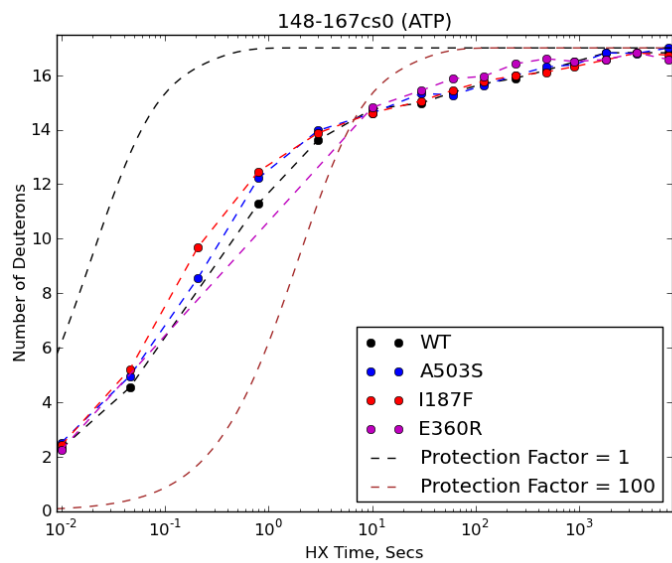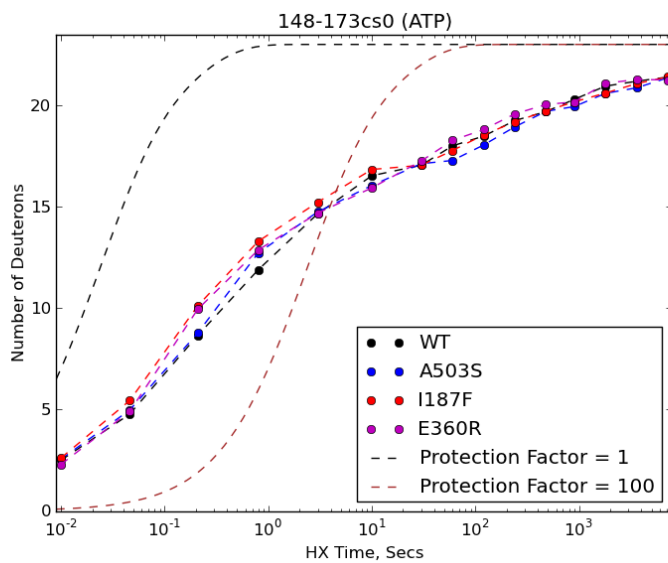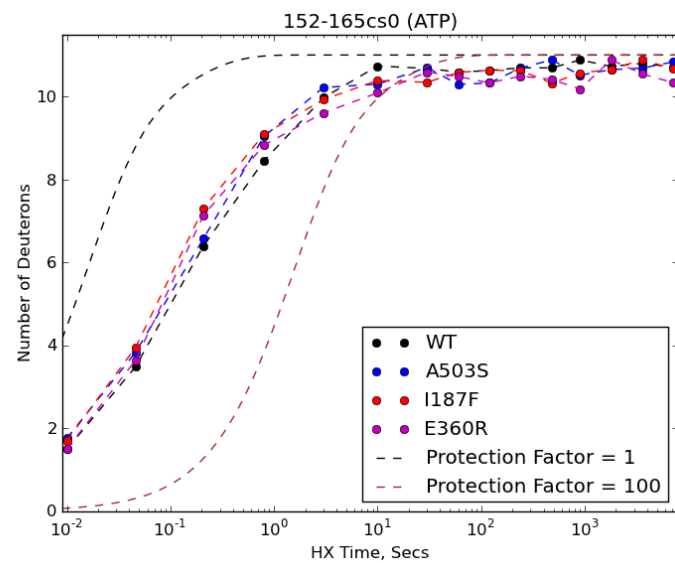

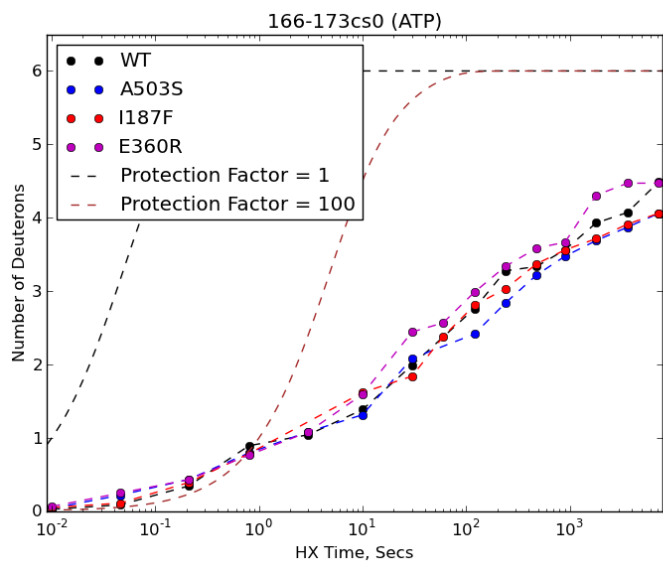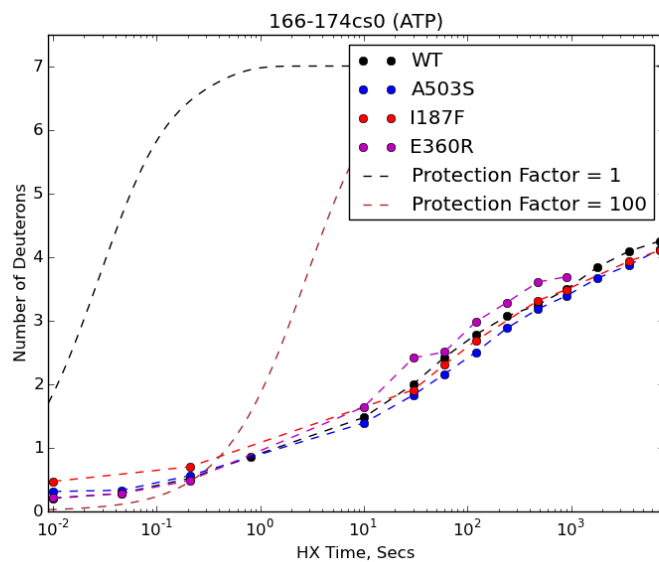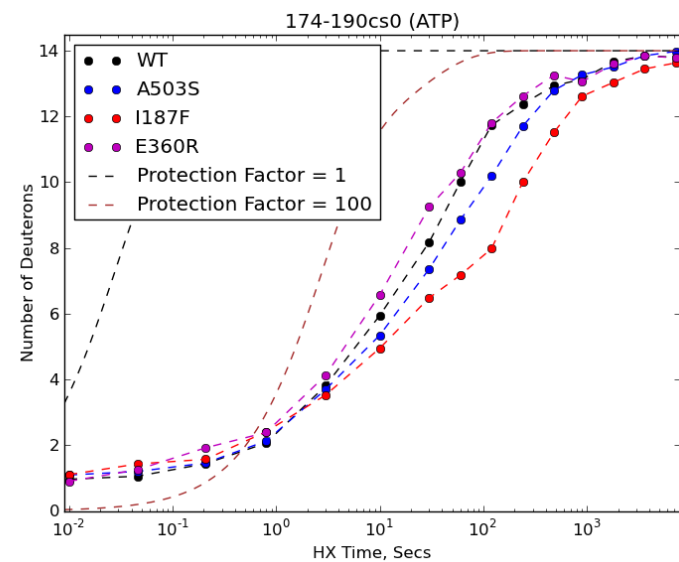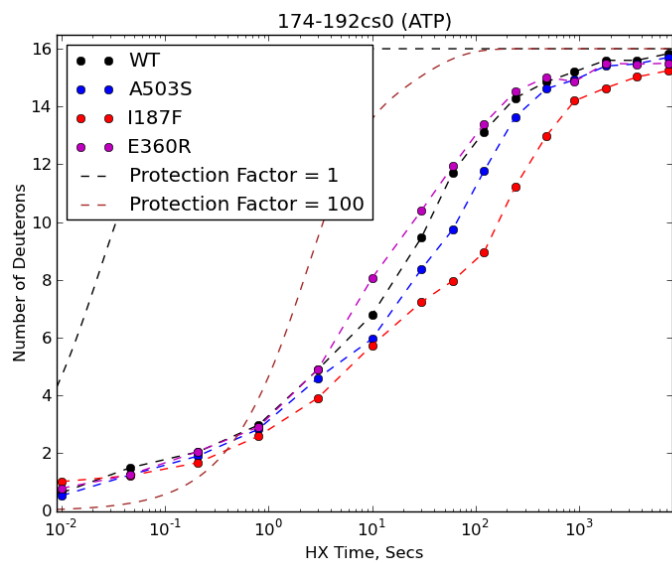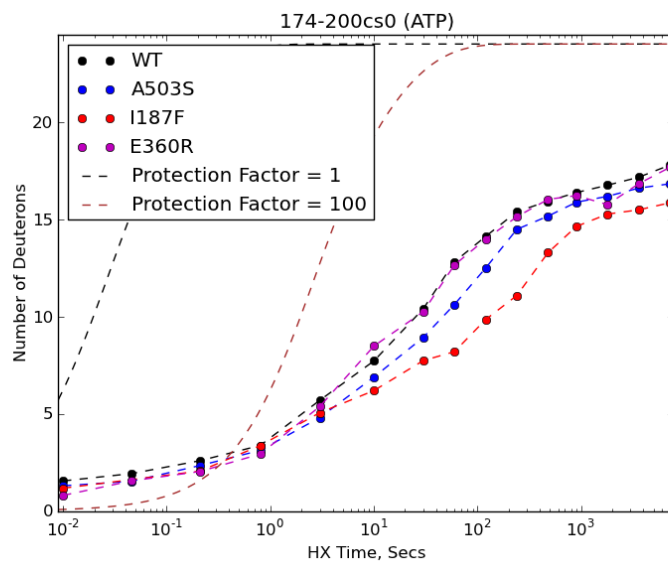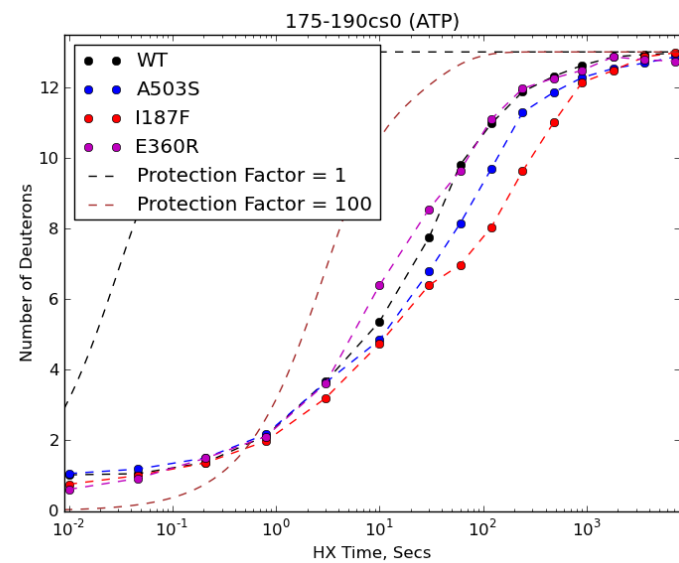

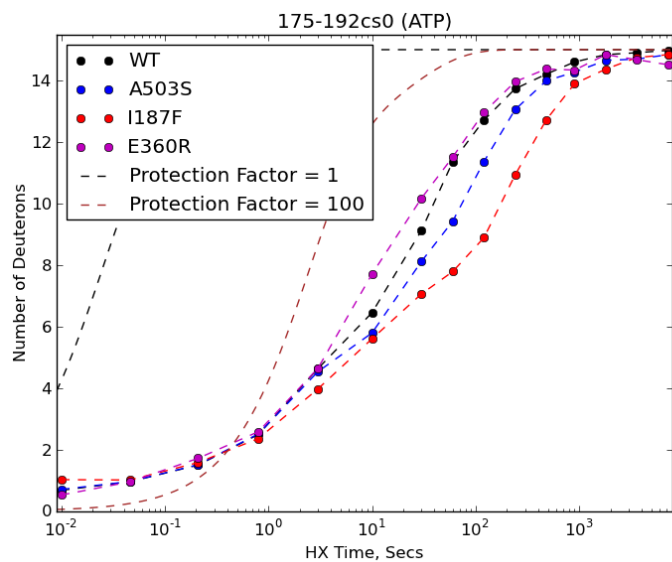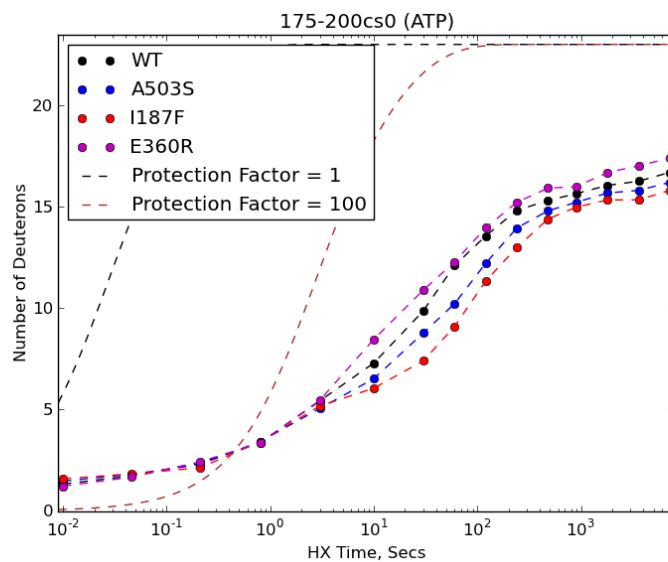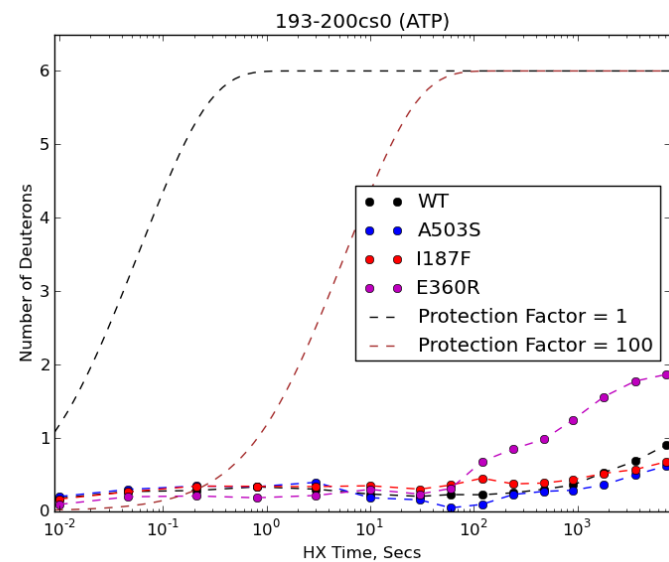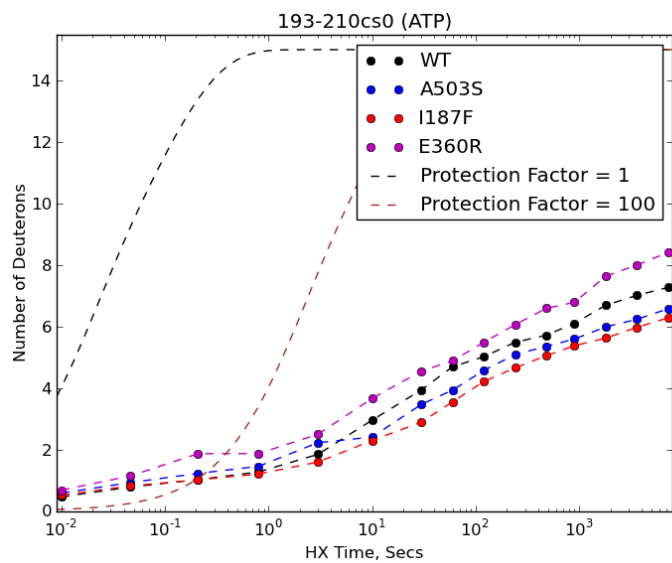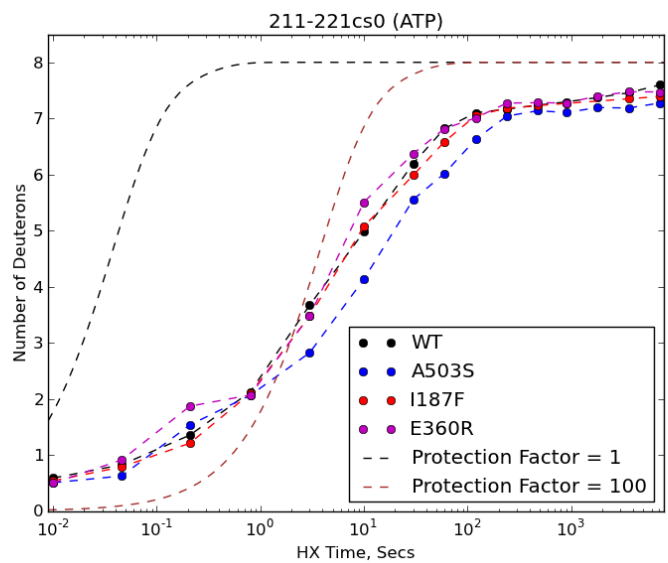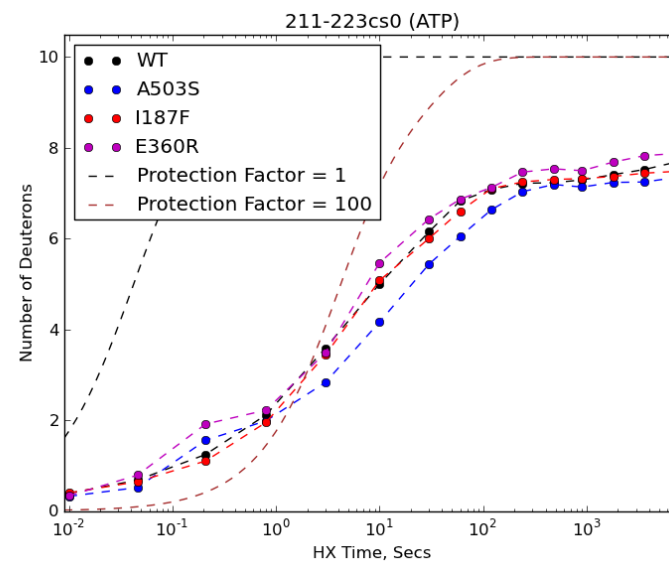

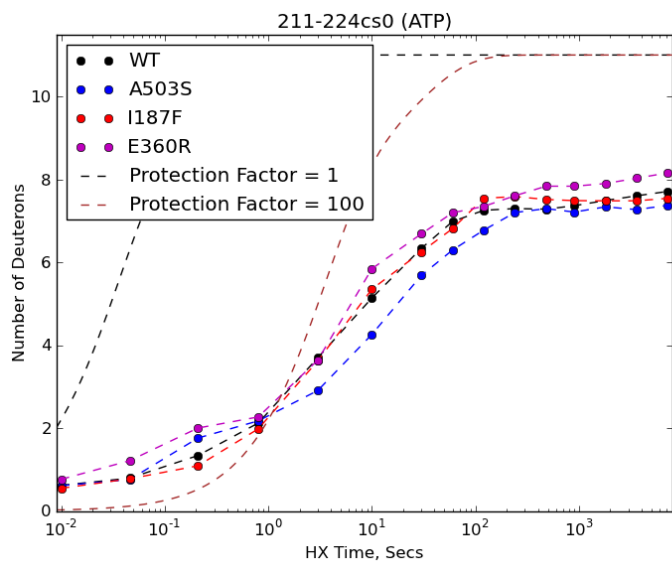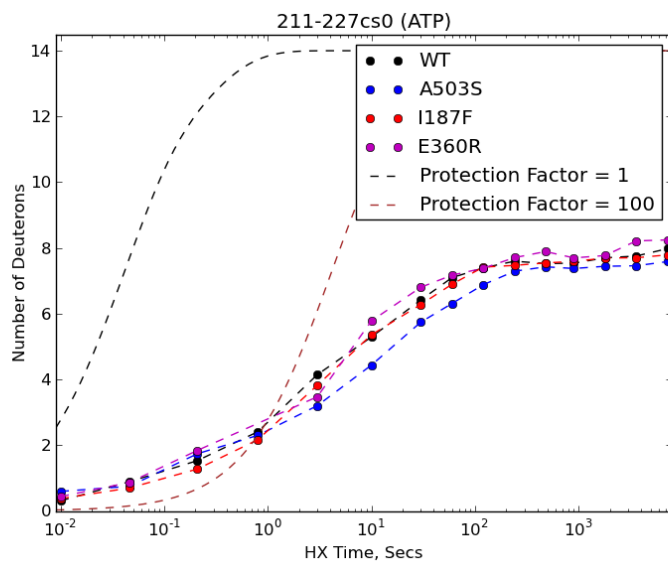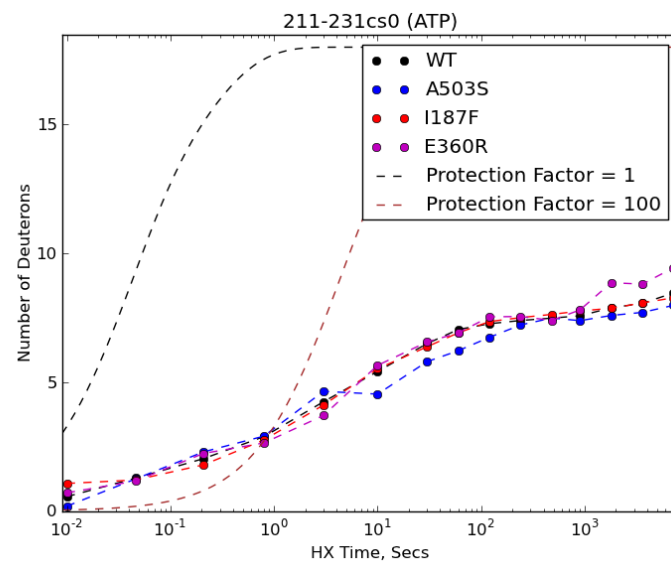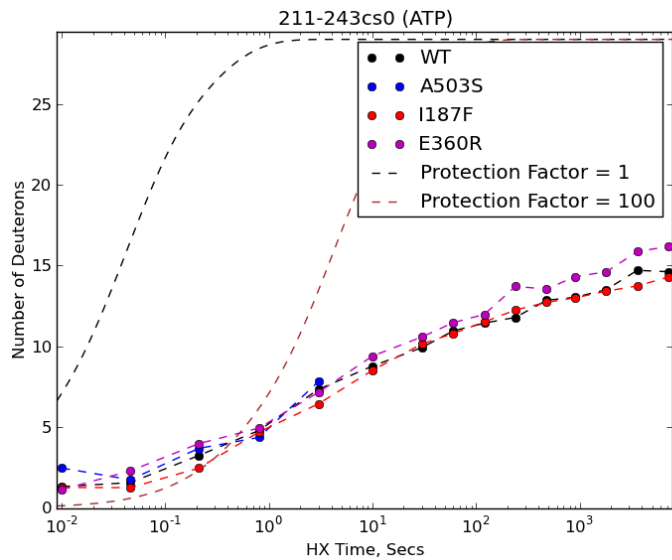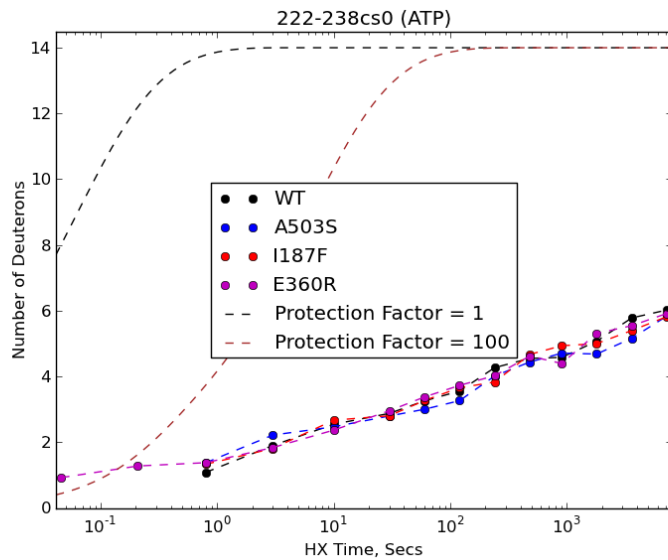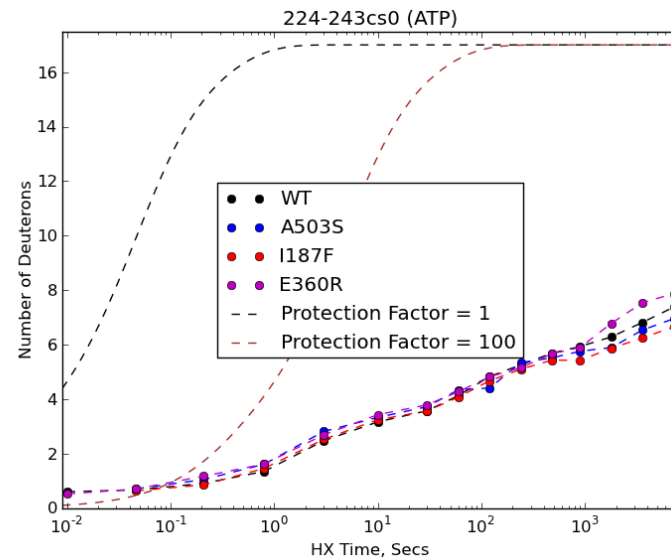

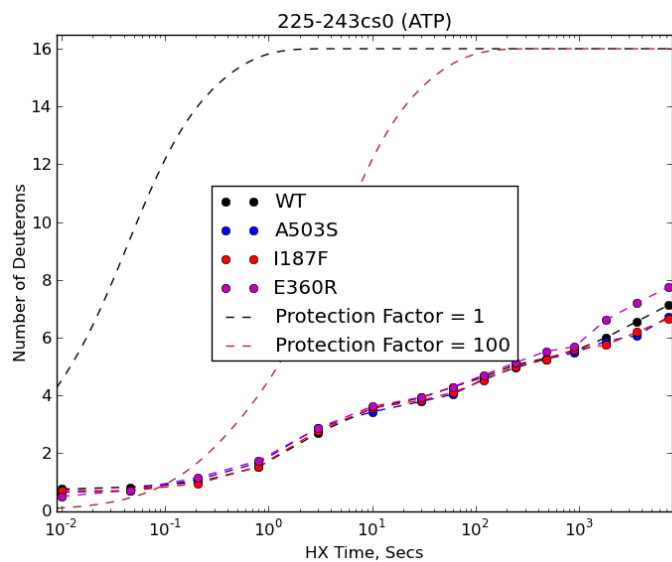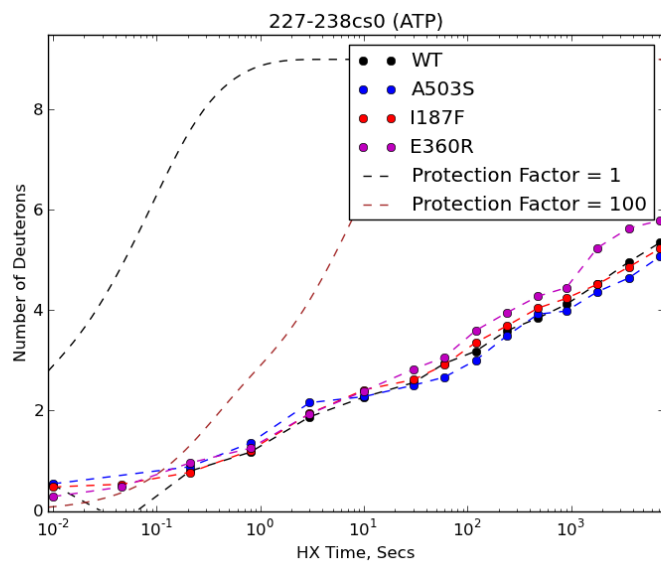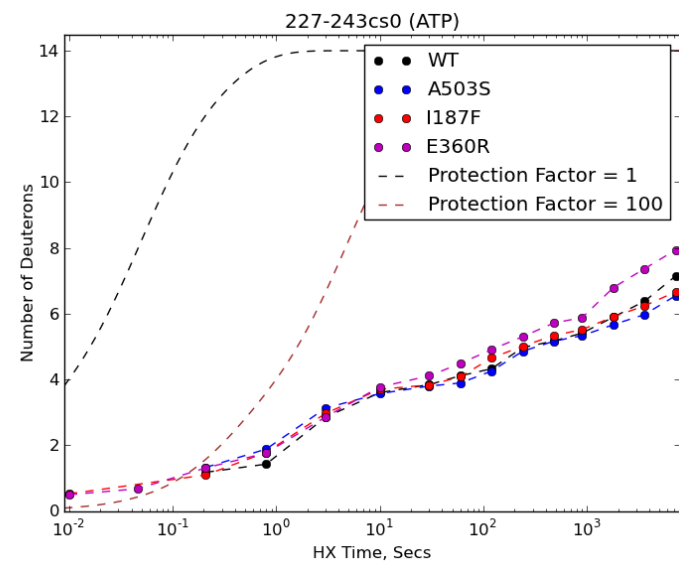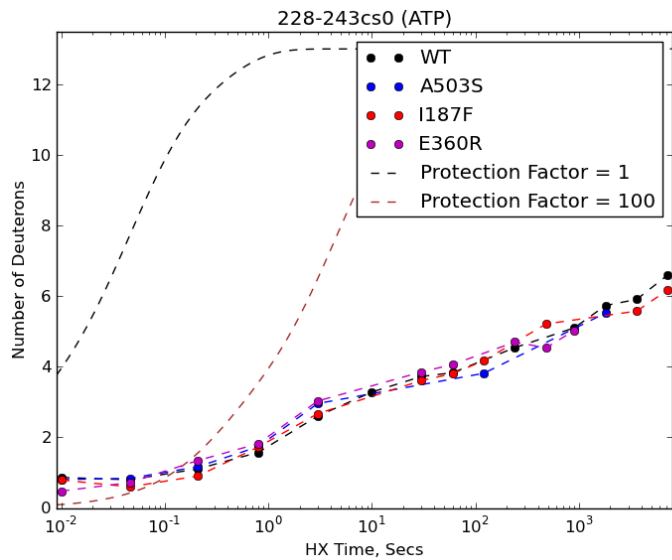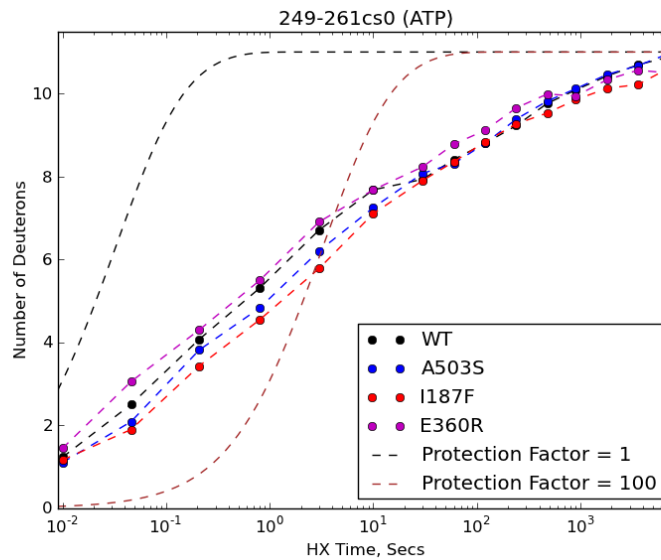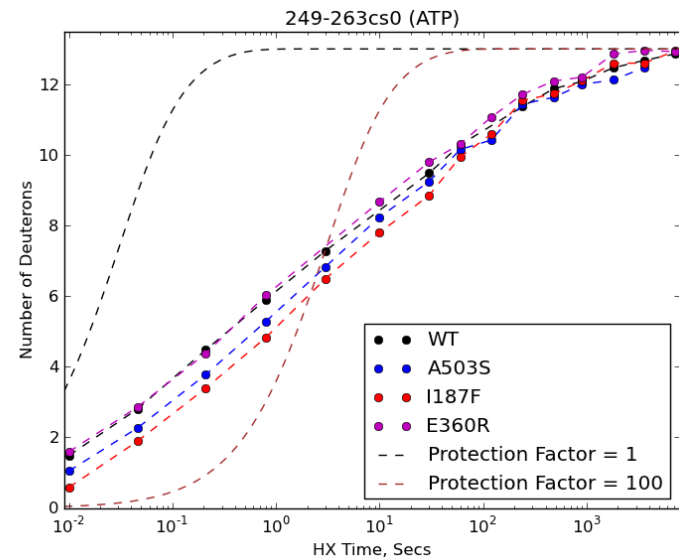

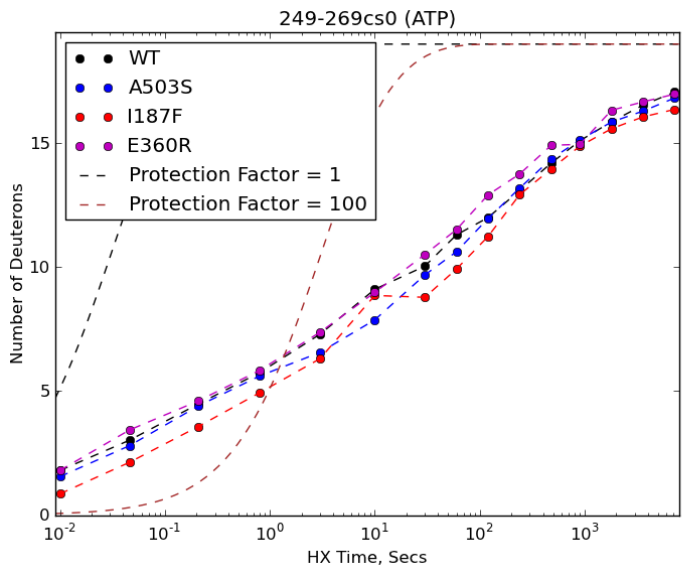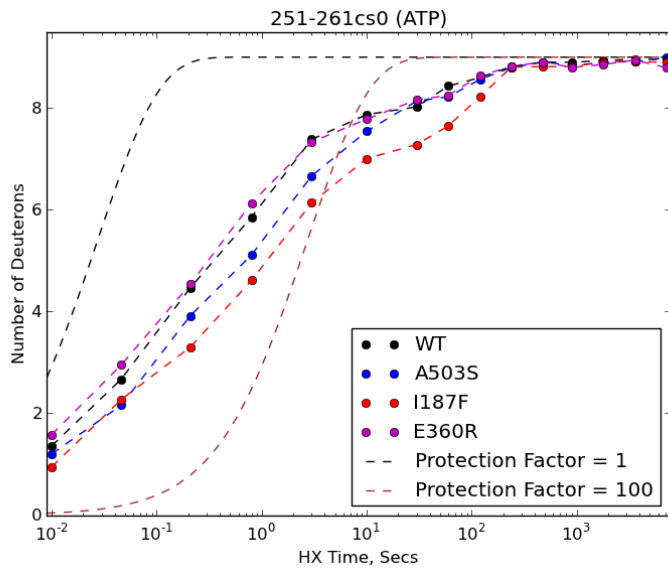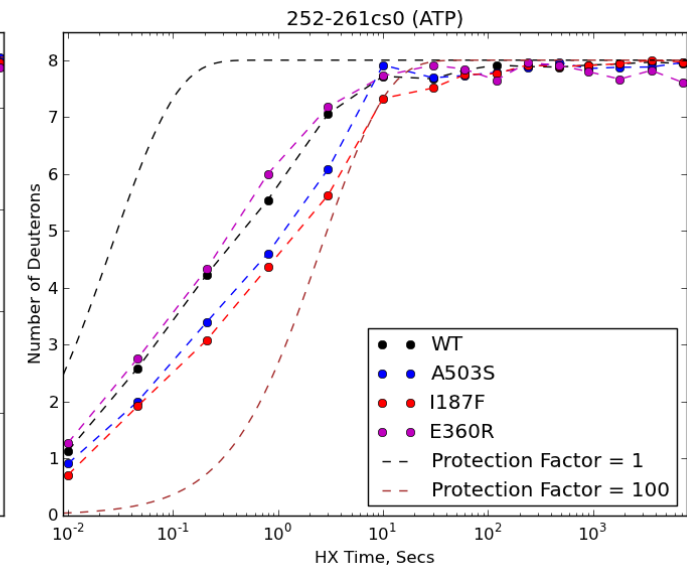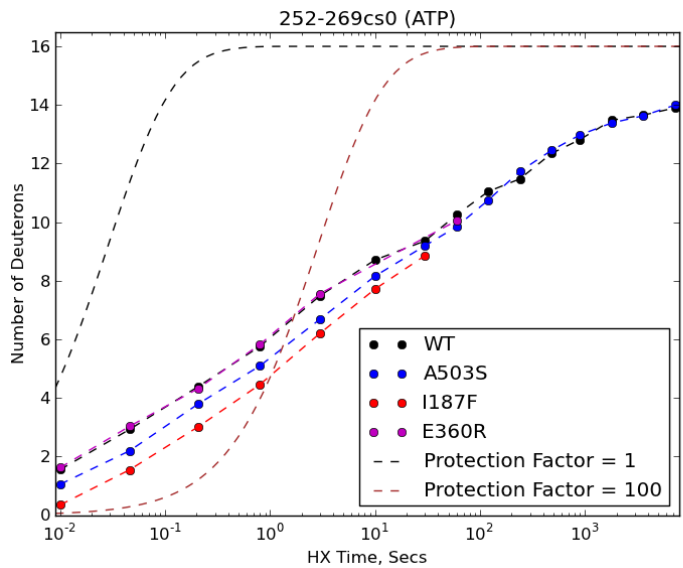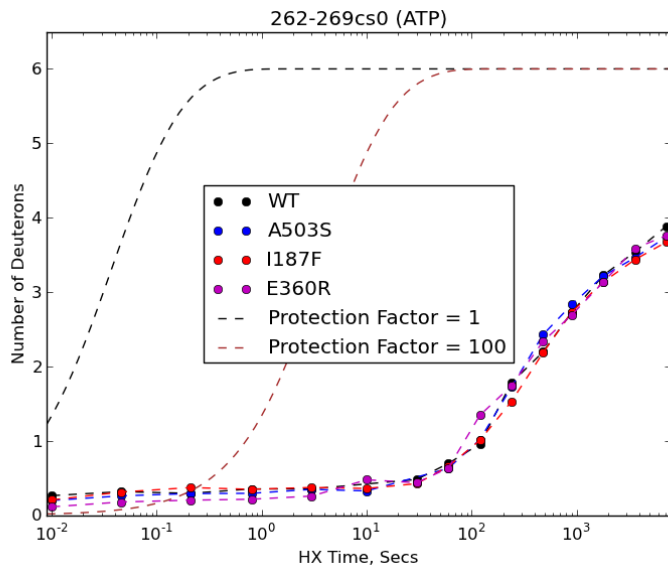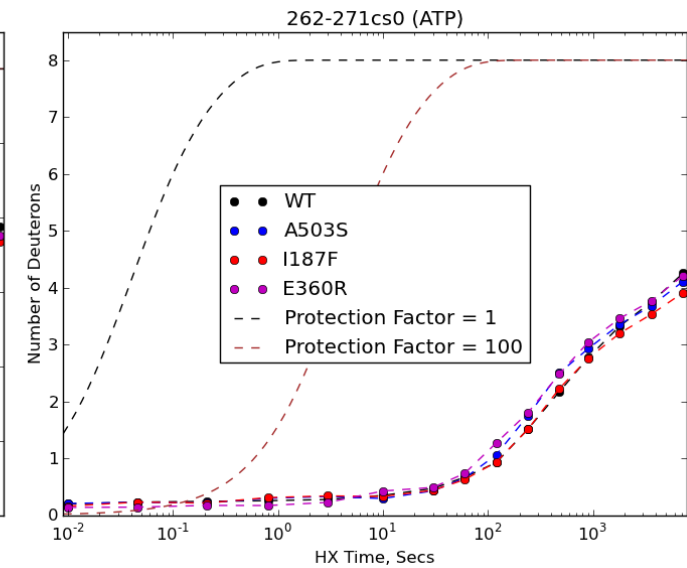

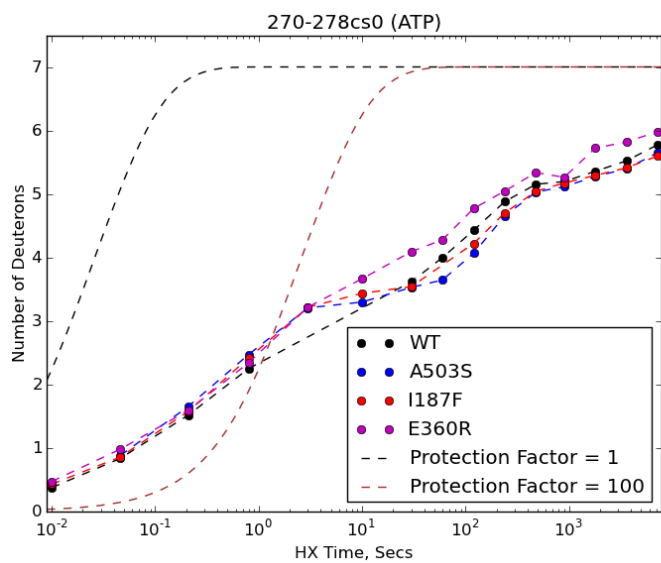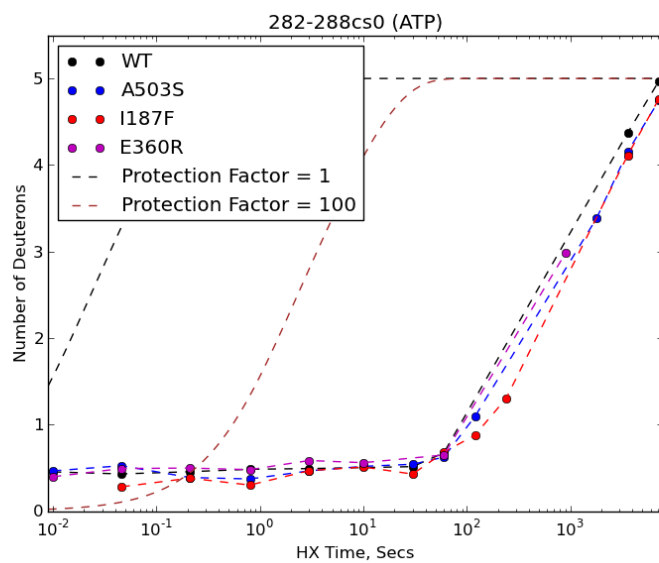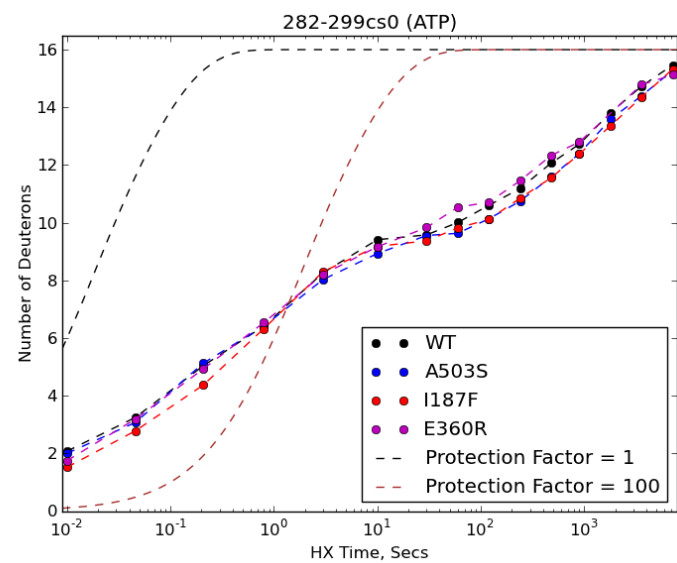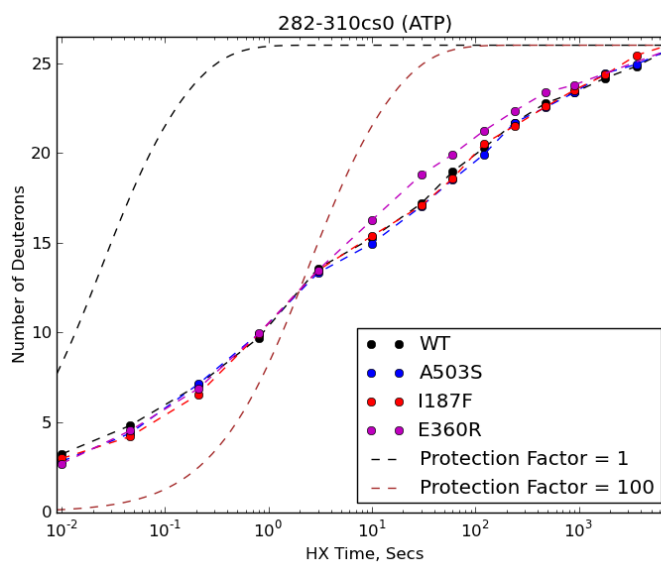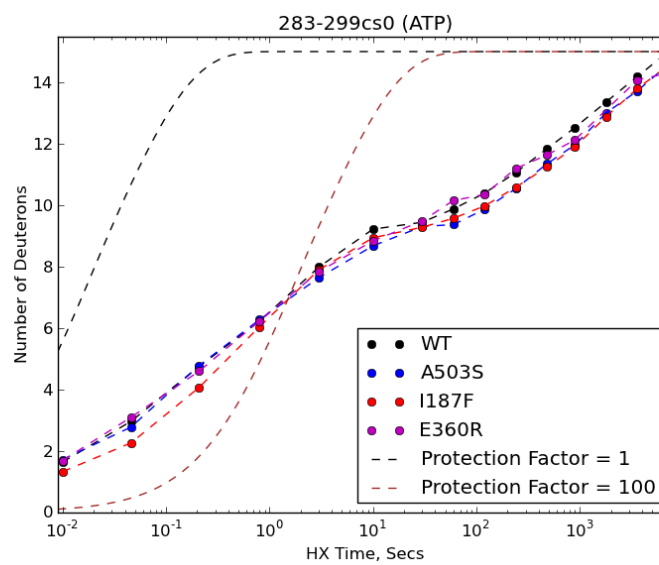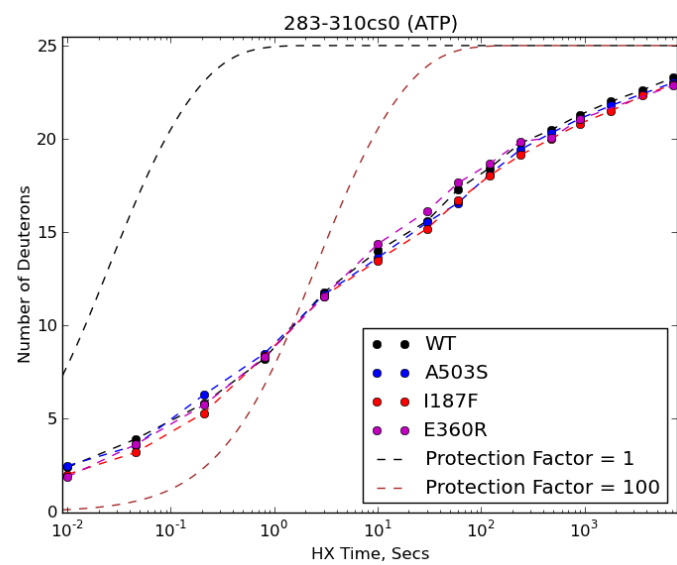

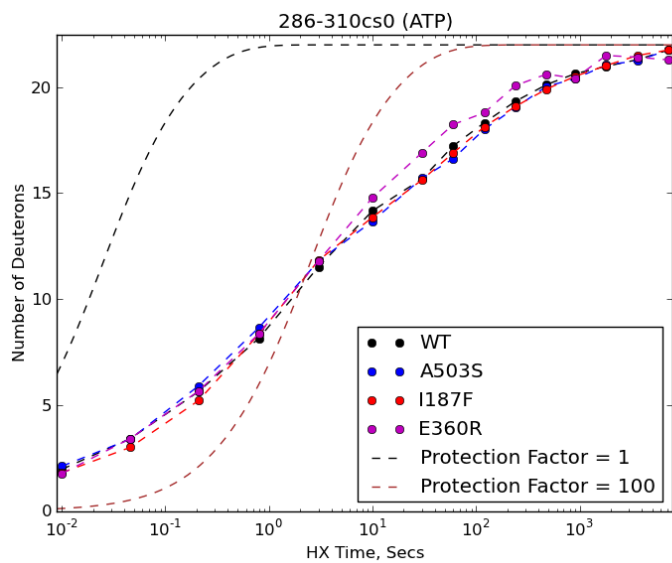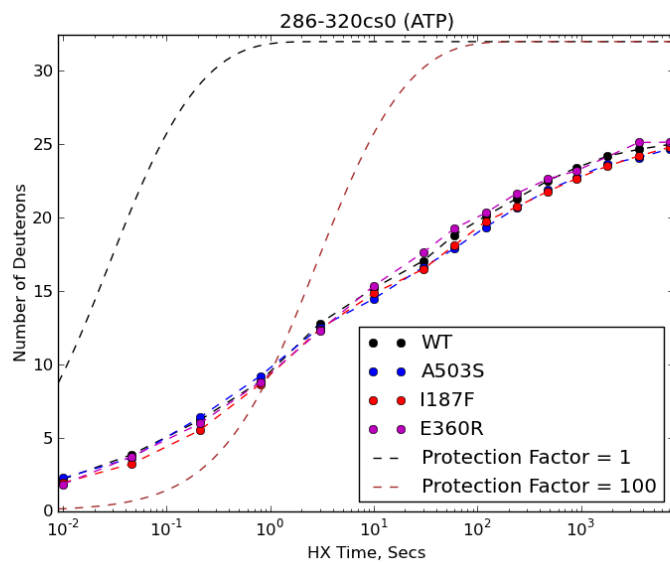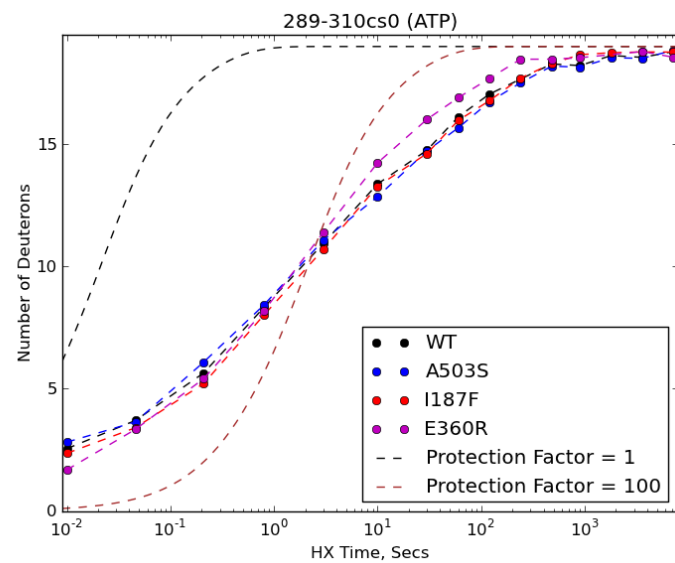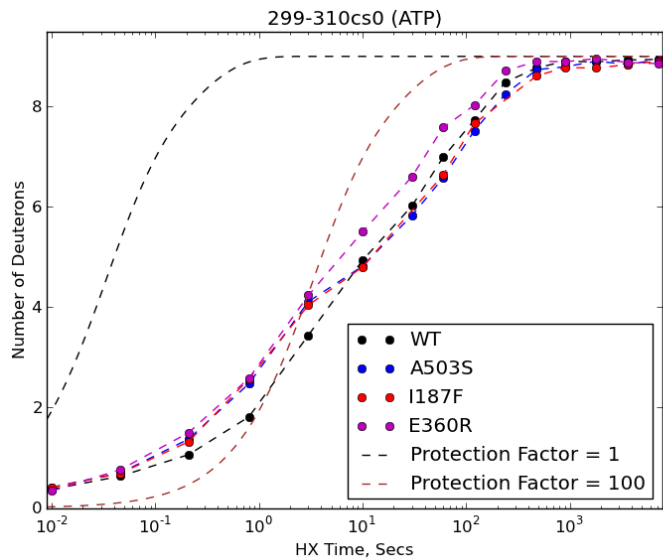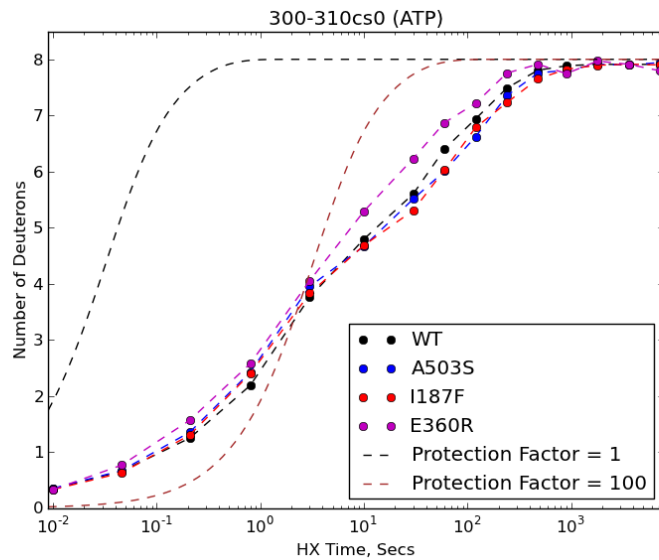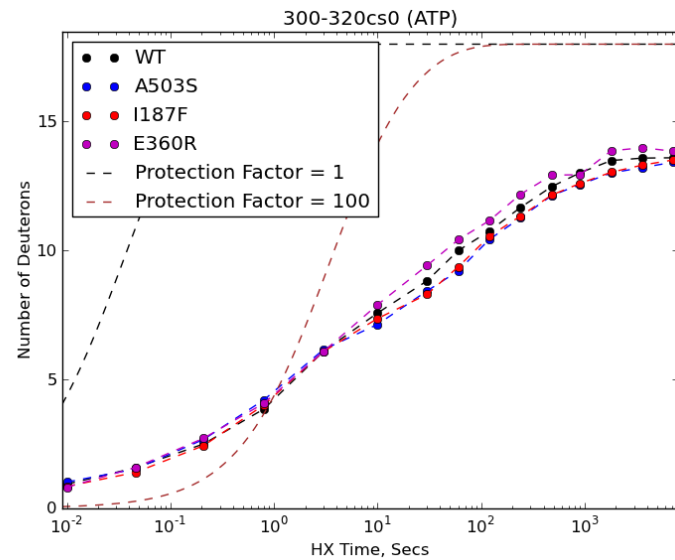



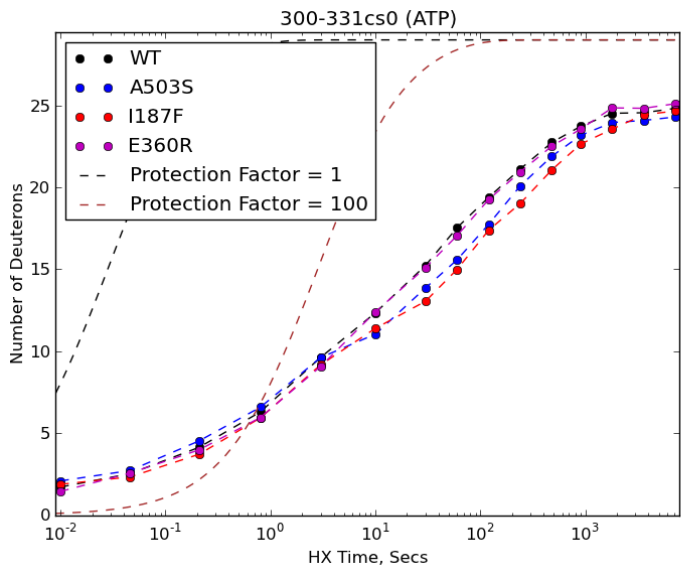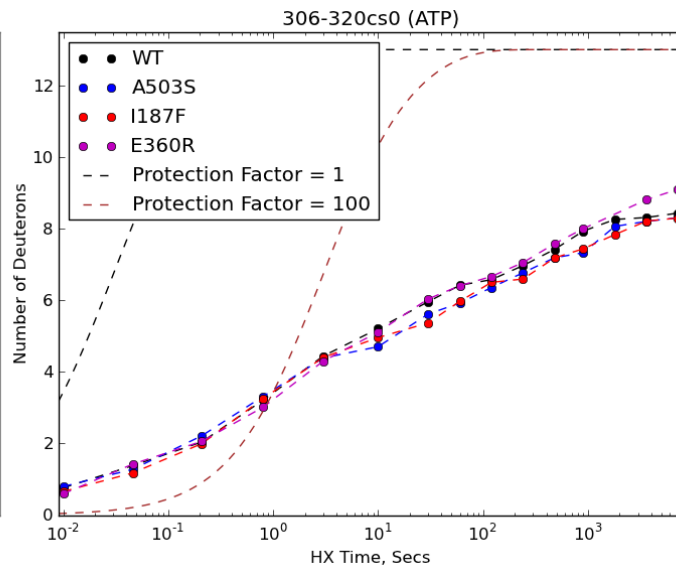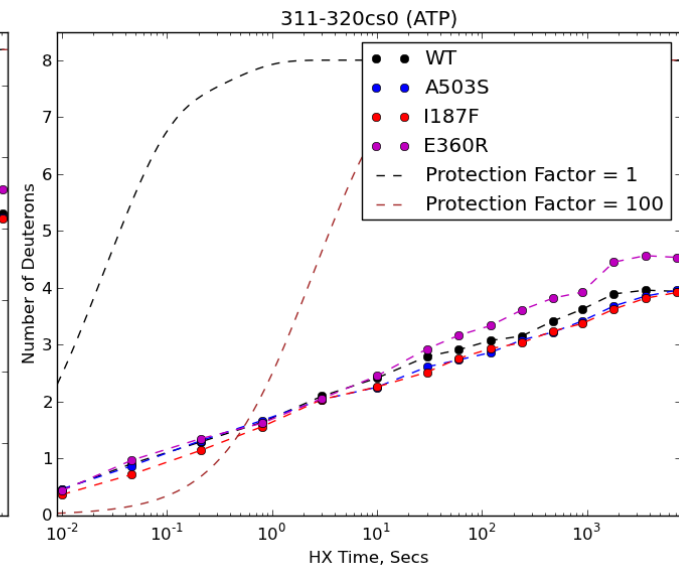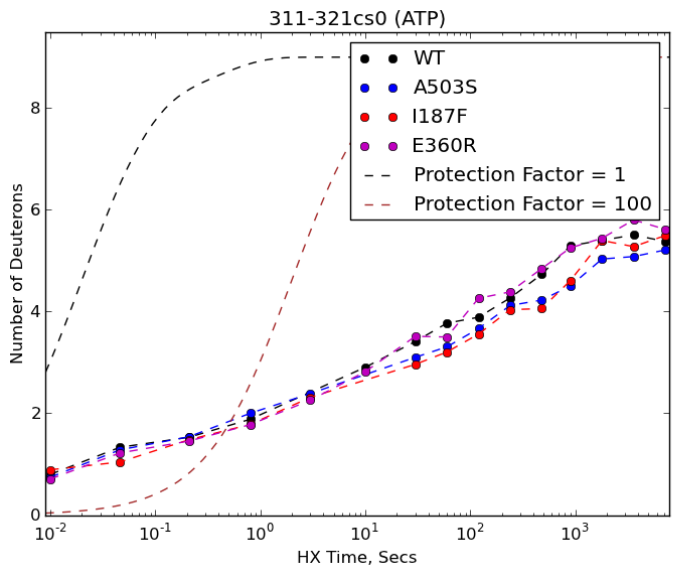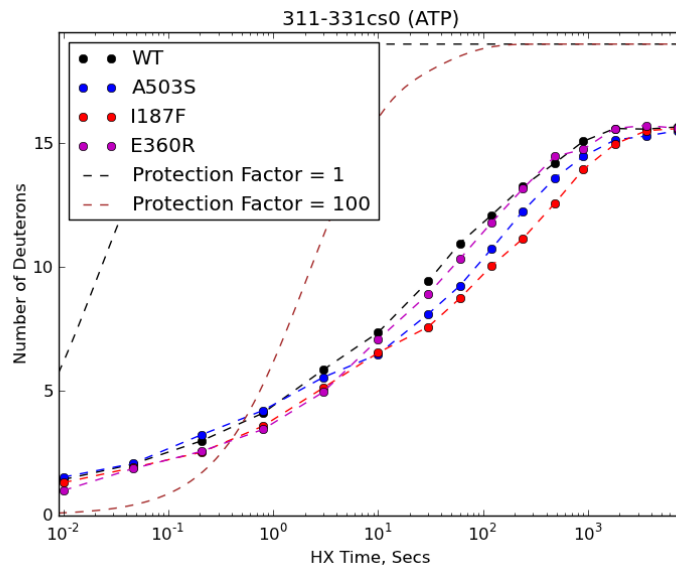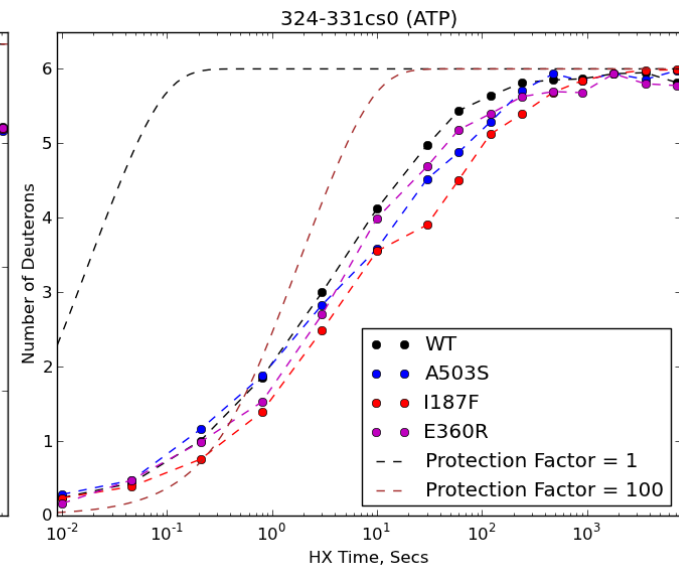

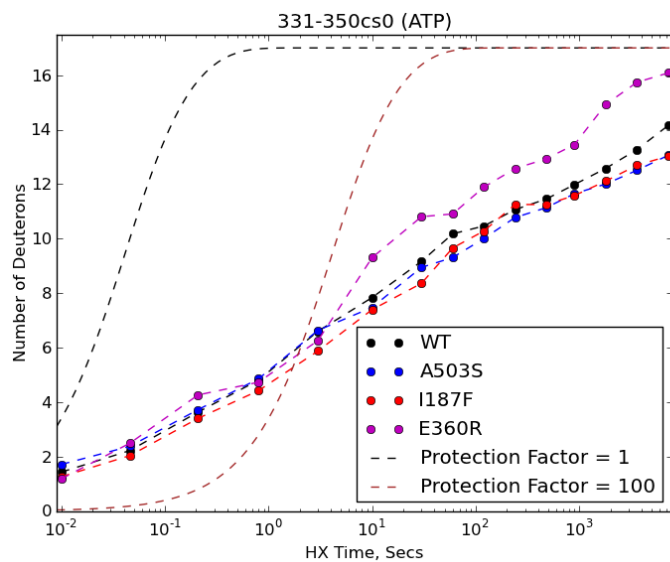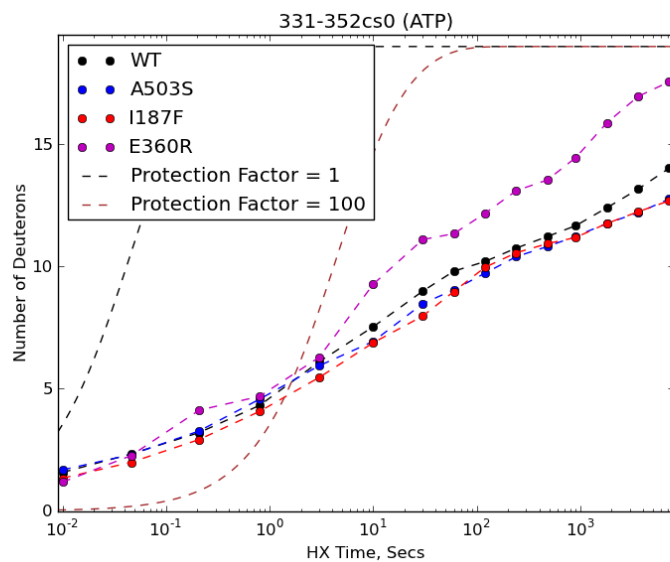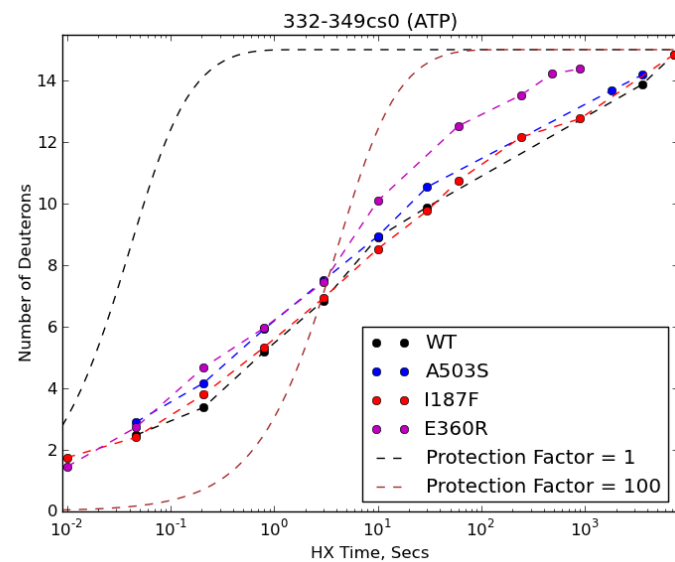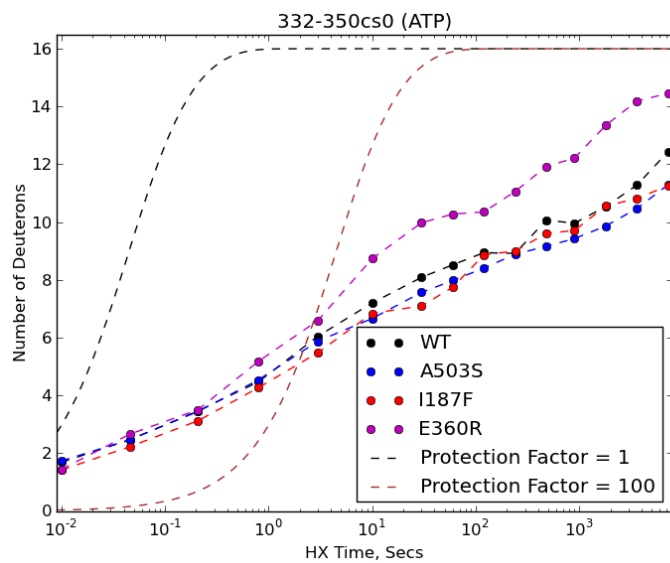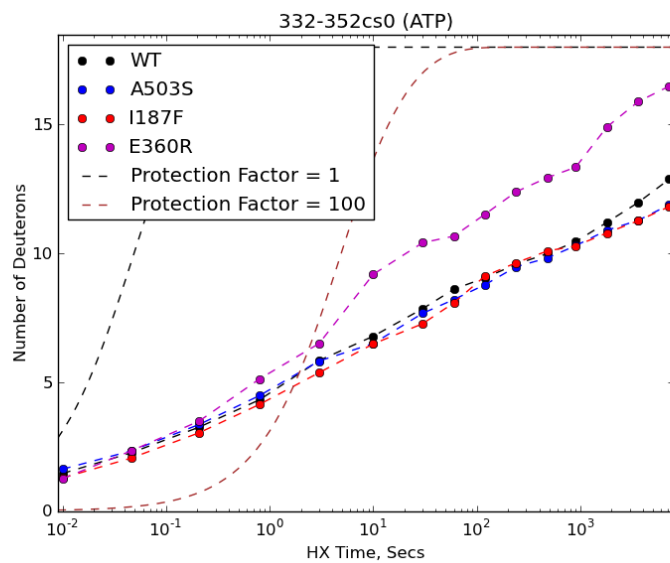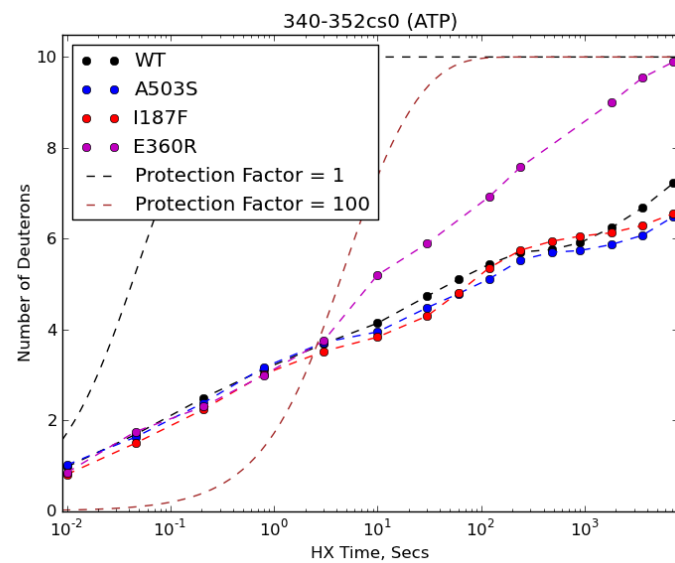

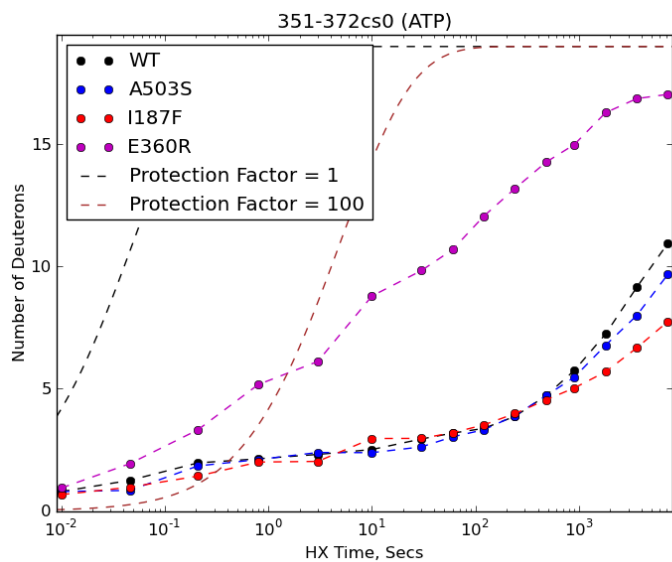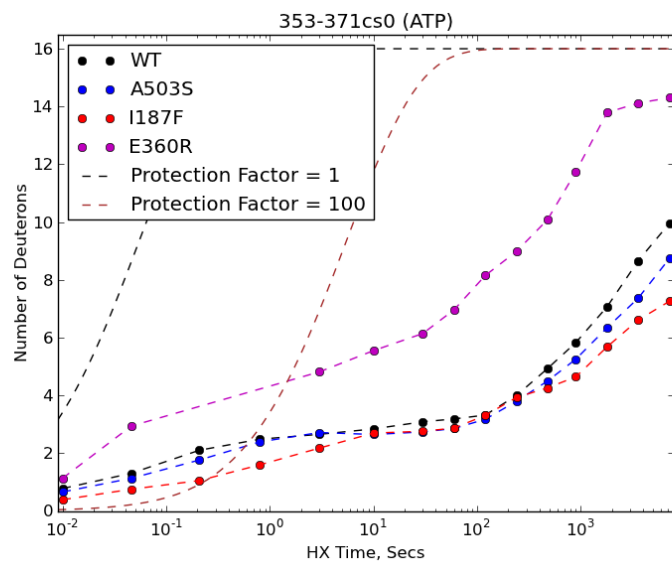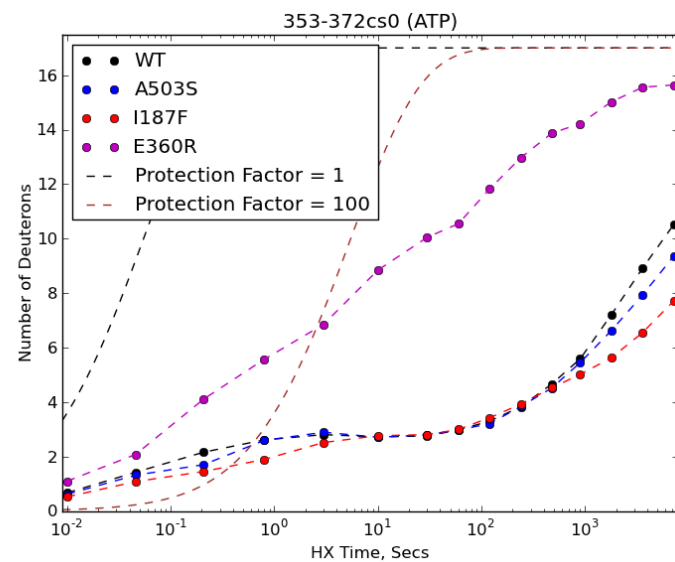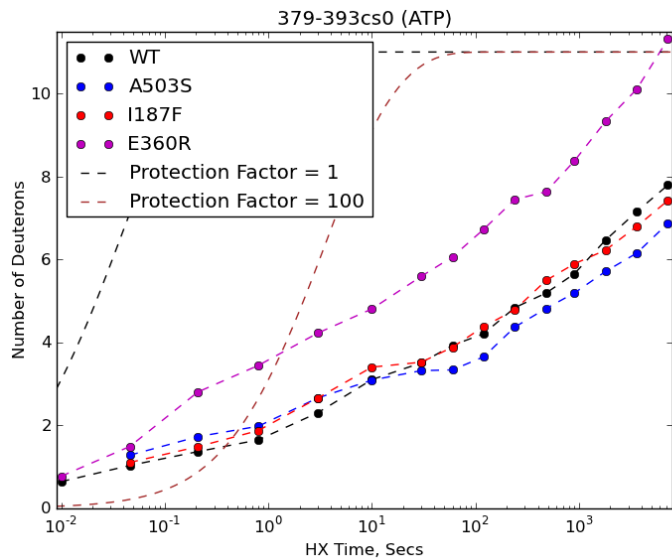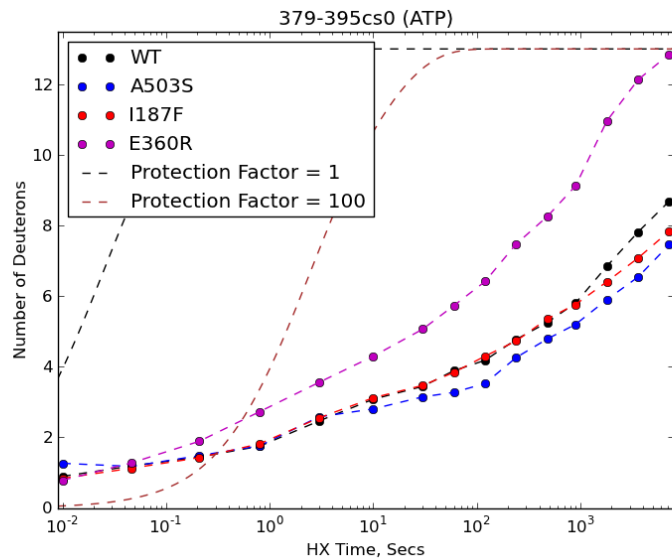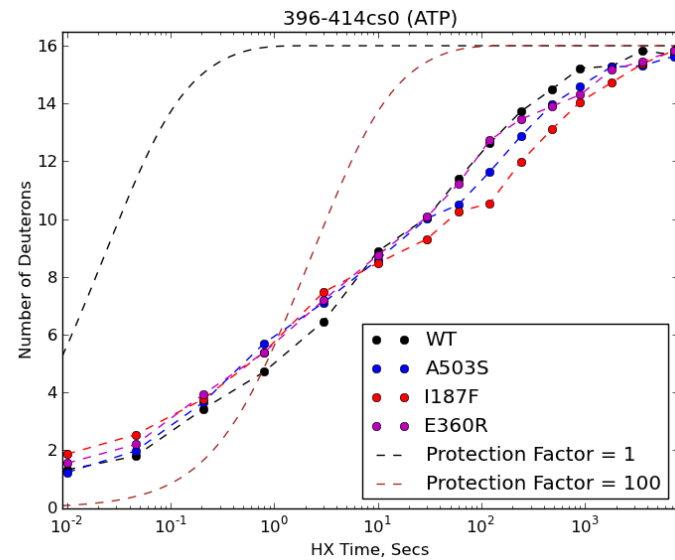

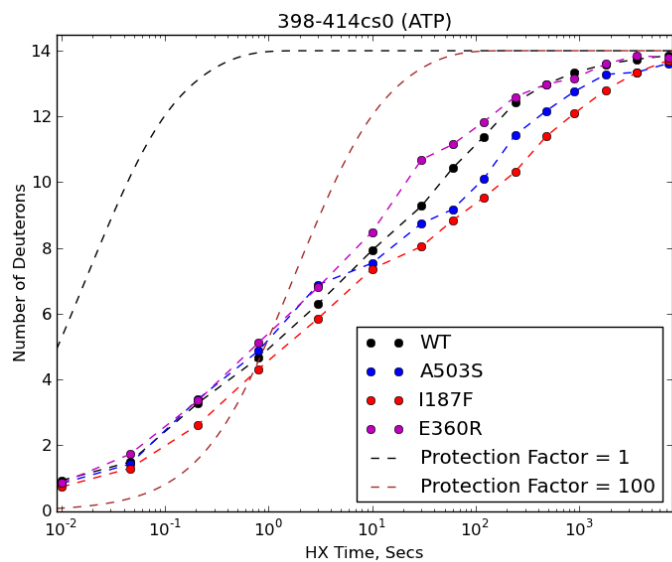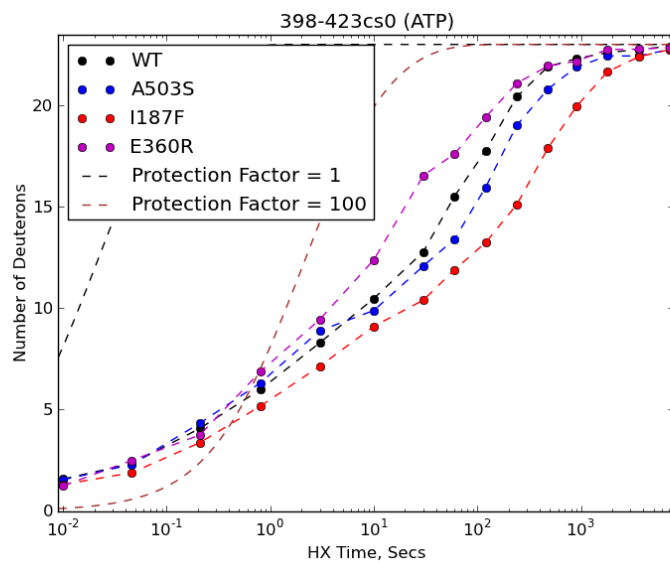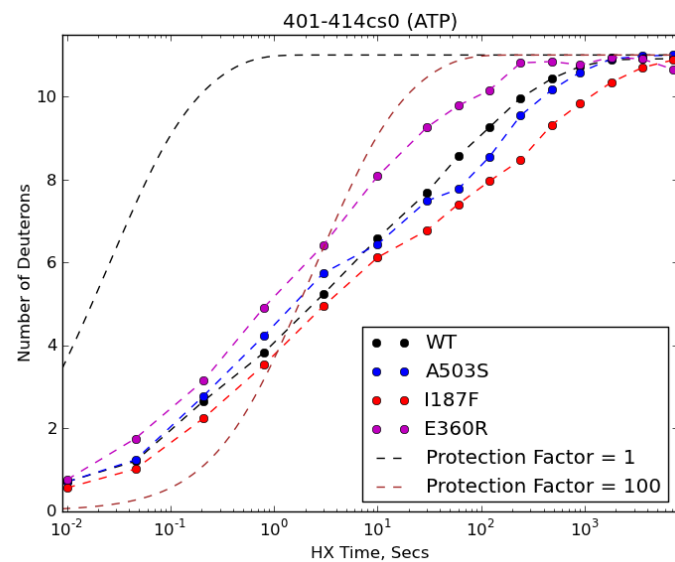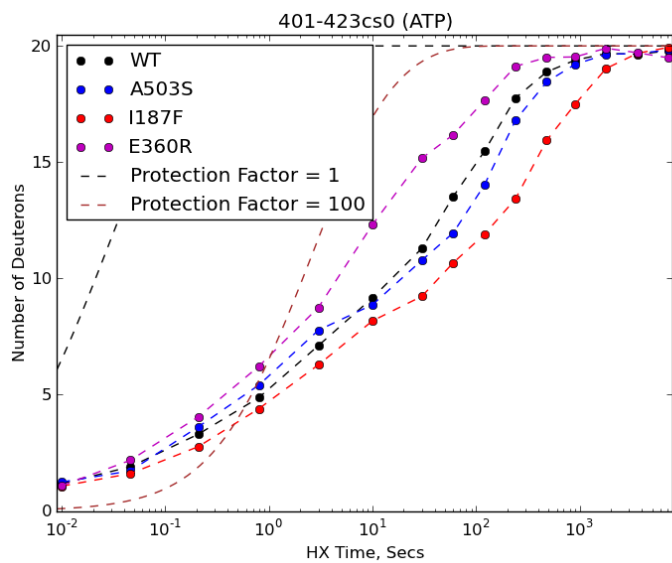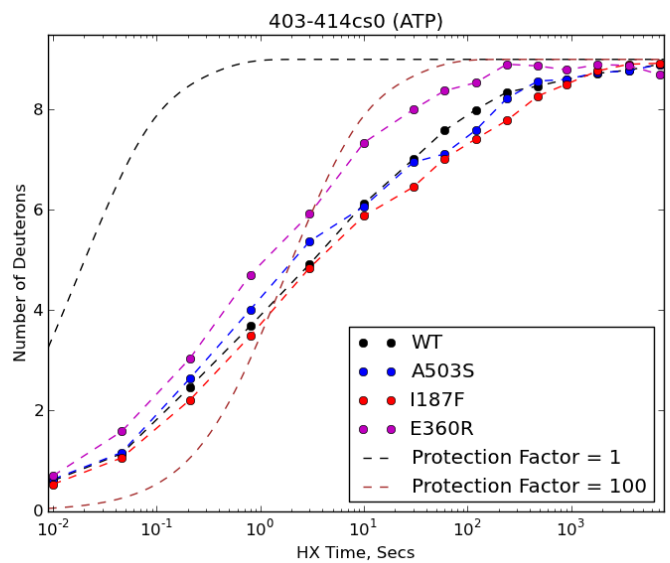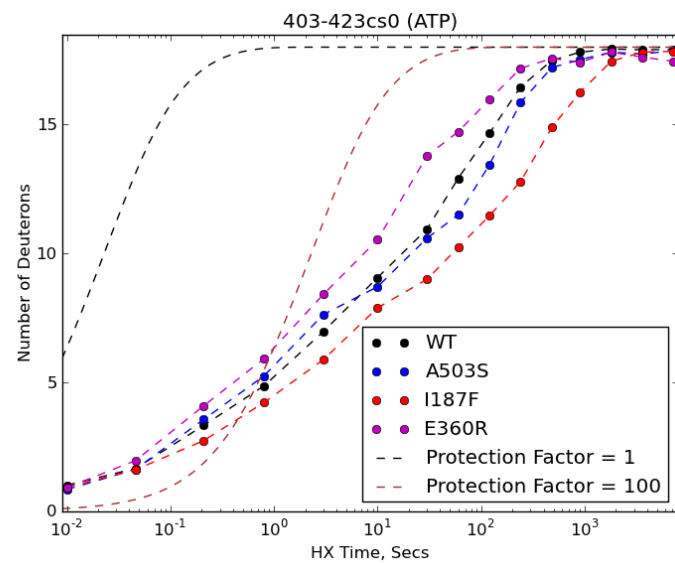

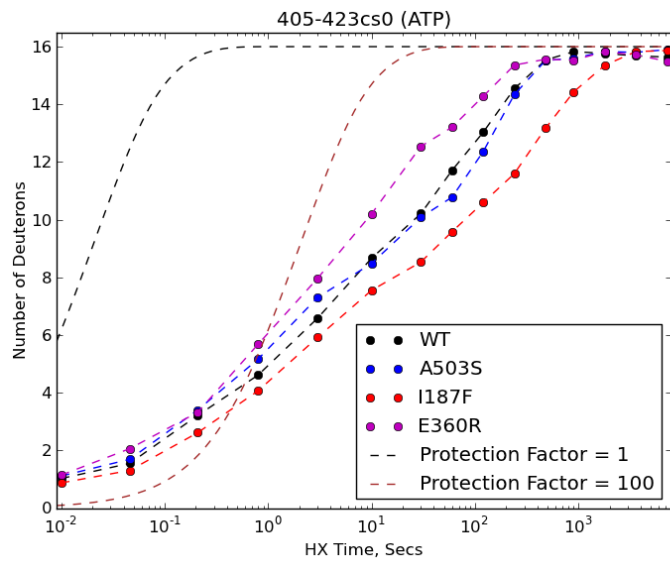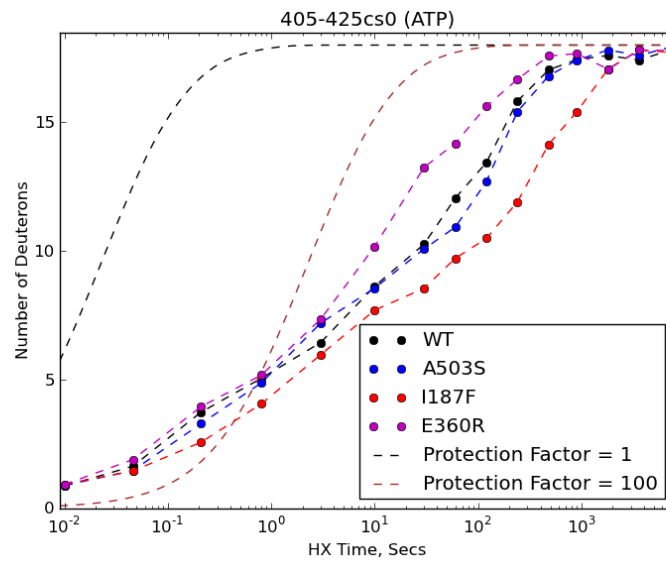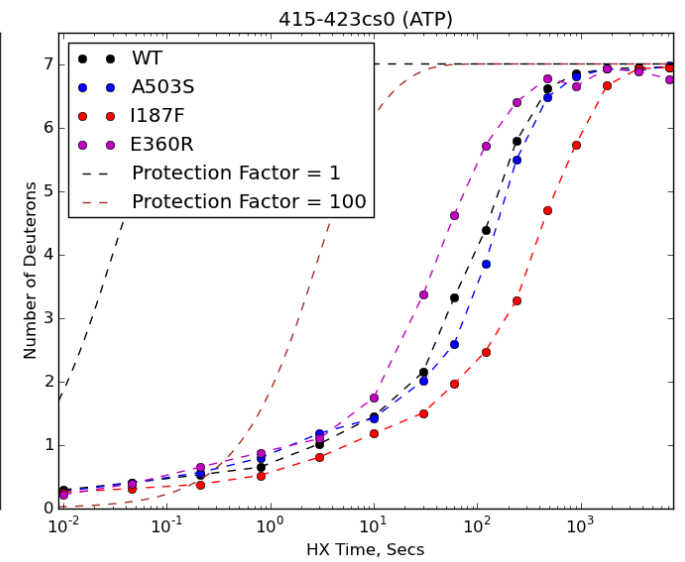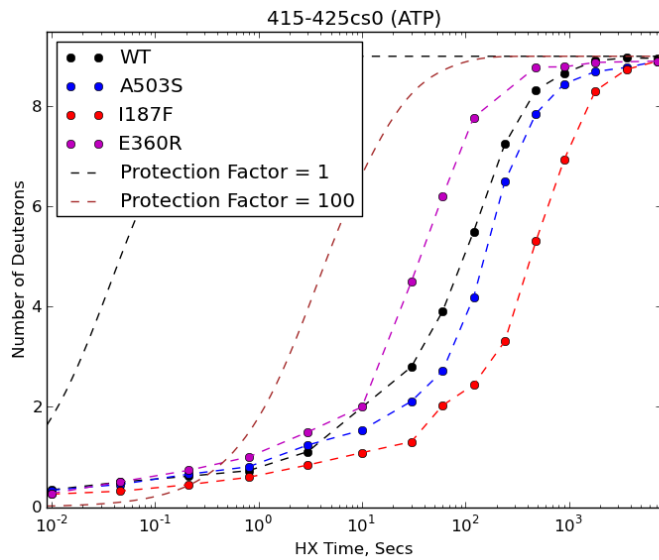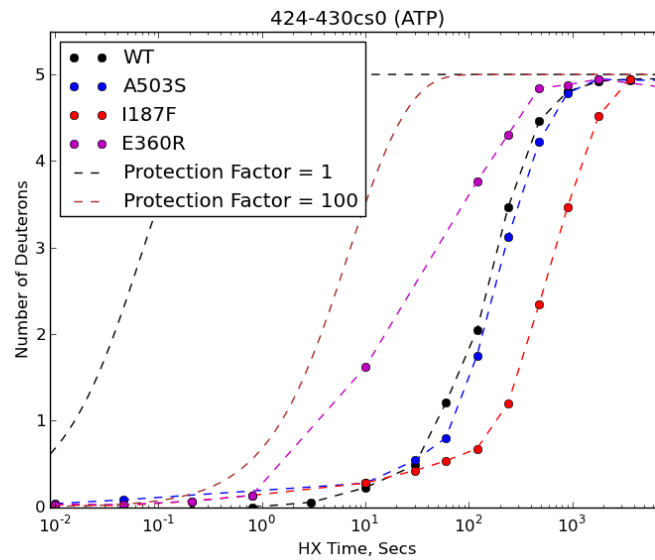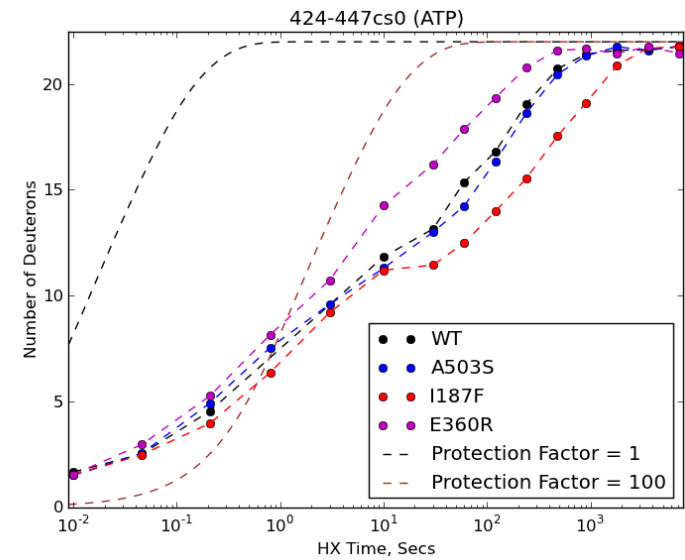

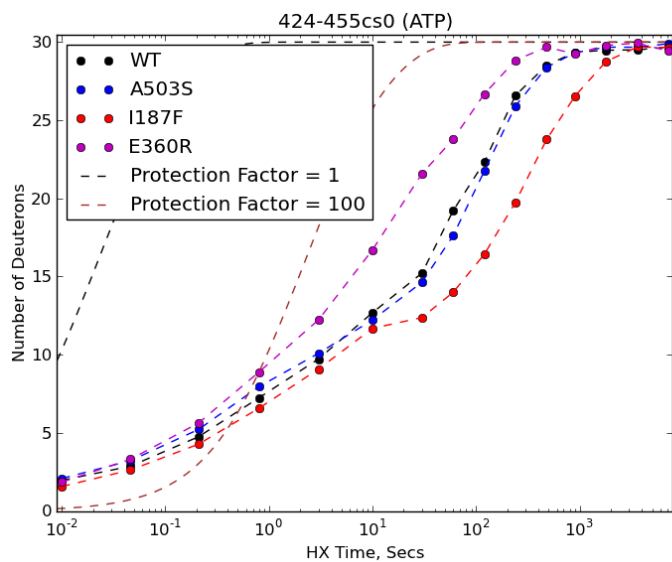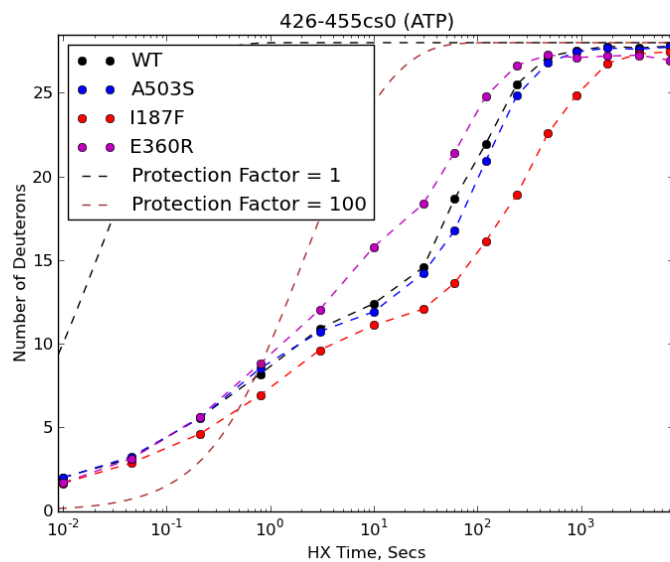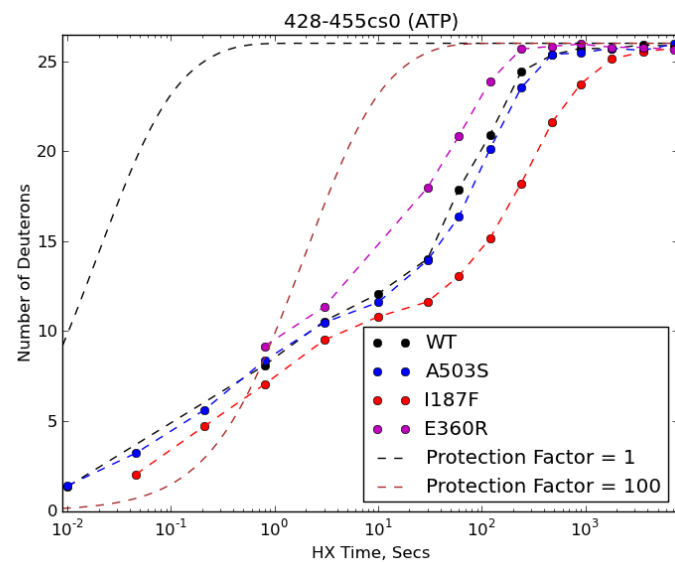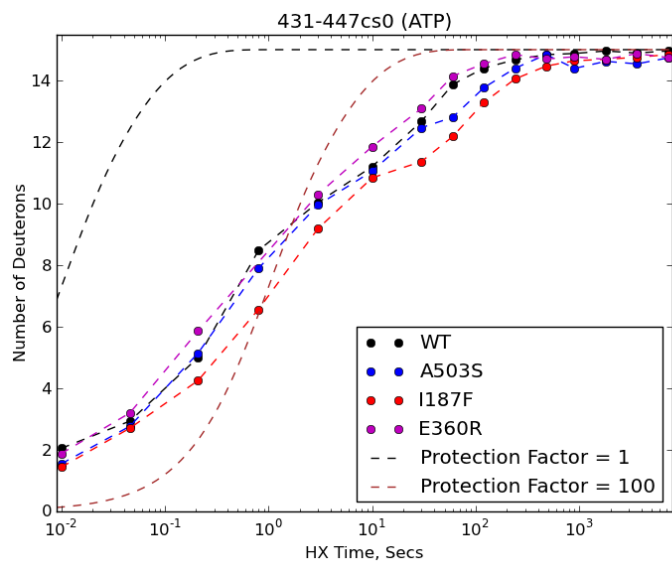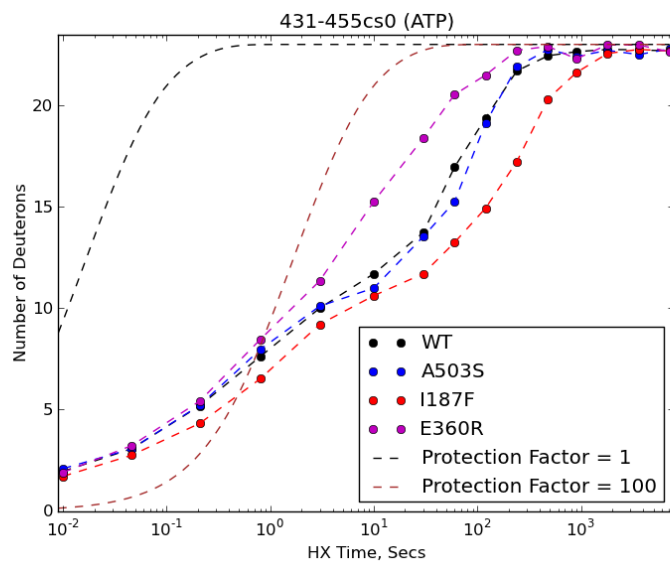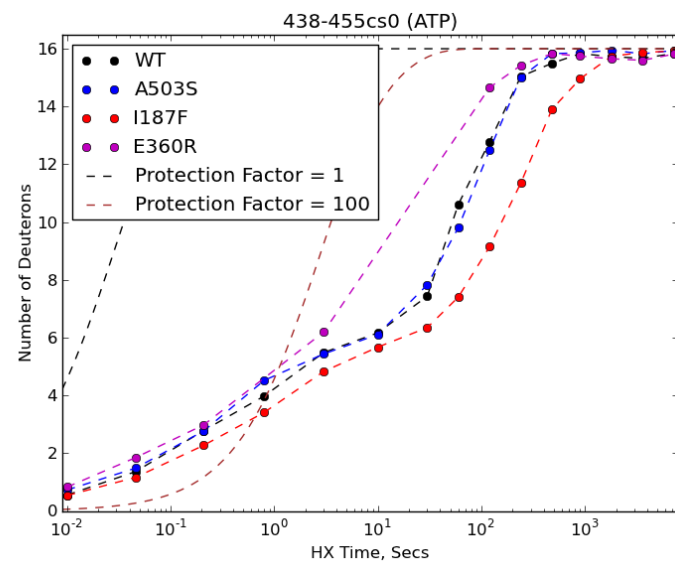

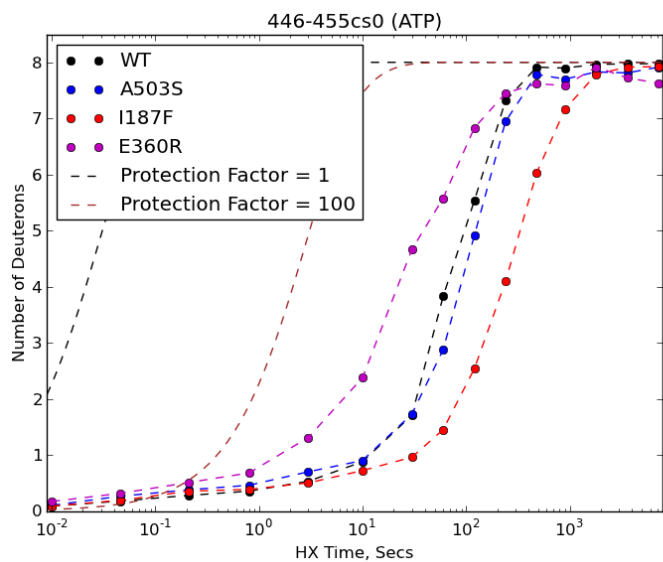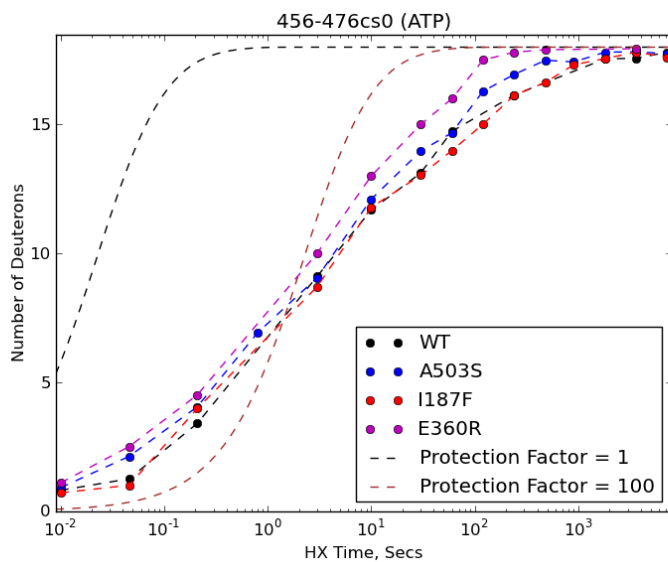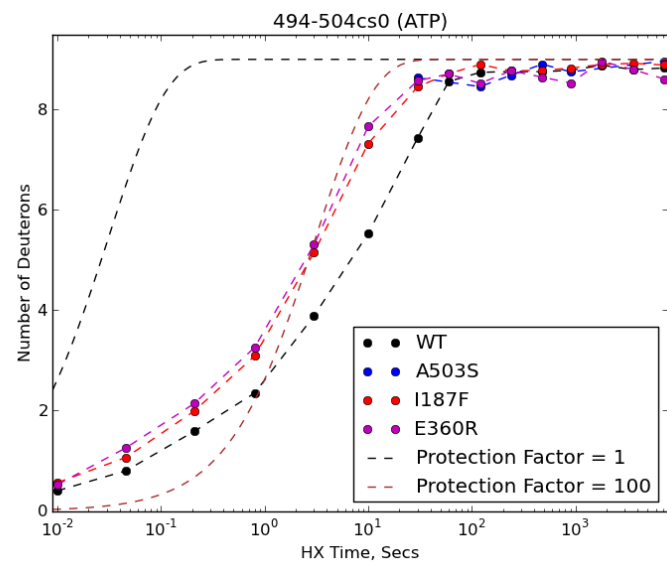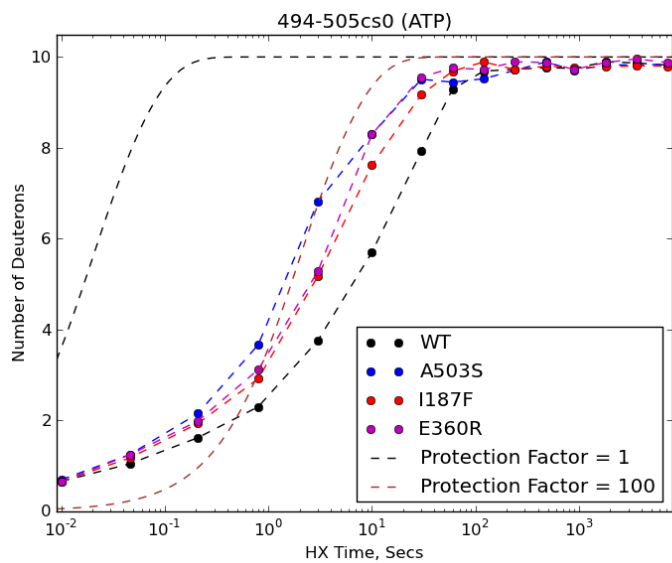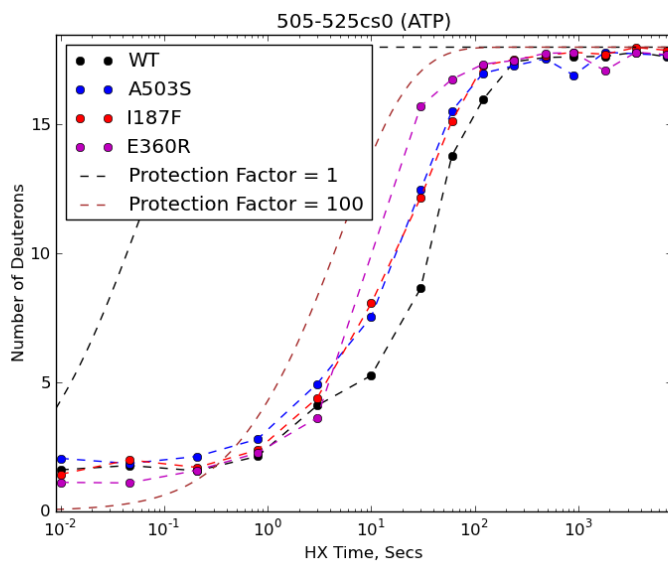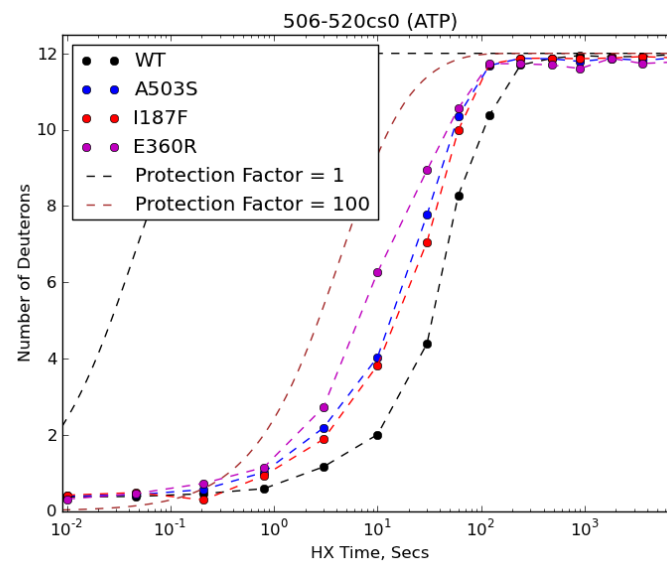

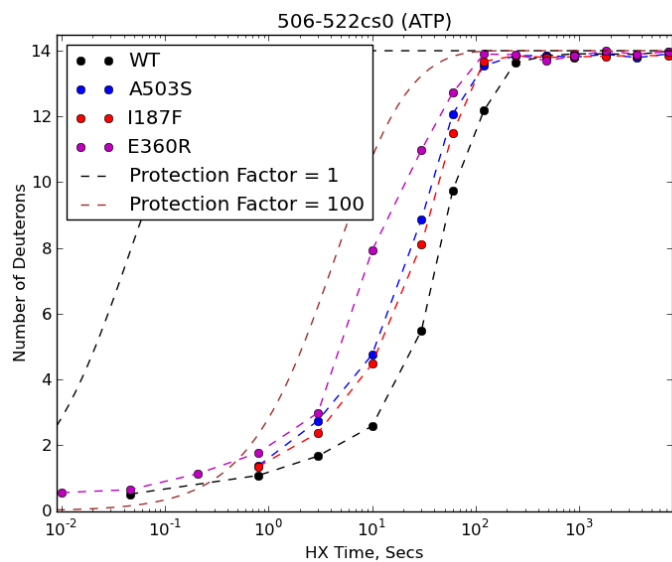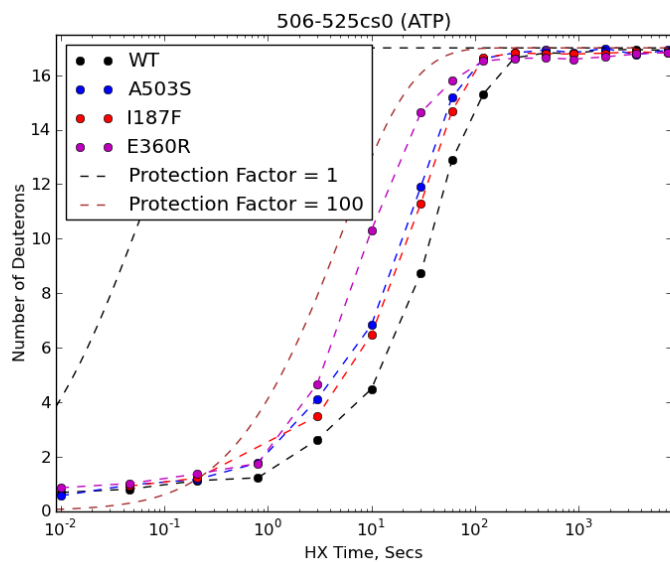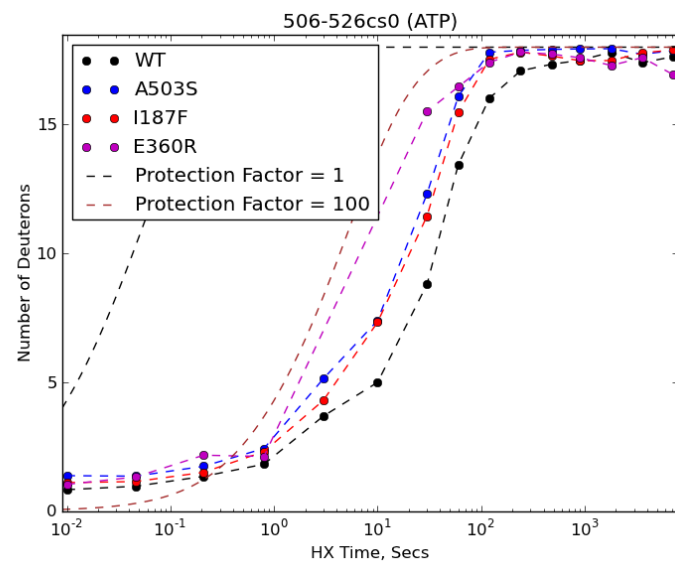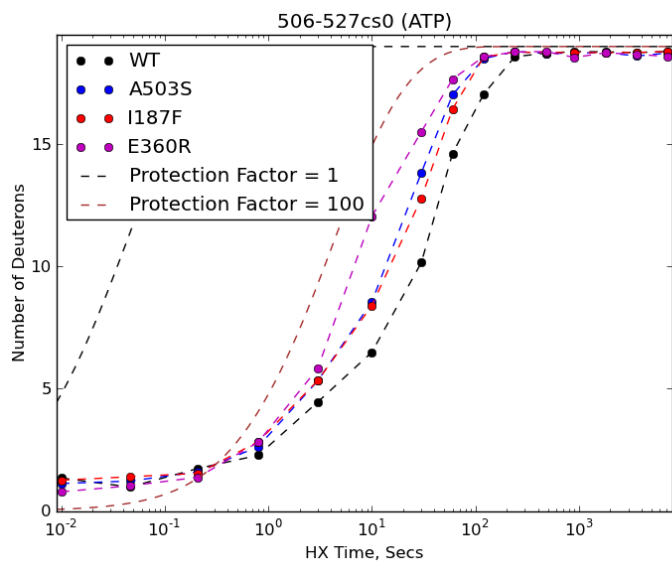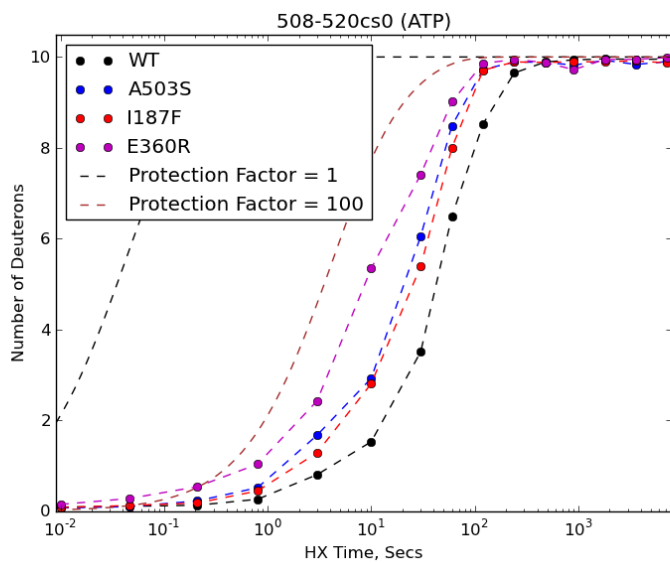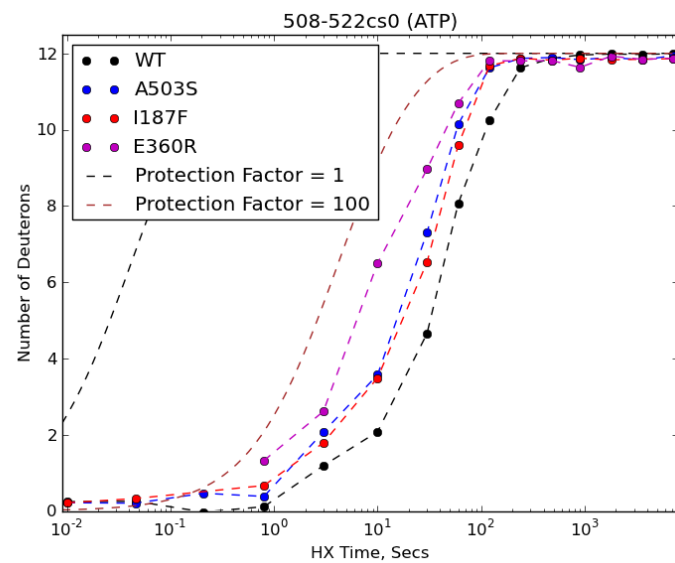



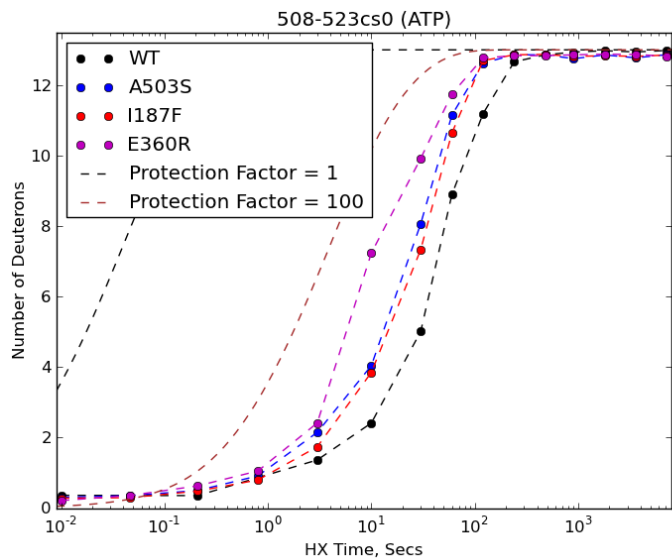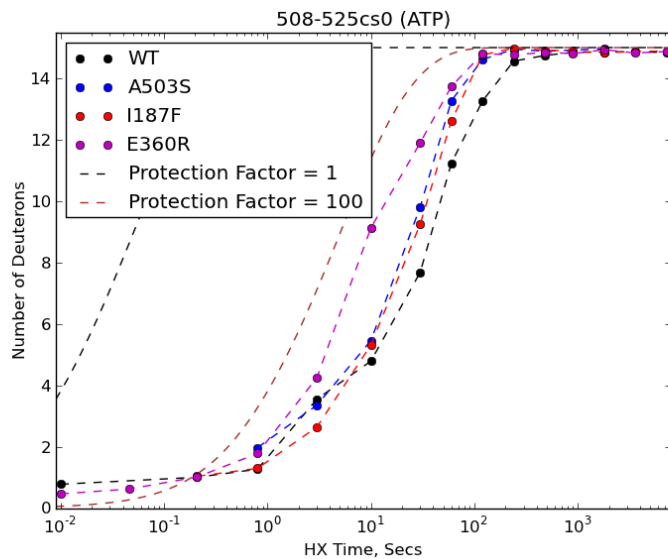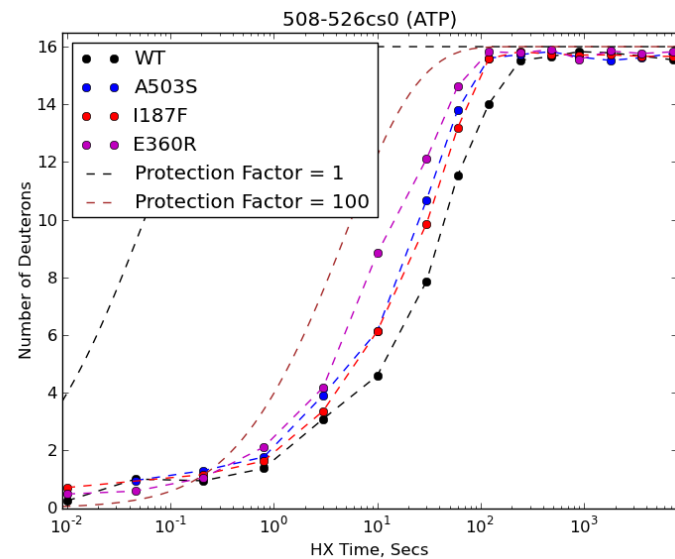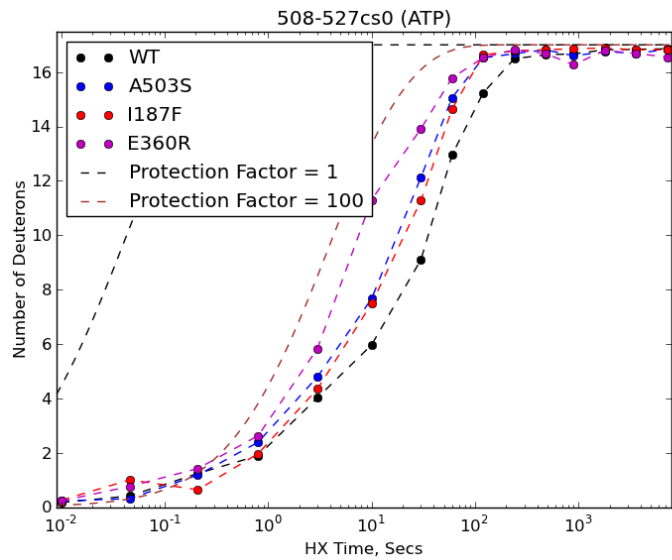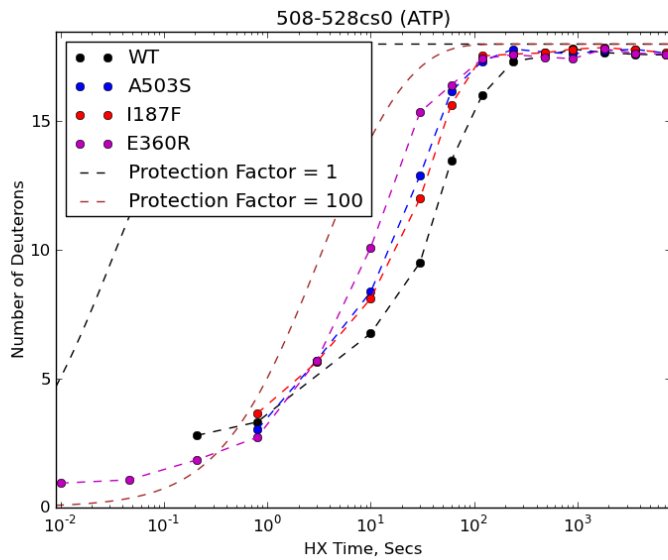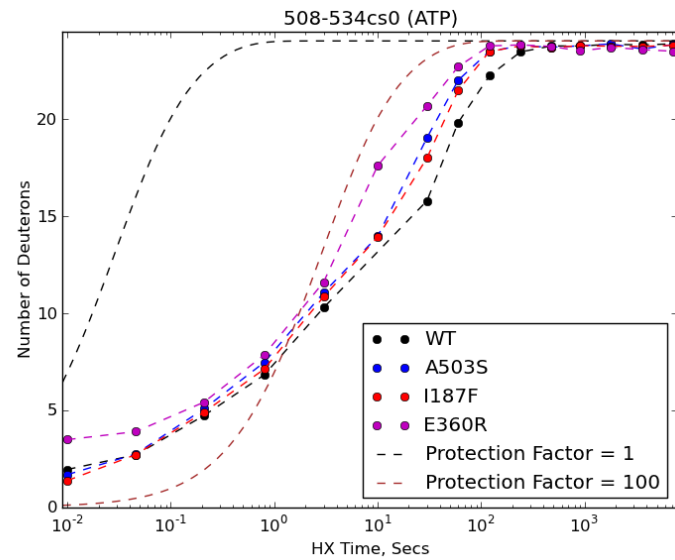

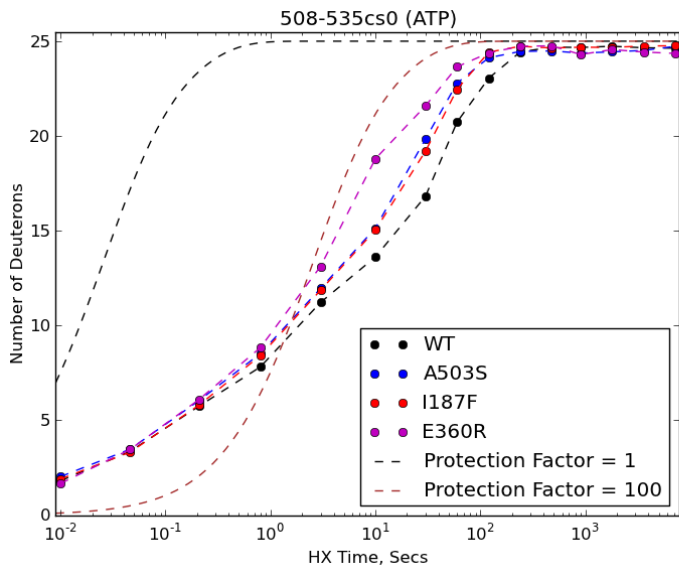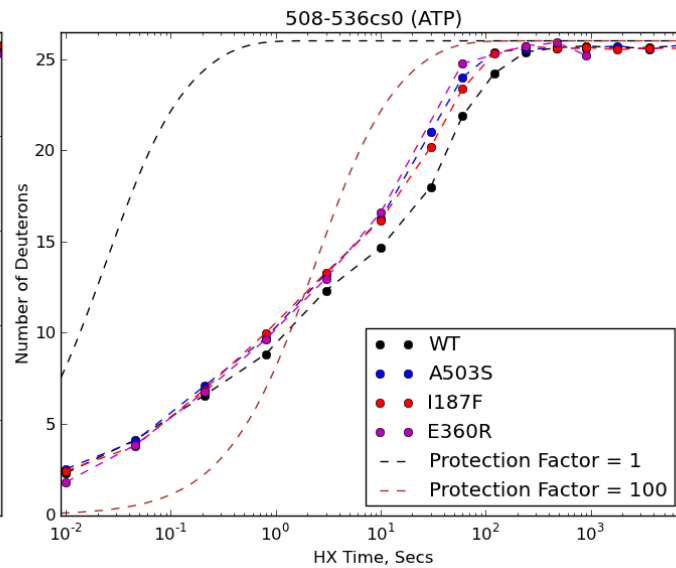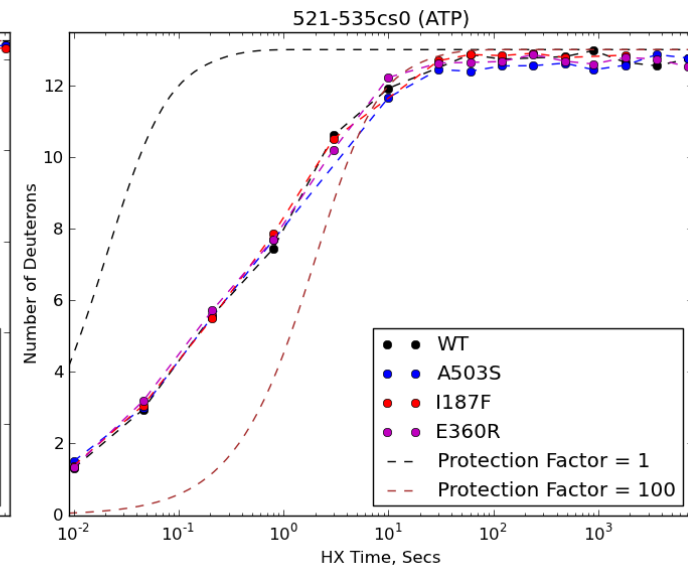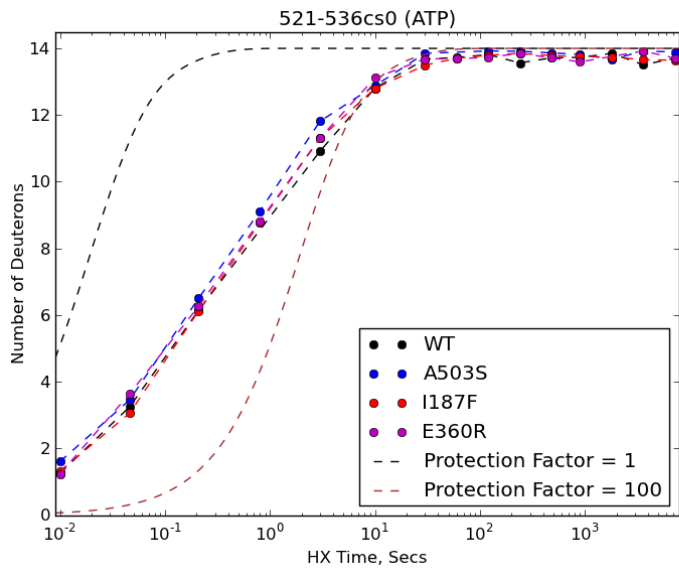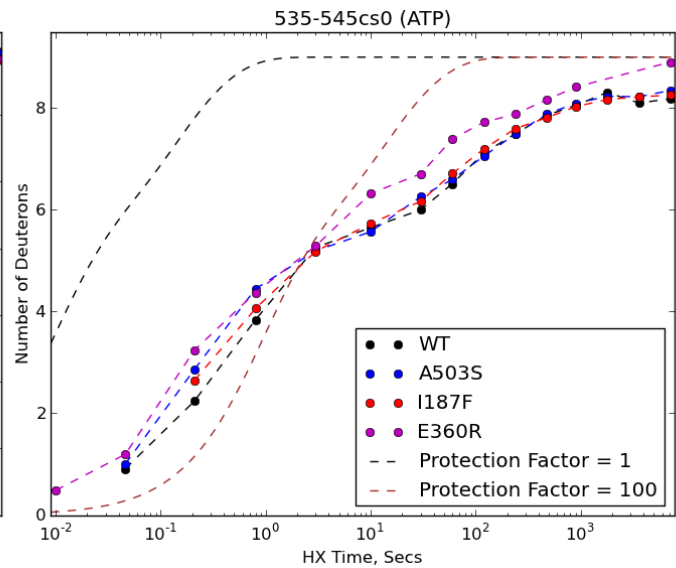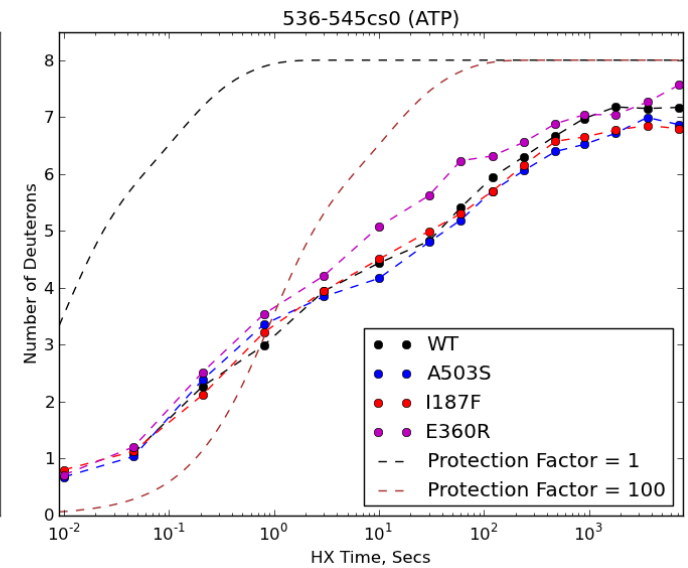

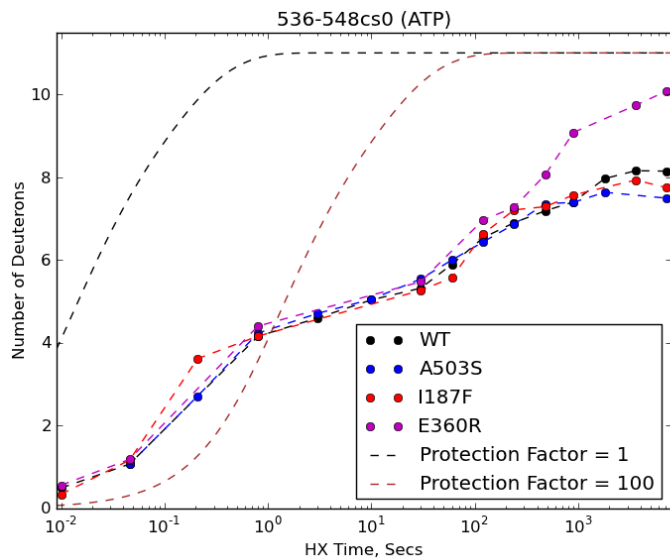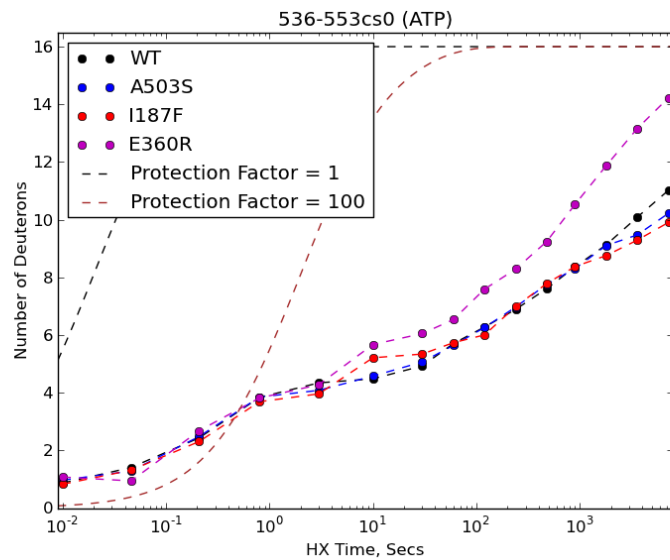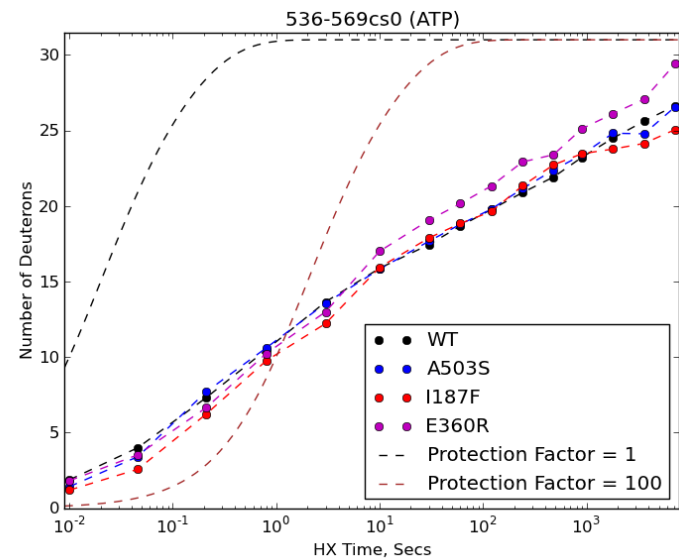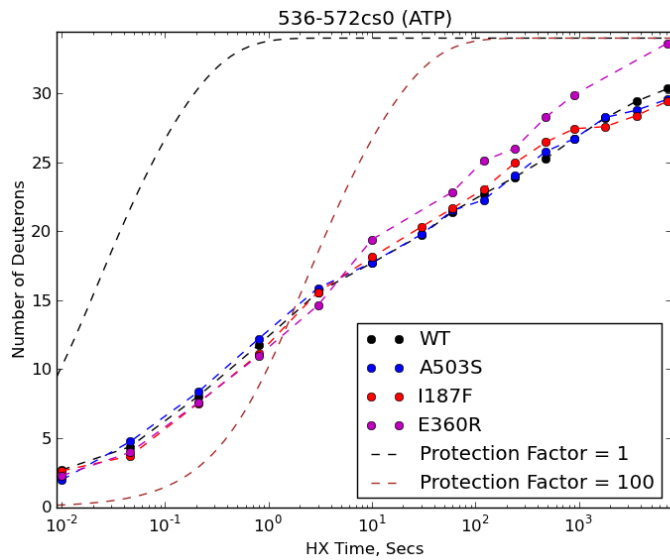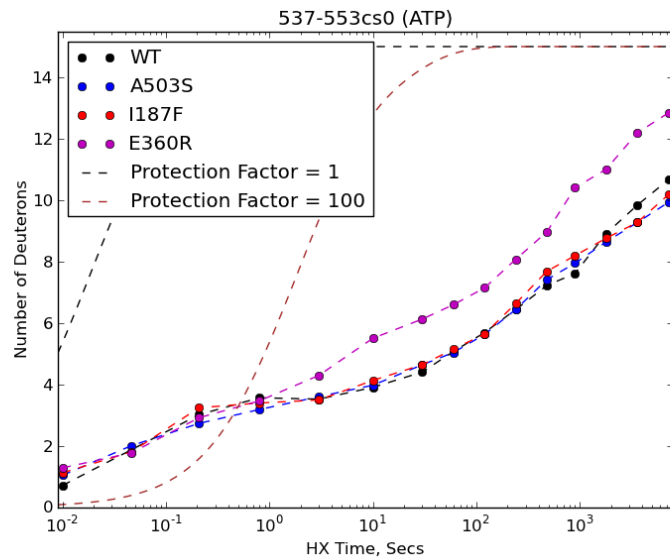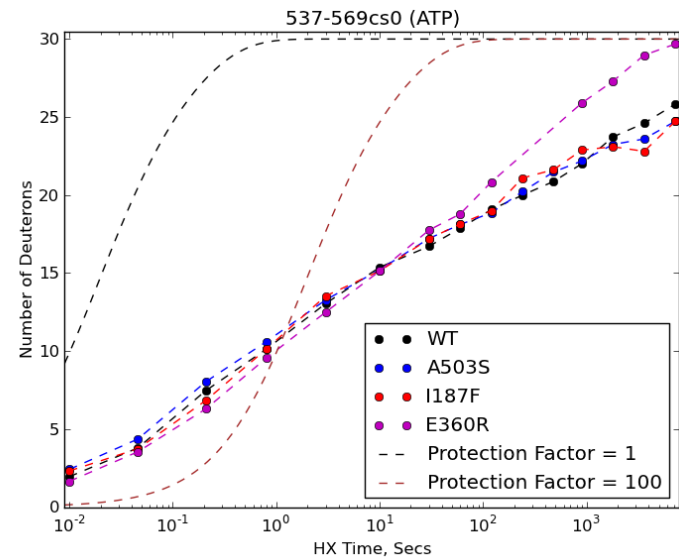

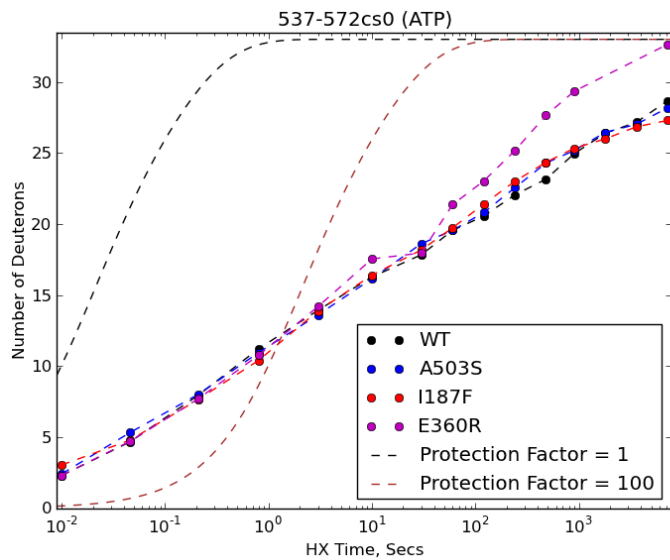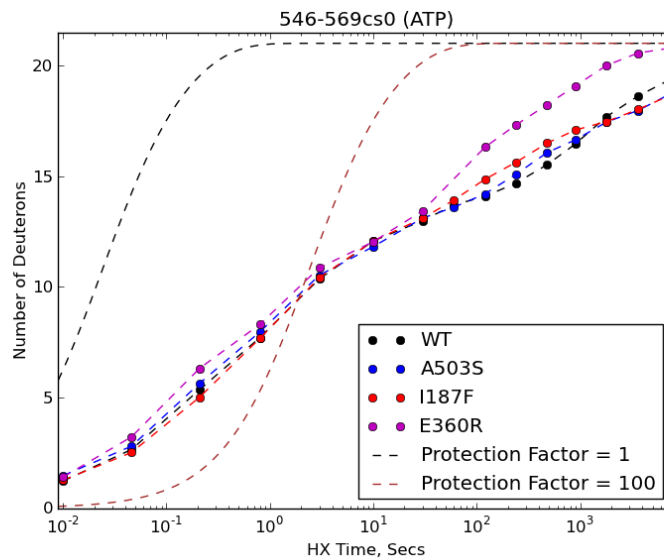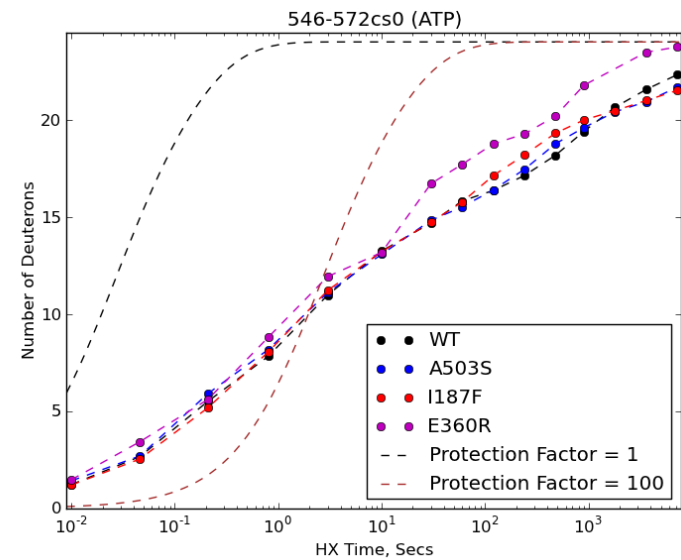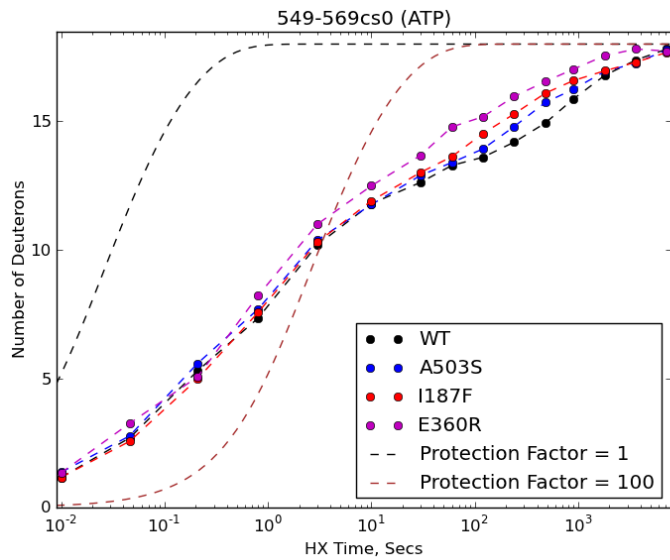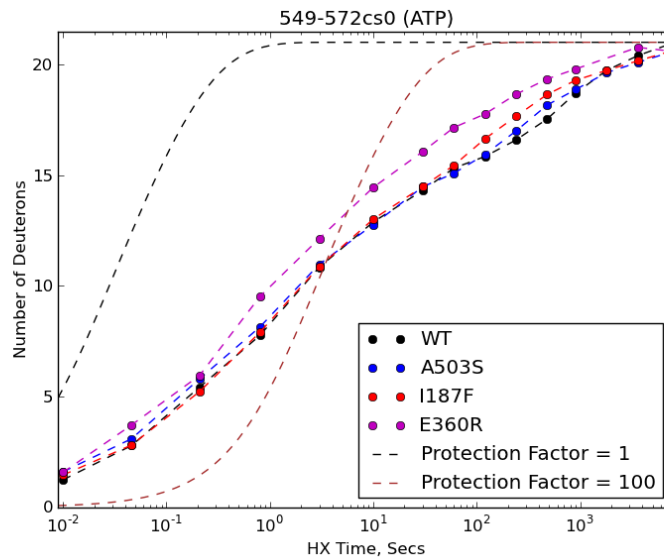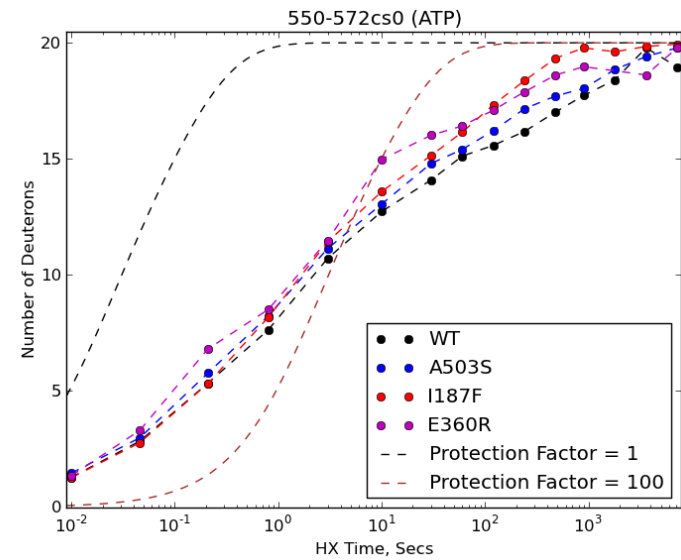

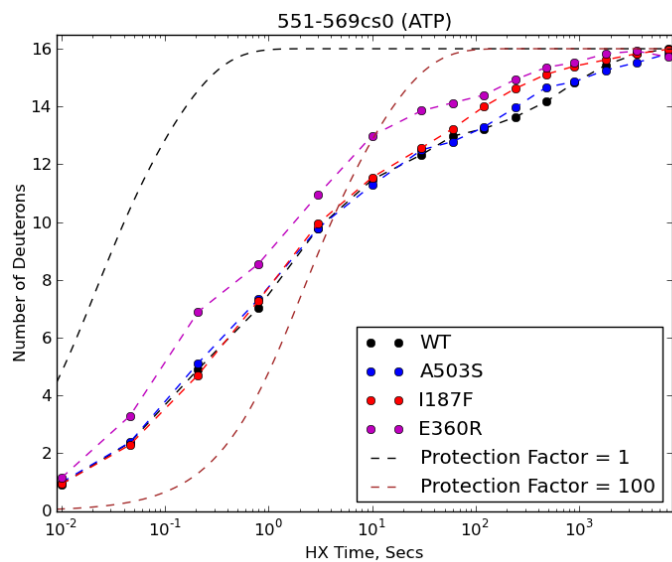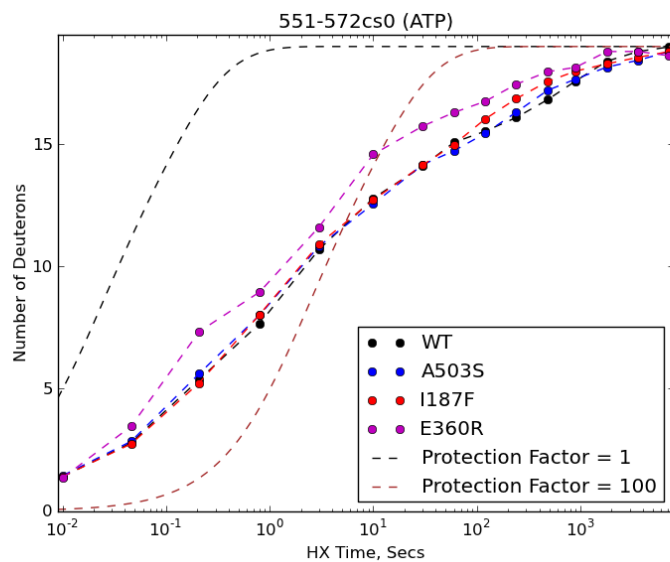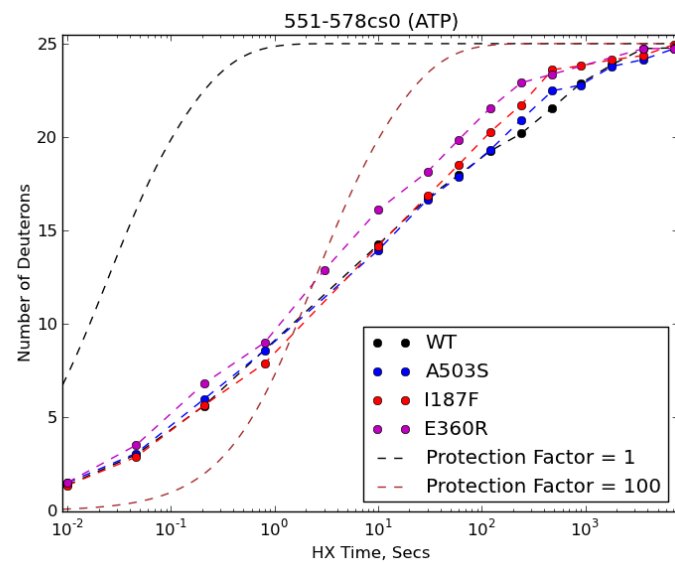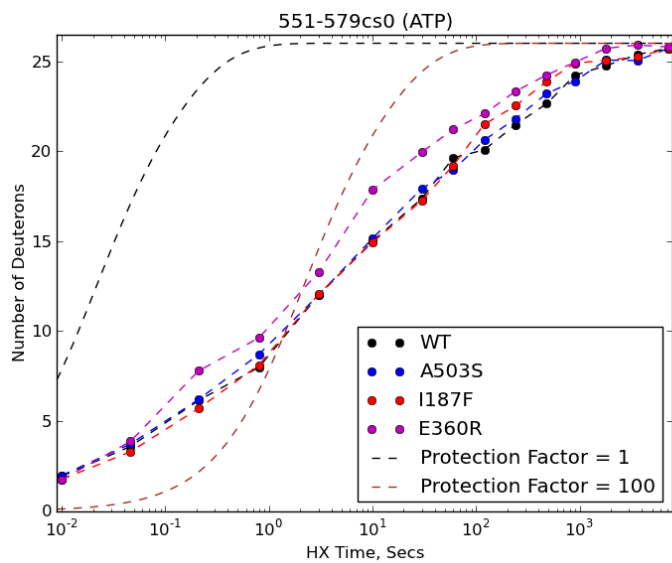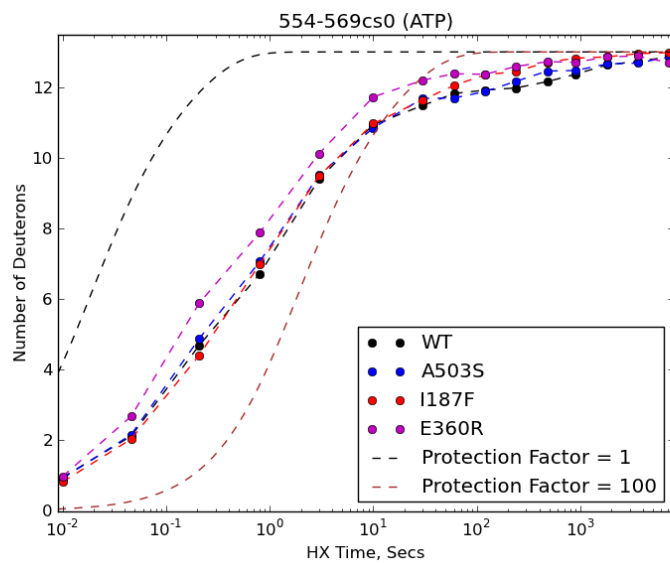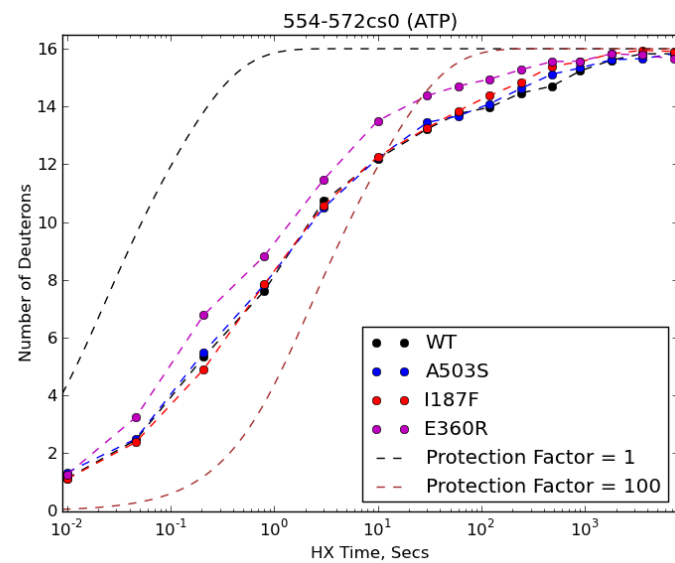

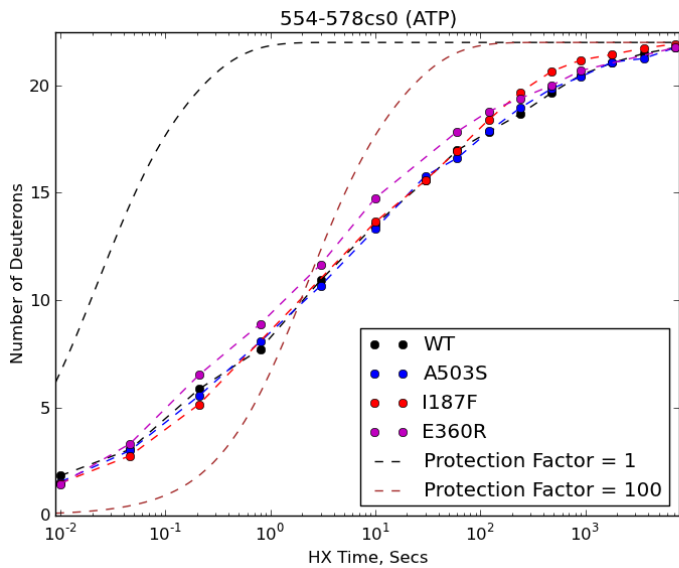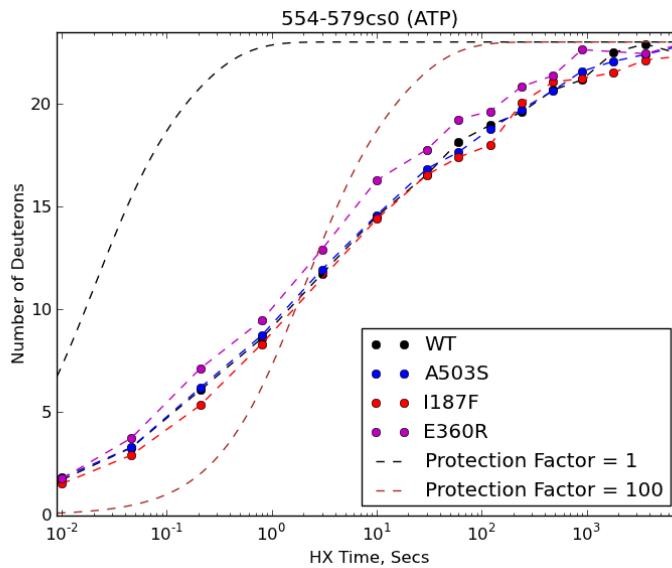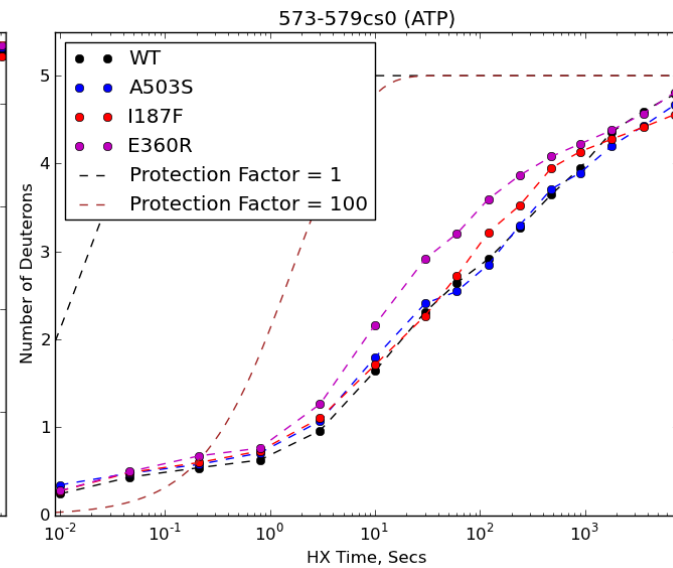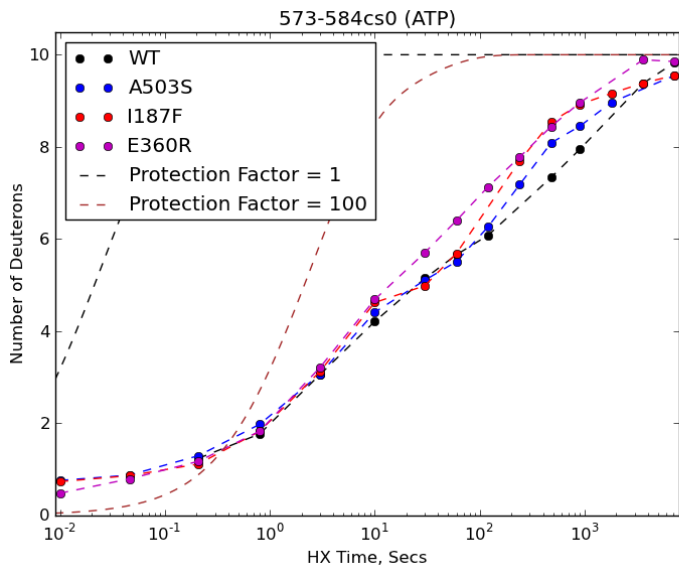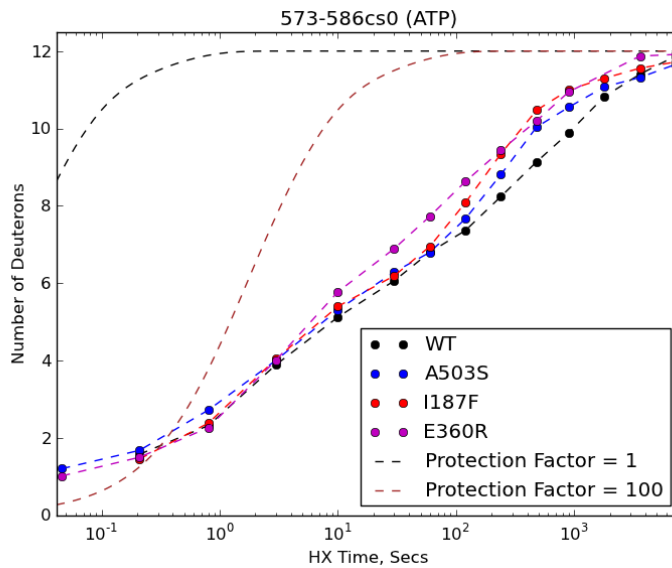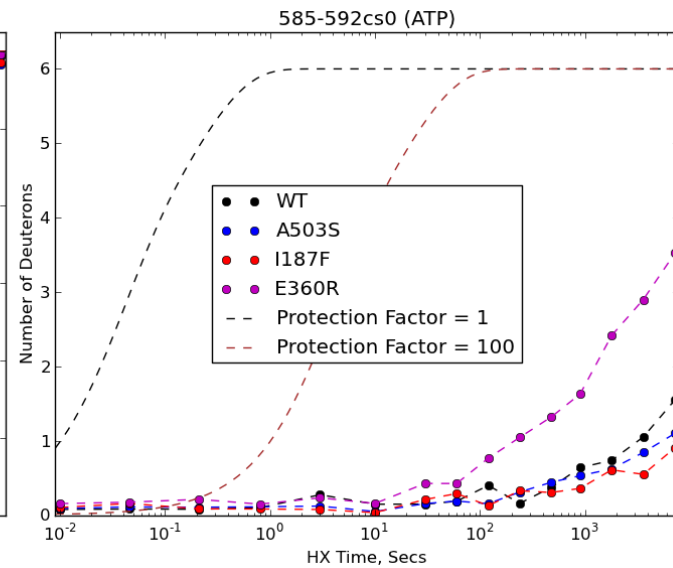

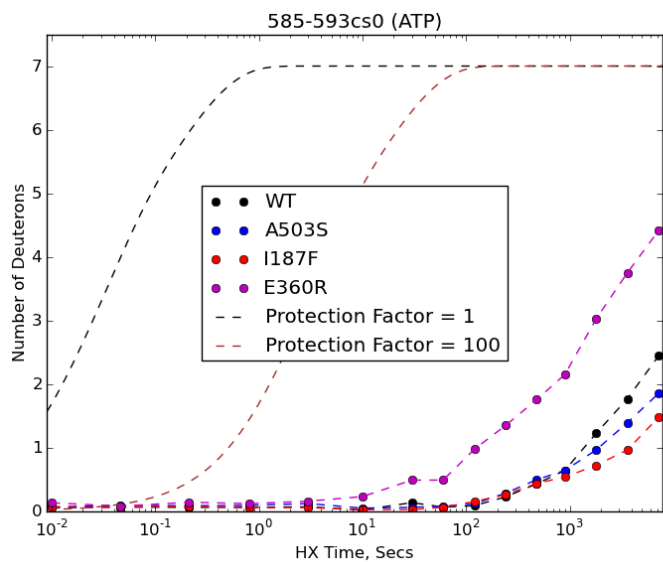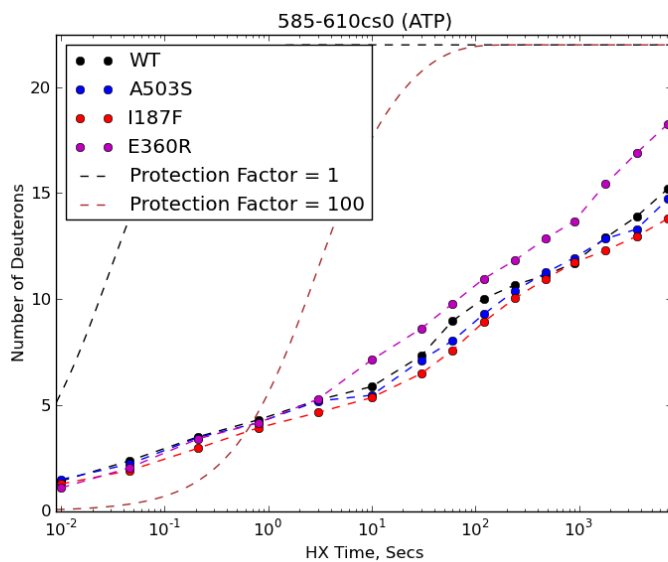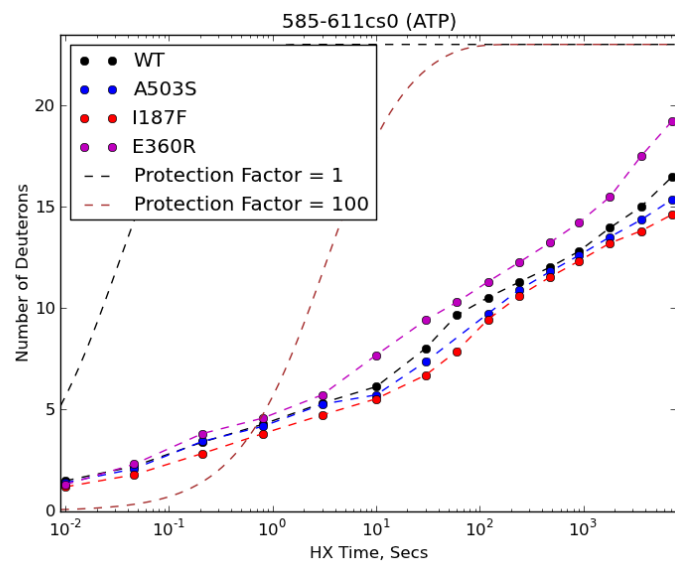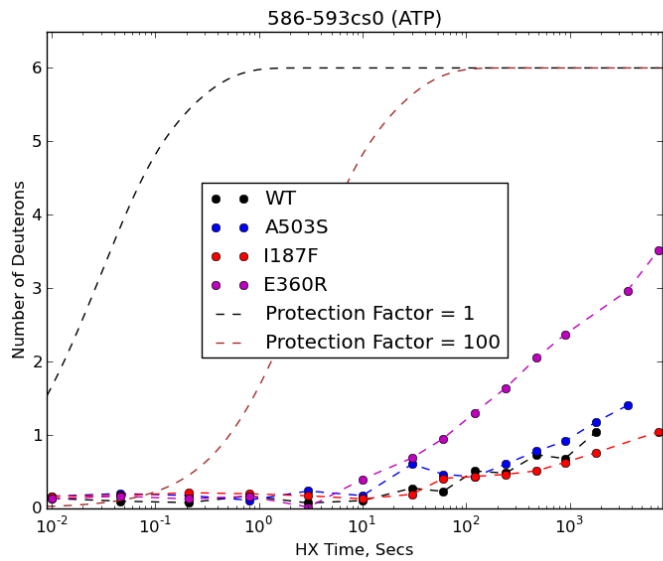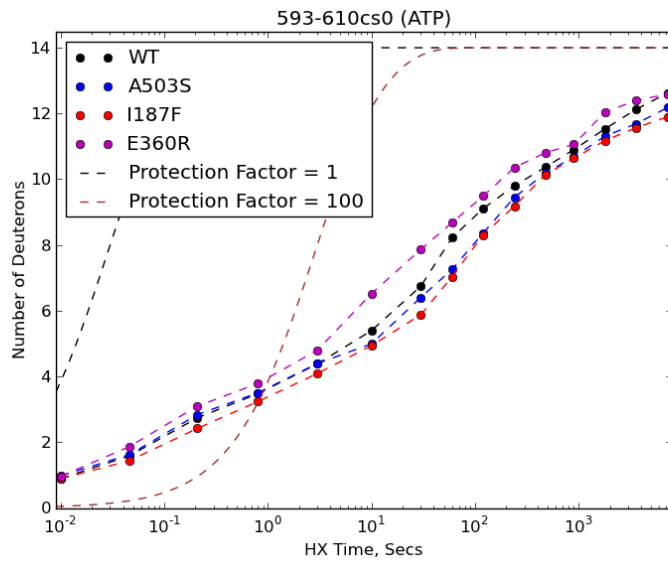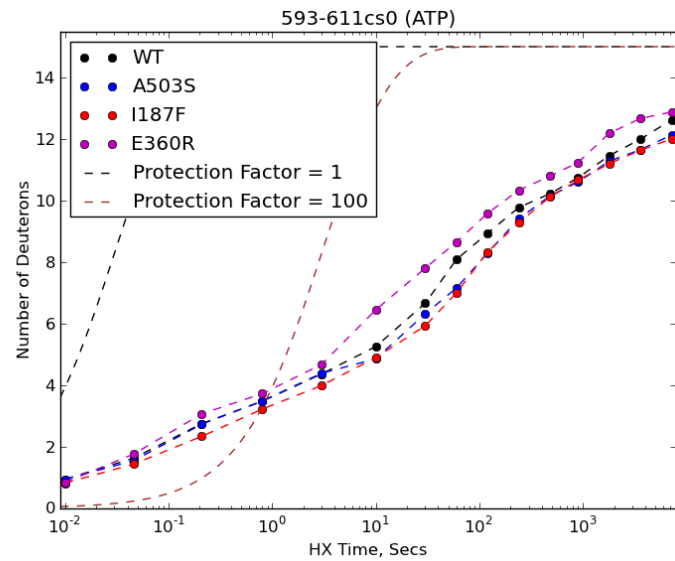

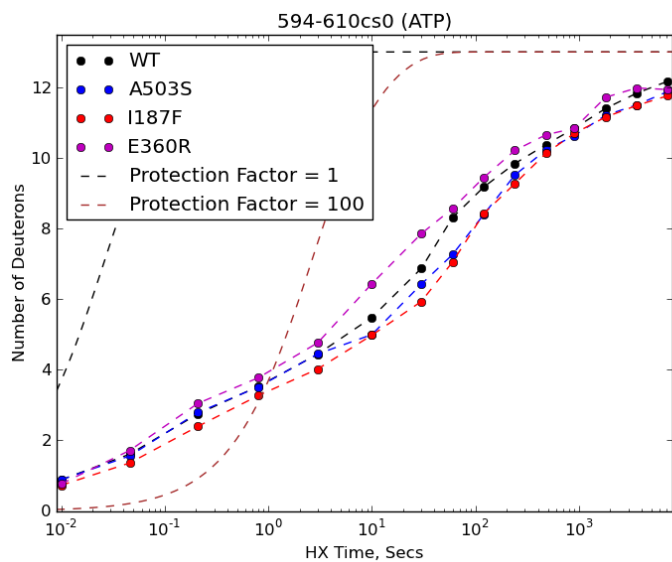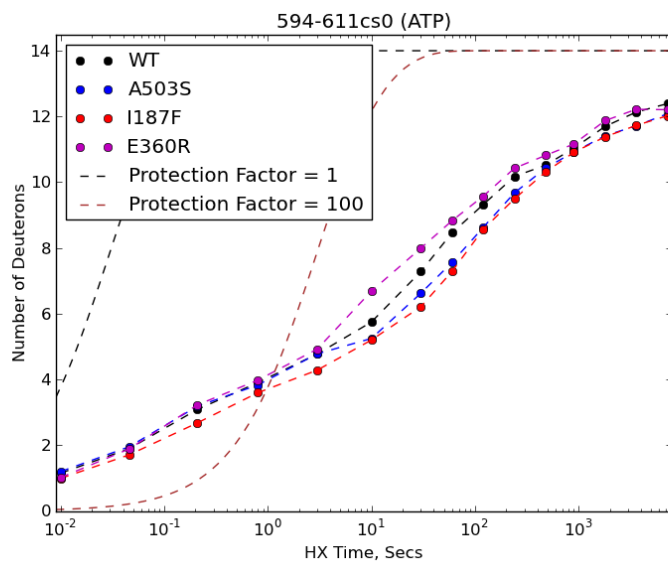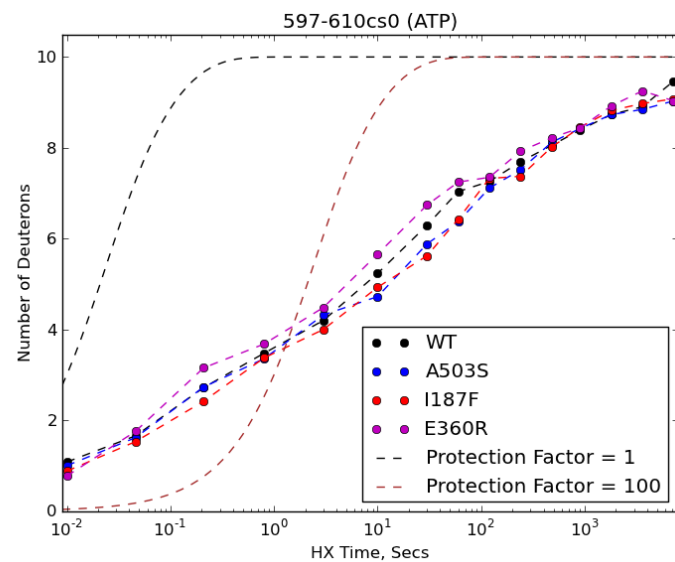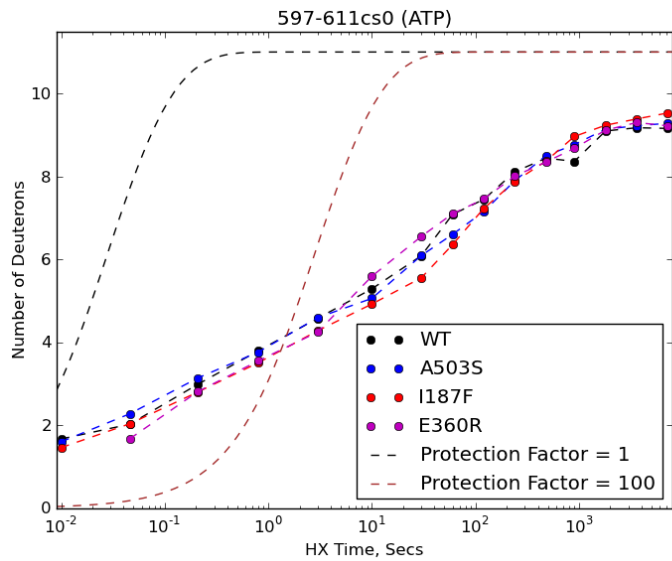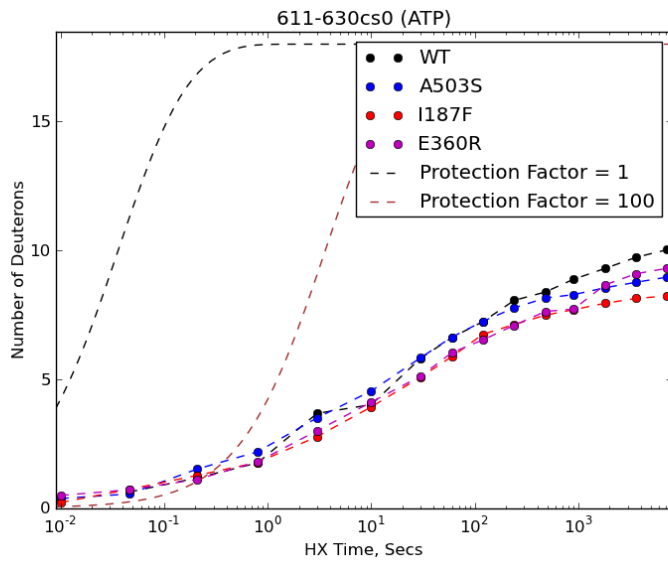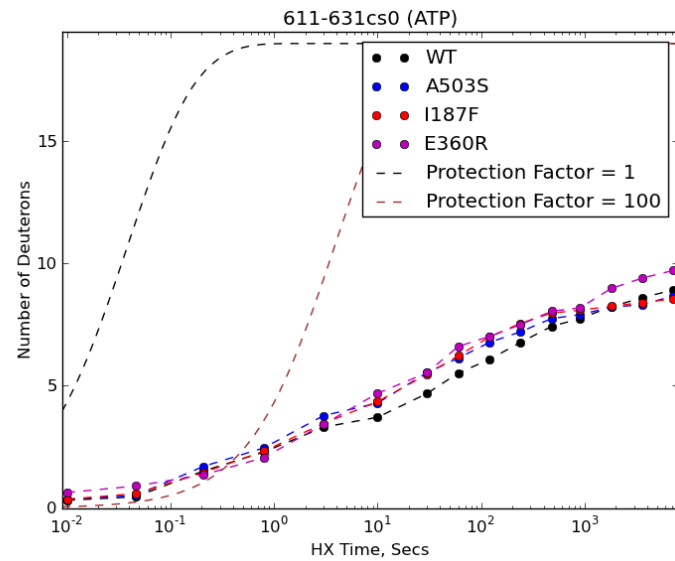



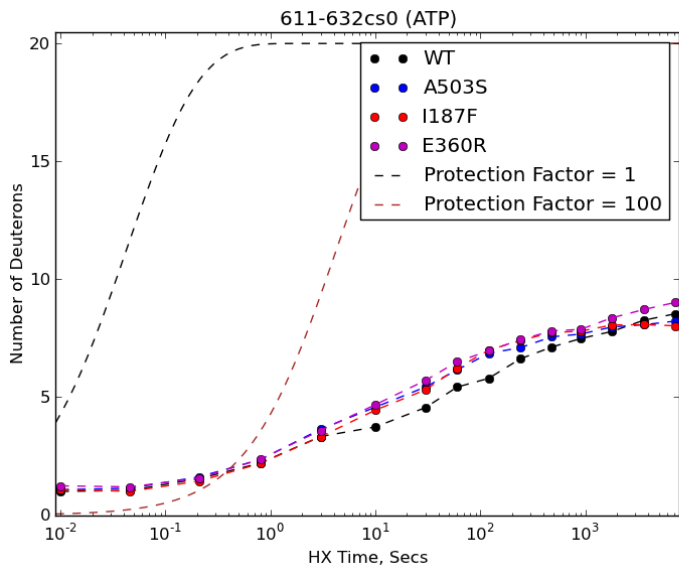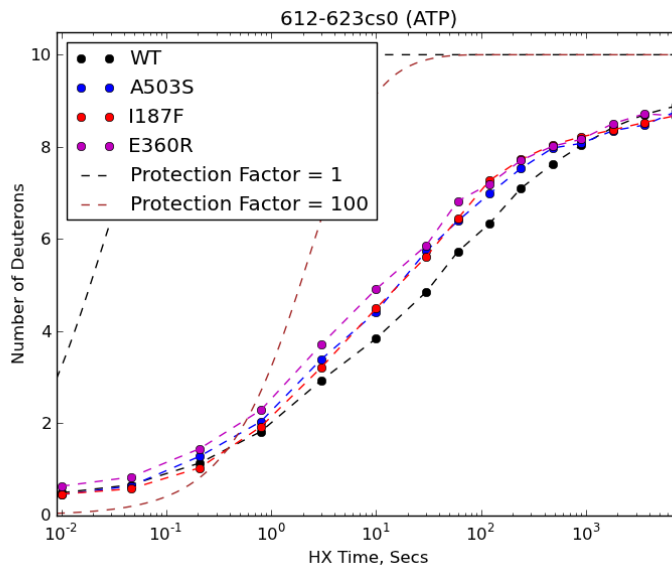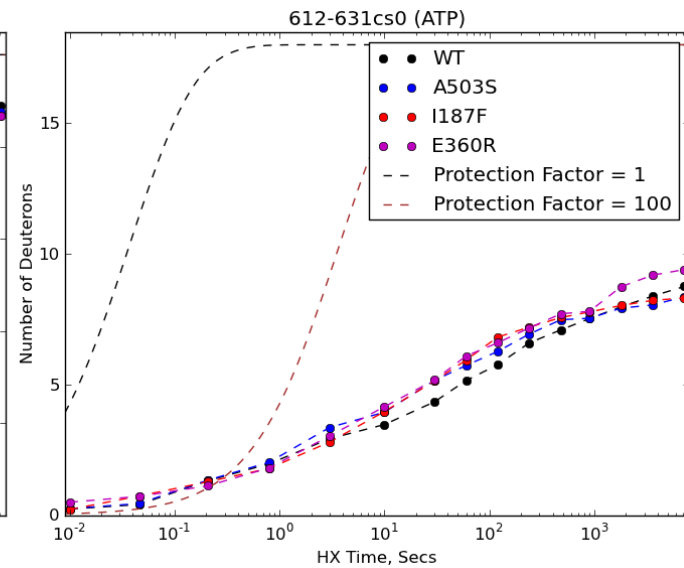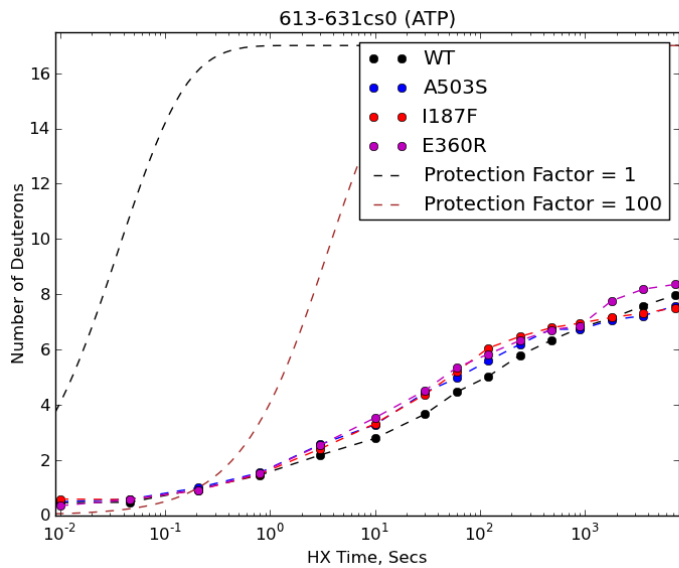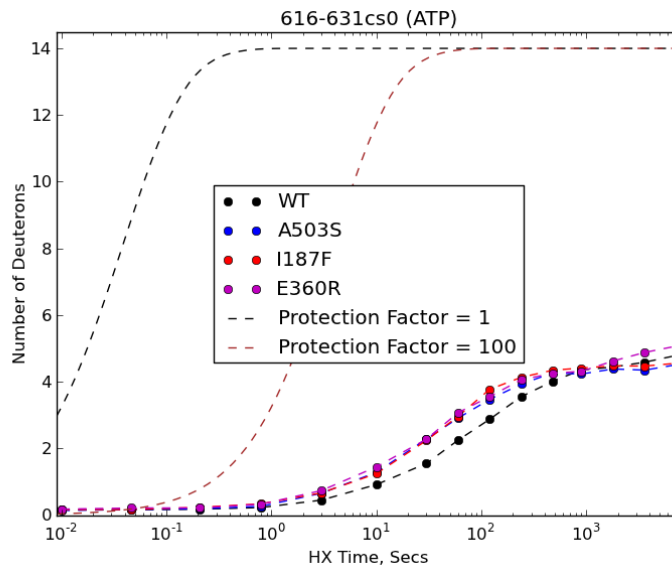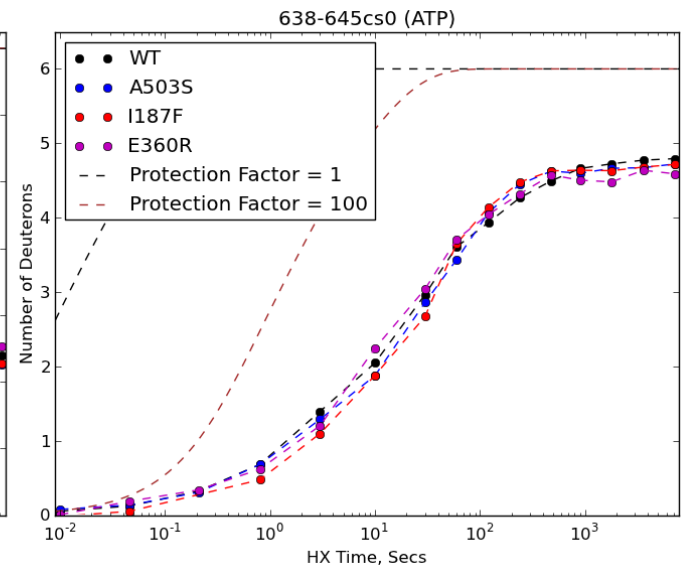

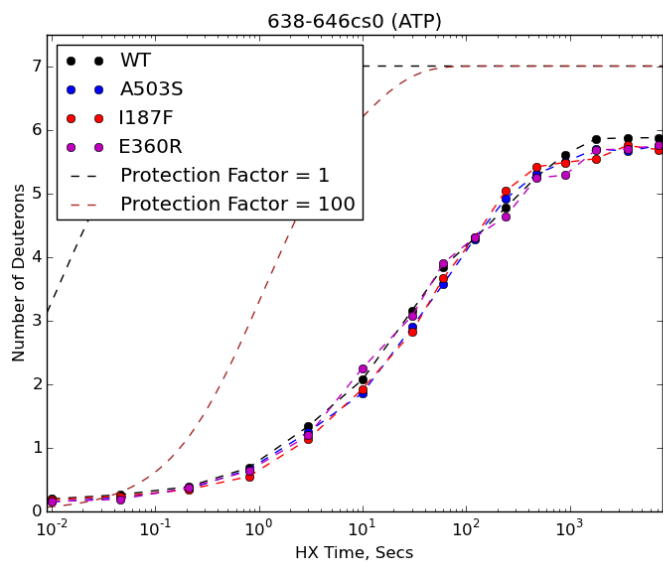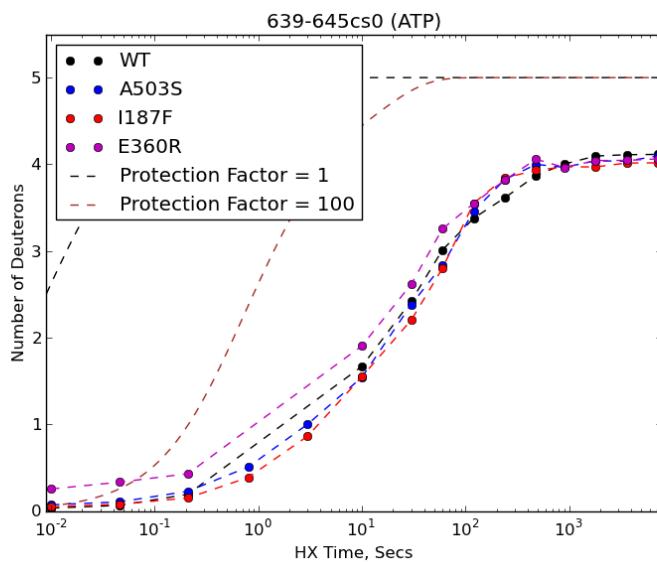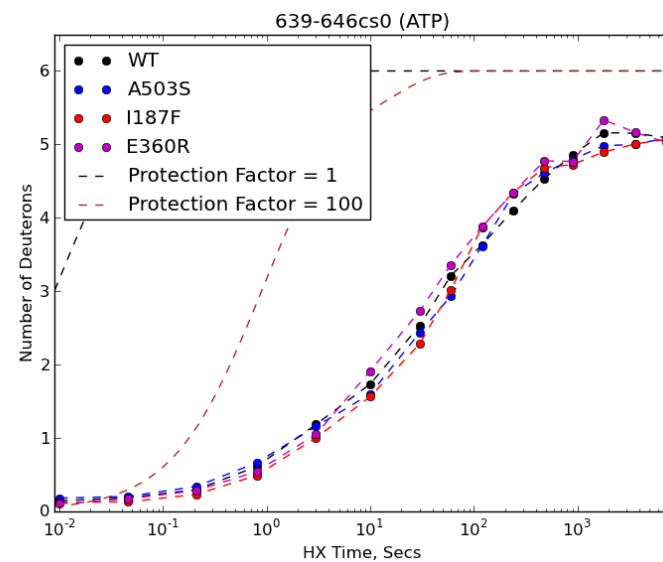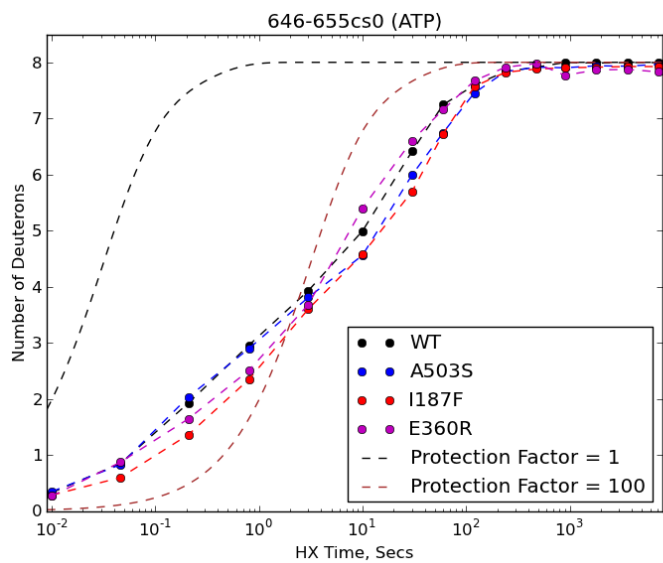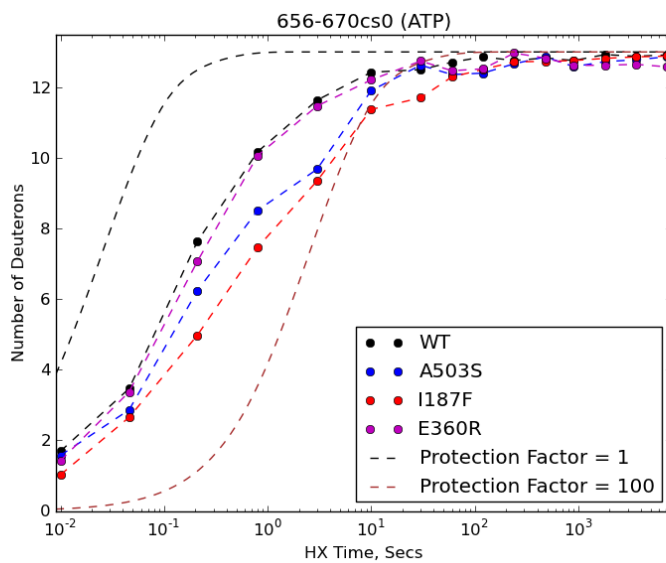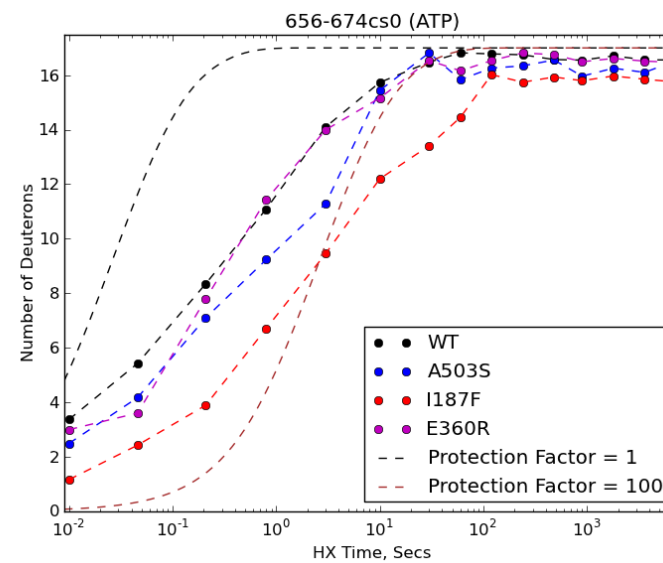

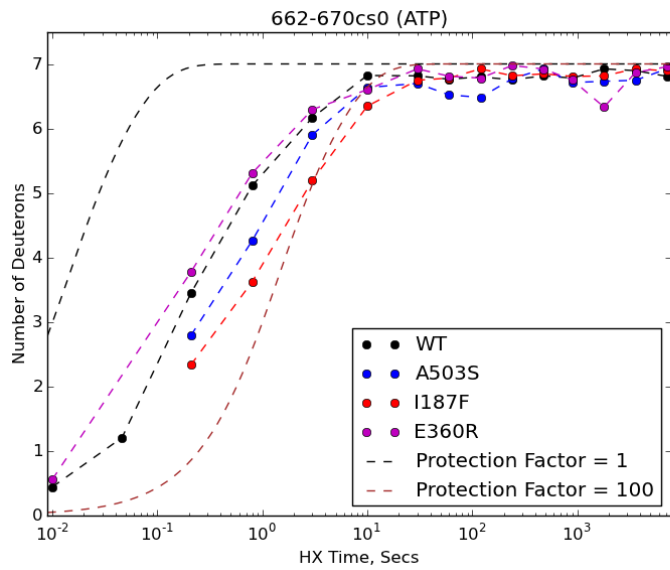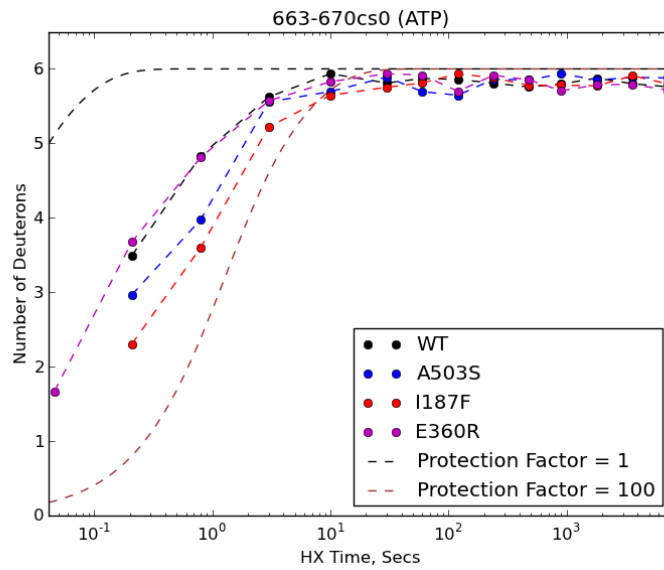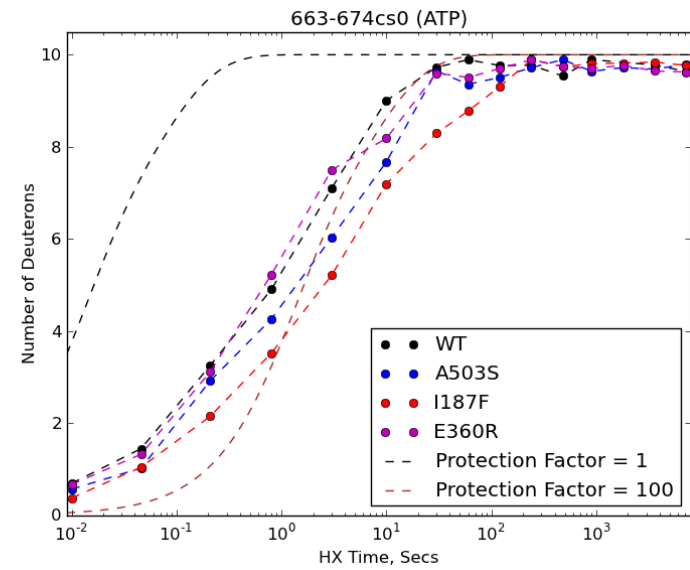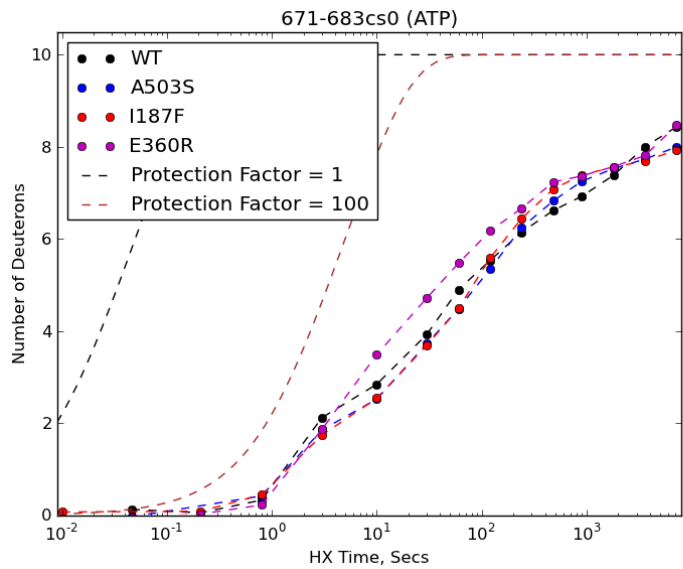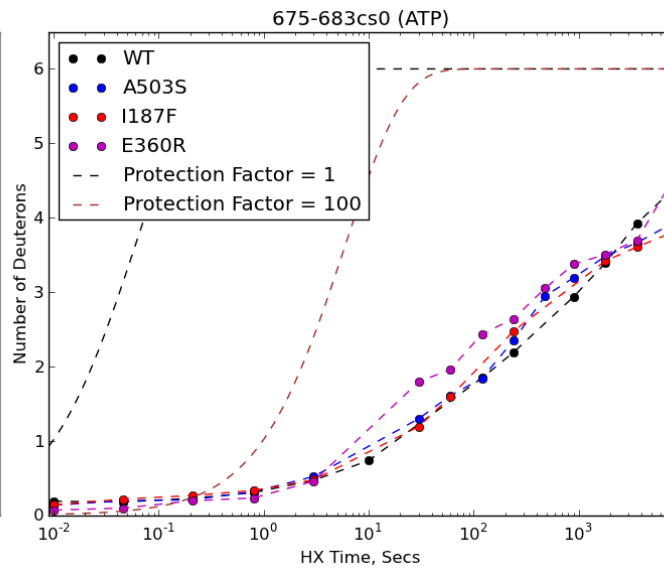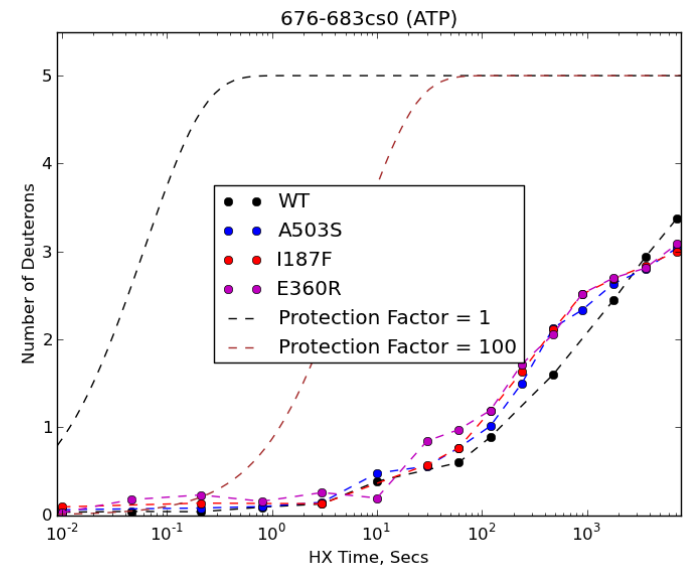

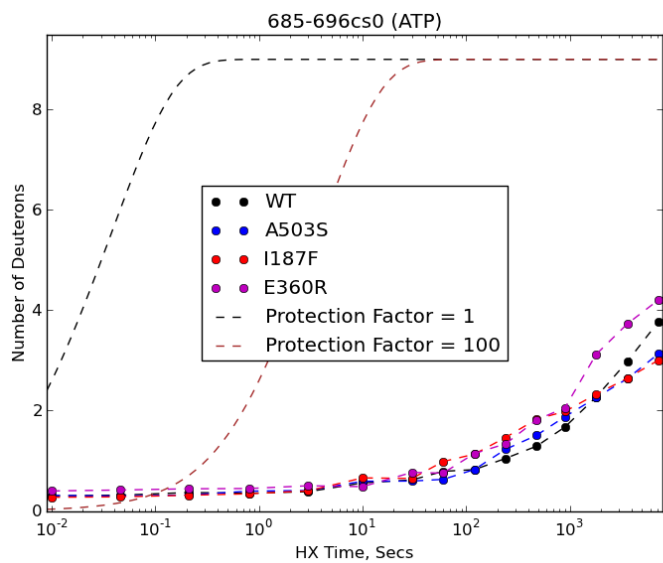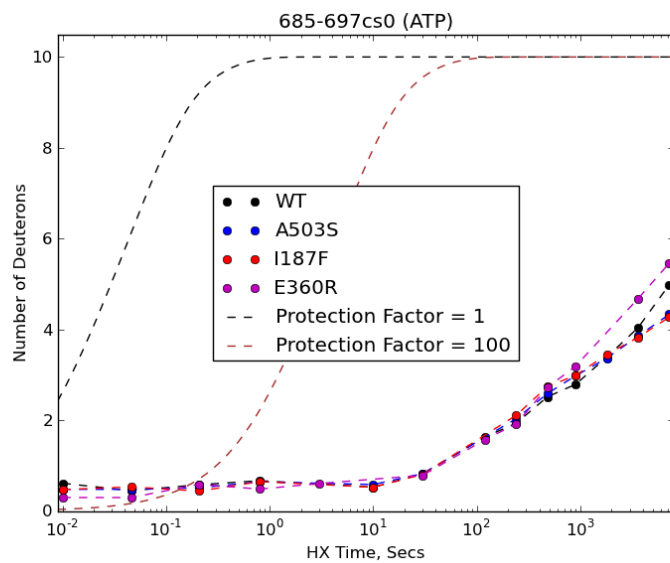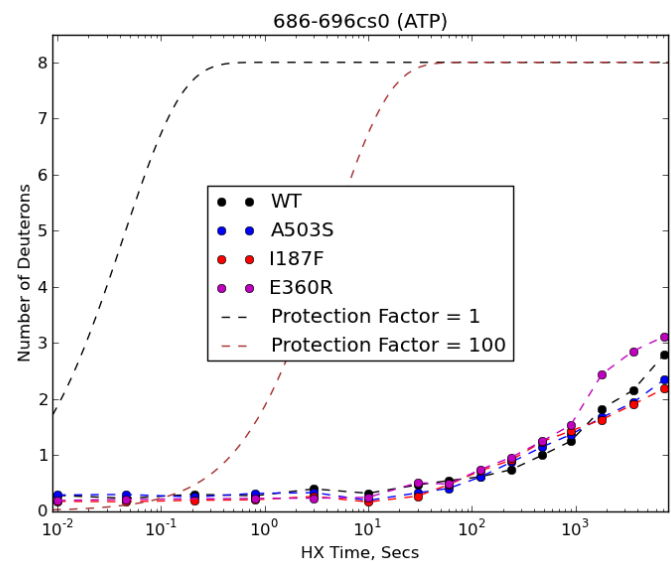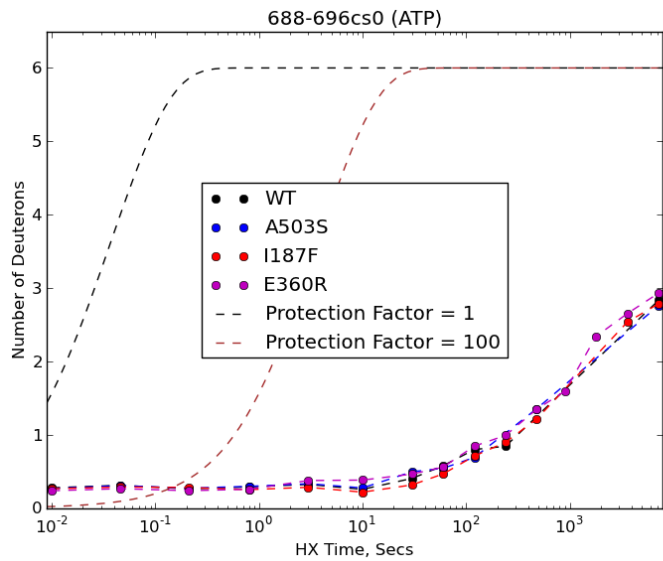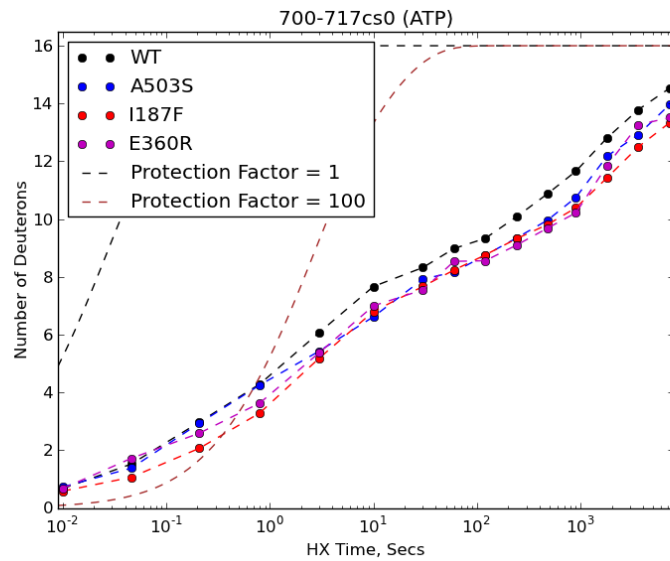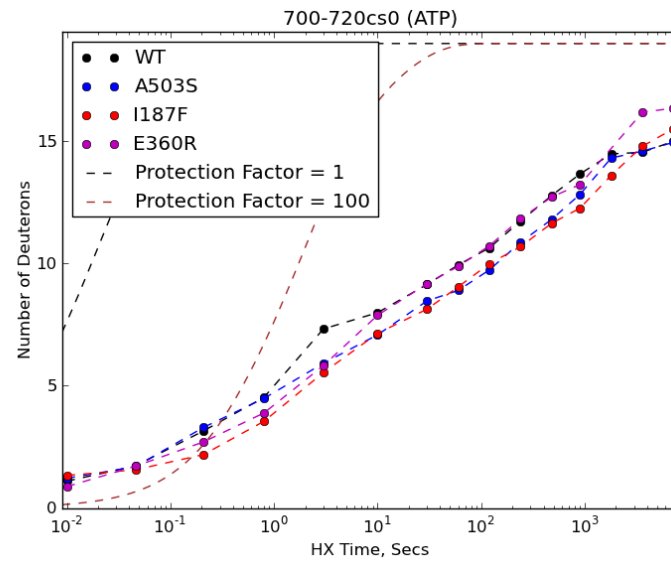

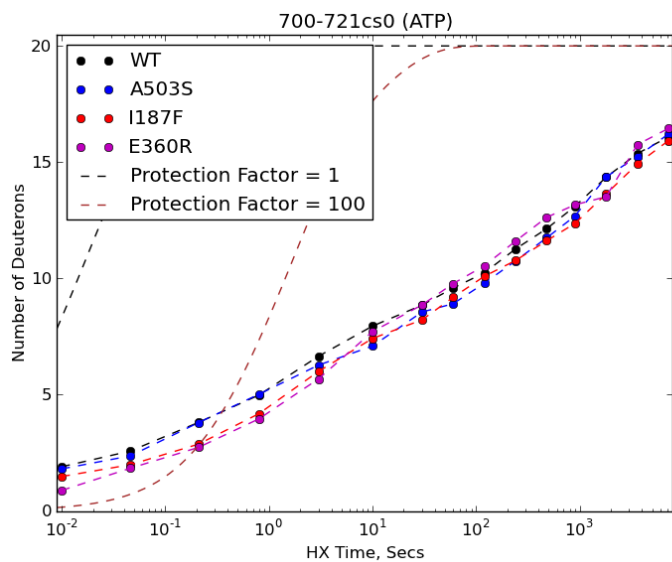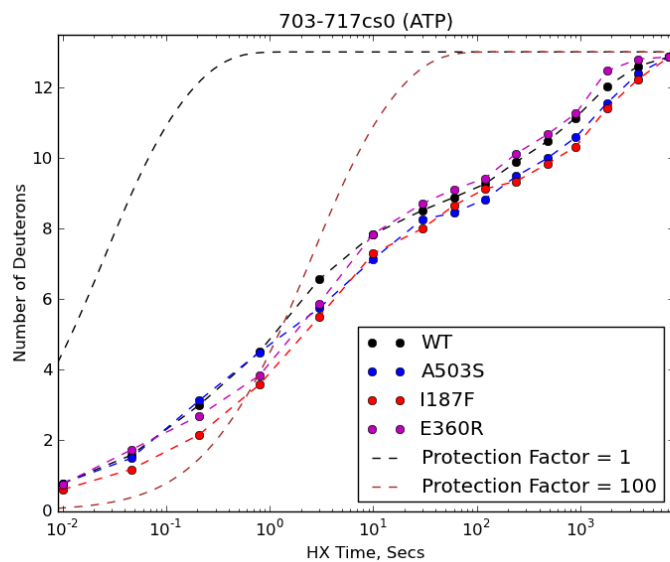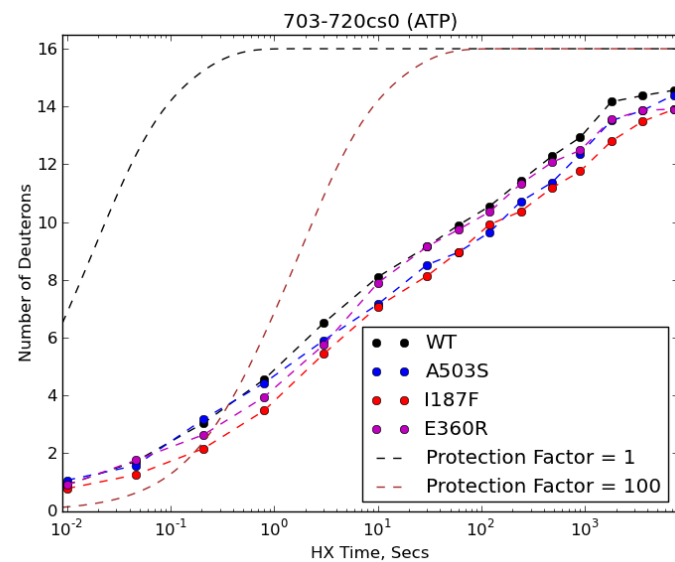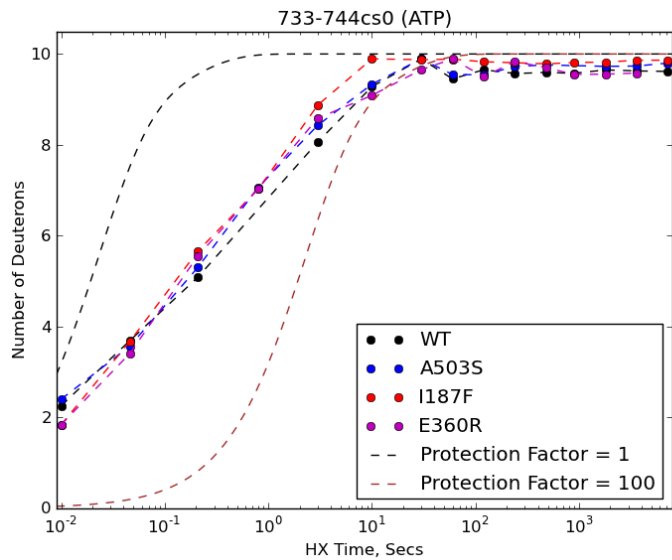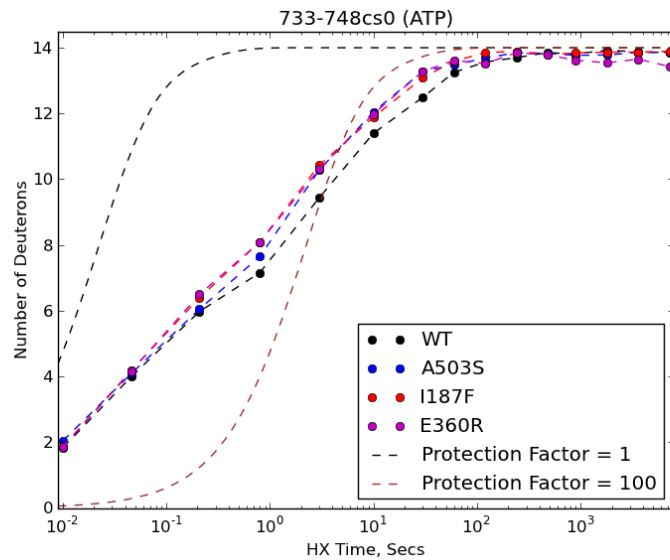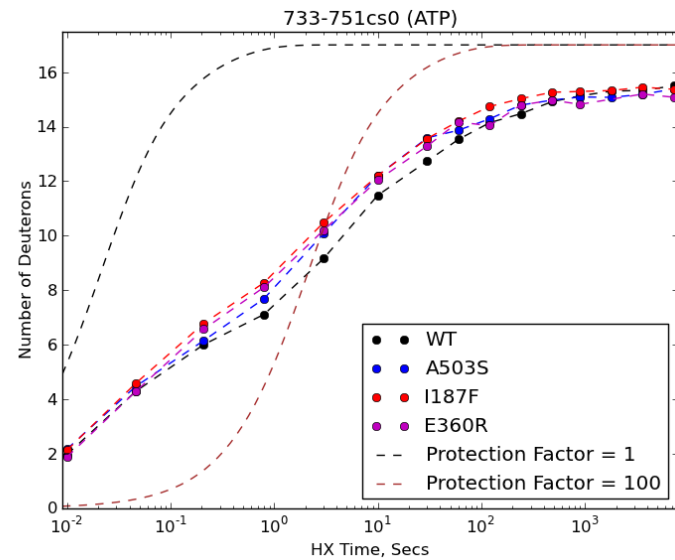

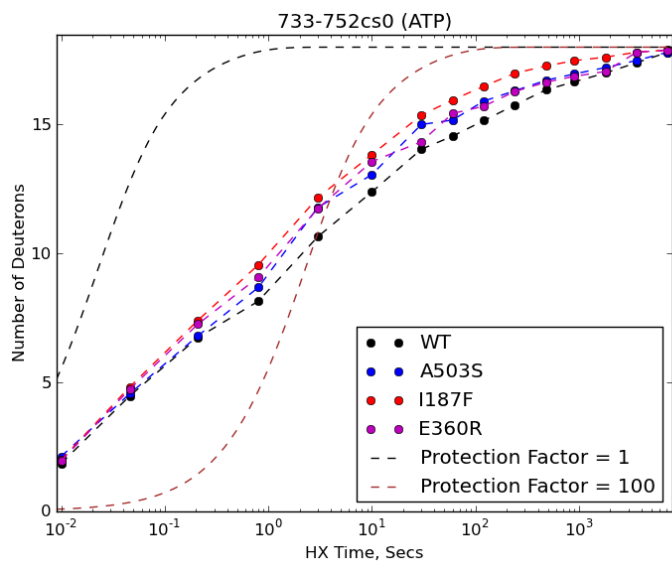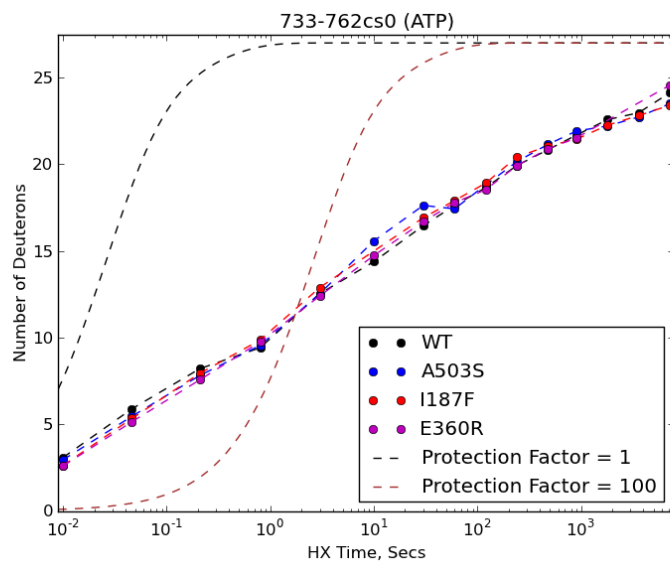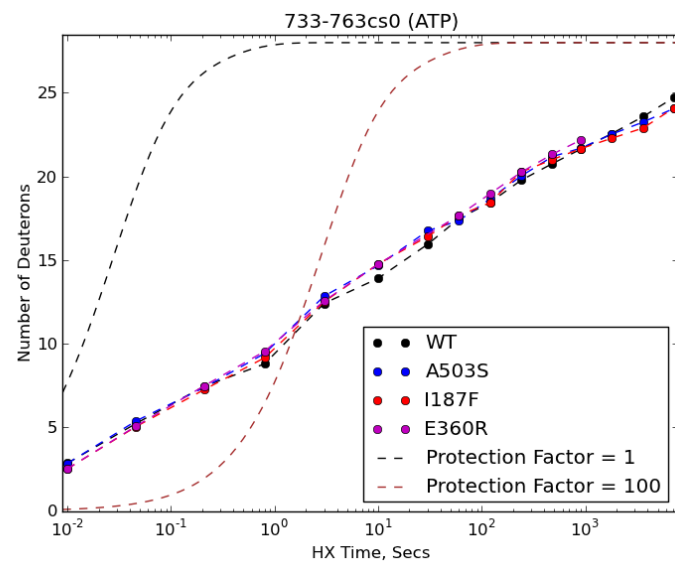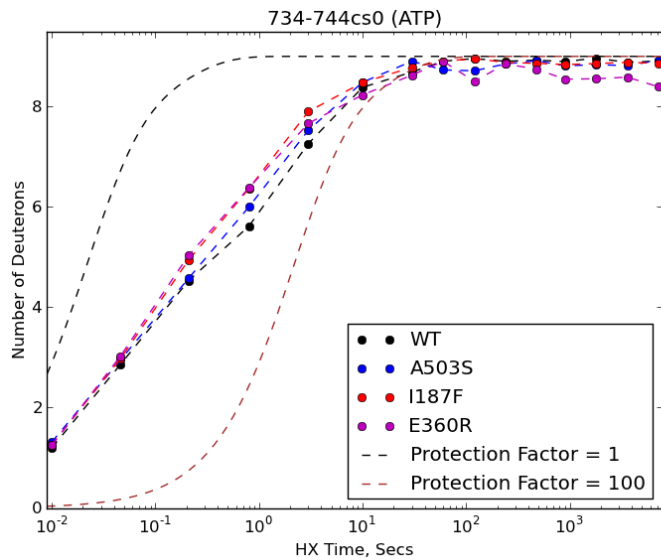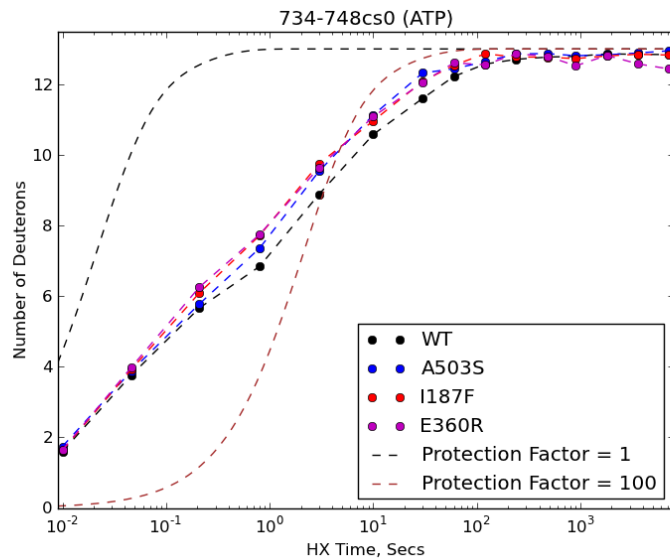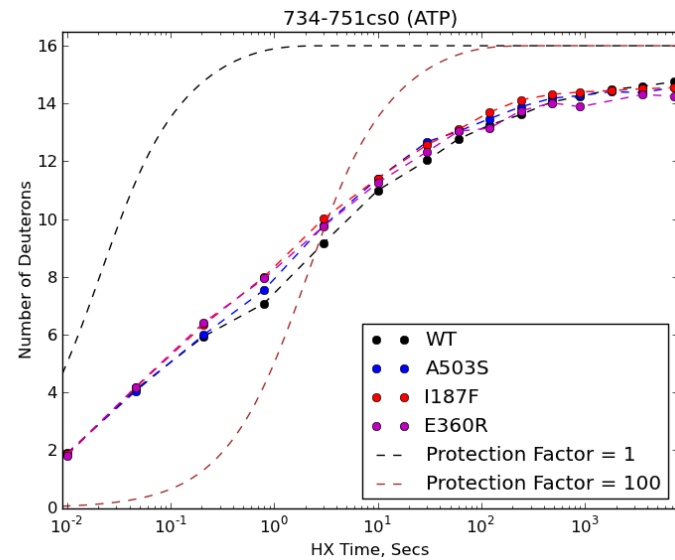

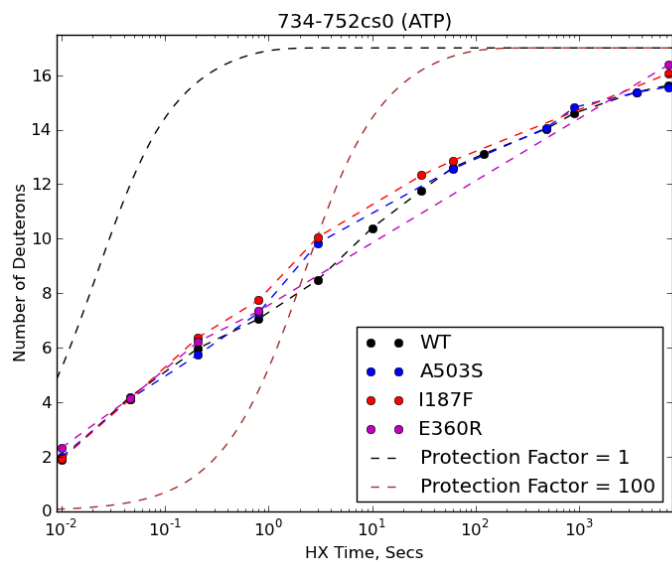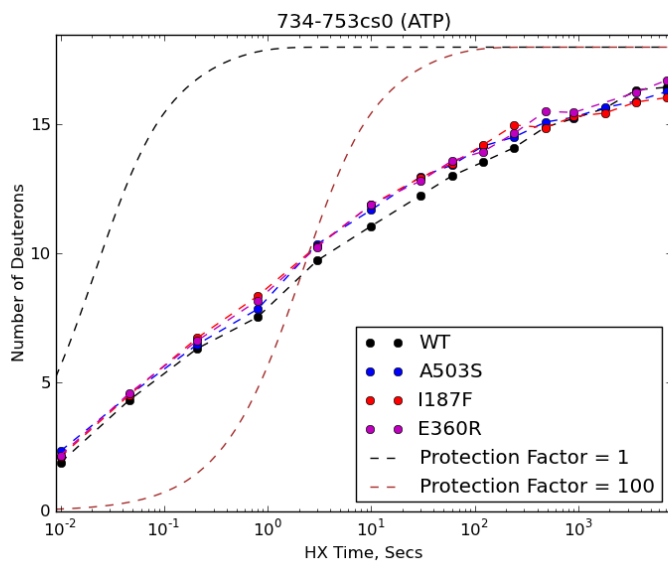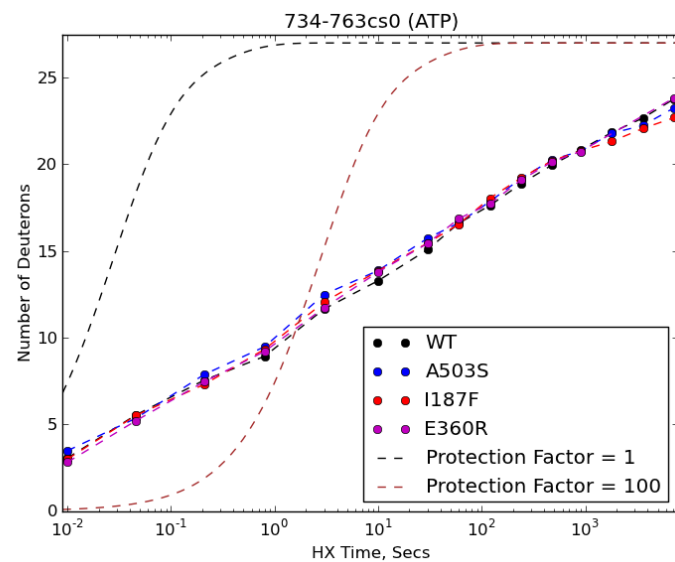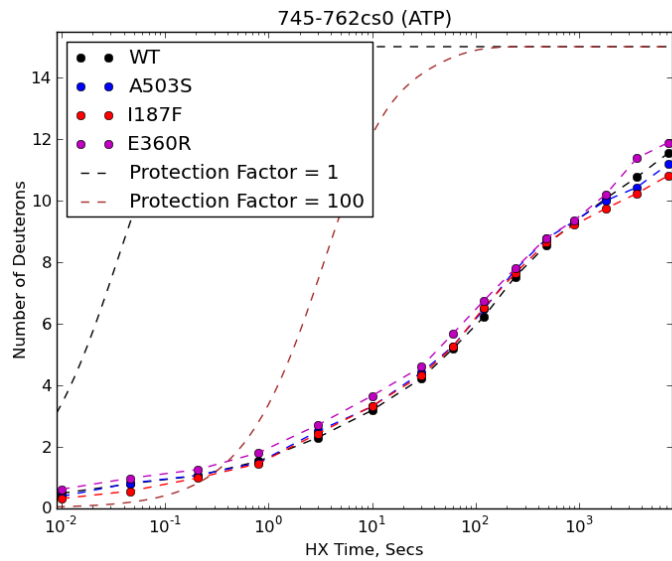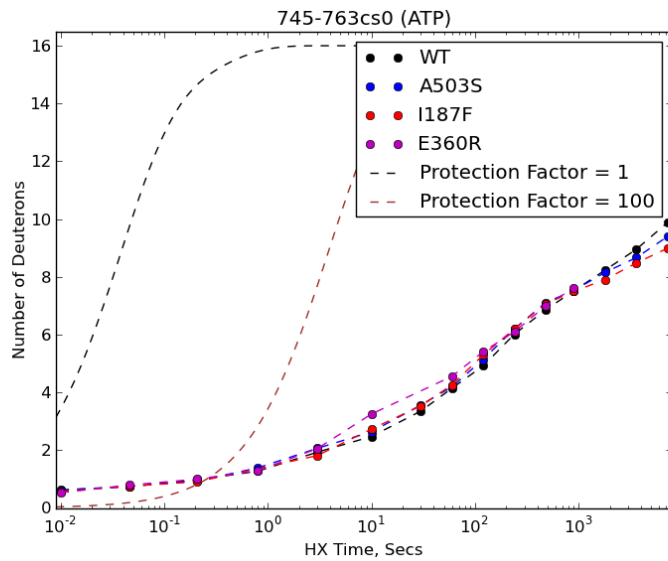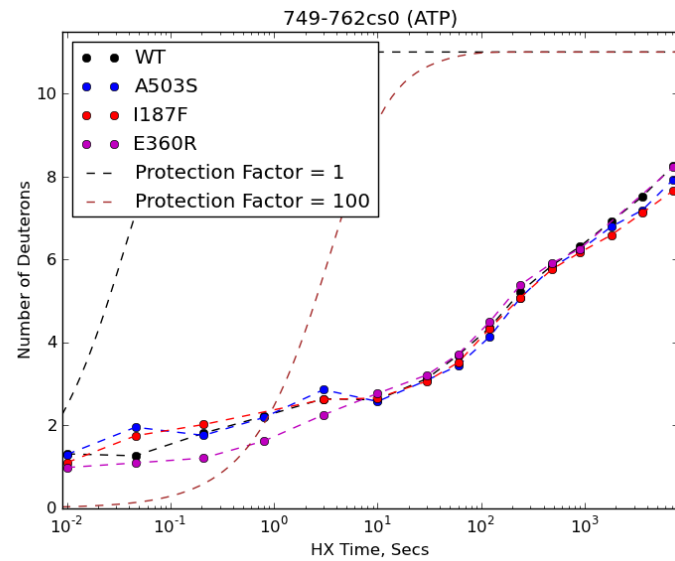

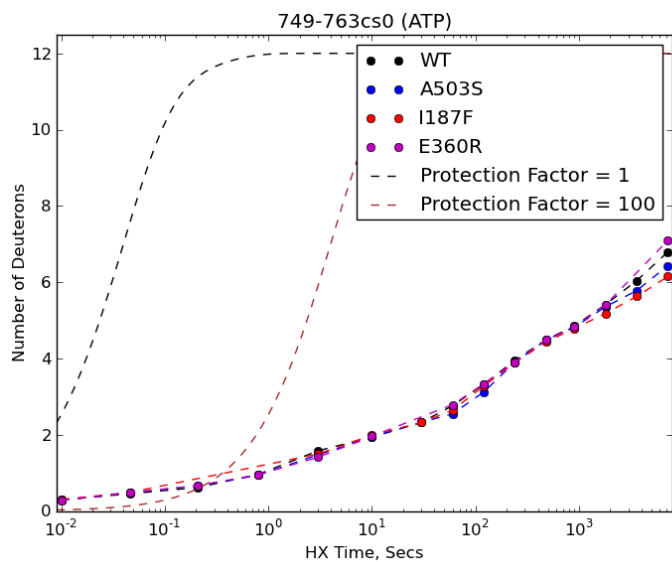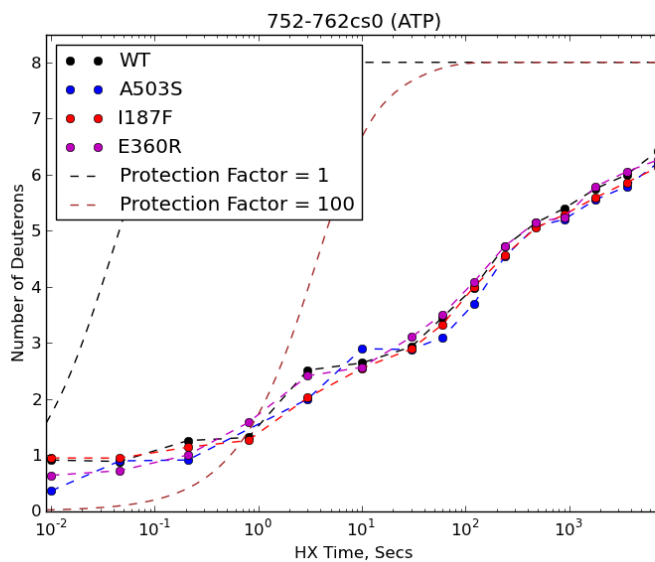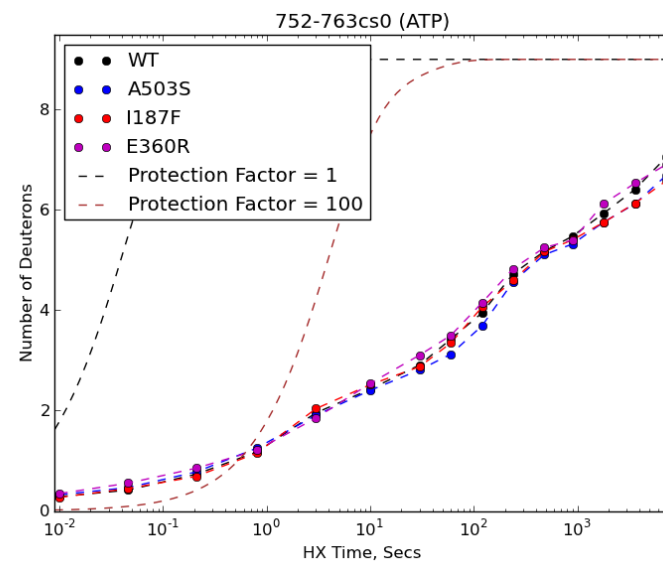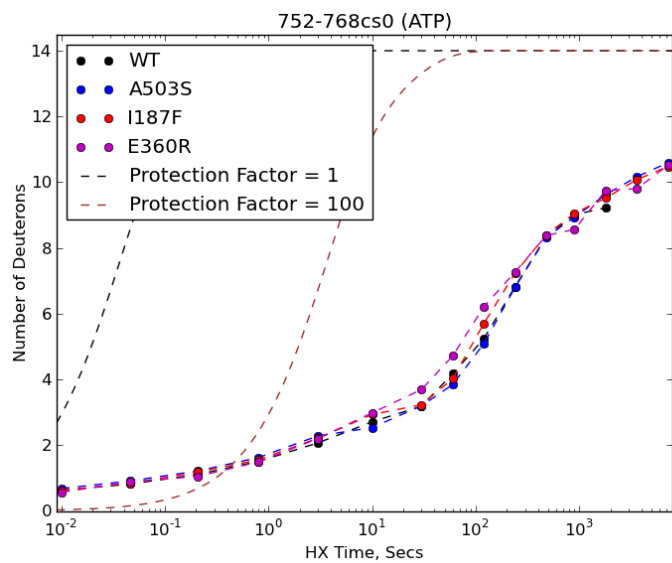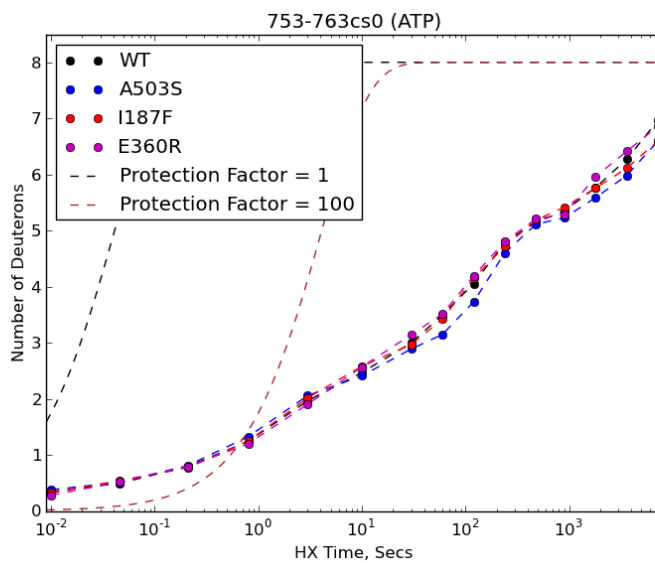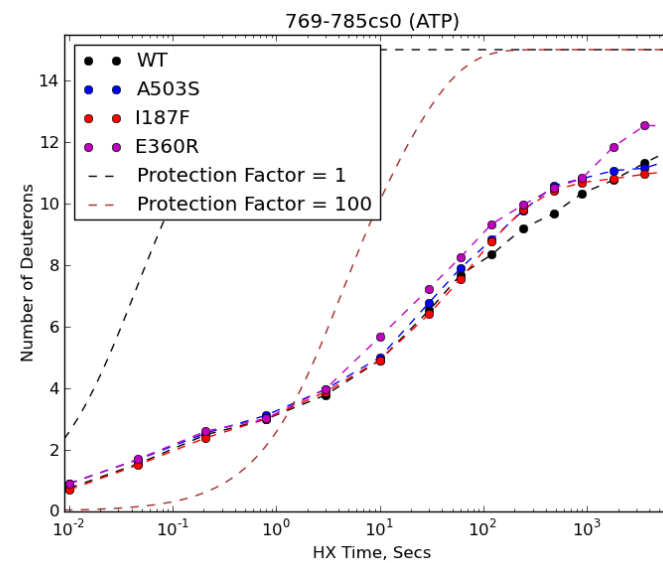



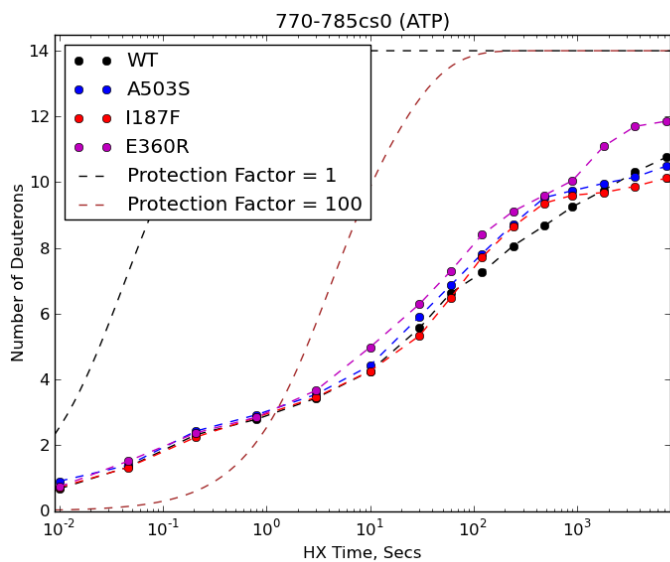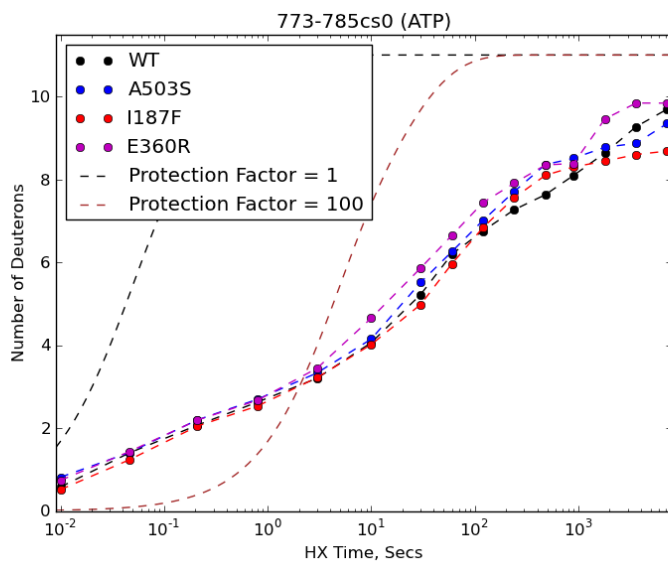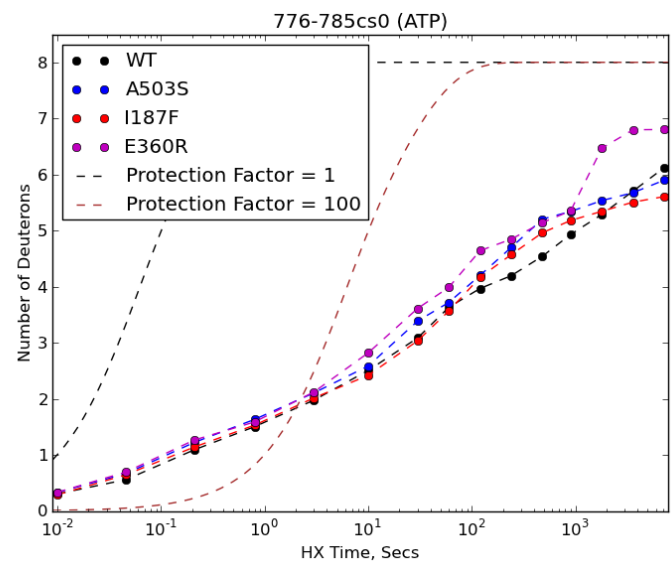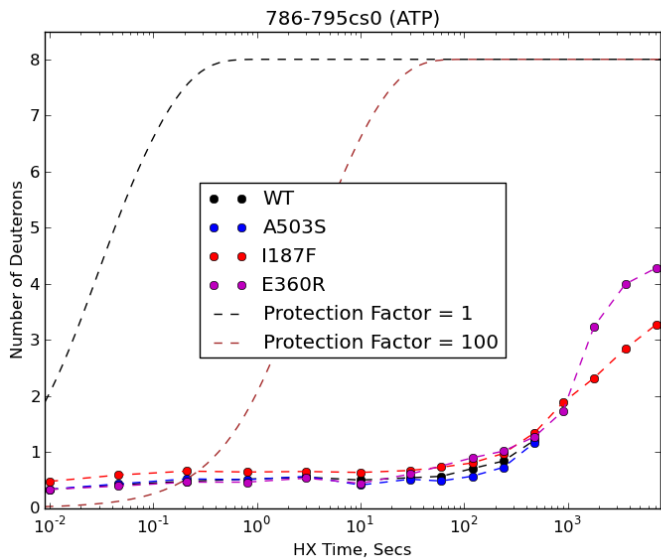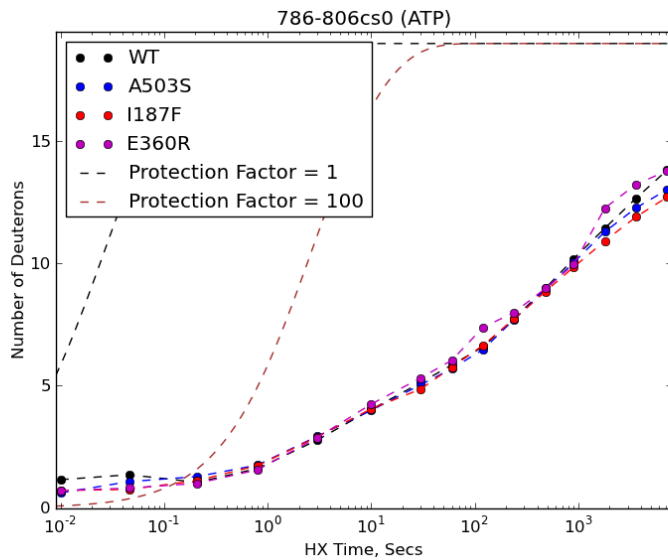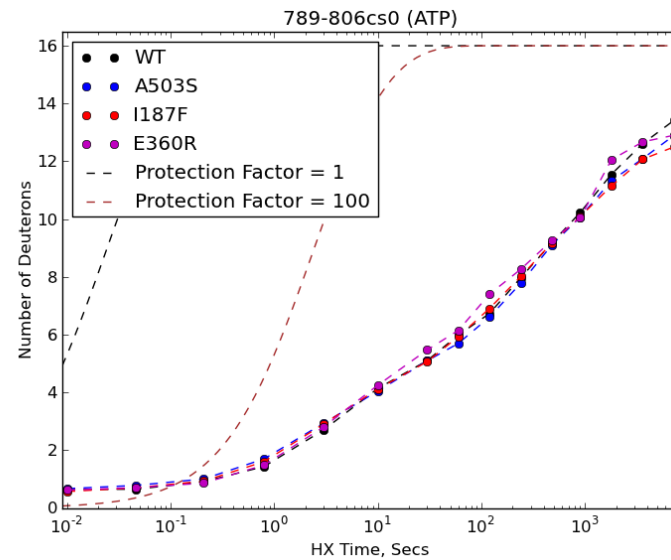

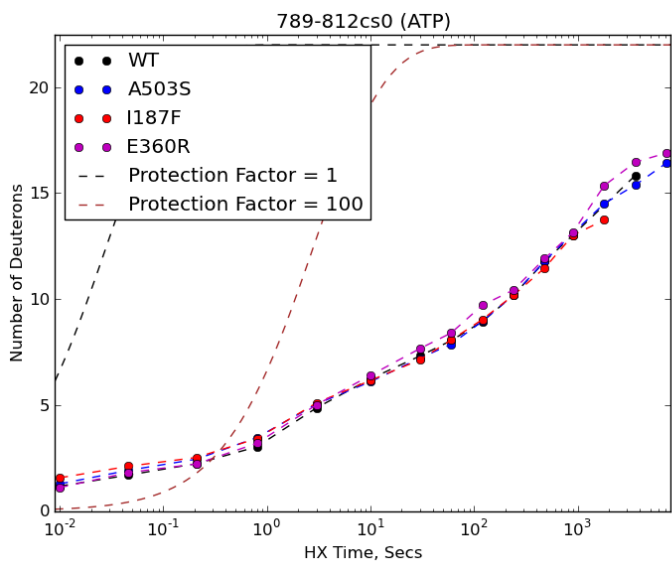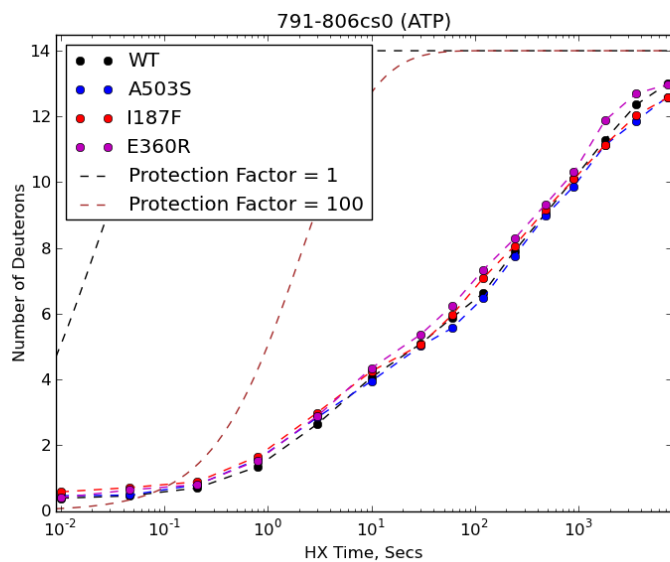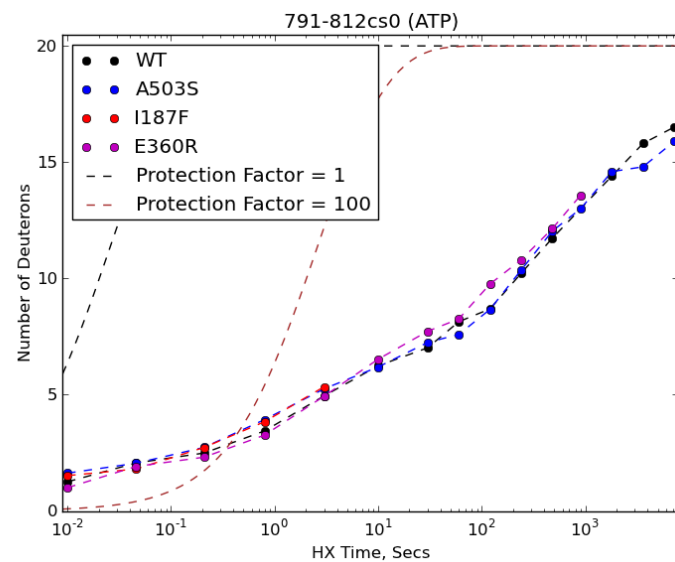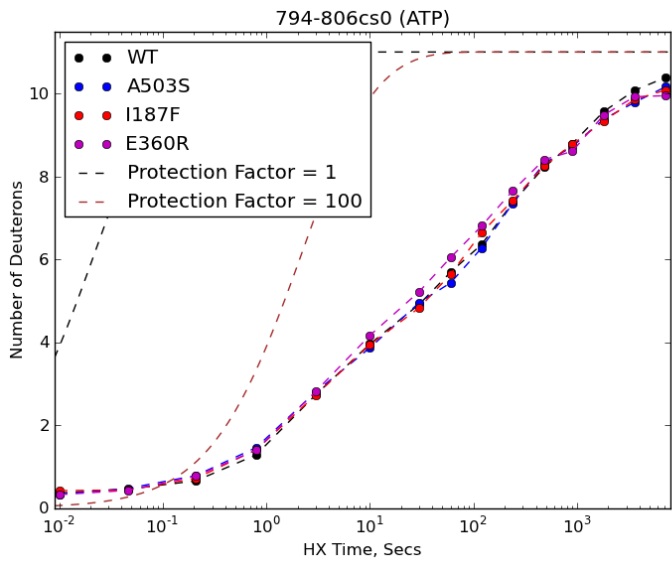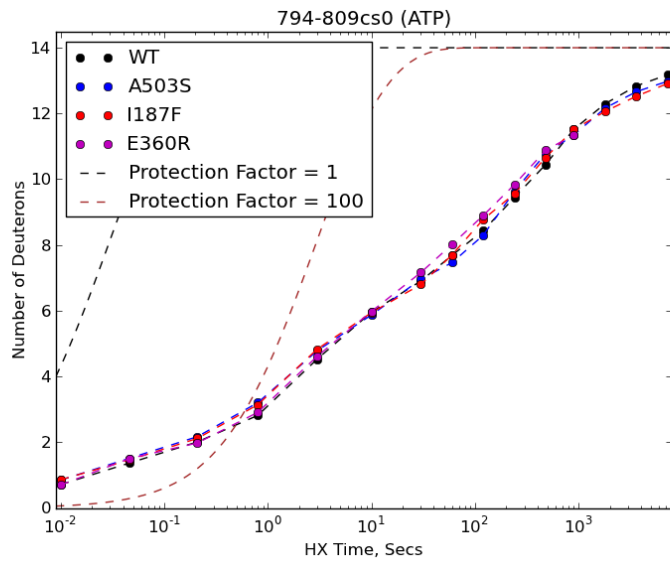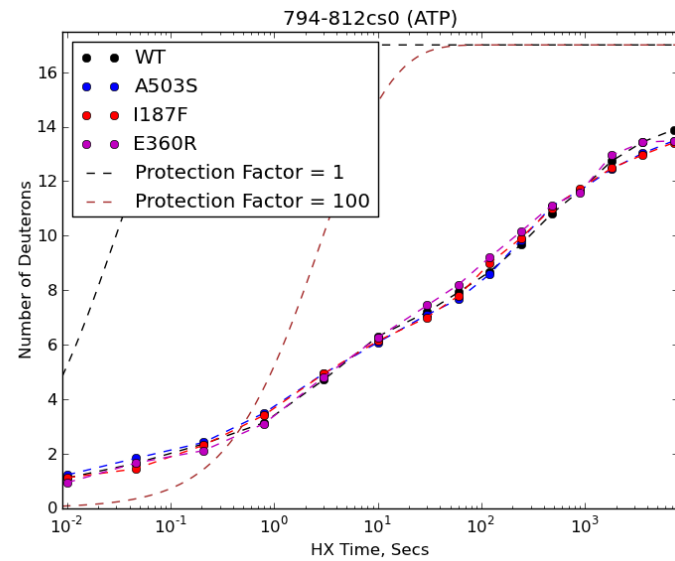

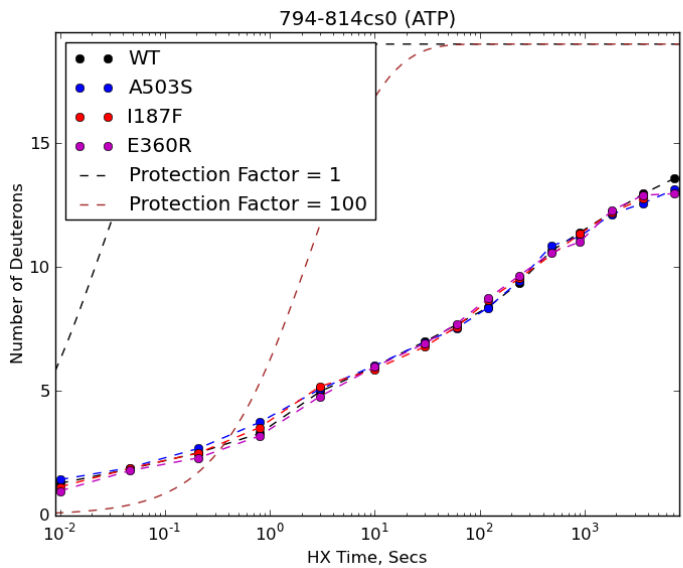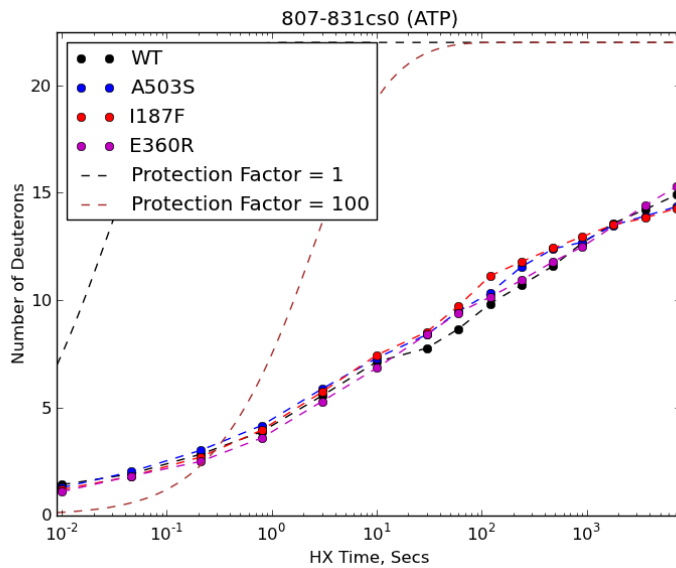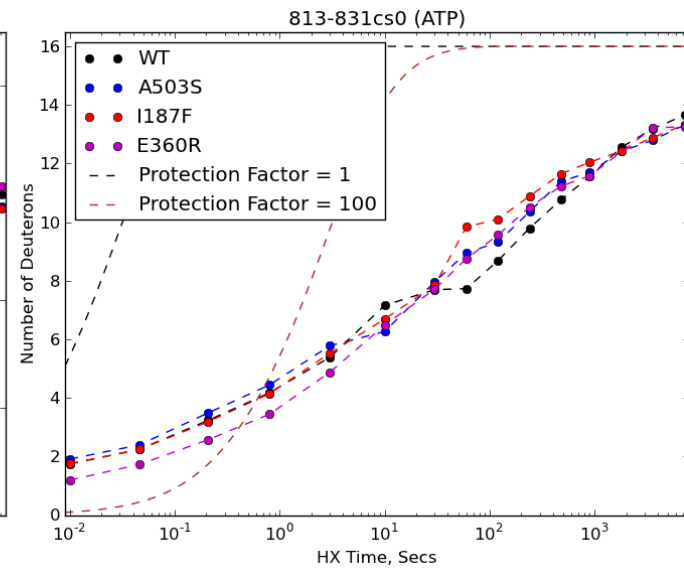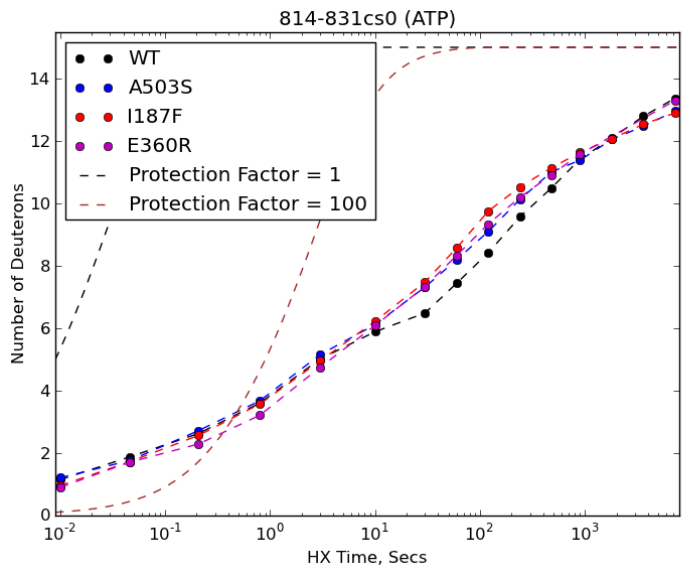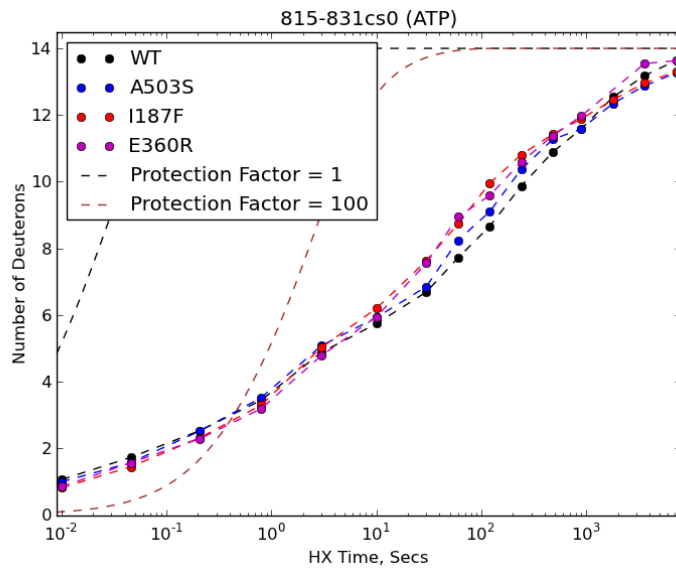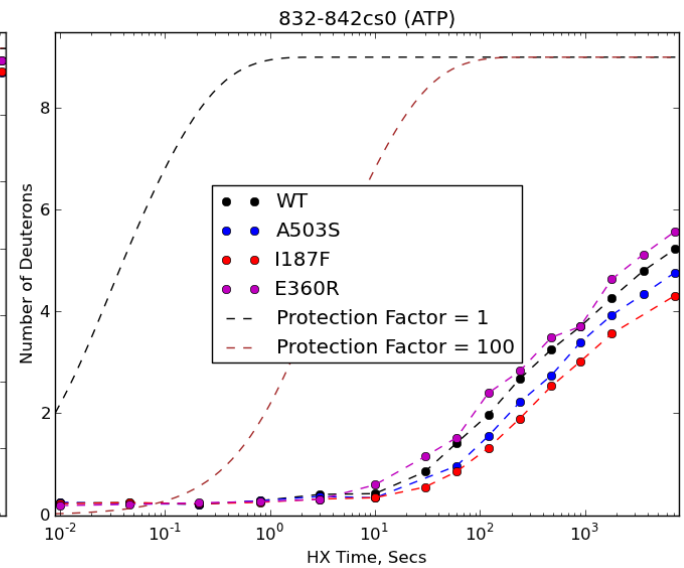

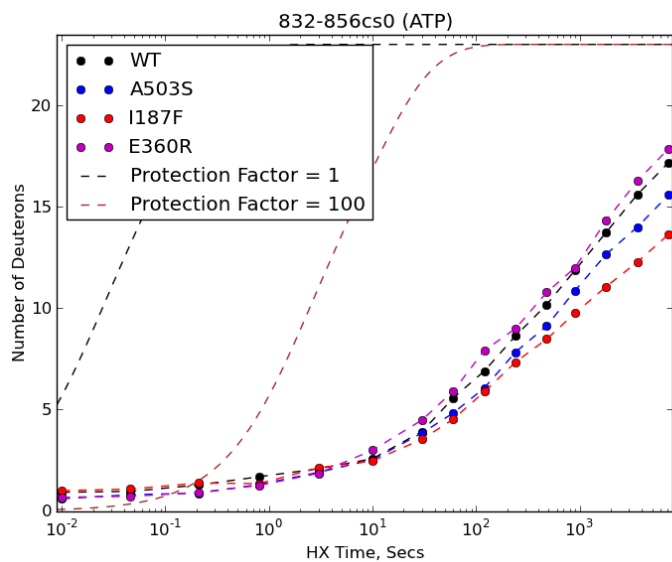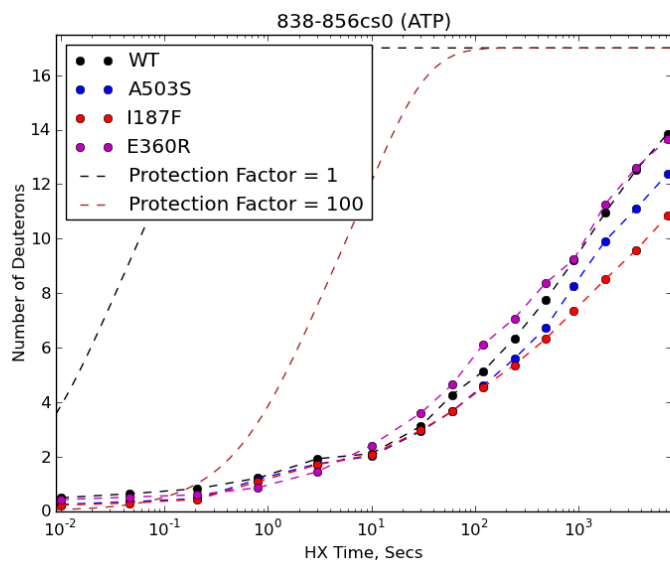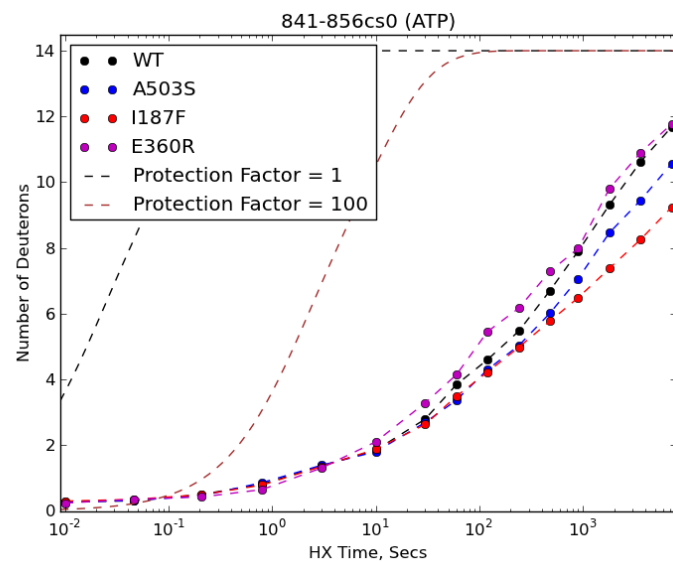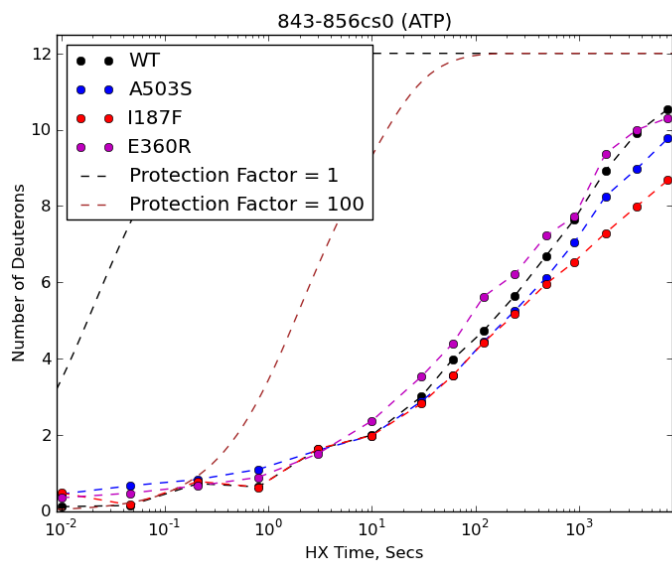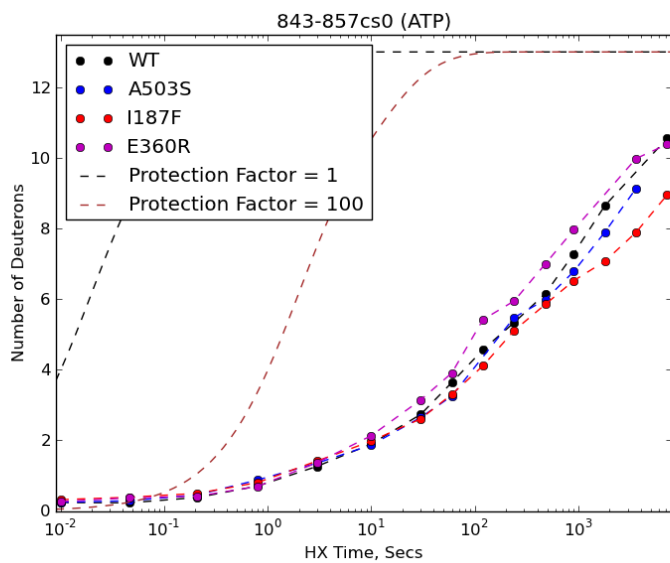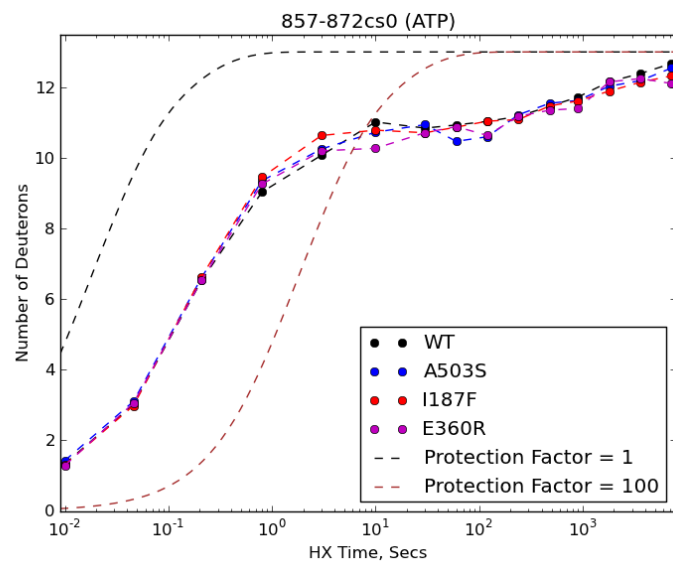

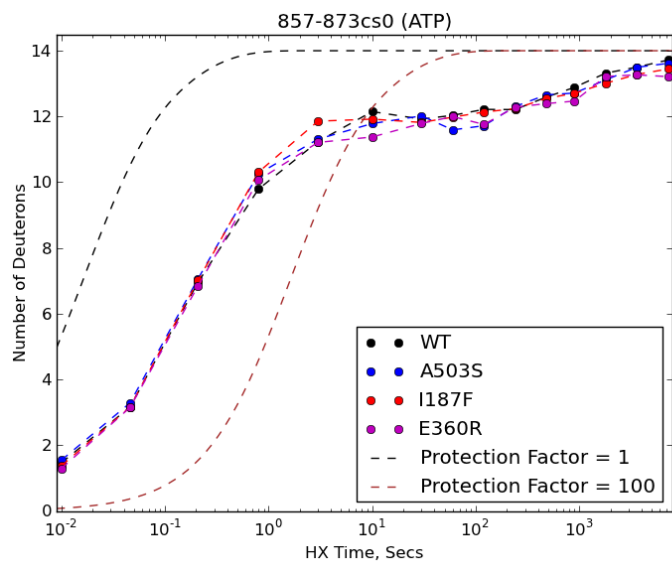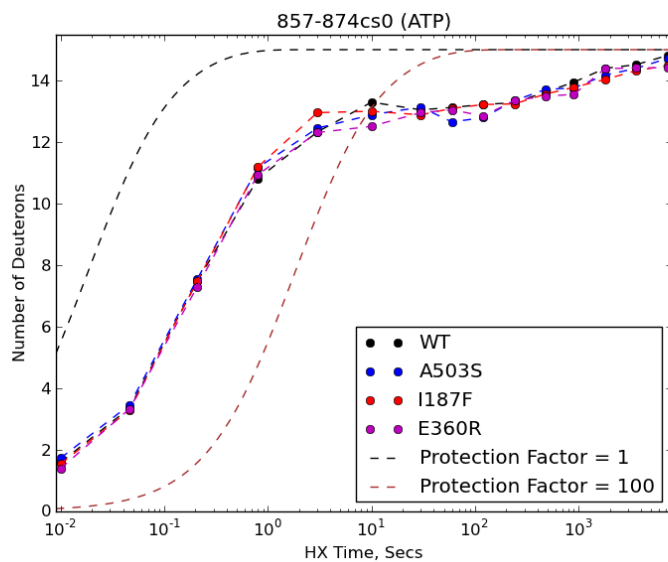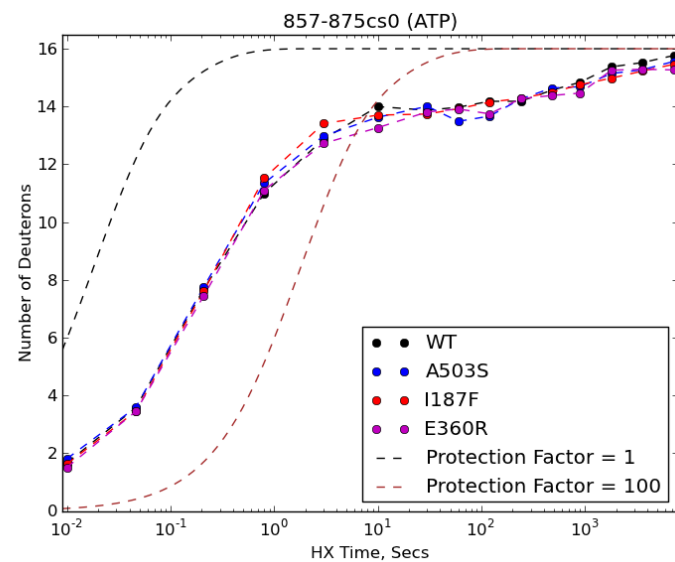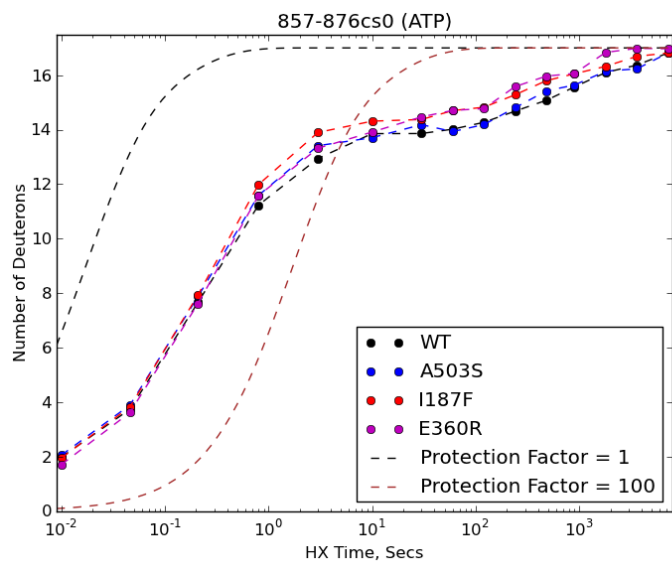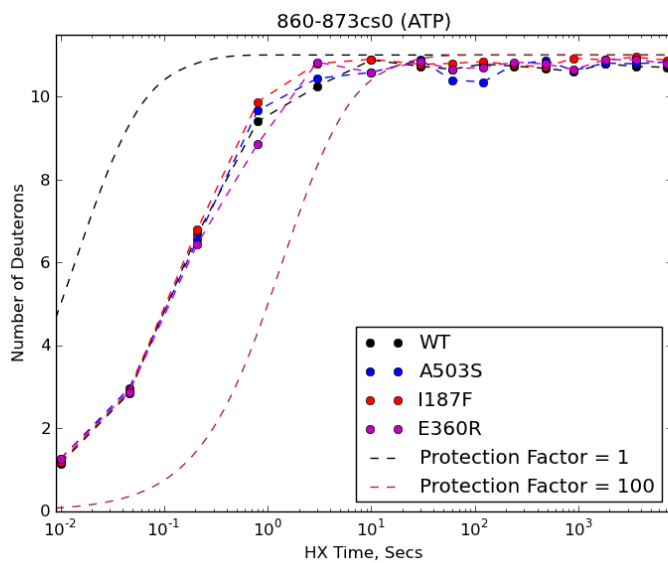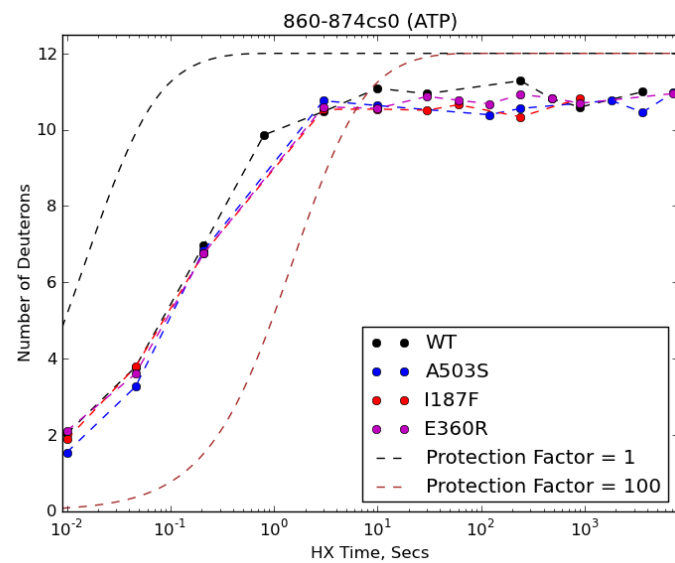

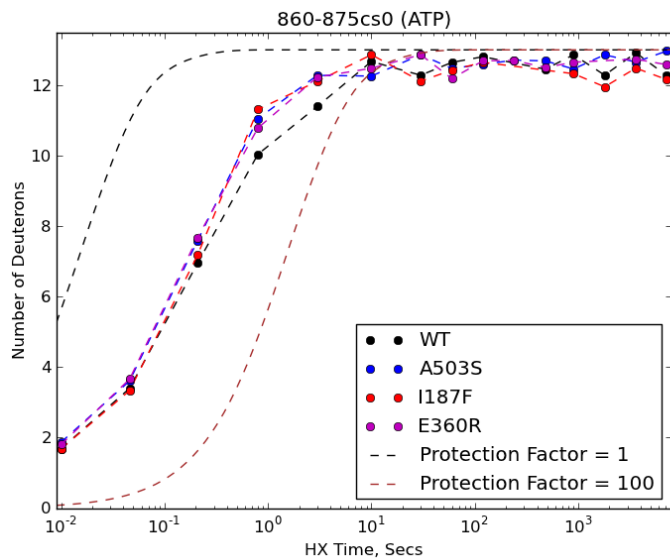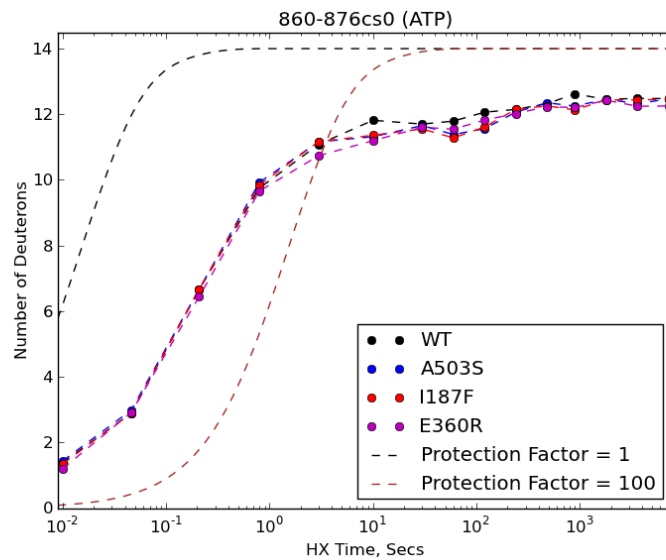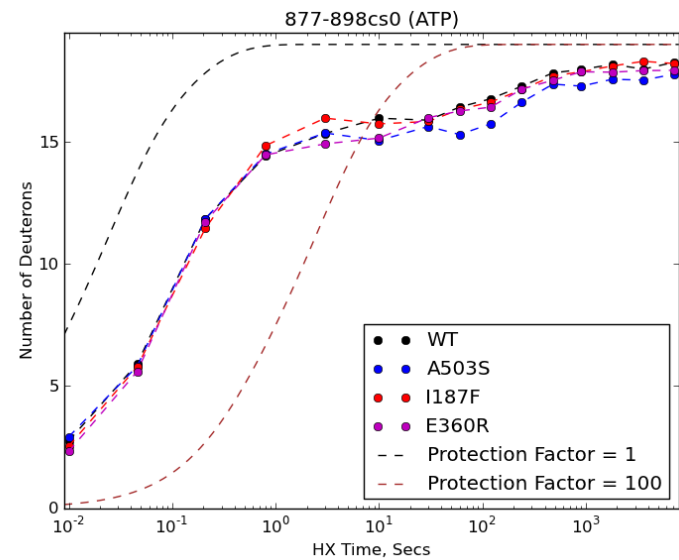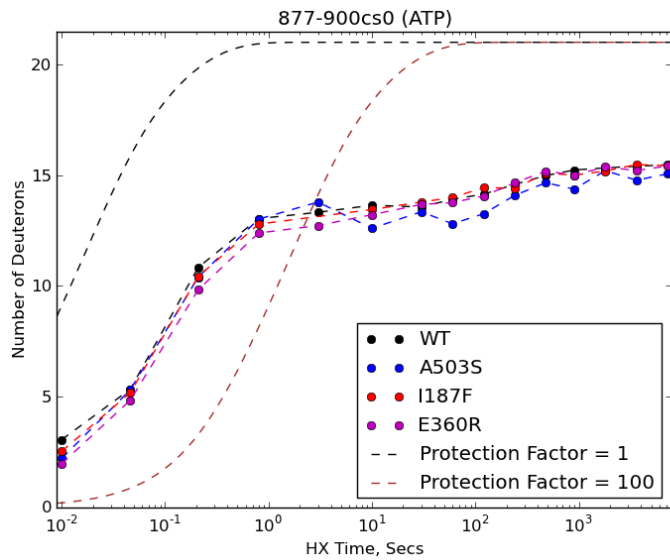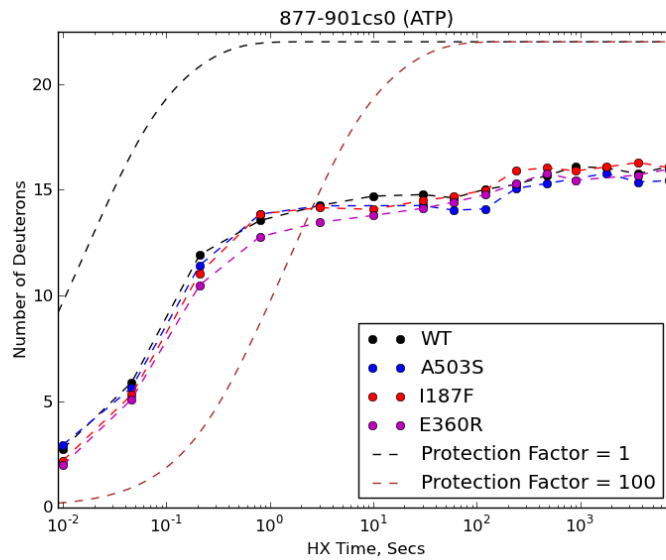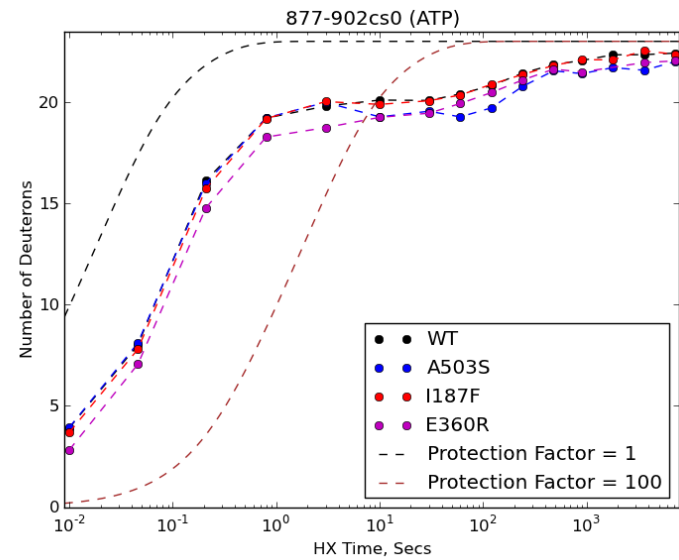

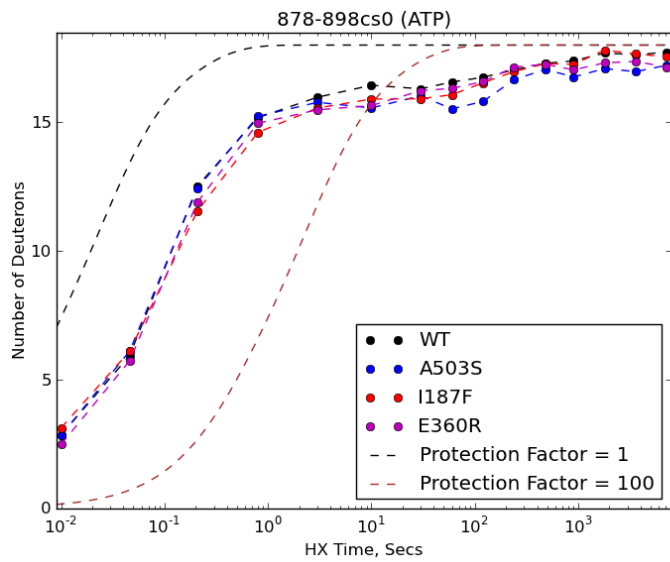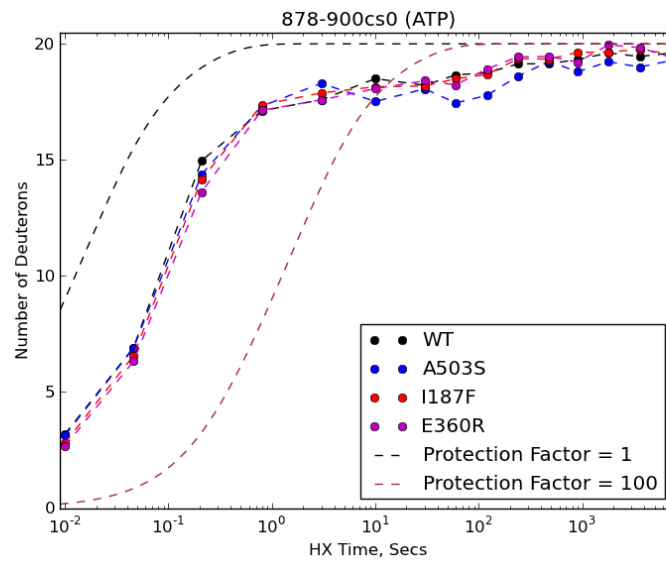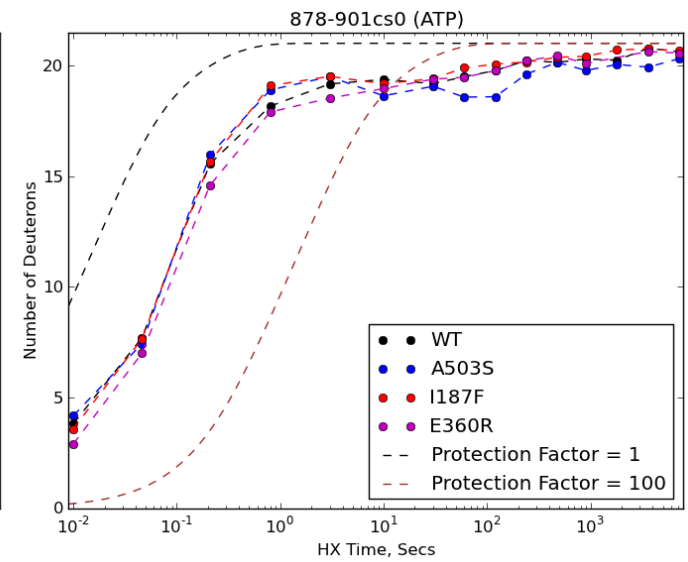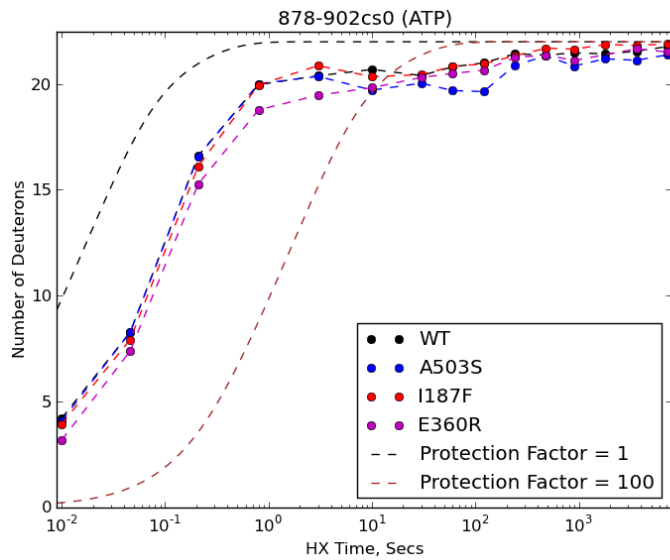

Supplement: pnas.1921968117.sd01.pdf [file pnas.1921968117.sd01.pdf]
